# Supplementary material for: Topiroxostat versus allopurinol in patients with chronic heart failure complicated by hyperuricemia: A prospective, randomized, open-label, blinded-end-point clinical trial
Source: PubMed Central journal article supplement (PMC8789120; doi:10.1371/journal.pone.0261445), 2022-01-25
Supplement: pone.0261445.s008.pdf [file pone.0261445.s008.pdf]

高尿酸血症を合併した心不全患者における  
トピロキソスタットとアロプリノールのランダム化比較試験

The **E**ffect of **X**anthine Oxidase Inhibitor  
in **C**hron**I**c heart failure patients  
complica**TED** with hyper-**U**ricemi**A**  
**Excited-UA study**

統計解析報告書  
Ver 1.1

研究代表者：

獨協医科大学病院 心臓・血管内科 教授 井上 晃男

統計解析責任者：

株式会社 総合医科学研究所 医薬臨床研究支援事業部 山田 博万

統計解析報告書の作成・変更履歴

| 日付         | 版番号 | 変更点                         |
|------------|-----|-----------------------------|
| 2019/05/20 | 1.0 | 初版作成                        |
| 2019/05/24 | 1.1 | 統計解析報告書 Ver1.1 に対応した解析結果の追加 |

## 目次

|                                                |    |
|------------------------------------------------|----|
| 1. 研究のフローチャート.....                             | 1  |
| 図 1.1. 研究のフローチャート.....                         | 1  |
| 2. 研究対象者の内訳.....                               | 2  |
| 表 2.1. 研究対象者の内訳.....                           | 2  |
| 3. 研究対象者背景.....                                | 3  |
| 表 3.1. [FAS] 研究対象者背景(連続変数).....                | 3  |
| 表 3.2. [FAS] 研究対象者背景(カテゴリ変数).....              | 3  |
| 表 3.3. [FAS] 心不全の原疾患 / その他の心不全 の詳細.....        | 5  |
| 表 3.4. [FAS] 既往歴の詳細.....                       | 6  |
| 表 3.5. [FAS] 各合併症の詳細.....                      | 8  |
| 4. 主要評価項目.....                                 | 10 |
| 4.1. FAS.....                                  | 10 |
| 表 4.1.1. [FAS] 要約統計量と t 検定、Wilcoxon 検定.....    | 10 |
| 表 4.1.2. [FAS] 共分散分析.....                      | 10 |
| 表 4.1.3. [FAS] MMRM.....                       | 10 |
| 4.2. PPS.....                                  | 11 |
| 表 4.2.1. [PPS] 要約統計量と t 検定、Wilcoxon 検定.....    | 11 |
| 表 4.2.2. [PPS] 共分散分析.....                      | 11 |
| 表 4.2.3. [PPS] MMRM.....                       | 11 |
| 5. 副次評価項目.....                                 | 12 |
| 5.1. FAS.....                                  | 12 |
| 表 5.1.1. [FAS] 24 週変化率以外も含めた NT-proBNP.....    | 12 |
| 表 5.1.2. [FAS] BNP.....                        | 13 |
| 表 5.1.3. [FAS] NT-proBNP の変化率と BNP 変化率の相関..... | 14 |
| 表 5.1.4. [FAS] FMD.....                        | 15 |
| 表 5.1.5. [FAS] EndoPAT.....                    | 16 |
| 表 5.1.6. [FAS] FMD の変化量と EndoPAT の変化量の相関.....  | 17 |
| 表 5.1.7. [FAS] 血中尿酸値.....                      | 18 |
| 表 5.1.8. [FAS] バイタルサイン、一般血液・尿検査.....           | 19 |
| 表 5.1.9. [FAS] 心臓超音波検査パラメーター.....              | 34 |
| 表 5.1.10. [FAS] 特殊血液検査.....                    | 37 |
| 表 5.1.11. [FAS] 特殊尿検査.....                     | 41 |
| 5.2. PPS.....                                  | 50 |
| 表 5.2.1. [PPS] 24 週変化率以外も含めた NT-proBNP.....    | 50 |
| 表 5.2.2. [PPS] BNP.....                        | 51 |
| 表 5.2.3. [PPS] NT-proBNP の変化率と BNP 変化率の相関..... | 52 |
| 表 5.2.4. [PPS] FMD.....                        | 53 |
| 表 5.2.5. [PPS] EndoPAT.....                    | 54 |
| 表 5.2.6. [PPS] FMD の変化量と EndoPAT の変化量の相関.....  | 55 |
| 表 5.2.7. [PPS] 血中尿酸値.....                      | 56 |
| 表 5.2.8. [PPS] バイタルサイン、一般血液・尿検査.....           | 57 |
| 表 5.2.9. [PPS] 心臓超音波検査パラメーター.....              | 72 |
| 表 5.2.10. [PPS] 特殊血液検査.....                    | 75 |
| 表 5.2.11. [PPS] 特殊尿検査.....                     | 79 |
| 6. 安全性評価項目.....                                | 88 |

|                                                           |     |
|-----------------------------------------------------------|-----|
| 6.1. 有害事象 .....                                           | 88  |
| 表 6.1.1. [安全性解析対象集団] 有害事象の発現件数.....                       | 88  |
| 表 6.1.2. [安全性解析対象集団] 有害事象の発現例数と発現率(%).....                | 90  |
| 6.2. 痛風関節炎(副作用) .....                                     | 92  |
| 6.2.1. FAS/安全性解析対象集団.....                                 | 92  |
| 表 6.2.1.1. [FAS/安全性解析対象集団] 痛風関節炎(副作用)の発現件数.....           | 92  |
| 表 6.2.1.2. [FAS/安全性解析対象集団] 痛風関節炎(副作用)の発現例数と発現率(%).....    | 92  |
| 6.2.2. PPS.....                                           | 93  |
| 表 6.2.2.1. [PPS] 痛風関節炎(副作用)の発現件数.....                     | 93  |
| 表 6.2.2.2. [PPS] 痛風関節炎(副作用)の発現例数と発現率(%).....              | 93  |
| 6.3. 肝機能検査値異常(副作用) .....                                  | 94  |
| 6.3.1. FAS/安全性解析対象集団.....                                 | 94  |
| 表 6.3.1.1. [FAS/安全性解析対象集団] 肝機能検査値異常(副作用)の発現件数.....        | 94  |
| 表 6.3.1.2. [FAS/安全性解析対象集団] 肝機能検査値異常(副作用)の発現例数と発現率(%)..... | 94  |
| 6.3.2. PPS.....                                           | 95  |
| 表 6.3.2.1. [PPS] 肝機能検査値異常(副作用)の発現件数.....                  | 95  |
| 表 6.3.2.2. [PPS] 肝機能検査値異常(副作用)の発現例数と発現率(%).....           | 95  |
| 7. 部分集団解析.....                                            | 96  |
| 7.1. FAS .....                                            | 96  |
| 7.1.1. 部分集団 1.....                                        | 96  |
| 表 7.1.1.1. [FAS] 要約統計量と t 検定、Wilcoxon 検定.....             | 96  |
| 表 7.1.1.2. [FAS] 共分散分析.....                               | 96  |
| 表 7.1.1.3. [FAS] MMRM.....                                | 96  |
| 7.1.2. 部分集団 2.....                                        | 97  |
| 表 7.1.2.1. [FAS] 要約統計量と t 検定、Wilcoxon 検定.....             | 97  |
| 表 7.1.2.2. [FAS] 共分散分析.....                               | 97  |
| 表 7.1.2.3. [FAS] MMRM.....                                | 97  |
| 7.1.3. 部分集団 3.....                                        | 98  |
| 表 7.1.3.1. [FAS] 要約統計量と t 検定、Wilcoxon 検定.....             | 98  |
| 表 7.1.3.2. [FAS] 共分散分析.....                               | 98  |
| 表 7.1.3.3. [FAS] MMRM.....                                | 98  |
| 7.2. PPS.....                                             | 99  |
| 7.2.1. 部分集団 1.....                                        | 99  |
| 表 7.2.1.1. [PPS] 要約統計量と t 検定、Wilcoxon 検定.....             | 99  |
| 表 7.2.1.2. [PPS] 共分散分析.....                               | 99  |
| 表 7.2.1.3. [PPS] MMRM.....                                | 99  |
| 7.2.2. 部分集団 2.....                                        | 100 |
| 表 7.2.2.1. [PPS] 要約統計量と t 検定、Wilcoxon 検定.....             | 100 |
| 表 7.2.2.2. [PPS] 共分散分析.....                               | 100 |
| 表 7.2.2.3. [PPS] MMRM.....                                | 100 |
| 7.2.3. 部分集団 3.....                                        | 101 |
| 表 7.2.3.1. [PPS] 要約統計量と t 検定、Wilcoxon 検定.....             | 101 |
| 表 7.2.3.2. [PPS] 共分散分析.....                               | 101 |
| 表 7.2.3.3. [PPS] MMRM.....                                | 101 |
| 8. 薬剤情報 .....                                             | 102 |
| 表 8.1. [FAS] 研究対象薬の服薬の有無.....                             | 102 |
| 表 8.2. [FAS] 研究対象薬トピロキソスタットの服薬用量.....                     | 102 |
| 表 8.3. [FAS] 研究対象薬アロプリノールの服薬用量.....                       | 103 |

## 目次

|                               |     |
|-------------------------------|-----|
| 表 8.4. [FAS] 併用薬 ベースライン時..... | 104 |
| 表 8.5. [FAS] 併用薬 12 週時.....   | 107 |
| 表 8.6. [FAS] 併用薬 24 週時.....   | 110 |

1. 研究のフローチャート

研究のフローチャートを図 1.1 に示す。

図 1.1. 研究のフローチャート  
 カッコ内の数字は該当症例数を示す。

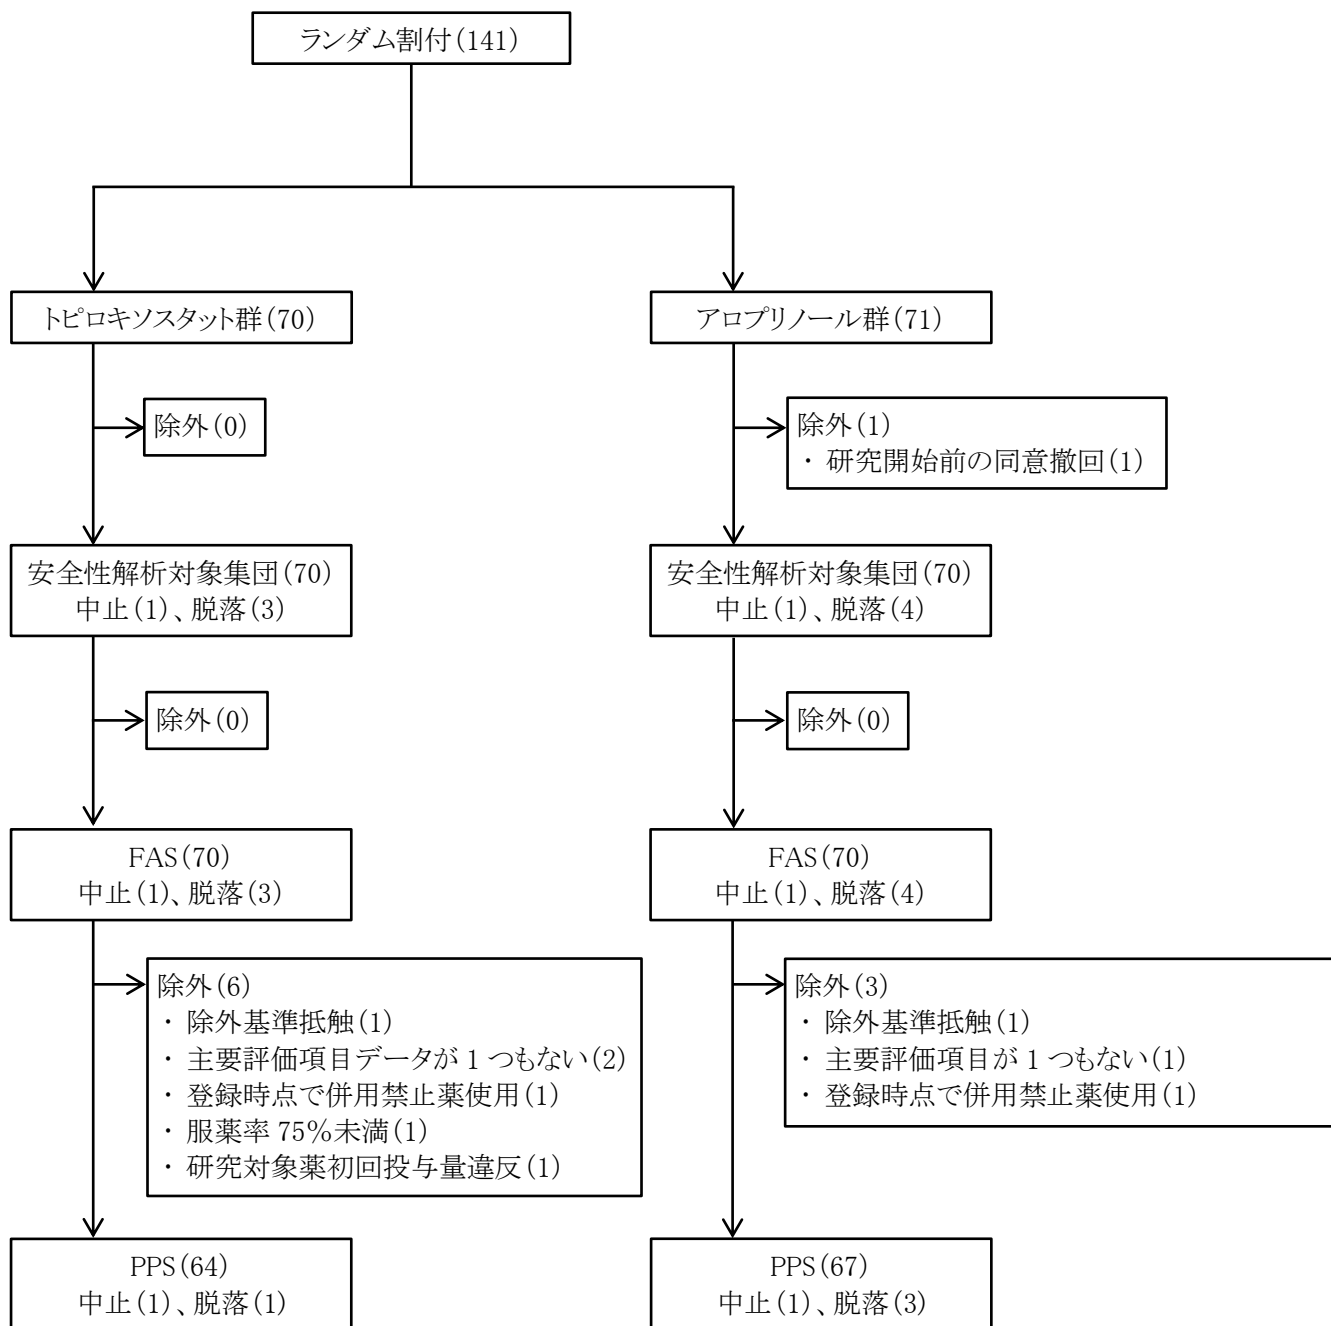

## 2. 研究対象者の内訳

### 2. 研究対象者の内訳

研究対象者の内訳を表 2.1 に示す。

表 2.1. 研究対象者の内訳

| 対象                                          | 症例数        |          |
|---------------------------------------------|------------|----------|
|                                             | トピキシソスタット群 | アロプリノール群 |
| 本研究に登録された症例                                 | 70         | 71       |
| 安全性解析集団の症例                                  | 70         | 70       |
| FAS 集団の症例                                   | 70         | 70       |
| PPS 集団の症例                                   | 64         | 67       |
| 同意を撤回した症例                                   | 0          | 1        |
| ランダム化後に 1 回も研究対象薬を投薬されていない症例                | 0          | 1        |
| 主要評価項目のデータ (NT-proBNP 変化率) を少なくとも 1 つを有する症例 | 68         | 69       |
| 選択基準に合致しない症例                                | 0          | 0        |
| 除外基準に抵触する症例                                 | 2          | 2        |

※ 除外基準に抵触する症例には、0 週から併用禁止薬を使用していた 2 症例を含む

### 3. 研究対象者背景

#### 3. 研究対象者背景

表 3.1. [FAS] 研究対象者背景(連続変数)

| 変数 | 統計量             | トピロキソスタット群        | アロプリノール群          | 群間比較 P 値 |
|----|-----------------|-------------------|-------------------|----------|
| 年齢 | n               | 70                | 70                |          |
|    | Mean±SD         | 71.7±9.7          | 69.9±9.1          | 0.26     |
|    | Median [Q1, Q3] | 75.0 [66.0, 79.0] | 70.5 [65.0, 77.0] | 0.13     |
|    | Min, Max        | 39.0, 84.0        | 38.0, 85.0        |          |

表 3.2. [FAS] 研究対象者背景(カテゴリ変数)

| 変数                 | 水準    | 症例数(%)               |                    | 群間比較 P 値               |              |
|--------------------|-------|----------------------|--------------------|------------------------|--------------|
|                    |       | トピロキソスタット群<br>n = 70 | アロプリノール群<br>n = 70 | χ <sup>2</sup> 乗<br>検定 | Fisher<br>検定 |
| 性別                 | 男性    | 57 (81.4)            | 56 (80.0)          | 0.83                   | 1.00         |
|                    | 女性    | 13 (18.6)            | 14 (20.0)          |                        |              |
| NYHA 分類            | I 度   | 45 (64.3)            | 49 (70.0)          | 0.47                   | 0.59         |
|                    | II 度  | 25 (35.7)            | 21 (30.0)          |                        |              |
|                    | III 度 | 0 (0.0)              | 0 (0.0)            |                        |              |
|                    | IV 度  | 0 (0.0)              | 0 (0.0)            |                        |              |
| 心不全の原疾患 / 虚血性心疾患   | あり    | 29 (41.4)            | 32 (45.7)          | 0.61                   | 0.73         |
| 心不全の原疾患 / 心筋症      | あり    | 18 (25.7)            | 13 (18.6)          | 0.31                   | 0.42         |
| 心不全の原疾患 / 弁膜症      | あり    | 12 (17.1)            | 12 (17.1)          | 1.00                   | 1.00         |
| 心不全の原疾患 / 高血圧性心不全  | あり    | 8 (11.4)             | 9 (12.9)           | 0.80                   | 1.00         |
| 心不全の原疾患 / その他の心不全  | あり    | 15 (21.4)            | 18 (25.7)          | 0.55                   | 0.69         |
| 治療歴                | あり    | 28 (40.0)            | 36 (51.4)          | 0.17                   | 0.23         |
| 治療歴 / CABG 歴       | あり    | 9 (12.9)             | 7 (10.0)           | 0.60                   | 0.79         |
| 治療歴 / 弁置換術あるいは弁形成術 | あり    | 5 (7.1)              | 9 (12.9)           | 0.26                   | 0.40         |
| 治療歴 / PCI 歴        | あり    | 20 (28.6)            | 23 (32.9)          | 0.58                   | 0.71         |
| 治療歴 / PCI 歴 / POBA | あり    | 5 (7.1)              | 5 (7.1)            | 1.00                   | 1.00         |
| 治療歴 / PCI 歴 / DES  | あり    | 9 (12.9)             | 12 (17.1)          | 0.48                   | 0.64         |
| 治療歴 / PCI 歴 / BMS  | あり    | 9 (12.9)             | 10 (14.3)          | 0.81                   | 1.00         |
| 治療歴 / PCI 歴 / DEB  | あり    | 0 (0.0)              | 0 (0.0)            | -                      | -            |
| 治療歴 / PCI 歴 / BVS  | あり    | 0 (0.0)              | 0 (0.0)            | -                      | -            |
| 治療歴 / PCI 歴 / その他  | あり    | 1 (1.4)              | 0 (0.0)            | 0.32*                  | 1.00         |
| 既往歴                | あり    | 26 (37.1)            | 27 (38.6)          | 0.86                   | 1.00         |
| 合併症                | あり    | 67 (95.7)            | 67 (95.7)          | 1.00*                  | 1.00         |
| 合併症 / 心房細動         | あり    | 30 (42.9)            | 28 (40.0)          | 0.73                   | 0.86         |
| 合併症 / その他不整脈       | あり    | 13 (18.6)            | 13 (18.6)          | 1.00                   | 1.00         |
| 合併症 / 細小血管合併症      | あり    | 1 (1.4)              | 1 (1.4)            | 1.00*                  | 1.00         |
| 合併症 / 腎疾患          | あり    | 19 (27.1)            | 13 (18.6)          | 0.23                   | 0.31         |
| 合併症 / 肝疾患          | あり    | 3 (4.3)              | 0 (0.0)            | 0.08*                  | 0.24         |
| 合併症 / 脳心血管系疾患      | あり    | 6 (8.6)              | 2 (2.9)            | 0.15*                  | 0.27         |
| 合併症 / 糖尿病          | あり    | 26 (37.1)            | 21 (30.0)          | 0.37                   | 0.47         |

### 3. 研究対象者背景

|             |    |           |           |       |       |
|-------------|----|-----------|-----------|-------|-------|
| 合併症 / 高血圧   | あり | 42 (60.0) | 55 (78.6) | 0.017 | 0.027 |
| 合併症 / 脂質異常症 | あり | 41 (58.6) | 41 (58.6) | 1.00  | 1.00  |
| 合併症 / 痛風発作  | あり | 1 (1.4)   | 2 (2.9)   | 0.56* | 1.00  |
| 合併症 / その他   | あり | 32 (45.7) | 27 (38.6) | 0.39  | 0.49  |

$\chi^2$  二乗検定の P 値において、アスタリスクがついているものは、 $\chi^2$  二乗検定の実施要件を満たしていないため、結果に信頼性がないことを示します。



3. 研究対象者背景  
心不全の原疾患 / その他の心不全 の詳細

表 3.3. [FAS] 心不全の原疾患 / その他の心不全 の詳細

| 変数                            | 症例数(%)            |                     | 群間比較 P 値        |              |
|-------------------------------|-------------------|---------------------|-----------------|--------------|
|                               | トピロキソスタット群 n = 70 | アロプリノー<br>ル群 n = 70 | $\chi$ 二乗<br>検定 | Fisher<br>検定 |
| 心不全の原疾患 / その他の心不全 / I 度房室ブロック | 1 (1.4)           | 0 (0.0)             | 0.32*           | 1.00         |
| 心不全の原疾患 / その他の心不全 / 拡張障害      | 1 (1.4)           | 0 (0.0)             | 0.32*           | 1.00         |
| 心不全の原疾患 / その他の心不全 / 収縮性心膜炎    | 1 (1.4)           | 1 (1.4)             | 1.00*           | 1.00         |
| 心不全の原疾患 / その他の心不全 / 徐脈        | 1 (1.4)           | 0 (0.0)             | 0.32*           | 1.00         |
| 心不全の原疾患 / その他の心不全 / 上室性期外収縮   | 0 (0.0)           | 1 (1.4)             | 0.32*           | 1.00         |
| 心不全の原疾患 / その他の心不全 / 心室期外収縮    | 0 (0.0)           | 3 (4.3)             | 0.08*           | 0.24         |
| 心不全の原疾患 / その他の心不全 / 心不全       | 1 (1.4)           | 0 (0.0)             | 0.32*           | 1.00         |
| 心不全の原疾患 / その他の心不全 / 心房細動      | 11 (15.7)         | 12 (17.1)           | 0.82            | 1.00         |
| 心不全の原疾患 / その他の心不全 / 心房粗動      | 0 (0.0)           | 1 (1.4)             | 0.32*           | 1.00         |
| 心不全の原疾患 / その他の心不全 / 肺血栓症      | 1 (1.4)           | 0 (0.0)             | 0.32*           | 1.00         |

$\chi$  二乗検定の P 値において、アスタリスクがついているものは、 $\chi$  二乗検定の実施要件を満たしていないため、結果に信頼性がないことを示します。

3. 研究対象者背景  
既往歴の詳細

表 3.4. [FAS] 既往歴の詳細

| 変数              | 症例数(%)               |                    | 群間比較 P 値         |              |
|-----------------|----------------------|--------------------|------------------|--------------|
|                 | トピロキソスタット群<br>n = 70 | アロプリノール群<br>n = 70 | $\chi^2$ 乗<br>検定 | Fisher<br>検定 |
| 既往歴 / ASD       | 1 (1.4)              | 0 (0.0)            | 0.32*            | 1.00         |
| 既往歴 / C 型肝炎     | 1 (1.4)              | 2 (2.9)            | 0.56*            | 1.00         |
| 既往歴 / S 状結腸癌    | 1 (1.4)              | 0 (0.0)            | 0.32*            | 1.00         |
| 既往歴 / アレルギー性鼻炎  | 0 (0.0)              | 1 (1.4)            | 0.32*            | 1.00         |
| 既往歴 / うつ病       | 1 (1.4)              | 0 (0.0)            | 0.32*            | 1.00         |
| 既往歴 / ダンピング症候群  | 1 (1.4)              | 0 (0.0)            | 0.32*            | 1.00         |
| 既往歴 / 胃癌        | 1 (1.4)              | 0 (0.0)            | 0.32*            | 1.00         |
| 既往歴 / 胃潰瘍       | 2 (2.9)              | 0 (0.0)            | 0.15*            | 0.50         |
| 既往歴 / 一過性脳虚血発作  | 1 (1.4)              | 0 (0.0)            | 0.32*            | 1.00         |
| 既往歴 / 肝機能障害     | 1 (1.4)              | 0 (0.0)            | 0.32*            | 1.00         |
| 既往歴 / 気管支喘息     | 1 (1.4)              | 2 (2.9)            | 0.56*            | 1.00         |
| 既往歴 / 逆流性食道炎    | 1 (1.4)              | 0 (0.0)            | 0.32*            | 1.00         |
| 既往歴 / 狭心症       | 1 (1.4)              | 0 (0.0)            | 0.32*            | 1.00         |
| 既往歴 / 胸部大動脈瘤    | 0 (0.0)              | 1 (1.4)            | 0.32*            | 1.00         |
| 既往歴 / 頚椎症性脊髄症   | 1 (1.4)              | 0 (0.0)            | 0.32*            | 1.00         |
| 既往歴 / 甲状腺機能低下症  | 0 (0.0)              | 1 (1.4)            | 0.32*            | 1.00         |
| 既往歴 / 甲状腺腫      | 0 (0.0)              | 1 (1.4)            | 0.32*            | 1.00         |
| 既往歴 / 高血圧       | 0 (0.0)              | 1 (1.4)            | 0.32*            | 1.00         |
| 既往歴 / 腰椎ヘルニア    | 0 (0.0)              | 1 (1.4)            | 0.32*            | 1.00         |
| 既往歴 / 腰部脊柱管狭窄症  | 1 (1.4)              | 0 (0.0)            | 0.32*            | 1.00         |
| 既往歴 / 左室心尖部壁在血栓 | 1 (1.4)              | 0 (0.0)            | 0.32*            | 1.00         |
| 既往歴 / 十二指腸潰瘍    | 1 (1.4)              | 0 (0.0)            | 0.32*            | 1.00         |
| 既往歴 / 縦隔腫瘍      | 0 (0.0)              | 1 (1.4)            | 0.32*            | 1.00         |
| 既往歴 / 徐脈性不整脈    | 0 (0.0)              | 1 (1.4)            | 0.32*            | 1.00         |
| 既往歴 / 消化管出血     | 1 (1.4)              | 0 (0.0)            | 0.32*            | 1.00         |
| 既往歴 / 硝子体出血     | 0 (0.0)              | 1 (1.4)            | 0.32*            | 1.00         |
| 既往歴 / 心原性脳塞栓症   | 1 (1.4)              | 0 (0.0)            | 0.32*            | 1.00         |
| 既往歴 / 心室細動・心室頻拍 | 0 (0.0)              | 1 (1.4)            | 0.32*            | 1.00         |
| 既往歴 / 心室性期外収縮   | 0 (0.0)              | 1 (1.4)            | 0.32*            | 1.00         |
| 既往歴 / 心臓粘液腫     | 1 (1.4)              | 0 (0.0)            | 0.32*            | 1.00         |
| 既往歴 / 心内血栓      | 1 (1.4)              | 0 (0.0)            | 0.32*            | 1.00         |
| 既往歴 / 心不全       | 1 (1.4)              | 0 (0.0)            | 0.32*            | 1.00         |
| 既往歴 / 心房細動      | 1 (1.4)              | 0 (0.0)            | 0.32*            | 1.00         |
| 既往歴 / 心房粗動      | 1 (1.4)              | 0 (0.0)            | 0.32*            | 1.00         |
| 既往歴 / 深部静脈血栓症   | 0 (0.0)              | 1 (1.4)            | 0.32*            | 1.00         |
| 既往歴 / 腎結石       | 1 (1.4)              | 0 (0.0)            | 0.32*            | 1.00         |
| 既往歴 / 水晶体再建術    | 1 (1.4)              | 0 (0.0)            | 0.32*            | 1.00         |
| 既往歴 / 水腎症       | 1 (1.4)              | 0 (0.0)            | 0.32*            | 1.00         |
| 既往歴 / 睡眠時無呼吸症候群 | 1 (1.4)              | 0 (0.0)            | 0.32*            | 1.00         |
| 既往歴 / 前立腺癌      | 1 (1.4)              | 1 (1.4)            | 1.00*            | 1.00         |
| 既往歴 / 前立腺肥大症    | 1 (1.4)              | 0 (0.0)            | 0.32*            | 1.00         |
| 既往歴 / 鼠径ヘルニア    | 1 (1.4)              | 0 (0.0)            | 0.32*            | 1.00         |
| 既往歴 / 僧帽弁閉鎖不全症  | 0 (0.0)              | 1 (1.4)            | 0.32*            | 1.00         |

3. 研究対象者背景  
既往歴の詳細

|                 |         |          |       |      |
|-----------------|---------|----------|-------|------|
| 既往歴 / 大腿骨頸部骨折   | 1 (1.4) | 0 (0.0)  | 0.32* | 1.00 |
| 既往歴 / 大腸ポリープ    | 1 (1.4) | 0 (0.0)  | 0.32* | 1.00 |
| 既往歴 / 大腸癌       | 1 (1.4) | 0 (0.0)  | 0.32* | 1.00 |
| 既往歴 / 大動脈弁閉鎖不全症 | 0 (0.0) | 2 (2.9)  | 0.15* | 0.50 |
| 既往歴 / 大動脈弁輪拡張症  | 0 (0.0) | 1 (1.4)  | 0.32* | 1.00 |
| 既往歴 / 胆のう炎      | 1 (1.4) | 0 (0.0)  | 0.32* | 1.00 |
| 既往歴 / 胆石        | 0 (0.0) | 1 (1.4)  | 0.32* | 1.00 |
| 既往歴 / 蓄膿症       | 0 (0.0) | 1 (1.4)  | 0.32* | 1.00 |
| 既往歴 / 中咽頭腫瘍     | 0 (0.0) | 1 (1.4)  | 0.32* | 1.00 |
| 既往歴 / 虫垂炎       | 2 (2.9) | 0 (0.0)  | 0.15* | 0.50 |
| 既往歴 / 直腸癌       | 0 (0.0) | 1 (1.4)  | 0.32* | 1.00 |
| 既往歴 / 陳旧性心筋梗塞   | 2 (2.9) | 2 (2.9)  | 1.00* | 1.00 |
| 既往歴 / 糖尿病       | 0 (0.0) | 1 (1.4)  | 0.32* | 1.00 |
| 既往歴 / 頭部外傷・脳挫傷  | 1 (1.4) | 0 (0.0)  | 0.32* | 1.00 |
| 既往歴 / 洞不全症候群    | 0 (0.0) | 1 (1.4)  | 0.32* | 1.00 |
| 既往歴 / 乳癌        | 1 (1.4) | 0 (0.0)  | 0.32* | 1.00 |
| 既往歴 / 尿管結石      | 2 (2.9) | 0 (0.0)  | 0.15* | 0.50 |
| 既往歴 / 脳梗塞       | 4 (5.7) | 7 (10.0) | 0.35  | 0.53 |
| 既往歴 / 脳出血       | 0 (0.0) | 1 (1.4)  | 0.32* | 1.00 |
| 既往歴 / 脳動脈瘤      | 1 (1.4) | 0 (0.0)  | 0.32* | 1.00 |
| 既往歴 / 肺結核       | 0 (0.0) | 1 (1.4)  | 0.32* | 1.00 |
| 既往歴 / 頻脈        | 1 (1.4) | 0 (0.0)  | 0.32* | 1.00 |
| 既往歴 / 変形性股関節症   | 0 (0.0) | 1 (1.4)  | 0.32* | 1.00 |
| 既往歴 / 変形性腰椎症    | 0 (0.0) | 1 (1.4)  | 0.32* | 1.00 |
| 既往歴 / 変形性膝関節症   | 1 (1.4) | 0 (0.0)  | 0.32* | 1.00 |
| 既往歴 / 慢性硬膜下血腫   | 2 (2.9) | 0 (0.0)  | 0.15* | 0.50 |
| 既往歴 / 睇炎        | 0 (0.0) | 1 (1.4)  | 0.32* | 1.00 |
| 既往歴 / 蕁麻疹       | 1 (1.4) | 0 (0.0)  | 0.32* | 1.00 |

$\chi^2$  乗検定の P 値において、アスタリスクがついているものは、 $\chi^2$  乗検定の実施要件を満たしていないため、結果に信頼性がないことを示します。

3. 研究対象者背景  
各合併症の詳細

表 3.5. [FAS] 各合併症の詳細

| 変数                        | 症例数(%)                |                    | 群間比較 P 値         |              |
|---------------------------|-----------------------|--------------------|------------------|--------------|
|                           | トピロキシostat群<br>n = 70 | アロプリノール群<br>n = 70 | $\chi^2$ 乗<br>検定 | Fisher<br>検定 |
| 合併症 / その他不整脈 / WPW 症候群    | 1 (1.4)               | 0 (0.0)            | 0.32*            | 1.00         |
| 合併症 / その他不整脈 / 完全房室ブロック   | 1 (1.4)               | 0 (0.0)            | 0.32*            | 1.00         |
| 合併症 / その他不整脈 / 徐脈         | 1 (1.4)               | 0 (0.0)            | 0.32*            | 1.00         |
| 合併症 / その他不整脈 / 上室性期外収縮    | 1 (1.4)               | 0 (0.0)            | 0.32*            | 1.00         |
| 合併症 / その他不整脈 / 心室期外収縮     | 5 (7.1)               | 9 (12.9)           | 0.26             | 0.40         |
| 合併症 / その他不整脈 / 心室頻拍       | 3 (4.3)               | 3 (4.3)            | 1.00*            | 1.00         |
| 合併症 / その他不整脈 / 心房粗動       | 1 (1.4)               | 0 (0.0)            | 0.32*            | 1.00         |
| 合併症 / その他不整脈 / 洞性徐脈       | 0 (0.0)               | 1 (1.4)            | 0.32*            | 1.00         |
| 合併症 / その他不整脈 / 洞不全症候群     | 1 (1.4)               | 0 (0.0)            | 0.32*            | 1.00         |
| 合併症 / 細小血管合併症 / 糖尿病性網膜症   | 1 (1.4)               | 1 (1.4)            | 1.00*            | 1.00         |
| 合併症 / 腎疾患 / CKD           | 12 (17.1)             | 13 (18.6)          | 0.83             | 1.00         |
| 合併症 / 腎疾患 / 高血圧性腎疾患       | 1 (1.4)               | 0 (0.0)            | 0.32*            | 1.00         |
| 合併症 / 腎疾患 / 糸球体腎炎         | 0 (0.0)               | 1 (1.4)            | 0.32*            | 1.00         |
| 合併症 / 腎疾患 / 腎梗塞           | 1 (1.4)               | 0 (0.0)            | 0.32*            | 1.00         |
| 合併症 / 腎疾患 / 慢性腎不全         | 5 (7.1)               | 0 (0.0)            | 0.023*           | 0.06         |
| 合併症 / 肝疾患 / B 型肝炎         | 1 (1.4)               | 0 (0.0)            | 0.32*            | 1.00         |
| 合併症 / 肝疾患 / アルコール性肝障害     | 1 (1.4)               | 0 (0.0)            | 0.32*            | 1.00         |
| 合併症 / 肝疾患 / 肝機能障害         | 1 (1.4)               | 0 (0.0)            | 0.32*            | 1.00         |
| 合併症 / 脳心血管系疾患 / 狭心症       | 2 (2.9)               | 0 (0.0)            | 0.15*            | 0.50         |
| 合併症 / 脳心血管系疾患 / 心原性脳塞栓症   | 1 (1.4)               | 0 (0.0)            | 0.32*            | 1.00         |
| 合併症 / 脳心血管系疾患 / 大動脈弁閉鎖不全症 | 1 (1.4)               | 0 (0.0)            | 0.32*            | 1.00         |
| 合併症 / 脳心血管系疾患 / 陳旧性心筋梗塞   | 0 (0.0)               | 1 (1.4)            | 0.32*            | 1.00         |
| 合併症 / 脳心血管系疾患 / 内頸動脈狭窄症   | 1 (1.4)               | 0 (0.0)            | 0.32*            | 1.00         |
| 合併症 / 脳心血管系疾患 / 脳梗塞後遺症    | 0 (0.0)               | 1 (1.4)            | 0.32*            | 1.00         |
| 合併症 / 脳心血管系疾患 / 未破裂脳動脈瘤   | 1 (1.4)               | 0 (0.0)            | 0.32*            | 1.00         |
| 合併症 / その他 / COPD          | 1 (1.4)               | 3 (4.3)            | 0.31*            | 0.62         |
| 合併症 / その他 / leriche 症候群   | 0 (0.0)               | 1 (1.4)            | 0.32*            | 1.00         |
| 合併症 / その他 / アレルギー性皮膚炎     | 1 (1.4)               | 0 (0.0)            | 0.32*            | 1.00         |
| 合併症 / その他 / アレルギー性鼻炎      | 1 (1.4)               | 0 (0.0)            | 0.32*            | 1.00         |
| 合併症 / その他 / てんかん          | 4 (5.7)               | 0 (0.0)            | 0.042*           | 0.12         |
| 合併症 / その他 / レム睡眠行動異常症     | 1 (1.4)               | 0 (0.0)            | 0.32*            | 1.00         |
| 合併症 / その他 / 胃潰瘍           | 1 (1.4)               | 0 (0.0)            | 0.32*            | 1.00         |
| 合併症 / その他 / 下肢静脈瘤         | 1 (1.4)               | 0 (0.0)            | 0.32*            | 1.00         |
| 合併症 / その他 / 下肢閉塞性動脈硬化症    | 1 (1.4)               | 3 (4.3)            | 0.31*            | 0.62         |
| 合併症 / その他 / 加齢黄斑変性症       | 0 (0.0)               | 1 (1.4)            | 0.32*            | 1.00         |
| 合併症 / その他 / 感音難聴          | 0 (0.0)               | 1 (1.4)            | 0.32*            | 1.00         |
| 合併症 / その他 / 感冒            | 1 (1.4)               | 0 (0.0)            | 0.32*            | 1.00         |
| 合併症 / その他 / 間質性肺炎         | 0 (0.0)               | 1 (1.4)            | 0.32*            | 1.00         |
| 合併症 / その他 / 気管支喘息         | 1 (1.4)               | 1 (1.4)            | 1.00*            | 1.00         |
| 合併症 / その他 / 逆流性食道炎        | 3 (4.3)               | 2 (2.9)            | 0.65*            | 1.00         |
| 合併症 / その他 / 橋本病           | 0 (0.0)               | 1 (1.4)            | 0.32*            | 1.00         |
| 合併症 / その他 / 肩関節症          | 0 (0.0)               | 1 (1.4)            | 0.32*            | 1.00         |
| 合併症 / その他 / 甲状腺機能低下症      | 1 (1.4)               | 1 (1.4)            | 1.00*            | 1.00         |

3. 研究対象者背景  
各合併症の詳細

|                             |         |         |       |      |
|-----------------------------|---------|---------|-------|------|
| 合併症 / その他 / 甲状腺機能亢進症        | 2 (2.9) | 1 (1.4) | 0.56* | 1.00 |
| 合併症 / その他 / 高カリウム血症         | 0 (0.0) | 2 (2.9) | 0.15* | 0.50 |
| 合併症 / その他 / 高位正中神経麻痺        | 0 (0.0) | 1 (1.4) | 0.32* | 1.00 |
| 合併症 / その他 / 腰痛症             | 2 (2.9) | 1 (1.4) | 0.56* | 1.00 |
| 合併症 / その他 / 心身症             | 1 (1.4) | 1 (1.4) | 1.00* | 1.00 |
| 合併症 / その他 / 神経症             | 3 (4.3) | 0 (0.0) | 0.08* | 0.24 |
| 合併症 / その他 / 睡眠時無呼吸症候群       | 3 (4.3) | 1 (1.4) | 0.31* | 0.62 |
| 合併症 / その他 / 前立腺肥大           | 3 (4.3) | 3 (4.3) | 1.00* | 1.00 |
| 合併症 / その他 / 双極性障害           | 1 (1.4) | 0 (0.0) | 0.32* | 1.00 |
| 合併症 / その他 / 打ち身             | 1 (1.4) | 0 (0.0) | 0.32* | 1.00 |
| 合併症 / その他 / 胆石症             | 1 (1.4) | 0 (0.0) | 0.32* | 1.00 |
| 合併症 / その他 / 鉄欠乏性貧血          | 0 (0.0) | 3 (4.3) | 0.08* | 0.24 |
| 合併症 / その他 / 特発性レストレスレッグス症候群 | 1 (1.4) | 0 (0.0) | 0.32* | 1.00 |
| 合併症 / その他 / 認知症             | 0 (0.0) | 1 (1.4) | 0.32* | 1.00 |
| 合併症 / その他 / 白内障             | 1 (1.4) | 1 (1.4) | 1.00* | 1.00 |
| 合併症 / その他 / 不眠症             | 2 (2.9) | 1 (1.4) | 0.56* | 1.00 |
| 合併症 / その他 / 変形性膝関節症         | 0 (0.0) | 1 (1.4) | 0.32* | 1.00 |
| 合併症 / その他 / 便秘症             | 2 (2.9) | 2 (2.9) | 1.00* | 1.00 |
| 合併症 / その他 / 弁膜症             | 0 (0.0) | 1 (1.4) | 0.32* | 1.00 |
| 合併症 / その他 / 末梢性めまい          | 1 (1.4) | 0 (0.0) | 0.32* | 1.00 |
| 合併症 / その他 / 慢性萎縮性胃炎         | 1 (1.4) | 0 (0.0) | 0.32* | 1.00 |
| 合併症 / その他 / 慢性気管支炎          | 1 (1.4) | 0 (0.0) | 0.32* | 1.00 |
| 合併症 / その他 / 慢性閉塞性肺疾患        | 2 (2.9) | 0 (0.0) | 0.15* | 0.50 |
| 合併症 / その他 / 網膜格子状変性         | 0 (0.0) | 1 (1.4) | 0.32* | 1.00 |
| 合併症 / その他 / 緑内障             | 1 (1.4) | 0 (0.0) | 0.32* | 1.00 |

$\chi^2$  二乗検定の P 値において、アスタリスクがついているものは、 $\chi^2$  二乗検定の実施要件を満たしていないため、結果に信頼性がないことを示します。

4. 主要評価項目 (NT-proBNP 24 週変化率)

4.1. FAS

4. 主要評価項目

4.1. FAS

表 4.1.1. [FAS] 要約統計量と t 検定、Wilcoxon 検定

| 変数                                |     | 観察<br>ポイント | 統計量                       | トピロキソスタット群      | アロプリノール群         | 群間比較<br>P 値 |
|-----------------------------------|-----|------------|---------------------------|-----------------|------------------|-------------|
| 対数変換<br>NT-proBNP<br>(ln (pg/mL)) | 測定値 | 24 週       | n                         | 66              | 66               |             |
|                                   |     |            | Mean ± SD                 | 6.5 ± 0.9       | 6.3 ± 1.0        | 0.16        |
|                                   |     |            | Median [Q1, Q3]           | 6.4 [5.9, 7.2]  | 6.2 [5.5, 7.0]   | 0.14        |
|                                   |     |            | Min, Max                  | 4.7, 8.9        | 4.2, 9.4         |             |
|                                   | 変化率 | 24 週       | n                         | 66              | 66               |             |
|                                   |     |            | Mean ± SD                 | 1.6 ± 8.2       | -0.4 ± 8.0       | 0.17        |
|                                   |     |            | Median [Q1, Q3]           | 0.4 [-3.1, 4.6] | -0.4 [-4.3, 5.0] | 0.42        |
|                                   |     |            | Min, Max                  | -15.5, 30.5     | -27.6, 16.9      |             |
|                                   |     |            | One-sample t-test         | 0.13            | 0.69             |             |
|                                   |     |            | Wilcoxon signed-rank test | 0.29            | 0.92             |             |

表 4.1.2. [FAS] 共分散分析

| 変数                                |     | 観察<br>ポイント | n   | 調整済み平均値 (SE) |            | 調整済み平均値<br>の差 (95%CI) | 群間比較<br>P 値 |
|-----------------------------------|-----|------------|-----|--------------|------------|-----------------------|-------------|
|                                   |     |            |     | トピロキソスタット群   | アロプリノール群   |                       |             |
| 対数変換<br>NT-proBNP<br>(ln (pg/mL)) | 変化率 | 24 週       | 132 | 0.6 (1.1)    | -1.2 (1.1) | 1.8 (-1.0, 4.6)       | 0.20        |

群を固定効果、割付調整因子 (BNP 200 pg/ml 未満 / 200 pg/ml 以上、心臓超音波検査 EF 45% 未満 / 45% 以上) を共変量とした共分散分析を実施。

表 4.1.3. [FAS] MMRM

| 変数                                |     | 観察<br>ポイント | n   | 調整済み平均値 (SE) |            | 調整済み平均値<br>の差 (95%CI) | 群間比較<br>P 値 |
|-----------------------------------|-----|------------|-----|--------------|------------|-----------------------|-------------|
|                                   |     |            |     | トピロキソスタット群   | アロプリノール群   |                       |             |
| 対数変換<br>NT-proBNP<br>(ln (pg/mL)) | 変化率 | 24 週       | 137 | 1.1 (1.1)    | -0.5 (1.1) | 1.6 (-1.2, 4.5)       | 0.25        |

群および時期効果、群と時期の交互作用、割付調整因子 (BNP 200 pg/ml 未満 / 200 pg/ml 以上、心臓超音波検査 EF 45% 未満 / 45% 以上) を固定効果、研究対象者を変量効果としたモデルにて MMRM を実施。

4. 主要評価項目 (NT-proBNP 24 週変化率)

4.2. PPS

4.2. PPS

表 4.2.1. [PPS] 要約統計量と t 検定、Wilcoxon 検定

| 変数                          |     | 観察ポイント | 統計量                       | トピロキソスタット群      | アロプリノール群        | 群間比較 P 値 |
|-----------------------------|-----|--------|---------------------------|-----------------|-----------------|----------|
| 対数変換 NT-proBNP (ln (pg/mL)) | 測定値 | 24 週   | n                         | 61              | 63              |          |
|                             |     |        | Mean ± SD                 | 6.5 ± 0.9       | 6.3 ± 1.0       | 0.33     |
|                             |     |        | Median [Q1, Q3]           | 6.4 [5.9, 7.1]  | 6.2 [5.5, 7.0]  | 0.24     |
|                             |     |        | Min, Max                  | 4.7, 8.4        | 4.6, 9.4        |          |
|                             | 変化率 | 24 週   | n                         | 61              | 63              |          |
|                             |     |        | Mean ± SD                 | 1.3 ± 8.1       | 0.1 ± 7.6       | 0.39     |
|                             |     |        | Median [Q1, Q3]           | 0.3 [-2.8, 4.1] | 0.5 [-4.0, 5.0] | 0.71     |
|                             |     |        | Min, Max                  | -15.5, 30.5     | -27.6, 16.9     |          |
|                             |     |        | One-sample t-test         | 0.21            | 0.93            |          |
|                             |     |        | Wilcoxon signed-rank test | 0.37            | 0.62            |          |

表 4.2.2. [PPS] 共分散分析

| 変数                          |     | 観察ポイント | n   | 調整済み平均値 (SE) |            | 調整済み平均値の差 (95%CI) | 群間比較 P 値 |
|-----------------------------|-----|--------|-----|--------------|------------|-------------------|----------|
|                             |     |        |     | トピロキソスタット群   | アロプリノール群   |                   |          |
| 対数変換 NT-proBNP (ln (pg/mL)) | 変化率 | 24 週   | 124 | 0.4 (1.2)    | -0.8 (1.1) | 1.1 (-1.6, 3.9)   | 0.42     |

群を固定効果、割付調整因子 (BNP 200 pg/ml 未満 / 200 pg/ml 以上、心臓超音波検査 EF 45% 未満 / 45% 以上) を共変量とした共分散分析を実施。

表 4.2.3. [PPS] MMRM

| 変数                          |     | 観察ポイント | n   | 調整済み平均値 (SE) |            | 調整済み平均値の差 (95%CI) | 群間比較 P 値 |
|-----------------------------|-----|--------|-----|--------------|------------|-------------------|----------|
|                             |     |        |     | トピロキソスタット群   | アロプリノール群   |                   |          |
| 対数変換 NT-proBNP (ln (pg/mL)) | 変化率 | 24 週   | 129 | 0.9 (1.1)    | -0.2 (1.1) | 1.2 (-1.7, 4.0)   | 0.42     |

群および時期効果、群と時期の交互作用、割付調整因子 (BNP 200 pg/ml 未満 / 200 pg/ml 以上、心臓超音波検査 EF 45% 未満 / 45% 以上) を固定効果、研究対象者を変量効果としたモデルにて MMRM を実施。

## 5. 副次評価項目

### 5.1. FAS

主要評価項目以外も含めた NT-proBNP

## 5. 副次評価項目

副次評価項目のうち、以下の特殊血液検査項目はデータが収集されなかったため解析結果に含まない。

- ・ 炎症バイオマーカー (IL-1 $\beta$ 、IL6、IL8、IL-12、IFN- $\gamma$ 、SDF1 $\alpha$ 、TNF $\alpha$ 、MCP-1)、FACS、EPC (CD34+/CD133+/CD45low+)、EPC (CD34+/KDR)、d-ROMs、BAP、トロポニン I

### 5.1. FAS

表 5.1.1. [FAS] 24 週変化率以外も含めた NT-proBNP

| 変数                                |      | 観察ポイント                    | 統計量                       | トピロキソスタット群          | アロプリノール群            | 群間比較 P 値 |
|-----------------------------------|------|---------------------------|---------------------------|---------------------|---------------------|----------|
| 対数変換<br>NT-proBNP<br>(ln (pg/mL)) | 測定値  | 0 週                       | n                         | 70                  | 70                  |          |
|                                   |      |                           | Mean $\pm$ SD             | 6.56 $\pm$ 1.02     | 6.36 $\pm$ 0.90     | 0.23     |
|                                   |      |                           | Median [Q1, Q3]           | 6.46 [5.78, 7.22]   | 6.34 [5.75, 7.06]   | 0.33     |
|                                   |      |                           | Min, Max                  | 4.68, 10.22         | 4.58, 8.77          |          |
|                                   |      | 12 週                      | n                         | 65                  | 68                  |          |
|                                   |      |                           | Mean $\pm$ SD             | 6.53 $\pm$ 0.94     | 6.32 $\pm$ 1.04     | 0.23     |
|                                   |      |                           | Median [Q1, Q3]           | 6.43 [5.84, 7.27]   | 6.45 [5.53, 7.02]   | 0.36     |
|                                   |      |                           | Min, Max                  | 4.62, 9.17          | 4.35, 9.53          |          |
|                                   |      | 24 週                      | n                         | 66                  | 66                  |          |
|                                   |      |                           | Mean $\pm$ SD             | 6.53 $\pm$ 0.90     | 6.29 $\pm$ 1.03     | 0.16     |
|                                   |      |                           | Median [Q1, Q3]           | 6.36 [5.92, 7.20]   | 6.20 [5.52, 7.01]   | 0.14     |
|                                   |      |                           | Min, Max                  | 4.70, 8.86          | 4.23, 9.36          |          |
|                                   | 変化量  | 12 週                      | n                         | 65                  | 68                  |          |
|                                   |      |                           | Mean $\pm$ SD             | 0.05 $\pm$ 0.44     | -0.01 $\pm$ 0.45    | 0.50     |
|                                   |      |                           | Median [Q1, Q3]           | -0.03 [-0.20, 0.34] | -0.02 [-0.30, 0.30] | 0.41     |
|                                   |      |                           | Min, Max                  | -1.05, 1.31         | -1.10, 1.91         |          |
|                                   |      |                           | One-sample t-test         | 0.41                | 0.89                |          |
|                                   |      |                           | Wilcoxon signed-rank test | 0.48                | 0.69                |          |
|                                   |      | 24 週                      | n                         | 66                  | 66                  |          |
|                                   |      |                           | Mean $\pm$ SD             | 0.08 $\pm$ 0.48     | -0.03 $\pm$ 0.51    | 0.22     |
|                                   |      |                           | Median [Q1, Q3]           | 0.02 [-0.23, 0.27]  | -0.03 [-0.24, 0.28] | 0.47     |
|                                   |      |                           | Min, Max                  | -0.87, 1.53         | -1.77, 1.06         |          |
|                                   |      |                           | One-sample t-test         | 0.18                | 0.66                |          |
|                                   |      |                           | Wilcoxon signed-rank test | 0.32                | 0.98                |          |
| 変化率                               | 12 週 | n                         | 65                        | 68                  |                     |          |
|                                   |      | Mean $\pm$ SD             | 1.0 $\pm$ 7.0             | -0.3 $\pm$ 7.1      | 0.28                |          |
|                                   |      | Median [Q1, Q3]           | -0.4 [-3.5, 5.8]          | -0.3 [-4.5, 4.8]    | 0.36                |          |
|                                   |      | Min, Max                  | -14.3, 24.2               | -17.3, 25.2         |                     |          |
|                                   |      | One-sample t-test         | 0.24                      | 0.74                |                     |          |
|                                   |      | Wilcoxon signed-rank test | 0.42                      | 0.70                |                     |          |
|                                   | 24 週 | n                         | 66                        | 66                  |                     |          |
|                                   |      | Mean $\pm$ SD             | 1.6 $\pm$ 8.2             | -0.4 $\pm$ 8.0      | 0.17                |          |
|                                   |      | Median [Q1, Q3]           | 0.4 [-3.1, 4.6]           | -0.4 [-4.3, 5.0]    | 0.42                |          |
|                                   |      | Min, Max                  | -15.5, 30.5               | -27.6, 16.9         |                     |          |
|                                   |      | One-sample t-test         | 0.13                      | 0.69                |                     |          |
|                                   |      | Wilcoxon signed-rank test | 0.29                      | 0.92                |                     |          |



## 5. 副次評価項目

## 5.1. FAS

## BNP

表 5.1.2. [FAS] BNP

| 変数                       | 観察<br>ポイント | 統計量                       | トピロキソスタット群                | アロプリノール群           | 群間比較<br>P 値        |      |
|--------------------------|------------|---------------------------|---------------------------|--------------------|--------------------|------|
| 対数変換 BNP<br>(ln (pg/mL)) | 測定値        | 0 週                       | n                         | 69                 | 69                 |      |
|                          |            |                           | Mean ±SD                  | 4.99 ±0.79         | 4.83 ±0.67         | 0.21 |
|                          |            |                           | Median [Q1, Q3]           | 4.85 [4.44, 5.53]  | 4.84 [4.39, 5.25]  | 0.38 |
|                          |            |                           | Min, Max                  | 3.33, 7.47         | 3.18, 6.52         |      |
|                          |            | 12 週                      | n                         | 68                 | 70                 |      |
|                          |            |                           | Mean ±SD                  | 5.01 ±0.76         | 4.84 ±0.87         | 0.24 |
|                          |            |                           | Median [Q1, Q3]           | 4.87 [4.53, 5.36]  | 4.95 [4.28, 5.35]  | 0.43 |
|                          |            |                           | Min, Max                  | 3.03, 7.22         | 2.79, 7.25         |      |
|                          |            | 24 週                      | n                         | 66                 | 67                 |      |
|                          |            |                           | Mean ±SD                  | 4.97 ±0.76         | 4.82 ±0.81         | 0.27 |
|                          |            |                           | Median [Q1, Q3]           | 4.95 [4.57, 5.40]  | 4.87 [4.24, 5.39]  | 0.37 |
|                          |            |                           | Min, Max                  | 2.65, 7.15         | 3.10, 6.98         |      |
|                          | 変化量        | 12 週                      | n                         | 67                 | 69                 |      |
|                          |            |                           | Mean ±SD                  | 0.02 ±0.45         | 0.01 ±0.52         | 0.84 |
|                          |            |                           | Median [Q1, Q3]           | 0.06 [-0.22, 0.27] | 0.00 [-0.32, 0.31] | 0.51 |
|                          |            |                           | Min, Max                  | -1.29, 1.13        | -1.04, 1.72        |      |
|                          |            |                           | One-sample t-test         | 0.65               | 0.91               |      |
|                          |            |                           | Wilcoxon signed-rank test | 0.52               | 0.83               |      |
|                          |            | 24 週                      | n                         | 65                 | 66                 |      |
|                          |            |                           | Mean ±SD                  | 0.06 ±0.55         | -0.02 ±0.53        | 0.43 |
|                          |            |                           | Median [Q1, Q3]           | 0.07 [-0.26, 0.31] | 0.04 [-0.20, 0.27] | 0.74 |
|                          |            |                           | Min, Max                  | -1.68, 1.57        | -1.87, 1.33        |      |
|                          |            |                           | One-sample t-test         | 0.40               | 0.80               |      |
|                          |            |                           | Wilcoxon signed-rank test | 0.36               | 0.65               |      |
| 変化率                      | 12 週       | n                         | 67                        | 69                 |                    |      |
|                          |            | Mean ±SD                  | 1.1 ±9.7                  | 0.0 ±10.7          | 0.55               |      |
|                          |            | Median [Q1, Q3]           | 1.0 [-4.1, 5.8]           | 0.1 [-6.4, 6.2]    | 0.46               |      |
|                          |            | Min, Max                  | -29.9, 32.2               | -22.5, 33.9        |                    |      |
|                          |            | One-sample t-test         | 0.36                      | 0.98               |                    |      |
|                          |            | Wilcoxon signed-rank test | 0.39                      | 0.83               |                    |      |
|                          | 24 週       | n                         | 65                        | 66                 |                    |      |
|                          |            | Mean ±SD                  | 1.7 ±12.3                 | -0.2 ±10.8         | 0.34               |      |
|                          |            | Median [Q1, Q3]           | 1.4 [-5.0, 6.8]           | 0.7 [-4.9, 5.2]    | 0.65               |      |
|                          |            | Min, Max                  | -38.8, 40.3               | -36.1, 23.5        |                    |      |
|                          |            | One-sample t-test         | 0.26                      | 0.88               |                    |      |
|                          |            | Wilcoxon signed-rank test | 0.32                      | 0.68               |                    |      |

5. 副次評価項目

5.1. FAS

NT-proBNP の変化率と BNP 変化率の相関

表 5.1.3. [FAS] NT-proBNP の変化率と BNP 変化率の相関

| 変数 1                                   | 変数 2                             | n   | Pearson           |        | Spearman          |        |
|----------------------------------------|----------------------------------|-----|-------------------|--------|-------------------|--------|
|                                        |                                  |     | 相関係数<br>(95%CI)   | P 値    | 相関係数<br>(95%CI)   | P 値    |
| 対数変換 NT-proBNP<br>(ln (pg/mL)) 12 週変化率 | 対数変換 BNP<br>(ln (pg/mL)) 12 週変化率 | 130 | 0.75 (0.66, 0.81) | <0.001 | 0.69 (0.59, 0.77) | <0.001 |
| 対数変換 NT-proBNP<br>(ln (pg/mL)) 24 週変化率 | 対数変換 BNP<br>(ln (pg/mL)) 24 週変化率 | 130 | 0.84 (0.77, 0.88) | <0.001 | 0.72 (0.63, 0.79) | <0.001 |

## 5. 副次評価項目

## 5.1. FAS

## FMD

表 5.1.4. [FAS] FMD

| 変数      |     | 観察<br>ポイント | 統計量                       | トピロキソスタット群         | アロプリノール群            | 群間比較<br>P 値 |
|---------|-----|------------|---------------------------|--------------------|---------------------|-------------|
| FMD (%) | 測定値 | 0 週        | n                         | 49                 | 50                  |             |
|         |     |            | Mean ± SD                 | 4.77 ± 2.37        | 4.49 ± 2.14         | 0.53        |
|         |     |            | Median [Q1, Q3]           | 4.60 [3.00, 5.80]  | 4.50 [2.90, 5.50]   | 0.74        |
|         |     |            | Min, Max                  | 1.10, 11.50        | 1.10, 10.80         |             |
|         |     | 24 週       | n                         | 48                 | 48                  |             |
|         |     |            | Mean ± SD                 | 4.89 ± 2.41        | 4.22 ± 1.58         | 0.11        |
|         |     |            | Median [Q1, Q3]           | 4.15 [3.45, 6.10]  | 4.00 [3.20, 5.20]   | 0.28        |
|         |     |            | Min, Max                  | 1.30, 12.60        | 1.20, 9.20          |             |
|         | 変化量 | 24 週       | n                         | 47                 | 47                  |             |
|         |     |            | Mean ± SD                 | 0.04 ± 1.81        | -0.27 ± 1.39        | 0.35        |
|         |     |            | Median [Q1, Q3]           | 0.30 [-0.80, 1.10] | -0.20 [-0.90, 0.50] | 0.17        |
|         |     |            | Min, Max                  | -6.60, 4.40        | -5.60, 2.40         |             |
|         |     |            | One-sample t-test         | 0.87               | 0.19                |             |
|         |     |            | Wilcoxon signed-rank test | 0.47               | 0.21                |             |

## 5. 副次評価項目

## 5.1. FAS

## EndoPAT

表 5.1.5. [FAS] EndoPAT

| 変数                        |      | 観察<br>ポイント | 統計量               | トピロキソスタット群          | アロプリノール群            | 群間比較<br>P 値 |
|---------------------------|------|------------|-------------------|---------------------|---------------------|-------------|
| EndoPAT (RHI<br>指数)       | 測定値  | 0 週        | n                 | 68                  | 68                  |             |
|                           |      |            | Mean ± SD         | 1.76 ± 0.56         | 1.80 ± 0.65         | 0.69        |
|                           |      |            | Median [Q1, Q3]   | 1.64 [1.39, 2.03]   | 1.67 [1.44, 1.96]   | 0.73        |
|                           |      |            | Min, Max          | 0.92, 3.66          | 0.75, 4.56          |             |
|                           |      | 24 週       | n                 | 65                  | 63                  |             |
|                           |      |            | Mean ± SD         | 1.74 ± 0.50         | 1.79 ± 0.57         | 0.58        |
|                           |      |            | Median [Q1, Q3]   | 1.62 [1.39, 1.93]   | 1.70 [1.39, 2.02]   | 0.65        |
|                           |      |            | Min, Max          | 0.78, 2.87          | 0.86, 3.52          |             |
|                           | 変化量  | 24 週       | n                 | 64                  | 62                  |             |
|                           |      |            | Mean ± SD         | -0.04 ± 0.47        | -0.01 ± 0.66        | 0.78        |
|                           |      |            | Median [Q1, Q3]   | -0.02 [-0.25, 0.21] | -0.04 [-0.31, 0.31] | 0.92        |
|                           |      |            | Min, Max          | -1.52, 0.98         | -2.48, 1.66         |             |
|                           |      |            | One-sample t-test | 0.50                | 0.89                |             |
| Wilcoxon signed-rank test | 0.55 | 0.90       |                   |                     |                     |             |

5. 副次評価項目

5.1. FAS

FMD の変化量と EndoPAT の変化量の相関

表 5.1.6. [FAS] FMD の変化量と EndoPAT の変化量の相関

| 変数 1            | 変数 2                        | n  | Pearson            |      | Spearman           |      |
|-----------------|-----------------------------|----|--------------------|------|--------------------|------|
|                 |                             |    | 相関係数<br>(95%CI)    | P 値  | 相関係数<br>(95%CI)    | P 値  |
| FMD (%) 24 週変化量 | EndoPAT (RHI 指数)<br>24 週変化量 | 94 | 0.09 (-0.11, 0.29) | 0.37 | 0.12 (-0.09, 0.31) | 0.27 |

## 5. 副次評価項目

## 5.1. FAS

## 血中尿酸値

表 5.1.7. [FAS] 血中尿酸値

| 変数                        | 観察<br>ポイント | 統計量             | トピロキソスタット群                | アロプリノール群          | 群間比較<br>P 値       |       |
|---------------------------|------------|-----------------|---------------------------|-------------------|-------------------|-------|
| 血中尿酸値<br>(mg/dL)          | 測定値        | 0 週             | n                         | 69                | 69                |       |
|                           |            | Mean ± SD       | 8.3 ± 1.4                 | 8.2 ± 1.4         | 0.63              |       |
|                           |            | Median [Q1, Q3] | 8.0 [7.2, 9.1]            | 7.9 [7.3, 8.7]    | 0.71              |       |
|                           |            | Min, Max        | 5.7, 11.9                 | 5.4, 12.4         |                   |       |
|                           |            | 12 週            | n                         | 69                | 70                |       |
|                           |            | Mean ± SD       | 5.4 ± 1.1                 | 5.9 ± 1.1         | 0.033             |       |
|                           |            | Median [Q1, Q3] | 5.5 [4.9, 6.1]            | 5.9 [5.1, 6.4]    | 0.031             |       |
|                           |            | Min, Max        | 3.2, 8.7                  | 3.6, 9.0          |                   |       |
|                           |            | 24 週            | n                         | 66                | 67                |       |
|                           |            | Mean ± SD       | 5.6 ± 1.2                 | 5.9 ± 1.2         | 0.10              |       |
|                           |            | Median [Q1, Q3] | 5.5 [4.6, 6.6]            | 6.0 [5.1, 6.4]    | 0.18              |       |
|                           |            | Min, Max        | 3.1, 7.8                  | 3.1, 9.7          |                   |       |
|                           | 変化量        | 12 週            | n                         | 68                | 69                |       |
|                           |            |                 | Mean ± SD                 | -2.8 ± 1.2        | -2.3 ± 1.3        | 0.023 |
|                           |            |                 | Median [Q1, Q3]           | -2.6 [-3.7, -1.9] | -2.1 [-2.9, -1.5] | 0.024 |
|                           |            |                 | Min, Max                  | -5.5, -0.9        | -6.2, 0.7         |       |
|                           |            |                 | One-sample t-test         | <0.001            | <0.001            |       |
|                           |            |                 | Wilcoxon signed-rank test | <0.001            | <0.001            |       |
|                           |            | 24 週            | n                         | 65                | 66                |       |
|                           |            |                 | Mean ± SD                 | -2.6 ± 1.5        | -2.2 ± 1.3        | 0.08  |
| Median [Q1, Q3]           |            |                 | -2.5 [-3.7, -1.8]         | -2.1 [-3.1, -1.4] | 0.05              |       |
| Min, Max                  |            |                 | -6.6, 0.6                 | -5.7, 1.2         |                   |       |
| One-sample t-test         | <0.001     | <0.001          |                           |                   |                   |       |
| Wilcoxon signed-rank test | <0.001     | <0.001          |                           |                   |                   |       |

5. 副次評価項目  
5.1. FAS  
バイタルサイン、一般血液・尿検査

表 5.1.8. [FAS] バイタルサイン、一般血液・尿検査

| 変数                        | 観察ポイント          | 統計量             | トピロキソスタット群                | アロプリノール群          | 群間比較 P 値          |      |
|---------------------------|-----------------|-----------------|---------------------------|-------------------|-------------------|------|
| 体重 (kg)                   | 測定値             | 0 週             | n                         | 70                | 70                |      |
|                           |                 |                 | Mean ±SD                  | 67.0 ± 13.7       | 66.3 ± 12.7       | 0.74 |
|                           |                 |                 | Median [Q1, Q3]           | 64.0 [56.0, 74.0] | 66.0 [59.8, 74.0] | 0.99 |
|                           |                 |                 | Min, Max                  | 44.5, 107.6       | 41.0, 104.0       |      |
|                           |                 | 12 週            | n                         | 62                | 65                |      |
|                           |                 |                 | Mean ±SD                  | 66.7 ± 13.8       | 66.2 ± 12.9       | 0.81 |
|                           |                 |                 | Median [Q1, Q3]           | 64.3 [57.8, 75.0] | 65.0 [59.7, 73.3] | 0.94 |
|                           |                 |                 | Min, Max                  | 42.0, 111.0       | 44.0, 108.0       |      |
|                           |                 | 24 週            | n                         | 64                | 66                |      |
|                           |                 |                 | Mean ±SD                  | 67.2 ± 14.1       | 65.7 ± 14.1       | 0.53 |
|                           |                 |                 | Median [Q1, Q3]           | 65.4 [57.9, 76.0] | 64.0 [59.0, 74.0] | 0.65 |
|                           |                 |                 | Min, Max                  | 42.0, 113.9       | 37.8, 110.0       |      |
|                           | 変化量             | 12 週            | n                         | 62                | 65                |      |
|                           |                 |                 | Mean ±SD                  | 0.1 ± 2.4         | -0.4 ± 4.4        | 0.44 |
|                           |                 |                 | Median [Q1, Q3]           | 0.0 [-1.0, 1.0]   | 0.0 [-0.5, 1.0]   | 0.84 |
|                           |                 |                 | Min, Max                  | -8.6, 8.0         | -30.0, 6.9        |      |
|                           |                 |                 | One-sample t-test         | 0.80              | 0.45              |      |
|                           |                 |                 | Wilcoxon signed-rank test | 0.91              | 0.66              |      |
|                           |                 | 24 週            | n                         | 64                | 66                |      |
|                           |                 |                 | Mean ±SD                  | 0.2 ± 2.5         | -0.7 ± 5.1        | 0.20 |
| Median [Q1, Q3]           |                 |                 | 0.0 [-1.6, 1.4]           | 0.0 [-1.6, 1.2]   | 0.51              |      |
| Min, Max                  |                 |                 | -6.0, 8.0                 | -31.0, 11.6       |                   |      |
| One-sample t-test         |                 |                 | 0.49                      | 0.27              |                   |      |
| Wilcoxon signed-rank test |                 |                 | 0.68                      | 0.64              |                   |      |
| BMI (kg/m <sup>2</sup> )  | 測定値             | 0 週             | n                         | 70                | 70                |      |
|                           |                 |                 | Mean ±SD                  | 25.1 ± 4.2        | 25.0 ± 3.6        | 0.84 |
|                           |                 |                 | Median [Q1, Q3]           | 24.6 [21.6, 28.0] | 24.6 [22.2, 27.0] | 1.00 |
|                           |                 |                 | Min, Max                  | 17.1, 39.0        | 19.4, 38.2        |      |
|                           |                 | 12 週            | n                         | 62                | 65                |      |
|                           |                 |                 | Mean ±SD                  | 25.0 ± 4.5        | 24.8 ± 3.9        | 0.77 |
|                           |                 |                 | Median [Q1, Q3]           | 24.3 [21.5, 27.9] | 24.6 [22.1, 26.7] | 0.90 |
|                           |                 |                 | Min, Max                  | 16.0, 40.3        | 19.0, 39.7        |      |
|                           |                 | 24 週            | n                         | 64                | 66                |      |
|                           |                 |                 | Mean ±SD                  | 25.2 ± 4.6        | 24.7 ± 4.2        | 0.51 |
|                           |                 |                 | Median [Q1, Q3]           | 24.8 [21.8, 27.4] | 24.4 [22.0, 26.7] | 0.54 |
|                           |                 |                 | Min, Max                  | 16.0, 41.3        | 15.9, 40.4        |      |
|                           | 変化量             | 12 週            | n                         | 62                | 65                |      |
|                           |                 |                 | Mean ±SD                  | 0.0 ± 0.8         | -0.2 ± 1.6        | 0.41 |
|                           |                 |                 | Median [Q1, Q3]           | 0.0 [-0.4, 0.4]   | 0.0 [-0.2, 0.4]   | 0.86 |
|                           |                 |                 | Min, Max                  | -2.6, 2.9         | -11.2, 2.4        |      |
|                           |                 |                 | One-sample t-test         | 0.69              | 0.46              |      |
|                           |                 |                 | Wilcoxon signed-rank test | 0.87              | 0.72              |      |
|                           |                 | 24 週            | n                         | 64                | 66                |      |
|                           |                 |                 | Mean ±SD                  | 0.1 ± 0.9         | -0.3 ± 1.9        | 0.16 |
|                           | Median [Q1, Q3] | 0.0 [-0.5, 0.6] | 0.0 [-0.6, 0.6]           | 0.45              |                   |      |
|                           | Min, Max        | -2.0, 2.9       | -11.5, 4.1                |                   |                   |      |

5. 副次評価項目  
5.1. FAS  
バイタルサイン、一般血液・尿検査

|                 |                   |                           |                           |                      |                      |      |
|-----------------|-------------------|---------------------------|---------------------------|----------------------|----------------------|------|
|                 |                   |                           | One-sample t-test         | 0.38                 | 0.25                 |      |
|                 |                   |                           | Wilcoxon signed-rank test | 0.55                 | 0.63                 |      |
| 収縮期血圧<br>(mmHg) | 測定値               | 0 週                       | n                         | 70                   | 70                   |      |
|                 |                   |                           | Mean ±SD                  | 124.3 ±19.7          | 125.7 ±18.0          | 0.65 |
|                 |                   |                           | Median [Q1, Q3]           | 120.5 [110.0, 137.0] | 124.0 [113.0, 138.0] | 0.60 |
|                 |                   |                           | Min, Max                  | 91.0, 171.0          | 90.0, 163.0          |      |
|                 |                   | 12 週                      | n                         | 68                   | 70                   |      |
|                 |                   |                           | Mean ±SD                  | 123.2 ±18.2          | 125.1 ±17.0          | 0.52 |
|                 |                   |                           | Median [Q1, Q3]           | 120.0 [110.0, 134.5] | 123.5 [116.0, 140.0] | 0.35 |
|                 |                   |                           | Min, Max                  | 96.0, 172.0          | 93.0, 158.0          |      |
|                 |                   | 24 週                      | n                         | 66                   | 67                   |      |
|                 |                   |                           | Mean ±SD                  | 125.9 ±19.1          | 124.0 ±19.2          | 0.57 |
|                 |                   |                           | Median [Q1, Q3]           | 123.0 [114.0, 136.0] | 124.0 [113.0, 135.0] | 0.71 |
|                 |                   |                           | Min, Max                  | 95.0, 179.0          | 84.0, 164.0          |      |
|                 | 変化量               | 12 週                      | n                         | 68                   | 70                   |      |
|                 |                   |                           | Mean ±SD                  | -1.1 ±16.8           | -0.6 ±16.0           | 0.86 |
|                 |                   |                           | Median [Q1, Q3]           | 1.5 [-12.5, 10.0]    | 2.0 [-9.0, 7.0]      | 0.83 |
|                 |                   |                           | Min, Max                  | -53.0, 37.0          | -53.0, 32.0          |      |
|                 |                   |                           | One-sample t-test         | 0.59                 | 0.76                 |      |
|                 |                   |                           | Wilcoxon signed-rank test | 0.82                 | 0.96                 |      |
| 24 週            |                   | n                         | 66                        | 67                   |                      |      |
|                 |                   | Mean ±SD                  | 1.6 ±16.7                 | -0.8 ±18.2           | 0.43                 |      |
|                 |                   | Median [Q1, Q3]           | 2.0 [-8.0, 11.0]          | 1.0 [-12.0, 9.0]     | 0.47                 |      |
|                 |                   | Min, Max                  | -47.0, 53.0               | -60.0, 40.0          |                      |      |
|                 |                   | One-sample t-test         | 0.44                      | 0.71                 |                      |      |
|                 |                   | Wilcoxon signed-rank test | 0.28                      | 0.93                 |                      |      |
| 拡張期血圧<br>(mmHg) | 測定値               | 0 週                       | n                         | 70                   | 70                   |      |
|                 |                   |                           | Mean ±SD                  | 73.6 ±15.3           | 73.1 ±12.7           | 0.84 |
|                 |                   |                           | Median [Q1, Q3]           | 73.0 [60.0, 83.0]    | 73.5 [66.0, 79.0]    | 0.78 |
|                 |                   |                           | Min, Max                  | 47.0, 116.0          | 42.0, 118.0          |      |
|                 |                   | 12 週                      | n                         | 68                   | 70                   |      |
|                 |                   |                           | Mean ±SD                  | 71.9 ±16.3           | 72.9 ±13.6           | 0.69 |
|                 |                   |                           | Median [Q1, Q3]           | 70.0 [60.0, 81.5]    | 74.0 [63.0, 82.0]    | 0.41 |
|                 |                   |                           | Min, Max                  | 46.0, 123.0          | 40.0, 108.0          |      |
|                 |                   | 24 週                      | n                         | 66                   | 67                   |      |
|                 |                   |                           | Mean ±SD                  | 72.0 ±15.5           | 73.9 ±15.8           | 0.50 |
|                 |                   |                           | Median [Q1, Q3]           | 71.0 [60.0, 83.0]    | 70.0 [64.0, 83.0]    | 0.51 |
|                 |                   |                           | Min, Max                  | 40.0, 122.0          | 44.0, 124.0          |      |
|                 | 変化量               | 12 週                      | n                         | 68                   | 70                   |      |
|                 |                   |                           | Mean ±SD                  | -1.5 ±14.8           | -0.2 ±12.4           | 0.59 |
|                 |                   |                           | Median [Q1, Q3]           | -2.0 [-11.0, 5.0]    | 0.0 [-8.0, 8.0]      | 0.32 |
|                 |                   |                           | Min, Max                  | -45.0, 45.0          | -34.0, 35.0          |      |
|                 |                   |                           | One-sample t-test         | 0.42                 | 0.89                 |      |
|                 |                   |                           | Wilcoxon signed-rank test | 0.17                 | 0.87                 |      |
| 24 週            | n                 | 66                        | 67                        |                      |                      |      |
|                 | Mean ±SD          | -1.0 ±13.8                | 0.7 ±13.8                 | 0.46                 |                      |      |
|                 | Median [Q1, Q3]   | -0.5 [-8.0, 6.0]          | 0.0 [-8.0, 8.0]           | 0.46                 |                      |      |
|                 | Min, Max          | -34.0, 52.0               | -28.0, 34.0               |                      |                      |      |
|                 | One-sample t-test | 0.54                      | 0.67                      |                      |                      |      |



5. 副次評価項目  
5.1. FAS  
バイタルサイン、一般血液・尿検査

|                              |                 |                           |                           |                      |                      |      |
|------------------------------|-----------------|---------------------------|---------------------------|----------------------|----------------------|------|
|                              |                 |                           | Wilcoxon signed-rank test | 0.33                 | 0.83                 |      |
| 脈拍 (bpm)                     | 測定値             | 0 週                       | n                         | 69                   | 70                   |      |
|                              |                 |                           | Mean ± SD                 | 72.3 ± 14.0          | 72.0 ± 13.4          | 0.91 |
|                              |                 |                           | Median [Q1, Q3]           | 71.0 [64.0, 80.0]    | 72.0 [62.0, 83.0]    | 0.81 |
|                              |                 |                           | Min, Max                  | 44.0, 114.0          | 41.0, 98.0           |      |
|                              |                 | 12 週                      | n                         | 64                   | 69                   |      |
|                              |                 |                           | Mean ± SD                 | 75.3 ± 15.3          | 73.3 ± 12.5          | 0.41 |
|                              |                 |                           | Median [Q1, Q3]           | 74.5 [64.0, 84.5]    | 74.0 [63.0, 83.0]    | 0.61 |
|                              |                 |                           | Min, Max                  | 47.0, 134.0          | 47.0, 106.0          |      |
|                              |                 | 24 週                      | n                         | 64                   | 67                   |      |
|                              |                 |                           | Mean ± SD                 | 73.4 ± 15.1          | 75.0 ± 16.2          | 0.57 |
|                              |                 |                           | Median [Q1, Q3]           | 73.0 [63.0, 82.5]    | 72.0 [62.0, 86.0]    | 0.76 |
|                              |                 |                           | Min, Max                  | 43.0, 120.0          | 51.0, 130.0          |      |
|                              | 変化量             | 12 週                      | n                         | 64                   | 69                   |      |
|                              |                 |                           | Mean ± SD                 | 2.8 ± 10.1           | 1.1 ± 13.2           | 0.39 |
|                              |                 |                           | Median [Q1, Q3]           | 0.5 [-4.0, 7.5]      | 0.0 [-6.0, 10.0]     | 0.70 |
|                              |                 |                           | Min, Max                  | -14.0, 33.0          | -40.0, 29.0          |      |
| One-sample t-test            |                 |                           | 0.029                     | 0.50                 |                      |      |
| Wilcoxon signed-rank test    |                 |                           | 0.12                      | 0.36                 |                      |      |
| 24 週                         |                 | n                         | 64                        | 67                   |                      |      |
|                              |                 | Mean ± SD                 | 2.2 ± 16.0                | 2.9 ± 16.6           | 0.82                 |      |
|                              |                 | Median [Q1, Q3]           | 0.0 [-6.5, 10.0]          | 1.0 [-8.0, 9.0]      | 0.92                 |      |
|                              |                 | Min, Max                  | -47.0, 58.0               | -31.0, 56.0          |                      |      |
|                              |                 | One-sample t-test         | 0.27                      | 0.16                 |                      |      |
|                              |                 | Wilcoxon signed-rank test | 0.30                      | 0.39                 |                      |      |
| NYHA 分類                      | 測定値             | 0 週                       | n                         | 70                   | 70                   |      |
|                              |                 |                           | Median [Q1, Q3]           | 1.0 [1.0, 2.0]       | 1.0 [1.0, 2.0]       | 0.47 |
|                              |                 |                           | Min, Max                  | 1.0, 2.0             | 1.0, 2.0             |      |
|                              |                 | 12 週                      | n                         | 68                   | 70                   |      |
|                              |                 |                           | Median [Q1, Q3]           | 1.0 [1.0, 2.0]       | 1.0 [1.0, 2.0]       | 0.90 |
|                              |                 |                           | Min, Max                  | 1.0, 2.0             | 1.0, 2.0             |      |
|                              |                 | 24 週                      | n                         | 66                   | 66                   |      |
|                              |                 |                           | Median [Q1, Q3]           | 1.0 [1.0, 2.0]       | 1.0 [1.0, 2.0]       | 0.59 |
|                              |                 |                           | Min, Max                  | 1.0, 3.0             | 1.0, 4.0             |      |
|                              | 変化量             | 12 週                      | n                         | 68                   | 70                   |      |
|                              |                 |                           | Median [Q1, Q3]           | 0.0 [0.0, 0.0]       | 0.0 [0.0, 0.0]       | 0.41 |
|                              |                 |                           | Min, Max                  | -1.0, 1.0            | -1.0, 1.0            |      |
| 24 週                         | n               | 66                        | 66                        |                      |                      |      |
|                              | Median [Q1, Q3] | 0.0 [0.0, 0.0]            | 0.0 [0.0, 0.0]            | 0.08                 |                      |      |
|                              | Min, Max        | -1.0, 1.0                 | -1.0, 2.0                 |                      |                      |      |
| 赤血球数 (× 10 <sup>4</sup> /μL) | 測定値             | 0 週                       | n                         | 69                   | 69                   |      |
|                              |                 |                           | Mean ± SD                 | 444.6 ± 46.3         | 432.8 ± 65.4         | 0.23 |
|                              |                 |                           | Median [Q1, Q3]           | 448.0 [411.0, 472.0] | 432.0 [384.0, 478.0] | 0.21 |
|                              |                 |                           | Min, Max                  | 355.0, 568.0         | 274.0, 577.0         |      |
|                              |                 | 12 週                      | n                         | 69                   | 70                   |      |
|                              |                 |                           | Mean ± SD                 | 443.2 ± 52.2         | 426.6 ± 71.2         | 0.12 |
|                              |                 |                           | Median [Q1, Q3]           | 433.0 [406.0, 485.0] | 422.5 [378.0, 484.0] | 0.18 |
|                              |                 |                           |                           |                      |                      |      |
|                              |                 |                           |                           |                      |                      |      |

5. 副次評価項目  
5.1. FAS  
バイタルサイン、一般血液・尿検査

|                  |      |                           |                           |                           |                         |                         |                     |      |
|------------------|------|---------------------------|---------------------------|---------------------------|-------------------------|-------------------------|---------------------|------|
|                  |      |                           | Min, Max                  | 303.0, 565.0              | 234.0, 570.0            |                         |                     |      |
|                  | 24 週 | n                         |                           | 67                        | 67                      |                         |                     |      |
|                  |      | Mean ± SD                 |                           | 443.4 ± 56.7              | 423.5 ± 69.7            | 0.07                    |                     |      |
|                  |      | Median [Q1, Q3]           |                           | 448.0 [410.0, 481.0]      | 412.0 [381.0, 469.0]    | 0.05                    |                     |      |
|                  |      | Min, Max                  |                           | 313.0, 598.0              | 284.0, 580.0            |                         |                     |      |
|                  | 変化量  | 12 週                      | n                         | 68                        | 69                      |                         |                     |      |
|                  |      |                           | Mean ± SD                 | -0.9 ± 25.8               | -5.6 ± 34.4             | 0.37                    |                     |      |
|                  |      |                           | Median [Q1, Q3]           | 1.0 [-20.5, 15.0]         | -3.0 [-24.0, 18.0]      | 0.58                    |                     |      |
|                  |      |                           | Min, Max                  | -55.0, 73.0               | -135.0, 70.0            |                         |                     |      |
|                  |      |                           | One-sample t-test         | 0.76                      | 0.18                    |                         |                     |      |
|                  |      |                           | Wilcoxon signed-rank test | 0.88                      | 0.36                    |                         |                     |      |
|                  |      | 24 週                      | n                         | 66                        | 66                      |                         |                     |      |
|                  |      | Mean ± SD                 |                           | -2.2 ± 30.2               | -10.2 ± 31.2            | 0.13                    |                     |      |
|                  |      | Median [Q1, Q3]           |                           | -1.5 [-17.0, 20.0]        | -11.0 [-26.0, 10.0]     | 0.09                    |                     |      |
|                  |      | Min, Max                  |                           | -125.0, 62.0              | -154.0, 53.0            |                         |                     |      |
|                  |      | One-sample t-test         |                           | 0.56                      | 0.010                   |                         |                     |      |
|                  |      | Wilcoxon signed-rank test |                           | 0.82                      | 0.011                   |                         |                     |      |
| 白血球数<br>(/μL)    | 測定値  | 0 週                       | n                         | 69                        | 69                      |                         |                     |      |
|                  |      |                           | Mean ± SD                 |                           | 5688.4 ± 1312.9         | 6140.0 ± 1813.8         | 0.10                |      |
|                  |      |                           | Median [Q1, Q3]           |                           | 5500.0 [4900.0, 6600.0] | 5800.0 [5000.0, 7000.0] | 0.17                |      |
|                  |      |                           | Min, Max                  |                           | 2900.0, 9400.0          | 2500.0, 11700.0         |                     |      |
|                  |      |                           | 12 週                      | n                         | 69                      | 70                      |                     |      |
|                  |      | Mean ± SD                 |                           |                           | 5802.9 ± 1480.8         | 6072.9 ± 1742.6         | 0.33                |      |
|                  |      | Median [Q1, Q3]           |                           |                           | 5600.0 [4800.0, 6900.0] | 6100.0 [4700.0, 7100.0] | 0.43                |      |
|                  |      | Min, Max                  |                           |                           | 3200.0, 9800.0          | 3100.0, 11400.0         |                     |      |
|                  |      |                           | 24 週                      | n                         | 67                      | 67                      |                     |      |
|                  |      | Mean ± SD                 |                           |                           | 5694.0 ± 1412.1         | 5965.7 ± 1605.2         | 0.30                |      |
|                  |      | Median [Q1, Q3]           |                           |                           | 5600.0 [4600.0, 6400.0] | 5800.0 [4900.0, 6400.0] | 0.40                |      |
|                  |      | Min, Max                  |                           |                           | 3000.0, 10100.0         | 3100.0, 11100.0         |                     |      |
|                  |      | 変化量                       | 12 週                      | n                         | 68                      | 69                      |                     |      |
|                  |      |                           |                           | Mean ± SD                 |                         | 142.6 ± 1121.2          | -51.6 ± 1282.7      | 0.35 |
|                  |      |                           |                           | Median [Q1, Q3]           |                         | 200.0 [-600.0, 1000.0]  | 0.0 [-700.0, 400.0] | 0.39 |
|                  |      |                           |                           | Min, Max                  |                         | -2100.0, 2600.0         | -5900.0, 2600.0     |      |
|                  |      |                           |                           | One-sample t-test         |                         | 0.30                    | 0.74                |      |
|                  |      |                           |                           | Wilcoxon signed-rank test |                         | 0.35                    | 0.68                |      |
|                  |      | 24 週                      | n                         | 66                        | 66                      |                         |                     |      |
|                  |      |                           | Mean ± SD                 |                           | 78.8 ± 973.9            | -84.2 ± 1190.9          | 0.39                |      |
|                  |      |                           | Median [Q1, Q3]           |                           | 100.0 [-300.0, 600.0]   | -100.0 [-600.0, 400.0]  | 0.15                |      |
|                  |      |                           | Min, Max                  |                           | -3400.0, 2900.0         | -4200.0, 3400.0         |                     |      |
|                  |      |                           | One-sample t-test         |                           | 0.51                    | 0.57                    |                     |      |
|                  |      |                           | Wilcoxon signed-rank test |                           | 0.27                    | 0.35                    |                     |      |
| ヘモグロビン<br>(g/dL) | 測定値  | 0 週                       | n                         | 69                        | 69                      |                         |                     |      |
|                  |      |                           | Mean ± SD                 |                           | 13.6 ± 1.5              | 13.3 ± 1.9              | 0.25                |      |
|                  |      |                           | Median [Q1, Q3]           |                           | 13.8 [12.7, 14.7]       | 13.1 [12.1, 14.7]       | 0.22                |      |

## 5. 副次評価項目

## 5.1. FAS

## バイタルサイン、一般血液・尿検査

|                              |                           |      |                           |                  |                   |                   |                 |      |
|------------------------------|---------------------------|------|---------------------------|------------------|-------------------|-------------------|-----------------|------|
|                              |                           |      | Min, Max                  | 9.0, 16.6        | 8.8, 17.1         |                   |                 |      |
|                              |                           | 12 週 | n                         |                  | 69                | 70                |                 |      |
|                              |                           |      | Mean ±SD                  |                  | 13.5 ±1.6         | 13.2 ±2.2         | 0.29            |      |
|                              |                           |      | Median [Q1, Q3]           |                  | 13.5 [12.4, 14.9] | 13.1 [11.4, 14.8] | 0.36            |      |
|                              |                           |      | Min, Max                  |                  | 9.2, 16.5         | 7.4, 16.9         |                 |      |
|                              |                           | 24 週 | n                         |                  | 67                | 67                |                 |      |
|                              |                           |      | Mean ±SD                  |                  | 13.4 ±1.9         | 13.1 ±2.1         | 0.38            |      |
|                              |                           |      | Median [Q1, Q3]           |                  | 13.7 [12.1, 15.0] | 12.9 [11.7, 14.8] | 0.32            |      |
|                              |                           |      | Min, Max                  |                  | 8.5, 17.0         | 8.5, 17.5         |                 |      |
|                              |                           | 変化量  | 12 週                      | n                |                   | 68                | 69              |      |
|                              |                           |      |                           | Mean ±SD         |                   | -0.1 ±0.8         | -0.1 ±1.0       | 0.91 |
|                              |                           |      |                           | Median [Q1, Q3]  |                   | -0.1 [-0.6, 0.3]  | 0.0 [-0.7, 0.5] | 0.77 |
|                              | Min, Max                  |      |                           |                  | -1.9, 2.2         | -4.0, 1.7         |                 |      |
|                              | One-sample t-test         |      |                           |                  | 0.24              | 0.26              |                 |      |
|                              | Wilcoxon signed-rank test |      |                           |                  | 0.25              | 0.49              |                 |      |
|                              | 24 週                      |      | n                         |                  | 66                | 66                |                 |      |
|                              |                           |      | Mean ±SD                  |                  | -0.2 ±0.9         | -0.2 ±1.0         | 0.99            |      |
|                              |                           |      | Median [Q1, Q3]           |                  | -0.1 [-0.7, 0.4]  | -0.3 [-0.8, 0.3]  | 0.76            |      |
| Min, Max                     |                           |      |                           | -3.6, 1.5        | -4.8, 2.6         |                   |                 |      |
| One-sample t-test            |                           |      |                           | 0.06             | 0.08              |                   |                 |      |
| Wilcoxon signed-rank test    |                           |      |                           | 0.13             | 0.049             |                   |                 |      |
| ヘマトクリット (%)                  | 測定値                       | 0 週  | n                         |                  | 69                | 69                |                 |      |
|                              |                           |      | Mean ±SD                  |                  | 41.3 ±4.2         | 40.2 ±5.2         | 0.18            |      |
|                              |                           |      | Median [Q1, Q3]           |                  | 41.6 [38.7, 43.8] | 40.1 [36.5, 43.5] | 0.13            |      |
|                              |                           |      | Min, Max                  |                  | 28.3, 51.6        | 27.4, 51.1        |                 |      |
|                              |                           | 12 週 | n                         |                  | 69                | 70                |                 |      |
|                              |                           |      | Mean ±SD                  |                  | 41.1 ±4.7         | 40.0 ±6.0         | 0.24            |      |
|                              |                           |      | Median [Q1, Q3]           |                  | 41.0 [38.0, 44.4] | 39.6 [35.6, 44.8] | 0.30            |      |
|                              |                           |      | Min, Max                  |                  | 28.5, 51.9        | 24.6, 50.4        |                 |      |
|                              |                           | 24 週 | n                         |                  | 67                | 67                |                 |      |
|                              |                           |      | Mean ±SD                  |                  | 40.8 ±5.4         | 39.7 ±5.9         | 0.26            |      |
|                              |                           |      | Median [Q1, Q3]           |                  | 41.1 [37.0, 44.6] | 39.1 [35.5, 43.3] | 0.21            |      |
|                              |                           |      | Min, Max                  |                  | 28.0, 53.5        | 26.9, 52.2        |                 |      |
|                              | 変化量                       | 12 週 | n                         |                  | 68                | 69                |                 |      |
|                              |                           |      | Mean ±SD                  |                  | -0.2 ±2.3         | -0.2 ±3.0         | 0.99            |      |
|                              |                           |      | Median [Q1, Q3]           |                  | 0.1 [-1.3, 1.4]   | -0.1 [-1.6, 1.6]  | 0.74            |      |
|                              |                           |      | Min, Max                  |                  | -6.3, 5.9         | -13.1, 5.1        |                 |      |
|                              |                           |      | One-sample t-test         |                  | 0.58              | 0.67              |                 |      |
|                              |                           |      | Wilcoxon signed-rank test |                  | 0.77              | 0.95              |                 |      |
| 24 週                         | n                         |      | 66                        | 66               |                   |                   |                 |      |
|                              | Mean ±SD                  |      | -0.5 ±2.9                 | -0.6 ±2.9        | 0.84              |                   |                 |      |
|                              | Median [Q1, Q3]           |      | -0.3 [-1.8, 1.6]          | -0.6 [-2.4, 1.2] | 0.53              |                   |                 |      |
|                              | Min, Max                  |      | -12.1, 4.9                | -15.0, 5.0       |                   |                   |                 |      |
|                              | One-sample t-test         |      | 0.20                      | 0.12             |                   |                   |                 |      |
|                              | Wilcoxon signed-rank test |      | 0.48                      | 0.11             |                   |                   |                 |      |
| 血小板数 (× 10 <sup>4</sup> /μL) | 測定値                       | 0 週  | n                         |                  | 69                | 69                |                 |      |
|                              |                           |      | Mean ±SD                  |                  | 19.8 ±7.9         | 19.8 ±6.5         | 0.95            |      |
|                              |                           |      | Median [Q1, Q3]           |                  | 19.3 [15.2, 22.1] | 19.1 [15.7, 22.6] | 0.92            |      |
|                              |                           |      | Min, Max                  |                  | 8.6, 68.6         | 9.9, 46.8         |                 |      |

## 5. 副次評価項目

## 5.1. FAS

## バイタルサイン、一般血液・尿検査

|                           |                           |                 |                           |                   |                   |       |
|---------------------------|---------------------------|-----------------|---------------------------|-------------------|-------------------|-------|
|                           | 12 週                      | n               | 69                        | 70                |                   |       |
|                           |                           | Mean ±SD        | 20.3 ±6.3                 | 20.2 ±5.8         | 0.94              |       |
|                           |                           | Median [Q1, Q3] | 19.6 [16.6, 22.8]         | 20.1 [15.7, 23.5] | 0.92              |       |
|                           |                           | Min, Max        | 8.0, 37.1                 | 10.1, 37.1        |                   |       |
|                           |                           | 24 週            | n                         | 67                | 67                |       |
|                           |                           |                 | Mean ±SD                  | 20.1 ±5.6         | 19.4 ±5.3         | 0.41  |
|                           |                           |                 | Median [Q1, Q3]           | 19.8 [16.6, 23.4] | 18.8 [16.0, 22.5] | 0.41  |
|                           |                           |                 | Min, Max                  | 8.6, 39.4         | 8.0, 37.0         |       |
|                           | 変化量                       | 12 週            | n                         | 68                | 69                |       |
|                           |                           |                 | Mean ±SD                  | 0.5 ±5.8          | 0.5 ±4.1          | 0.93  |
|                           |                           |                 | Median [Q1, Q3]           | 0.6 [-0.5, 2.7]   | 0.3 [-0.9, 1.8]   | 0.37  |
|                           |                           |                 | Min, Max                  | -35.2, 14.3       | -13.1, 21.7       |       |
|                           |                           |                 | One-sample t-test         | 0.52              | 0.29              |       |
|                           |                           |                 | Wilcoxon signed-rank test | 0.016             | 0.16              |       |
| 24 週                      |                           | n               | 66                        | 66                |                   |       |
|                           |                           | Mean ±SD        | 0.9 ±2.9                  | 0.1 ±2.7          | 0.08              |       |
| AST (IU/L)                | 測定値                       | 0 週             | n                         | 69                | 69                |       |
|                           |                           |                 | Mean ±SD                  | 26.3 ±12.2        | 23.6 ±10.1        | 0.16  |
|                           |                           |                 | Median [Q1, Q3]           | 24.0 [20.0, 29.0] | 22.0 [17.0, 27.0] | 0.040 |
|                           |                           |                 | Min, Max                  | 13.0, 106.0       | 12.0, 85.0        |       |
|                           |                           | 12 週            | n                         | 69                | 70                |       |
|                           |                           |                 | Mean ±SD                  | 26.5 ±9.0         | 24.8 ±8.8         | 0.27  |
|                           |                           |                 | Median [Q1, Q3]           | 25.0 [21.0, 31.0] | 23.0 [19.0, 28.0] | 0.17  |
|                           |                           |                 | Min, Max                  | 14.0, 63.0        | 11.0, 57.0        |       |
|                           |                           | 24 週            | n                         | 67                | 67                |       |
|                           |                           |                 | Mean ±SD                  | 25.3 ±6.6         | 24.9 ±9.0         | 0.74  |
|                           |                           |                 | Median [Q1, Q3]           | 24.0 [20.0, 30.0] | 22.0 [19.0, 27.0] | 0.28  |
|                           |                           |                 | Min, Max                  | 16.0, 45.0        | 13.0, 55.0        |       |
|                           | 変化量                       | 12 週            | n                         | 68                | 69                |       |
|                           |                           |                 | Mean ±SD                  | 0.3 ±11.5         | 1.3 ±7.3          | 0.52  |
| Median [Q1, Q3]           |                           |                 | 1.0 [-2.0, 3.5]           | 1.0 [-2.0, 5.0]   | 0.45              |       |
| Min, Max                  |                           |                 | -73.0, 35.0               | -28.0, 23.0       |                   |       |
| One-sample t-test         |                           |                 | 0.85                      | 0.13              |                   |       |
| Wilcoxon signed-rank test |                           |                 | 0.21                      | 0.023             |                   |       |
| 24 週                      | n                         | 66              | 66                        |                   |                   |       |
|                           | Mean ±SD                  | -0.5 ±10.5      | 1.2 ±7.7                  | 0.28              |                   |       |
|                           | Median [Q1, Q3]           | 1.0 [-3.0, 4.0] | 1.0 [-2.0, 4.0]           | 0.44              |                   |       |
|                           | Min, Max                  | -73.0, 11.0     | -30.0, 27.0               |                   |                   |       |
|                           | One-sample t-test         | 0.71            | 0.19                      |                   |                   |       |
|                           | Wilcoxon signed-rank test | 0.31            | 0.048                     |                   |                   |       |
| ALT (IU/L)                | 測定値                       | 0 週             | n                         | 69                | 69                |       |
|                           |                           |                 | Mean ±SD                  | 20.3 ±11.3        | 18.0 ±10.3        | 0.21  |
|                           |                           |                 | Median [Q1, Q3]           | 18.0 [14.0, 24.0] | 16.0 [12.0, 21.0] | 0.037 |
|                           |                           |                 | Min, Max                  | 8.0, 87.0         | 6.0, 63.0         |       |
|                           |                           | 12 週            | n                         | 69                | 70                |       |

## 5. 副次評価項目

## 5.1. FAS

## バイタルサイン、一般血液・尿検査

|               |     |      |                 |                           |                           |                      |                  |      |
|---------------|-----|------|-----------------|---------------------------|---------------------------|----------------------|------------------|------|
|               |     |      | Mean ± SD       | 20.8 ± 10.1               | 18.5 ± 9.0                | 0.16                 |                  |      |
|               |     |      | Median [Q1, Q3] | 18.0 [14.0, 24.0]         | 16.0 [13.0, 23.0]         | 0.14                 |                  |      |
|               |     |      | Min, Max        | 8.0, 60.0                 | 6.0, 48.0                 |                      |                  |      |
|               |     | 24 週 | n               | 67                        | 67                        |                      |                  |      |
|               |     |      | Mean ± SD       | 20.2 ± 9.7                | 19.2 ± 10.8               | 0.57                 |                  |      |
|               |     |      | Median [Q1, Q3] | 19.0 [14.0, 24.0]         | 16.0 [11.0, 25.0]         | 0.28                 |                  |      |
|               |     |      | Min, Max        | 8.0, 60.0                 | 7.0, 61.0                 |                      |                  |      |
|               | 変化量 | 12 週 | n               | 68                        | 69                        |                      |                  |      |
|               |     |      |                 | Mean ± SD                 | 0.3 ± 10.1                | 0.6 ± 7.2            | 0.81             |      |
|               |     |      |                 | Median [Q1, Q3]           | 0.5 [-2.0, 4.0]           | 1.0 [-1.0, 3.0]      | 0.78             |      |
|               |     |      |                 | Min, Max                  | -66.0, 21.0               | -27.0, 25.0          |                  |      |
|               |     |      |                 | One-sample t-test         | 0.84                      | 0.49                 |                  |      |
|               |     |      |                 | Wilcoxon signed-rank test | 0.23                      | 0.09                 |                  |      |
|               |     |      | 24 週            | n                         | 66                        | 66                   |                  |      |
|               |     |      |                 | Mean ± SD                 | 0.0 ± 10.9                | 1.2 ± 8.3            | 0.47             |      |
|               |     |      |                 | Median [Q1, Q3]           | 0.0 [-2.0, 3.0]           | 0.0 [-2.0, 4.0]      | 0.86             |      |
|               |     |      |                 | Min, Max                  | -72.0, 32.0               | -20.0, 47.0          |                  |      |
|               |     |      |                 | One-sample t-test         | 0.99                      | 0.24                 |                  |      |
|               |     |      |                 | Wilcoxon signed-rank test | 0.48                      | 0.27                 |                  |      |
| ALP (IU/L)    |     | 測定値  | 0 週             | n                         | 66                        | 68                   |                  |      |
|               |     |      |                 |                           | Mean ± SD                 | 229.7 ± 93.9         | 222.4 ± 76.3     | 0.62 |
|               |     |      |                 | Median [Q1, Q3]           | 202.5 [176.0, 241.0]      | 206.5 [172.5, 267.0] | 0.96             |      |
|               |     |      |                 | Min, Max                  | 107.0, 636.0              | 86.0, 473.0          |                  |      |
|               |     |      | 12 週            | n                         | 65                        | 69                   |                  |      |
|               |     |      |                 | Mean ± SD                 | 240.9 ± 93.1              | 233.8 ± 81.0         | 0.64             |      |
|               |     |      |                 | Median [Q1, Q3]           | 218.0 [186.0, 265.0]      | 216.0 [182.0, 289.0] | 0.79             |      |
|               |     |      |                 | Min, Max                  | 110.0, 658.0              | 94.0, 492.0          |                  |      |
|               |     |      | 24 週            | n                         | 66                        | 67                   |                  |      |
|               |     |      |                 | Mean ± SD                 | 239.6 ± 90.8              | 237.0 ± 91.1         | 0.87             |      |
|               |     |      |                 | Median [Q1, Q3]           | 223.0 [169.0, 273.0]      | 220.0 [179.0, 266.0] | 0.98             |      |
|               |     |      |                 | Min, Max                  | 122.0, 525.0              | 96.0, 583.0          |                  |      |
|               |     | 変化量  | 12 週            | n                         | 62                        | 67                   |                  |      |
|               |     |      |                 |                           | Mean ± SD                 | 6.6 ± 37.7           | 12.5 ± 43.4      | 0.41 |
|               |     |      |                 |                           | Median [Q1, Q3]           | 4.0 [-11.0, 22.0]    | 19.0 [1.0, 30.0] | 0.05 |
|               |     |      |                 |                           | Min, Max                  | -91.0, 101.0         | -182.0, 141.0    |      |
|               |     |      |                 |                           | One-sample t-test         | 0.17                 | 0.021            |      |
|               |     |      |                 |                           | Wilcoxon signed-rank test | 0.20                 | <0.001           |      |
|               |     |      | 24 週            | n                         | 62                        | 65                   |                  |      |
|               |     |      |                 | Mean ± SD                 | 7.5 ± 53.2                | 15.8 ± 53.0          | 0.38             |      |
|               |     |      |                 | Median [Q1, Q3]           | 3.0 [-21.0, 33.0]         | 15.0 [-7.0, 33.0]    | 0.18             |      |
|               |     |      |                 | Min, Max                  | -152.0, 222.0             | -173.0, 264.0        |                  |      |
|               |     |      |                 | One-sample t-test         | 0.27                      | 0.019                |                  |      |
|               |     |      |                 | Wilcoxon signed-rank test | 0.31                      | 0.002                |                  |      |
| T-Bil (mg/dL) | 測定値 | 0 週  | n               | 69                        | 69                        |                      |                  |      |
|               |     |      |                 | Mean ± SD                 | 0.90 ± 0.38               | 0.82 ± 0.42          | 0.23             |      |
|               |     |      |                 | Median [Q1, Q3]           | 0.80 [0.70, 1.01]         | 0.70 [0.60, 0.90]    | 0.06             |      |
|               |     |      |                 | Min, Max                  | 0.27, 2.50                | 0.30, 2.79           |                  |      |
|               |     |      | 12 週            | n                         | 68                        | 69                   |                  |      |
|               |     |      |                 | Mean ± SD                 | 0.82 ± 0.35               | 0.77 ± 0.36          | 0.42             |      |

5. 副次評価項目  
5.1. FAS  
バイタルサイン、一般血液・尿検査

|                            |      |                           |                           |                     |                     |                 |      |
|----------------------------|------|---------------------------|---------------------------|---------------------|---------------------|-----------------|------|
|                            |      |                           | Median [Q1, Q3]           | 0.76 [0.56, 1.00]   | 0.70 [0.50, 0.90]   | 0.26            |      |
|                            |      |                           | Min, Max                  | 0.26, 1.70          | 0.30, 2.01          |                 |      |
|                            | 24 週 | n                         |                           | 67                  | 67                  |                 |      |
|                            |      | Mean ± SD                 |                           | 0.83 ± 0.34         | 0.78 ± 0.37         | 0.38            |      |
|                            |      | Median [Q1, Q3]           |                           | 0.80 [0.60, 1.01]   | 0.70 [0.50, 0.90]   | 0.21            |      |
|                            |      | Min, Max                  |                           | 0.29, 1.80          | 0.30, 2.30          |                 |      |
|                            | 変化量  | 12 週                      | n                         | 67                  | 68                  |                 |      |
|                            |      |                           | Mean ± SD                 | -0.08 ± 0.31        | -0.04 ± 0.32        | 0.47            |      |
|                            |      |                           | Median [Q1, Q3]           | 0.00 [-0.20, 0.10]  | -0.10 [-0.20, 0.10] | 0.92            |      |
|                            |      | Min, Max                  | -1.00, 0.48               | -0.78, 1.21         |                     |                 |      |
|                            |      | One-sample t-test         | 0.030                     | 0.26                |                     |                 |      |
|                            |      | Wilcoxon signed-rank test | 0.05                      | 0.043               |                     |                 |      |
|                            | 24 週 | 12 週                      | n                         | 66                  | 66                  |                 |      |
|                            |      |                           | Mean ± SD                 | -0.07 ± 0.30        | -0.05 ± 0.27        | 0.68            |      |
|                            |      |                           | Median [Q1, Q3]           | -0.05 [-0.20, 0.10] | -0.10 [-0.20, 0.14] | 0.80            |      |
|                            |      | Min, Max                  | -0.80, 0.94               | -0.60, 1.00         |                     |                 |      |
|                            |      | One-sample t-test         | 0.08                      | 0.18                |                     |                 |      |
|                            |      | Wilcoxon signed-rank test | 0.06                      | 0.14                |                     |                 |      |
| γ GTP(U/L)                 | 測定値  | 0 週                       | n                         | 68                  | 68                  |                 |      |
|                            |      |                           | Mean ± SD                 | 51.4 ± 46.6         | 39.9 ± 38.6         | 0.12            |      |
|                            |      |                           | Median [Q1, Q3]           | 35.0 [23.0, 60.0]   | 26.0 [19.5, 42.5]   | 0.028           |      |
|                            |      |                           | Min, Max                  | 10.0, 283.0         | 9.0, 235.0          |                 |      |
|                            |      |                           | 12 週                      | n                   | 68                  | 69              |      |
|                            |      | Mean ± SD                 |                           | 56.6 ± 52.1         | 48.7 ± 70.5         | 0.46            |      |
|                            |      | Median [Q1, Q3]           |                           | 36.5 [24.5, 70.0]   | 26.0 [19.0, 41.0]   | 0.019           |      |
|                            |      | Min, Max                  |                           | 9.0, 265.0          | 10.0, 522.0         |                 |      |
|                            |      |                           | 24 週                      | n                   | 66                  | 67              |      |
|                            |      | Mean ± SD                 |                           | 56.4 ± 53.5         | 41.9 ± 40.3         | 0.08            |      |
|                            |      | Median [Q1, Q3]           |                           | 36.5 [23.0, 65.0]   | 28.0 [17.0, 42.0]   | 0.024           |      |
|                            |      | Min, Max                  |                           | 8.0, 247.0          | 11.0, 209.0         |                 |      |
|                            |      | 変化量                       | 12 週                      | n                   | 66                  | 67              |      |
|                            |      |                           |                           | Mean ± SD           | 4.7 ± 24.9          | 9.6 ± 61.8      | 0.55 |
|                            |      |                           |                           | Median [Q1, Q3]     | 1.5 [-3.0, 10.0]    | 1.0 [-3.0, 5.0] | 0.39 |
|                            |      |                           | Min, Max                  | -71.0, 88.0         | -33.0, 493.0        |                 |      |
|                            |      |                           | One-sample t-test         | 0.13                | 0.21                |                 |      |
|                            |      |                           | Wilcoxon signed-rank test | 0.046               | 0.29                |                 |      |
|                            | 24 週 | n                         | 64                        | 65                  |                     |                 |      |
|                            |      | Mean ± SD                 | 7.3 ± 28.6                | 2.2 ± 18.5          | 0.23                |                 |      |
|                            |      | Median [Q1, Q3]           | 1.0 [-3.5, 10.5]          | 1.0 [-3.0, 4.0]     | 0.55                |                 |      |
|                            |      | Min, Max                  | -50.0, 145.0              | -61.0, 68.0         |                     |                 |      |
|                            |      | One-sample t-test         | 0.045                     | 0.34                |                     |                 |      |
|                            |      | Wilcoxon signed-rank test | 0.10                      | 0.44                |                     |                 |      |
| 対数変換<br>γ GTP(ln<br>(U/L)) | 測定値  | 0 週                       | n                         | 68                  | 68                  |                 |      |
|                            |      |                           | Mean ± SD                 | 3.65 ± 0.74         | 3.40 ± 0.70         | 0.044           |      |
|                            |      |                           | Median [Q1, Q3]           | 3.56 [3.14, 4.09]   | 3.26 [2.97, 3.75]   | 0.028           |      |
|                            |      |                           | Min, Max                  | 2.30, 5.65          | 2.20, 5.46          |                 |      |
|                            |      |                           | 12 週                      | n                   | 68                  | 69              |      |
|                            |      | Mean ± SD                 |                           | 3.73 ± 0.76         | 3.46 ± 0.80         | 0.048           |      |
|                            |      | Median [Q1, Q3]           | 3.60 [3.20, 4.25]         | 3.26 [2.94, 3.71]   | 0.019               |                 |      |

5. 副次評価項目  
5.1. FAS  
バイタルサイン、一般血液・尿検査

|                 |                           |                           |                   |                      |                      |       |
|-----------------|---------------------------|---------------------------|-------------------|----------------------|----------------------|-------|
|                 |                           |                           | Min, Max          | 2.20, 5.58           | 2.30, 6.26           |       |
|                 | 24 週                      | n                         |                   | 66                   | 67                   |       |
|                 |                           | Mean ± SD                 |                   | 3.71 ± 0.78          | 3.43 ± 0.73          | 0.035 |
|                 |                           | Median [Q1, Q3]           |                   | 3.60 [3.14, 4.17]    | 3.33 [2.83, 3.74]    | 0.024 |
|                 |                           | Min, Max                  |                   | 2.08, 5.51           | 2.40, 5.34           |       |
|                 | 変化量                       | 12 週                      | n                 | 66                   | 67                   |       |
|                 |                           | Mean ± SD                 |                   | 0.06 ± 0.26          | 0.08 ± 0.43          | 0.77  |
|                 |                           | Median [Q1, Q3]           |                   | 0.05 [-0.09, 0.23]   | 0.02 [-0.12, 0.18]   | 0.47  |
|                 |                           | Min, Max                  |                   | -0.67, 0.67          | -0.57, 2.89          |       |
|                 |                           | One-sample t-test         |                   | 0.07                 | 0.14                 |       |
|                 |                           | Wilcoxon signed-rank test |                   | 0.040                | 0.31                 |       |
|                 |                           | 24 週                      | n                 | 64                   | 65                   |       |
|                 |                           | Mean ± SD                 |                   | 0.10 ± 0.38          | 0.03 ± 0.27          | 0.25  |
|                 |                           | Median [Q1, Q3]           |                   | 0.03 [-0.10, 0.23]   | 0.05 [-0.13, 0.17]   | 0.48  |
|                 |                           | Min, Max                  |                   | -0.77, 1.46          | -0.59, 0.91          |       |
|                 |                           | One-sample t-test         |                   | 0.037                | 0.33                 |       |
|                 |                           | Wilcoxon signed-rank test |                   | 0.10                 | 0.50                 |       |
| TC (mg/dL)      | 測定値                       | 0 週                       | n                 | 68                   | 69                   |       |
|                 |                           |                           | Mean ± SD         | 176.9 ± 30.8         | 166.9 ± 32.1         | 0.06  |
|                 |                           |                           | Median [Q1, Q3]   | 179.0 [155.5, 194.5] | 162.0 [146.0, 187.0] | 0.05  |
|                 |                           |                           | Min, Max          | 110.0, 256.0         | 96.0, 254.0          |       |
|                 |                           | 12 週                      | n                 | 68                   | 69                   |       |
|                 |                           |                           | Mean ± SD         | 171.4 ± 38.0         | 168.0 ± 39.5         | 0.62  |
|                 |                           |                           | Median [Q1, Q3]   | 169.0 [148.0, 193.5] | 164.0 [141.0, 188.0] | 0.59  |
|                 |                           |                           | Min, Max          | 69.0, 276.0          | 90.0, 264.0          |       |
|                 |                           | 24 週                      | n                 | 67                   | 67                   |       |
|                 |                           |                           | Mean ± SD         | 174.0 ± 33.1         | 162.1 ± 31.8         | 0.036 |
|                 |                           |                           | Median [Q1, Q3]   | 173.0 [151.0, 193.0] | 161.0 [142.0, 180.0] | 0.06  |
|                 |                           |                           | Min, Max          | 112.0, 249.0         | 97.0, 243.0          |       |
|                 | 変化量                       | 12 週                      | n                 | 66                   | 68                   |       |
|                 |                           |                           | Mean ± SD         | -5.2 ± 25.5          | 0.2 ± 22.3           | 0.20  |
|                 |                           |                           | Median [Q1, Q3]   | -6.0 [-18.0, 9.0]    | -4.0 [-15.5, 16.0]   | 0.40  |
|                 |                           |                           | Min, Max          | -91.0, 44.0          | -49.0, 51.0          |       |
|                 |                           |                           | One-sample t-test | 0.10                 | 0.95                 |       |
|                 |                           | Wilcoxon signed-rank test | 0.16              | 0.78                 |                      |       |
|                 |                           | 24 週                      | n                 | 65                   | 66                   |       |
|                 |                           |                           | Mean ± SD         | -1.8 ± 24.5          | -5.8 ± 24.5          | 0.35  |
| Median [Q1, Q3] | 2.0 [-10.0, 12.0]         |                           | -6.0 [-16.0, 6.0] | 0.13                 |                      |       |
|                 | Min, Max                  | -69.0, 69.0               | -127.0, 33.0      |                      |                      |       |
|                 | One-sample t-test         | 0.56                      | 0.06              |                      |                      |       |
|                 | Wilcoxon signed-rank test | 0.83                      | 0.06              |                      |                      |       |
| HDL-C (mg/dL)   | 測定値                       | 0 週                       | n                 | 69                   | 69                   |       |
|                 |                           |                           | Mean ± SD         | 56.3 ± 16.1          | 55.4 ± 18.3          | 0.75  |
|                 |                           |                           | Median [Q1, Q3]   | 53.0 [47.0, 67.0]    | 51.0 [43.0, 63.0]    | 0.38  |
|                 |                           |                           | Min, Max          | 30.0, 105.0          | 30.0, 135.0          |       |
|                 |                           | 12 週                      | n                 | 68                   | 69                   |       |
|                 |                           |                           | Mean ± SD         | 56.2 ± 14.6          | 56.8 ± 20.4          | 0.83  |
|                 |                           |                           | Median [Q1, Q3]   | 56.0 [45.0, 65.0]    | 51.0 [44.0, 61.0]    | 0.44  |
|                 |                           |                           | Min, Max          | 27.0, 103.0          | 30.0, 149.0          |       |

## 5. 副次評価項目

## 5.1. FAS

バイタルサイン、一般血液・尿検査

|                           |                           |                   |                           |                     |                     |       |
|---------------------------|---------------------------|-------------------|---------------------------|---------------------|---------------------|-------|
|                           | 変化量                       | 24 週              | n                         | 66                  | 67                  |       |
|                           |                           |                   | Mean ±SD                  | 55.3 ±14.1          | 54.0 ±17.1          | 0.62  |
|                           |                           |                   | Median [Q1, Q3]           | 53.0 [46.0, 62.0]   | 51.0 [43.0, 58.0]   | 0.27  |
|                           |                           |                   | Min, Max                  | 33.0, 98.0          | 31.0, 139.0         |       |
|                           |                           | 12 週              | n                         | 67                  | 68                  |       |
|                           |                           |                   | Mean ±SD                  | -0.7 ±9.4           | 1.7 ±7.7            | 0.11  |
|                           |                           |                   | Median [Q1, Q3]           | 0.0 [-7.0, 5.0]     | 0.0 [-3.0, 5.5]     | 0.31  |
|                           |                           |                   | Min, Max                  | -30.0, 29.0         | -13.0, 26.0         |       |
|                           |                           |                   | One-sample t-test         | 0.56                | 0.07                |       |
|                           |                           |                   | Wilcoxon signed-rank test | 0.68                | 0.24                |       |
|                           |                           | 24 週              | n                         | 65                  | 66                  |       |
|                           |                           |                   | Mean ±SD                  | -0.8 ±8.5           | -1.4 ±9.0           | 0.70  |
|                           |                           |                   | Median [Q1, Q3]           | -1.0 [-6.0, 4.0]    | 0.0 [-4.0, 4.0]     | 0.79  |
|                           |                           |                   | Min, Max                  | -23.0, 23.0         | -39.0, 15.0         |       |
|                           |                           |                   | One-sample t-test         | 0.43                | 0.20                |       |
| Wilcoxon signed-rank test | 0.44                      |                   | 0.64                      |                     |                     |       |
| TG (mg/dL)                | 測定値                       | 0 週               | n                         | 67                  | 69                  |       |
|                           |                           |                   | Mean ±SD                  | 111.4 ±49.1         | 118.8 ±64.1         | 0.46  |
|                           |                           |                   | Median [Q1, Q3]           | 99.0 [76.0, 145.0]  | 104.0 [73.0, 142.0] | 0.75  |
|                           |                           |                   | Min, Max                  | 32.0, 280.0         | 44.0, 408.0         |       |
|                           |                           | 12 週              | n                         | 65                  | 64                  |       |
|                           |                           |                   | Mean ±SD                  | 126.4 ±64.2         | 124.6 ±69.6         | 0.88  |
|                           |                           |                   | Median [Q1, Q3]           | 110.0 [71.0, 167.0] | 103.5 [80.0, 139.0] | 0.86  |
|                           |                           |                   | Min, Max                  | 42.0, 338.0         | 22.0, 420.0         |       |
|                           |                           | 24 週              | n                         | 66                  | 66                  |       |
|                           |                           |                   | Mean ±SD                  | 111.0 ±55.8         | 112.2 ±58.4         | 0.90  |
|                           |                           |                   | Median [Q1, Q3]           | 99.5 [70.0, 134.0]  | 98.5 [70.0, 138.0]  | 0.99  |
|                           |                           |                   | Min, Max                  | 46.0, 362.0         | 47.0, 348.0         |       |
|                           | 変化量                       | 12 週              | n                         | 62                  | 64                  |       |
|                           |                           |                   | Mean ±SD                  | 16.8 ±42.0          | 7.7 ±63.6           | 0.35  |
|                           |                           |                   | Median [Q1, Q3]           | 13.0 [-6.0, 38.0]   | 1.5 [-16.0, 35.0]   | 0.13  |
|                           |                           |                   | Min, Max                  | -101.0, 121.0       | -191.0, 284.0       |       |
|                           |                           |                   | One-sample t-test         | 0.003               | 0.34                |       |
|                           |                           |                   | Wilcoxon signed-rank test | 0.001               | 0.35                |       |
| 24 週                      | n                         | 63                | 65                        |                     |                     |       |
|                           | Mean ±SD                  | 2.1 ±36.6         | -7.1 ±43.0                | 0.19                |                     |       |
|                           | Median [Q1, Q3]           | 4.0 [-21.0, 23.0] | -4.0 [-22.0, 18.0]        | 0.32                |                     |       |
|                           | Min, Max                  | -65.0, 136.0      | -203.0, 113.0             |                     |                     |       |
|                           | One-sample t-test         | 0.65              | 0.19                      |                     |                     |       |
|                           | Wilcoxon signed-rank test | 0.86              | 0.30                      |                     |                     |       |
| LDL-C (mg/dL)             | 測定値                       | 0 週               | n                         | 69                  | 69                  |       |
|                           |                           |                   | Mean ±SD                  | 103.2 ±29.7         | 93.8 ±24.5          | 0.045 |
|                           |                           |                   | Median [Q1, Q3]           | 101.0 [82.0, 125.0] | 92.0 [79.0, 106.0]  | 0.048 |
|                           |                           |                   | Min, Max                  | 45.0, 176.0         | 38.0, 160.0         |       |
|                           |                           | 12 週              | n                         | 68                  | 69                  |       |
|                           |                           |                   | Mean ±SD                  | 98.7 ±31.7          | 93.0 ±30.3          | 0.29  |
|                           |                           |                   | Median [Q1, Q3]           | 93.5 [73.0, 118.0]  | 88.0 [74.0, 109.0]  | 0.37  |
|                           |                           |                   | Min, Max                  | 45.0, 180.0         | 35.0, 174.0         |       |
|                           |                           | 24 週              | n                         | 66                  | 67                  |       |



## 5. 副次評価項目

## 5.1. FAS

## バイタルサイン、一般血液・尿検査

|             |     |      |                           |                      |                      |       |
|-------------|-----|------|---------------------------|----------------------|----------------------|-------|
|             |     |      | Mean ± SD                 | 100.7 ± 27.8         | 91.1 ± 26.7          | 0.046 |
|             |     |      | Median [Q1, Q3]           | 100.5 [78.0, 121.0]  | 90.0 [72.0, 110.0]   | 0.05  |
|             |     |      | Min, Max                  | 44.0, 164.0          | 35.0, 152.0          |       |
|             | 変化量 | 12 週 | n                         | 67                   | 68                   |       |
|             |     |      | Mean ± SD                 | -4.2 ± 21.1          | -1.9 ± 17.6          | 0.49  |
|             |     |      | Median [Q1, Q3]           | -5.0 [-12.0, 6.0]    | -3.0 [-13.5, 9.0]    | 0.76  |
|             |     |      | Min, Max                  | -75.0, 37.0          | -43.0, 47.0          |       |
|             |     |      | One-sample t-test         | 0.11                 | 0.38                 |       |
|             |     |      | Wilcoxon signed-rank test | 0.13                 | 0.20                 |       |
|             |     | 24 週 | n                         | 65                   | 66                   |       |
|             |     |      | Mean ± SD                 | -0.9 ± 20.1          | -3.7 ± 19.9          | 0.43  |
|             |     |      | Median [Q1, Q3]           | 0.0 [-7.0, 10.0]     | -4.5 [-11.0, 6.0]    | 0.15  |
|             |     |      | Min, Max                  | -68.0, 52.0          | -113.0, 45.0         |       |
|             |     |      | One-sample t-test         | 0.71                 | 0.14                 |       |
|             |     |      | Wilcoxon signed-rank test | 0.88                 | 0.10                 |       |
| Na (mEq/L)  | 測定値 | 0 週  | n                         | 69                   | 69                   |       |
|             |     |      | Mean ± SD                 | 140.5 ± 3.2          | 140.5 ± 2.2          | 0.93  |
|             |     |      | Median [Q1, Q3]           | 141.0 [139.0, 142.0] | 141.0 [139.0, 142.0] | 0.72  |
|             |     |      | Min, Max                  | 121.0, 145.0         | 135.0, 146.0         |       |
|             |     | 12 週 | n                         | 69                   | 70                   |       |
|             |     |      | Mean ± SD                 | 140.4 ± 2.6          | 140.8 ± 4.0          | 0.58  |
|             |     |      | Median [Q1, Q3]           | 140.0 [139.0, 142.0] | 141.0 [139.0, 142.0] | 0.25  |
|             |     |      | Min, Max                  | 129.0, 146.0         | 114.0, 152.0         |       |
|             |     | 24 週 | n                         | 67                   | 67                   |       |
|             |     |      | Mean ± SD                 | 140.5 ± 2.5          | 140.3 ± 1.9          | 0.67  |
|             |     |      | Median [Q1, Q3]           | 141.0 [139.0, 142.0] | 140.0 [139.0, 142.0] | 0.39  |
|             |     |      | Min, Max                  | 134.0, 146.0         | 136.0, 145.0         |       |
|             | 変化量 | 12 週 | n                         | 68                   | 69                   |       |
|             |     |      | Mean ± SD                 | -0.2 ± 2.2           | 0.2 ± 4.1            | 0.53  |
|             |     |      | Median [Q1, Q3]           | 0.0 [-2.0, 1.0]      | 0.0 [-1.0, 2.0]      | 0.07  |
|             |     |      | Min, Max                  | -5.0, 8.0            | -27.0, 9.0           |       |
|             |     |      | One-sample t-test         | 0.55                 | 0.70                 |       |
|             |     |      | Wilcoxon signed-rank test | 0.36                 | 0.14                 |       |
|             |     | 24 週 | n                         | 66                   | 66                   |       |
|             |     |      | Mean ± SD                 | -0.1 ± 2.5           | -0.2 ± 2.1           | 0.88  |
|             |     |      | Median [Q1, Q3]           | 0.0 [-1.0, 1.0]      | 0.0 [-2.0, 1.0]      | 0.86  |
|             |     |      | Min, Max                  | -5.0, 14.0           | -6.0, 7.0            |       |
|             |     |      | One-sample t-test         | 0.77                 | 0.57                 |       |
|             |     |      | Wilcoxon signed-rank test | 0.30                 | 0.40                 |       |
| 血糖値 (mg/dL) | 測定値 | 0 週  | n                         | 67                   | 69                   |       |
|             |     |      | Mean ± SD                 | 105.9 ± 18.2         | 105.6 ± 17.1         | 0.92  |
|             |     |      | Median [Q1, Q3]           | 102.0 [94.0, 115.0]  | 103.0 [95.0, 110.0]  | 0.97  |
|             |     |      | Min, Max                  | 80.0, 179.0          | 83.0, 160.0          |       |
|             |     | 12 週 | n                         | 66                   | 63                   |       |
|             |     |      | Mean ± SD                 | 112.9 ± 24.8         | 118.0 ± 36.9         | 0.35  |
|             |     |      | Median [Q1, Q3]           | 107.0 [98.0, 121.0]  | 107.0 [95.0, 129.0]  | 0.98  |
|             |     |      | Min, Max                  | 49.0, 201.0          | 57.0, 301.0          |       |
|             |     | 24 週 | n                         | 66                   | 66                   |       |
|             |     |      | Mean ± SD                 | 108.1 ± 19.6         | 106.9 ± 17.2         | 0.72  |

## 5. 副次評価項目

## 5.1. FAS

## バイタルサイン、一般血液・尿検査

|                    |                           |                 |                           |                     |                     |      |
|--------------------|---------------------------|-----------------|---------------------------|---------------------|---------------------|------|
|                    | 変化量                       | 12 週            | Median [Q1, Q3]           | 103.0 [96.0, 117.0] | 102.0 [96.0, 115.0] | 0.65 |
|                    |                           |                 | Min, Max                  | 77.0, 186.0         | 83.0, 162.0         |      |
|                    |                           | 12 週            | n                         | 63                  | 63                  |      |
|                    |                           |                 | Mean ±SD                  | 7.0 ±19.1           | 12.2 ±25.8          | 0.20 |
|                    |                           |                 | Median [Q1, Q3]           | 6.0 [-1.0, 17.0]    | 7.0 [-1.0, 20.0]    | 0.65 |
|                    |                           |                 | Min, Max                  | -74.0, 55.0         | -42.0, 141.0        |      |
|                    |                           |                 | One-sample t-test         | 0.005               | <0.001              |      |
|                    |                           |                 | Wilcoxon signed-rank test | <0.001              | <0.001              |      |
|                    |                           | 24 週            | n                         | 63                  | 65                  |      |
|                    |                           |                 | Mean ±SD                  | 1.3 ±12.4           | 2.0 ±11.8           | 0.72 |
|                    |                           |                 | Median [Q1, Q3]           | 2.0 [-6.0, 8.0]     | 3.0 [-2.0, 6.0]     | 0.72 |
|                    |                           |                 | Min, Max                  | -33.0, 41.0         | -45.0, 53.0         |      |
|                    |                           |                 | One-sample t-test         | 0.41                | 0.17                |      |
|                    |                           |                 | Wilcoxon signed-rank test | 0.39                | 0.045               |      |
| BUN(血中浸透圧) (mg/dL) | 測定値                       | 0 週             | n                         | 69                  | 69                  |      |
|                    |                           |                 | Mean ±SD                  | 19.7 ±6.6           | 19.7 ±5.3           | 0.96 |
|                    |                           |                 | Median [Q1, Q3]           | 18.0 [15.0, 23.0]   | 19.0 [16.0, 22.0]   | 0.56 |
|                    |                           |                 | Min, Max                  | 10.0, 42.0          | 10.0, 35.0          |      |
|                    |                           | 12 週            | n                         | 69                  | 70                  |      |
|                    |                           |                 | Mean ±SD                  | 20.6 ±8.7           | 19.9 ±8.7           | 0.64 |
|                    |                           |                 | Median [Q1, Q3]           | 18.0 [15.0, 23.5]   | 18.6 [15.0, 22.0]   | 0.60 |
|                    |                           |                 | Min, Max                  | 8.0, 67.0           | 9.0, 70.0           |      |
|                    |                           | 24 週            | n                         | 67                  | 67                  |      |
|                    |                           |                 | Mean ±SD                  | 20.9 ±8.8           | 19.8 ±7.8           | 0.48 |
|                    |                           |                 | Median [Q1, Q3]           | 19.0 [15.2, 25.0]   | 19.0 [15.0, 22.0]   | 0.59 |
|                    |                           |                 | Min, Max                  | 9.0, 57.0           | 5.1, 48.0           |      |
|                    | 変化量                       | 12 週            | n                         | 68                  | 69                  |      |
|                    |                           |                 | Mean ±SD                  | 1.2 ±5.9            | 0.2 ±7.9            | 0.42 |
|                    |                           |                 | Median [Q1, Q3]           | 1.0 [-2.0, 4.0]     | 0.0 [-3.0, 3.0]     | 0.30 |
|                    |                           |                 | Min, Max                  | -10.9, 25.0         | -18.7, 48.0         |      |
|                    |                           |                 | One-sample t-test         | 0.11                | 0.83                |      |
|                    |                           |                 | Wilcoxon signed-rank test | 0.14                | 0.94                |      |
| 24 週               | n                         | 66              | 66                        |                     |                     |      |
|                    | Mean ±SD                  | 1.5 ±6.2        | 0.4 ±6.5                  | 0.33                |                     |      |
|                    | Median [Q1, Q3]           | 1.0 [-2.0, 4.0] | 0.0 [-3.0, 3.0]           | 0.27                |                     |      |
|                    | Min, Max                  | -13.0, 27.0     | -17.3, 25.0               |                     |                     |      |
|                    | One-sample t-test         | 0.06            | 0.63                      |                     |                     |      |
|                    | Wilcoxon signed-rank test | 0.10            | 0.95                      |                     |                     |      |
| 血清クレアチニン(mg/dL)    | 測定値                       | 0 週             | n                         | 69                  | 68                  |      |
|                    |                           |                 | Mean ±SD                  | 1.05 ±0.21          | 1.03 ±0.24          | 0.58 |
|                    |                           |                 | Median [Q1, Q3]           | 1.07 [0.87, 1.18]   | 0.98 [0.87, 1.18]   | 0.38 |
|                    |                           |                 | Min, Max                  | 0.65, 1.63          | 0.58, 1.71          |      |
|                    |                           | 12 週            | n                         | 69                  | 70                  |      |
|                    |                           |                 | Mean ±SD                  | 1.06 ±0.25          | 1.04 ±0.29          | 0.65 |
|                    |                           |                 | Median [Q1, Q3]           | 1.06 [0.84, 1.17]   | 0.97 [0.84, 1.22]   | 0.42 |
|                    |                           |                 | Min, Max                  | 0.70, 1.88          | 0.53, 2.00          |      |
|                    |                           | 24 週            | n                         | 67                  | 67                  |      |
|                    |                           |                 | Mean ±SD                  | 1.07 ±0.28          | 1.04 ±0.30          | 0.60 |
|                    |                           |                 | Median [Q1, Q3]           | 1.05 [0.83, 1.22]   | 0.96 [0.82, 1.25]   | 0.49 |
|                    |                           |                 |                           |                     |                     |      |

5. 副次評価項目  
5.1. FAS  
バイタルサイン、一般血液・尿検査

|                                      |                           |                           |                    |                    |      |  |
|--------------------------------------|---------------------------|---------------------------|--------------------|--------------------|------|--|
|                                      |                           | Min, Max                  | 0.57, 2.20         | 0.56, 2.01         |      |  |
|                                      | 変化量                       | 12 週                      | n                  | 68                 | 68   |  |
|                                      |                           | Mean ± SD                 | 0.02 ± 0.15        | 0.01 ± 0.18        | 0.67 |  |
|                                      |                           | Median [Q1, Q3]           | 0.02 [-0.05, 0.09] | 0.02 [-0.06, 0.08] | 0.78 |  |
|                                      |                           | Min, Max                  | -0.33, 0.78        | -0.86, 0.63        |      |  |
|                                      |                           | One-sample t-test         | 0.23               | 0.66               |      |  |
|                                      |                           | Wilcoxon signed-rank test | 0.22               | 0.45               |      |  |
|                                      | 24 週                      | n                         | 66                 | 65                 |      |  |
|                                      | Mean ± SD                 | 0.03 ± 0.17               | 0.02 ± 0.14        | 0.84               |      |  |
|                                      | Median [Q1, Q3]           | -0.01 [-0.05, 0.08]       | 0.02 [-0.09, 0.10] | 0.61               |      |  |
|                                      | Min, Max                  | -0.30, 0.74               | -0.35, 0.42        |                    |      |  |
|                                      | One-sample t-test         | 0.18                      | 0.20               |                    |      |  |
|                                      | Wilcoxon signed-rank test | 0.54                      | 0.21               |                    |      |  |
| クレアチニン・クリアランス<br>(mL/min)            | 測定値                       | 0 週                       | n                  | 69                 | 68   |  |
|                                      |                           | Mean ± SD                 | 64.1 ± 31.6        | 66.8 ± 29.7        | 0.61 |  |
|                                      |                           | Median [Q1, Q3]           | 55.9 [43.5, 80.4]  | 60.8 [45.4, 76.4]  | 0.35 |  |
|                                      |                           | Min, Max                  | 25.8, 204.0        | 31.4, 164.6        |      |  |
|                                      |                           | 12 週                      | n                  | 62                 | 65   |  |
|                                      |                           | Mean ± SD                 | 62.1 ± 30.6        | 66.3 ± 31.1        | 0.44 |  |
|                                      |                           | Median [Q1, Q3]           | 53.3 [41.0, 81.5]  | 57.1 [44.1, 82.1]  | 0.43 |  |
|                                      |                           | Min, Max                  | 21.6, 213.3        | 19.3, 182.2        |      |  |
|                                      |                           | 24 週                      | n                  | 64                 | 66   |  |
|                                      |                           | Mean ± SD                 | 63.5 ± 32.3        | 65.4 ± 32.0        | 0.73 |  |
|                                      |                           | Median [Q1, Q3]           | 56.2 [42.1, 78.5]  | 56.6 [39.9, 82.6]  | 0.82 |  |
|                                      |                           | Min, Max                  | 21.3, 216.7        | 24.7, 172.4        |      |  |
|                                      | 変化量                       | 12 週                      | n                  | 62                 | 63   |  |
|                                      |                           | Mean ± SD                 | -1.0 ± 5.3         | 0.1 ± 10.6         | 0.45 |  |
|                                      |                           | Median [Q1, Q3]           | -1.5 [-4.7, 1.6]   | -1.7 [-6.1, 5.8]   | 0.79 |  |
|                                      |                           | Min, Max                  | -12.6, 12.2        | -24.4, 45.6        |      |  |
|                                      |                           | One-sample t-test         | 0.14               | 0.92               |      |  |
|                                      |                           | Wilcoxon signed-rank test | 0.07               | 0.72               |      |  |
| 24 週                                 | n                         | 63                        | 64                 |                    |      |  |
| Mean ± SD                            | -0.6 ± 9.2                | -0.8 ± 9.3                | 0.88               |                    |      |  |
| Median [Q1, Q3]                      | 0.1 [-3.3, 3.4]           | -2.7 [-7.1, 5.4]          | 0.40               |                    |      |  |
| Min, Max                             | -41.3, 30.6               | -26.4, 24.4               |                    |                    |      |  |
| One-sample t-test                    | 0.61                      | 0.47                      |                    |                    |      |  |
| Wilcoxon signed-rank test            | 0.78                      | 0.27                      |                    |                    |      |  |
| eGFR<br>(mL/min/1.73m <sup>2</sup> ) | 測定値                       | 0 週                       | n                  | 69                 | 68   |  |
|                                      |                           | Mean ± SD                 | 54.4 ± 15.6        | 56.5 ± 16.8        | 0.46 |  |
|                                      |                           | Median [Q1, Q3]           | 51.1 [43.5, 65.8]  | 53.5 [43.6, 67.2]  | 0.58 |  |
|                                      |                           | Min, Max                  | 29.4, 94.2         | 30.1, 98.3         |      |  |
|                                      |                           | 12 週                      | n                  | 69                 | 70   |  |
|                                      |                           | Mean ± SD                 | 54.1 ± 15.7        | 56.3 ± 17.4        | 0.43 |  |
|                                      |                           | Median [Q1, Q3]           | 51.9 [43.6, 64.6]  | 53.2 [42.5, 69.4]  | 0.62 |  |
|                                      |                           | Min, Max                  | 20.6, 95.7         | 27.3, 99.6         |      |  |
|                                      |                           | 24 週                      | n                  | 67                 | 67   |  |
|                                      |                           | Mean ± SD                 | 54.1 ± 16.2        | 56.3 ± 18.1        | 0.46 |  |
|                                      |                           | Median [Q1, Q3]           | 51.8 [43.4, 68.4]  | 52.6 [41.5, 68.8]  | 0.68 |  |
|                                      |                           | Min, Max                  | 23.1, 95.0         | 27.2, 106.8        |      |  |

## 5. 副次評価項目

## 5.1. FAS

## バイタルサイン、一般血液・尿検査

|                            |                           |                           |                           |                      |                      |      |
|----------------------------|---------------------------|---------------------------|---------------------------|----------------------|----------------------|------|
|                            | 変化量                       | 12 週                      | n                         | 68                   | 68                   |      |
|                            |                           |                           | Mean ±SD                  | -0.6 ±5.9            | 0.3 ±8.6             | 0.50 |
|                            |                           |                           | Median [Q1, Q3]           | -0.6 [-4.0, 2.9]     | -1.0 [-4.7, 4.9]     | 0.72 |
|                            |                           |                           | Min, Max                  | -16.4, 16.2          | -17.0, 40.5          |      |
|                            |                           |                           | One-sample t-test         | 0.41                 | 0.79                 |      |
|                            |                           |                           | Wilcoxon signed-rank test | 0.39                 | 0.84                 |      |
|                            | 24 週                      | n                         | 66                        | 65                   |                      |      |
|                            |                           | Mean ±SD                  | -0.7 ±7.9                 | -0.1 ±7.4            | 0.69                 |      |
|                            |                           | Median [Q1, Q3]           | 0.3 [-4.2, 3.4]           | -1.5 [-5.3, 4.2]     | 0.67                 |      |
|                            |                           | Min, Max                  | -24.8, 28.3               | -14.4, 17.6          |                      |      |
|                            |                           | One-sample t-test         | 0.50                      | 0.90                 |                      |      |
|                            |                           | Wilcoxon signed-rank test | 0.61                      | 0.55                 |                      |      |
| 尿中クレアチン<br>(mg/dl)         | 測定値                       | 0 週                       | n                         | 58                   | 58                   |      |
|                            |                           |                           | Mean ±SD                  | 97.5 ±55.9           | 105.7 ±58.3          | 0.44 |
|                            |                           |                           | Median [Q1, Q3]           | 88.4 [62.7, 132.0]   | 99.5 [60.0, 155.0]   | 0.39 |
|                            |                           |                           | Min, Max                  | 14.0, 252.0          | 16.0, 277.0          |      |
|                            |                           | 12 週                      | n                         | 56                   | 58                   |      |
|                            |                           |                           | Mean ±SD                  | 100.2 ±65.6          | 92.3 ±67.6           | 0.53 |
|                            |                           |                           | Median [Q1, Q3]           | 90.0 [51.9, 126.5]   | 71.5 [42.0, 121.0]   | 0.40 |
|                            |                           |                           | Min, Max                  | 11.0, 334.0          | 7.0, 344.0           |      |
|                            |                           | 24 週                      | n                         | 56                   | 55                   |      |
|                            |                           |                           | Mean ±SD                  | 103.8 ±83.1          | 87.0 ±50.3           | 0.20 |
|                            |                           |                           | Median [Q1, Q3]           | 88.0 [53.0, 132.5]   | 83.0 [42.0, 130.0]   | 0.52 |
|                            |                           |                           | Min, Max                  | 14.8, 478.0          | 15.0, 238.0          |      |
|                            | 変化量                       | 12 週                      | n                         | 56                   | 57                   |      |
|                            |                           |                           | Mean ±SD                  | 1.5 ±75.5            | -14.7 ±74.6          | 0.25 |
|                            |                           |                           | Median [Q1, Q3]           | 8.6 [-31.8, 40.0]    | -9.0 [-56.0, 30.0]   | 0.25 |
|                            |                           |                           | Min, Max                  | -197.0, 280.0        | -214.0, 158.0        |      |
|                            |                           |                           | One-sample t-test         | 0.88                 | 0.14                 |      |
|                            |                           |                           | Wilcoxon signed-rank test | 0.71                 | 0.19                 |      |
| 24 週                       | n                         | 56                        | 54                        |                      |                      |      |
|                            | Mean ±SD                  | 4.7 ±81.5                 | -16.8 ±59.5               | 0.12                 |                      |      |
|                            | Median [Q1, Q3]           | 5.0 [-42.3, 36.5]         | -14.0 [-44.0, 18.0]       | 0.21                 |                      |      |
|                            | Min, Max                  | -180.0, 328.0             | -206.0, 120.0             |                      |                      |      |
|                            | One-sample t-test         | 0.67                      | 0.042                     |                      |                      |      |
|                            | Wilcoxon signed-rank test | 0.91                      | 0.039                     |                      |                      |      |
| 尿中浸透圧<br>(mOsm/Kg・<br>H2O) | 測定値                       | 0 週                       | n                         | 57                   | 59                   |      |
|                            |                           |                           | Mean ±SD                  | 517.4 ±191.9         | 555.8 ±194.7         | 0.29 |
|                            |                           |                           | Median [Q1, Q3]           | 521.0 [405.0, 657.0] | 588.0 [412.0, 700.0] | 0.30 |
|                            |                           |                           | Min, Max                  | 163.0, 946.0         | 188.0, 1018.0        |      |
|                            |                           | 12 週                      | n                         | 54                   | 58                   |      |
|                            |                           |                           | Mean ±SD                  | 497.2 ±152.8         | 519.8 ±186.1         | 0.49 |
|                            |                           |                           | Median [Q1, Q3]           | 512.5 [395.0, 598.0] | 515.0 [360.0, 652.0] | 0.53 |
|                            |                           |                           | Min, Max                  | 144.5, 987.0         | 192.0, 1130.0        |      |
|                            |                           | 24 週                      | n                         | 56                   | 54                   |      |
|                            |                           |                           | Mean ±SD                  | 537.4 ±193.2         | 496.8 ±194.9         | 0.27 |
|                            |                           |                           | Median [Q1, Q3]           | 550.0 [404.5, 690.5] | 476.5 [357.0, 629.0] | 0.30 |
|                            |                           |                           | Min, Max                  | 174.0, 1039.0        | 130.0, 863.0         |      |
|                            | 変化量                       | 12 週                      | n                         | 53                   | 58                   |      |

5. 副次評価項目

5.1. FAS

バイタルサイン、一般血液・尿検査

|  |      |                           |                      |                      |       |
|--|------|---------------------------|----------------------|----------------------|-------|
|  |      | Mean ± SD                 | -18.0 ± 187.7        | -37.6 ± 200.5        | 0.60  |
|  |      | Median [Q1, Q3]           | -20.0 [-147.0, 96.0] | -58.0 [-165.0, 75.0] | 0.43  |
|  |      | Min, Max                  | -503.5, 432.0        | -475.0, 594.0        |       |
|  |      | One-sample t-test         | 0.49                 | 0.16                 |       |
|  |      | Wilcoxon signed-rank test | 0.45                 | 0.07                 |       |
|  | 24 週 | n                         | 55                   | 54                   |       |
|  |      | Mean ± SD                 | 14.2 ± 186.7         | -56.5 ± 164.4        | 0.038 |
|  |      | Median [Q1, Q3]           | -8.0 [-113.0, 188.0] | -37.0 [-120.0, 15.0] | 0.06  |
|  |      | Min, Max                  | -381.0, 556.0        | -614.0, 447.0        |       |
|  |      | One-sample t-test         | 0.57                 | 0.015                |       |
|  |      | Wilcoxon signed-rank test | 0.79                 | 0.006                |       |

5. 副次評価項目  
5.1. FAS  
心臓超音波検査パラメーター

表 5.1.9. [FAS] 心臓超音波検査パラメーター

| 変数                           | 観察ポイント | 統計量                       | トピロキソスタット群        | アロプリノール群          | 群間比較 P 値 |  |
|------------------------------|--------|---------------------------|-------------------|-------------------|----------|--|
| 左室駆出率 (EF) (M.simpson 法) (%) | 測定値    | 0 週                       | n                 | 70                | 68       |  |
|                              |        | Mean ±SD                  | 52.4 ± 12.9       | 50.6 ± 13.3       | 0.42     |  |
|                              |        | Median [Q1, Q3]           | 55.0 [43.0, 61.8] | 54.7 [41.9, 60.5] | 0.52     |  |
|                              |        | Min, Max                  | 25.2, 74.0        | 19.3, 71.4        |          |  |
|                              | 24 週   | n                         | 65                | 65                |          |  |
|                              |        | Mean ±SD                  | 53.1 ± 12.5       | 52.6 ± 14.2       | 0.82     |  |
|                              |        | Median [Q1, Q3]           | 55.5 [43.0, 62.8] | 54.7 [44.4, 61.5] | 0.84     |  |
|                              |        | Min, Max                  | 20.7, 75.0        | 21.8, 77.7        |          |  |
|                              | 変化量    | 24 週                      | n                 | 65                | 63       |  |
|                              |        | Mean ±SD                  | -0.4 ± 5.6        | 1.6 ± 5.3         | 0.040    |  |
|                              |        | Median [Q1, Q3]           | -0.5 [-4.0, 3.0]  | 1.0 [-2.5, 4.0]   | 0.036    |  |
|                              |        | Min, Max                  | -13.7, 12.1       | -10.0, 17.0       |          |  |
|                              |        | One-sample t-test         | 0.53              | 0.022             |          |  |
|                              |        | Wilcoxon signed-rank test | 0.47              | 0.05              |          |  |
| 左室拡張末期径 (LVDd) (mm)          | 測定値    | 0 週                       | n                 | 68                | 70       |  |
|                              |        | Mean ±SD                  | 53.3 ± 8.3        | 53.2 ± 8.8        | 0.98     |  |
|                              |        | Median [Q1, Q3]           | 51.9 [47.8, 57.2] | 52.2 [47.0, 57.4] | 0.95     |  |
|                              |        | Min, Max                  | 38.1, 78.4        | 36.0, 76.2        |          |  |
|                              | 24 週   | n                         | 64                | 66                |          |  |
|                              |        | Mean ±SD                  | 51.3 ± 8.1        | 52.5 ± 9.6        | 0.44     |  |
|                              |        | Median [Q1, Q3]           | 50.3 [47.1, 56.1] | 51.4 [47.4, 56.7] | 0.42     |  |
|                              |        | Min, Max                  | 31.5, 72.4        | 10.5, 77.8        |          |  |
|                              | 変化量    | 24 週                      | n                 | 62                | 66       |  |
|                              |        | Mean ±SD                  | -1.0 ± 5.9        | -0.9 ± 6.5        | 0.89     |  |
|                              |        | Median [Q1, Q3]           | -1.0 [-4.3, 2.4]  | -0.4 [-3.5, 1.9]  | 0.76     |  |
|                              |        | Min, Max                  | -20.7, 16.2       | -36.3, 16.0       |          |  |
|                              |        | One-sample t-test         | 0.18              | 0.29              |          |  |
|                              |        | Wilcoxon signed-rank test | 0.21              | 0.38              |          |  |
| 左室収縮末期径 (LVDs) (mm)          | 測定値    | 0 週                       | n                 | 64                | 68       |  |
|                              |        | Mean ±SD                  | 38.9 ± 10.7       | 38.5 ± 11.2       | 0.81     |  |
|                              |        | Median [Q1, Q3]           | 36.7 [31.1, 46.5] | 36.4 [31.2, 44.3] | 0.89     |  |
|                              |        | Min, Max                  | 20.6, 68.2        | 12.7, 70.7        |          |  |
|                              | 24 週   | n                         | 63                | 63                |          |  |
|                              |        | Mean ±SD                  | 36.6 ± 9.3        | 38.5 ± 11.1       | 0.32     |  |
|                              |        | Median [Q1, Q3]           | 35.5 [29.7, 43.5] | 36.5 [31.3, 46.3] | 0.44     |  |
|                              |        | Min, Max                  | 20.0, 56.4        | 7.9, 69.9         |          |  |
|                              | 変化量    | 24 週                      | n                 | 57                | 61       |  |
|                              |        | Mean ±SD                  | -0.6 ± 5.4        | -0.1 ± 7.8        | 0.73     |  |
|                              |        | Median [Q1, Q3]           | -0.4 [-3.4, 2.8]  | -0.8 [-2.8, 2.9]  | 0.95     |  |
|                              |        | Min, Max                  | -17.2, 15.6       | -26.6, 39.3       |          |  |
|                              |        | One-sample t-test         | 0.42              | 0.89              |          |  |
|                              |        | Wilcoxon signed-rank test | 0.44              | 0.47              |          |  |
| 僧帽弁口血流速度波形 (E) (cm/sec)      | 測定値    | 0 週                       | n                 | 69                | 70       |  |
|                              |        | Mean ±SD                  | 81.8 ± 41.1       | 75.7 ± 37.1       | 0.36     |  |
|                              |        | Median [Q1, Q3]           | 73.5 [55.9, 93.0] | 65.6 [51.7, 87.9] | 0.30     |  |
|                              |        | Min, Max                  | 37.3, 268.0       | 26.4, 214.8       |          |  |

5. 副次評価項目  
5.1. FAS  
心臓超音波検査パラメーター

|                           |      |                 |                           |                      |                      |       |
|---------------------------|------|-----------------|---------------------------|----------------------|----------------------|-------|
|                           | 24 週 | n               | 66                        | 66                   |                      |       |
|                           |      | Mean ±SD        | 77.1 ±37.3                | 81.4 ±40.3           | 0.53                 |       |
|                           |      | Median [Q1, Q3] | 68.7 [55.1, 86.2]         | 73.4 [53.8, 92.9]    | 0.60                 |       |
|                           |      | Min, Max        | 25.3, 241.0               | 31.0, 245.5          |                      |       |
|                           | 変化量  | 24 週            | n                         | 66                   | 66                   |       |
|                           |      |                 | Mean ±SD                  | -4.2 ±16.7           | 5.3 ±21.9            | 0.006 |
|                           |      |                 | Median [Q1, Q3]           | -2.7 [-13.7, 6.0]    | 2.8 [-8.3, 13.3]     | 0.013 |
|                           |      |                 | Min, Max                  | -48.9, 44.2          | -42.8, 96.1          |       |
|                           |      |                 | One-sample t-test         | 0.046                | 0.05                 |       |
|                           |      |                 | Wilcoxon signed-rank test | 0.043                | 0.14                 |       |
| 僧帽弁口血流速度波形(A)<br>(cm/sec) | 測定値  | 0 週             | n                         | 35                   | 42                   |       |
|                           |      |                 | Mean ±SD                  | 67.5 ±25.3           | 74.0 ±25.5           | 0.27  |
|                           |      |                 | Median [Q1, Q3]           | 70.3 [48.0, 88.0]    | 68.7 [58.6, 83.0]    | 0.62  |
|                           |      |                 | Min, Max                  | 21.6, 113.0          | 30.9, 181.0          |       |
|                           |      | 24 週            | n                         | 34                   | 37                   |       |
|                           |      |                 | Mean ±SD                  | 62.4 ±25.1           | 73.2 ±23.7           | 0.07  |
|                           |      |                 | Median [Q1, Q3]           | 64.9 [50.7, 80.7]    | 70.0 [58.2, 86.4]    | 0.11  |
|                           |      |                 | Min, Max                  | 14.6, 119.0          | 26.9, 122.0          |       |
|                           | 変化量  | 24 週            | n                         | 32                   | 36                   |       |
|                           |      |                 | Mean ±SD                  | -3.5 ±18.0           | -3.4 ±21.1           | 0.97  |
|                           |      |                 | Median [Q1, Q3]           | -3.2 [-12.0, 6.0]    | -3.5 [-9.8, 6.0]     | 0.83  |
|                           |      |                 | Min, Max                  | -64.3, 48.4          | -100.0, 42.0         |       |
|                           |      |                 | One-sample t-test         | 0.28                 | 0.34                 |       |
|                           |      |                 | Wilcoxon signed-rank test | 0.18                 | 0.32                 |       |
| 僧帽弁口血流速度波形(DT)<br>(msec)  | 測定値  | 0 週             | n                         | 67                   | 69                   |       |
|                           |      |                 | Mean ±SD                  | 204.1 ±51.2          | 220.1 ±66.5          | 0.12  |
|                           |      |                 | Median [Q1, Q3]           | 188.5 [174.1, 225.0] | 204.6 [167.0, 253.5] | 0.25  |
|                           |      |                 | Min, Max                  | 105.6, 375.0         | 100.0, 400.0         |       |
|                           |      | 24 週            | n                         | 65                   | 66                   |       |
|                           |      |                 | Mean ±SD                  | 211.5 ±74.1          | 225.3 ±85.5          | 0.33  |
|                           |      |                 | Median [Q1, Q3]           | 184.0 [160.0, 240.0] | 198.6 [160.0, 258.0] | 0.55  |
|                           |      |                 | Min, Max                  | 24.0, 531.7          | 104.0, 544.0         |       |
|                           | 変化量  | 24 週            | n                         | 63                   | 65                   |       |
|                           |      |                 | Mean ±SD                  | 0.7 ±50.2            | -0.7 ±57.2           | 0.88  |
|                           |      |                 | Median [Q1, Q3]           | 0.0 [-27.0, 33.0]    | -7.6 [-32.0, 33.0]   | 0.57  |
|                           |      |                 | Min, Max                  | -160.0, 165.0        | -136.0, 156.2        |       |
|                           |      |                 | One-sample t-test         | 0.91                 | 0.92                 |       |
|                           |      |                 | Wilcoxon signed-rank test | 0.67                 | 0.78                 |       |
| 左室弁輪運動速度波形(E/e')          | 測定値  | 0 週             | n                         | 58                   | 67                   |       |
|                           |      |                 | Mean ±SD                  | 13.9 ±6.7            | 13.1 ±7.1            | 0.50  |
|                           |      |                 | Median [Q1, Q3]           | 12.7 [9.3, 16.4]     | 11.8 [8.5, 15.4]     | 0.38  |
|                           |      |                 | Min, Max                  | 4.4, 38.2            | 3.6, 46.2            |       |
|                           |      | 24 週            | n                         | 63                   | 64                   |       |
|                           |      |                 | Mean ±SD                  | 12.2 ±5.9            | 13.2 ±6.3            | 0.33  |
|                           |      |                 | Median [Q1, Q3]           | 10.5 [8.6, 13.8]     | 11.7 [9.3, 15.5]     | 0.20  |
|                           |      |                 | Min, Max                  | 4.9, 36.5            | 4.4, 34.5            |       |
|                           | 変化量  | 24 週            | n                         | 54                   | 62                   |       |
|                           |      |                 | Mean ±SD                  | -1.2 ±4.4            | 0.3 ±5.4             | 0.10  |
|                           |      | Median [Q1, Q3] | -0.8 [-4.0, 1.3]          | 0.7 [-3.2, 4.4]      | 0.10                 |       |

5. 副次評価項目  
5.1. FAS  
心臓超音波検査パラメーター

|                            |      |                 |                           |                   |                   |       |
|----------------------------|------|-----------------|---------------------------|-------------------|-------------------|-------|
|                            |      |                 | Min, Max                  | -10.5, 9.3        | -11.7, 13.9       |       |
|                            |      |                 | One-sample t-test         | 0.044             | 0.65              |       |
|                            |      |                 | Wilcoxon signed-rank test | 0.06              | 0.66              |       |
| 下大静脈径<br>(IVCd) (mm)       | 測定値  | 0 週             | n                         | 68                | 65                |       |
|                            |      |                 | Mean ± SD                 | 14.7 ± 5.4        | 14.1 ± 4.1        | 0.46  |
|                            |      |                 | Median [Q1, Q3]           | 14.7 [11.5, 17.0] | 13.6 [11.0, 16.7] | 0.56  |
|                            |      |                 | Min, Max                  | 4.2, 43.0         | 3.2, 27.0         |       |
|                            | 24 週 | n               | 65                        | 64                |                   |       |
|                            |      | Mean ± SD       | 16.0 ± 6.5                | 15.2 ± 5.9        | 0.47              |       |
|                            |      | Median [Q1, Q3] | 15.3 [12.4, 17.8]         | 14.6 [12.1, 17.2] | 0.47              |       |
|                            |      | Min, Max        | 8.0, 49.2                 | 7.8, 51.2         |                   |       |
|                            | 変化量  | 24 週            | n                         | 63                | 60                |       |
|                            |      |                 | Mean ± SD                 | 1.2 ± 5.8         | 0.9 ± 6.2         | 0.79  |
|                            |      |                 | Median [Q1, Q3]           | 0.8 [-3.1, 3.6]   | 0.7 [-2.3, 3.3]   | 0.85  |
|                            |      |                 | Min, Max                  | -6.8, 32.4        | -10.0, 36.5       |       |
|                            |      |                 | One-sample t-test         | 0.11              | 0.27              |       |
|                            |      |                 | Wilcoxon signed-rank test | 0.24              | 0.36              |       |
| 左房短径<br>(LAD) (mm)         | 測定値  | 0 週             | n                         | 70                | 68                |       |
|                            |      |                 | Mean ± SD                 | 45.5 ± 7.4        | 43.4 ± 7.9        | 0.11  |
|                            |      |                 | Median [Q1, Q3]           | 44.4 [40.0, 49.1] | 42.7 [38.7, 47.8] | 0.11  |
|                            |      |                 | Min, Max                  | 30.9, 63.2        | 26.0, 64.8        |       |
|                            | 24 週 | n               | 66                        | 66                |                   |       |
|                            |      | Mean ± SD       | 45.9 ± 7.5                | 44.3 ± 7.5        | 0.22              |       |
|                            |      | Median [Q1, Q3] | 45.0 [41.7, 49.5]         | 44.1 [38.8, 48.2] | 0.18              |       |
|                            |      | Min, Max        | 29.0, 66.8                | 31.8, 65.5        |                   |       |
|                            | 変化量  | 24 週            | n                         | 66                | 64                |       |
|                            |      |                 | Mean ± SD                 | 0.6 ± 4.9         | 0.9 ± 5.5         | 0.74  |
|                            |      |                 | Median [Q1, Q3]           | 0.6 [-1.9, 3.1]   | 1.1 [-2.4, 4.6]   | 0.71  |
|                            |      |                 | Min, Max                  | -13.6, 14.6       | -12.0, 20.6       |       |
|                            |      |                 | One-sample t-test         | 0.31              | 0.18              |       |
|                            |      |                 | Wilcoxon signed-rank test | 0.21              | 0.15              |       |
| 三尖弁圧較差<br>(TRPG)<br>(mmHg) | 測定値  | 0 週             | n                         | 60                | 55                |       |
|                            |      |                 | Mean ± SD                 | 23.7 ± 9.7        | 20.4 ± 7.4        | 0.047 |
|                            |      |                 | Median [Q1, Q3]           | 22.2 [17.5, 27.3] | 18.7 [16.2, 25.0] | 0.038 |
|                            |      |                 | Min, Max                  | 7.4, 70.3         | 4.0, 41.0         |       |
|                            | 24 週 | n               | 55                        | 52                |                   |       |
|                            |      | Mean ± SD       | 24.3 ± 7.6                | 22.4 ± 8.9        | 0.23              |       |
|                            |      | Median [Q1, Q3] | 23.5 [19.1, 28.2]         | 20.6 [16.4, 27.7] | 0.10              |       |
|                            |      | Min, Max        | 10.0, 46.0                | 10.0, 51.0        |                   |       |
|                            | 変化量  | 24 週            | n                         | 52                | 45                |       |
|                            |      |                 | Mean ± SD                 | 1.3 ± 5.5         | 2.7 ± 8.0         | 0.31  |
|                            |      |                 | Median [Q1, Q3]           | 1.0 [-1.8, 5.5]   | 2.0 [-1.0, 7.0]   | 0.27  |
|                            |      |                 | Min, Max                  | -12.1, 13.0       | -20.7, 23.7       |       |
|                            |      |                 | One-sample t-test         | 0.09              | 0.028             |       |
|                            |      |                 | Wilcoxon signed-rank test | 0.11              | 0.009             |       |



## 5. 副次評価項目

## 5.1. FAS

## 特殊血液検査

表 5.1.10. [FAS] 特殊血液検査

| 変数                           | 観察ポイント | 統計量                       | トピロキソスタット群                | アロプリノール群             | 群間比較 P 値             |      |
|------------------------------|--------|---------------------------|---------------------------|----------------------|----------------------|------|
| hsCRP(mg/dL)                 | 測定値    | 0 週                       | n                         | 69                   | 69                   |      |
|                              |        |                           | Mean ±SD                  | 0.16 ±0.17           | 0.12 ±0.13           | 0.11 |
|                              |        |                           | Median [Q1, Q3]           | 0.09 [0.03, 0.25]    | 0.06 [0.03, 0.14]    | 0.28 |
|                              |        |                           | Min, Max                  | 0.00, 0.50           | 0.01, 0.50           |      |
|                              |        | 12 週                      | n                         | 64                   | 65                   |      |
|                              |        |                           | Mean ±SD                  | 0.16 ±0.17           | 0.14 ±0.14           | 0.43 |
|                              |        |                           | Median [Q1, Q3]           | 0.08 [0.04, 0.25]    | 0.09 [0.04, 0.18]    | 0.85 |
|                              |        |                           | Min, Max                  | 0.00, 0.50           | 0.01, 0.50           |      |
|                              |        | 24 週                      | n                         | 65                   | 62                   |      |
|                              |        |                           | Mean ±SD                  | 0.17 ±0.17           | 0.13 ±0.14           | 0.18 |
|                              |        |                           | Median [Q1, Q3]           | 0.09 [0.05, 0.22]    | 0.07 [0.04, 0.18]    | 0.16 |
|                              |        |                           | Min, Max                  | 0.01, 0.50           | 0.01, 0.50           |      |
|                              | 変化量    | 12 週                      | n                         | 63                   | 64                   |      |
|                              |        |                           | Mean ±SD                  | 0.00 ±0.17           | 0.02 ±0.15           | 0.55 |
|                              |        |                           | Median [Q1, Q3]           | 0.00 [-0.02, 0.05]   | 0.01 [-0.03, 0.07]   | 0.77 |
|                              |        |                           | Min, Max                  | -0.44, 0.39          | -0.36, 0.47          |      |
|                              |        |                           | One-sample t-test         | 0.93                 | 0.33                 |      |
|                              |        |                           | Wilcoxon signed-rank test | 0.40                 | 0.24                 |      |
|                              |        | 24 週                      | n                         | 64                   | 61                   |      |
|                              |        |                           | Mean ±SD                  | 0.03 ±0.16           | 0.02 ±0.14           | 0.57 |
|                              |        |                           | Median [Q1, Q3]           | 0.01 [-0.01, 0.07]   | 0.00 [-0.01, 0.03]   | 0.34 |
|                              |        |                           | Min, Max                  | -0.45, 0.49          | -0.37, 0.41          |      |
|                              |        |                           | One-sample t-test         | 0.13                 | 0.39                 |      |
|                              |        |                           | Wilcoxon signed-rank test | 0.016                | 0.17                 |      |
| 変化率                          | 12 週   | n                         | 63                        | 64                   |                      |      |
|                              |        | Mean ±SD                  | 107.7 ±462.6              | 102.9 ±284.2         | 0.94                 |      |
|                              |        | Median [Q1, Q3]           | 1.1 [-41.5, 110.0]        | 24.0 [-35.5, 117.5]  | 0.53                 |      |
|                              |        | Min, Max                  | -90.2, 3266.7             | -91.5, 1751.9        |                      |      |
|                              |        | One-sample t-test         | 0.07                      | 0.005                |                      |      |
|                              |        | Wilcoxon signed-rank test | 0.05                      | 0.006                |                      |      |
|                              | 24 週   | n                         | 64                        | 61                   |                      |      |
|                              |        | Mean ±SD                  | 156.9 ±539.0              | 58.3 ±133.9          | 0.17                 |      |
|                              |        | Median [Q1, Q3]           | 26.7 [-14.0, 137.8]       | 16.4 [-18.8, 87.2]   | 0.38                 |      |
|                              |        | Min, Max                  | -93.9, 4066.7             | -90.1, 497.8         |                      |      |
|                              |        | One-sample t-test         | 0.023                     | 0.001                |                      |      |
|                              |        | Wilcoxon signed-rank test | <0.001                    | 0.004                |                      |      |
| 対数変換<br>hsCRP(ln<br>(mg/dL)) | 測定値    | 0 週                       | n                         | 69                   | 69                   |      |
|                              |        |                           | Mean ±SD                  | -2.50 ±1.24          | -2.72 ±1.10          | 0.28 |
|                              |        |                           | Median [Q1, Q3]           | -2.47 [-3.41, -1.37] | -2.86 [-3.54, -1.97] | 0.28 |
|                              |        |                           | Min, Max                  | -5.52, -0.69         | -4.96, -0.69         |      |
|                              |        | 12 週                      | n                         | 64                   | 65                   |      |
|                              |        |                           | Mean ±SD                  | -2.47 ±1.20          | -2.51 ±1.06          | 0.82 |
|                              |        |                           | Median [Q1, Q3]           | -2.58 [-3.32, -1.40] | -2.47 [-3.32, -1.74] | 0.85 |
|                              |        |                           | Min, Max                  | -5.52, -0.69         | -4.83, -0.69         |      |
|                              |        | 24 週                      | n                         | 65                   | 62                   |      |
|                              |        |                           | Mean ±SD                  | -2.30 ±1.11          | -2.55 ±1.05          | 0.19 |

## 5. 副次評価項目

## 5.1. FAS

## 特殊血液検査

|                           |                   |                           |                           |                      |                     |           |      |
|---------------------------|-------------------|---------------------------|---------------------------|----------------------|---------------------|-----------|------|
|                           |                   | Median [Q1, Q3]           | -2.38 [-3.02, -1.51]      | -2.66 [-3.19, -1.74] | 0.16                |           |      |
|                           |                   | Min, Max                  | -5.12, -0.69              | -4.42, -0.69         |                     |           |      |
| 変化量                       | 12 週              | n                         | 63                        | 64                   |                     |           |      |
|                           |                   | Mean ±SD                  | 0.09±0.98                 | 0.19±0.99            | 0.56                |           |      |
|                           |                   | Median [Q1, Q3]           | 0.01 [-0.54, 0.74]        | 0.22 [-0.44, 0.78]   | 0.53                |           |      |
|                           |                   | Min, Max                  | -2.32, 3.52               | -2.47, 2.92          |                     |           |      |
|                           |                   | One-sample t-test         | 0.48                      | 0.12                 |                     |           |      |
|                           |                   | Wilcoxon signed-rank test | 0.46                      | 0.12                 |                     |           |      |
|                           | 24 週              | n                         | 64                        | 61                   |                     |           |      |
|                           |                   | Mean ±SD                  | 0.32±1.02                 | 0.16±0.80            | 0.35                |           |      |
|                           |                   | Median [Q1, Q3]           | 0.24 [-0.15, 0.87]        | 0.15 [-0.21, 0.63]   | 0.38                |           |      |
|                           |                   | Min, Max                  | -2.80, 3.73               | -2.31, 1.79          |                     |           |      |
|                           |                   | One-sample t-test         | 0.015                     | 0.11                 |                     |           |      |
|                           |                   | Wilcoxon signed-rank test | 0.006                     | 0.048                |                     |           |      |
|                           | 変化率               | 12 週                      | n                         | 63                   | 64                  |           |      |
|                           |                   |                           | Mean ±SD                  | 13.8±73.1            | 5.1±59.6            | 0.46      |      |
| Median [Q1, Q3]           |                   |                           | -0.4 [-25.0, 17.2]        | -7.0 [-27.2, 18.0]   | 0.63                |           |      |
| Min, Max                  |                   |                           | -79.5, 303.5              | -80.8, 236.2         |                     |           |      |
| One-sample t-test         |                   |                           | 0.14                      | 0.50                 |                     |           |      |
| Wilcoxon signed-rank test |                   |                           | 0.84                      | 0.46                 |                     |           |      |
| 24 週                      |                   | n                         | 64                        | 61                   |                     |           |      |
|                           |                   | Mean ±SD                  | 1.8±71.4                  | 3.5±54.7             | 0.88                |           |      |
|                           |                   | Median [Q1, Q3]           | -8.1 [-26.7, 6.8]         | -4.1 [-17.9, 5.2]    | 0.35                |           |      |
|                           |                   | Min, Max                  | -84.3, 378.3              | -71.2, 263.2         |                     |           |      |
|                           |                   | One-sample t-test         | 0.84                      | 0.61                 |                     |           |      |
|                           |                   | Wilcoxon signed-rank test | 0.023                     | 0.18                 |                     |           |      |
| シスタチンC<br>(mg/L)          |                   | 測定値                       | 0 週                       | n                    | 70                  | 70        |      |
|                           |                   |                           |                           | Mean ±SD             | 1.18±0.27           | 1.17±0.32 | 0.86 |
|                           | Median [Q1, Q3]   |                           |                           | 1.17 [0.97, 1.34]    | 1.09 [0.93, 1.33]   | 0.62      |      |
|                           | Min, Max          |                           |                           | 0.70, 2.02           | 0.69, 2.08          |           |      |
|                           | 12 週              |                           | n                         | 65                   | 68                  |           |      |
|                           |                   |                           | Mean ±SD                  | 1.20±0.31            | 1.16±0.35           | 0.52      |      |
|                           |                   |                           | Median [Q1, Q3]           | 1.19 [0.98, 1.32]    | 1.11 [0.92, 1.30]   | 0.31      |      |
|                           |                   |                           | Min, Max                  | 0.70, 2.03           | 0.63, 2.41          |           |      |
|                           | 24 週              |                           | n                         | 66                   | 66                  |           |      |
|                           |                   |                           | Mean ±SD                  | 1.21±0.33            | 1.21±0.39           | 0.96      |      |
|                           |                   |                           | Median [Q1, Q3]           | 1.17 [0.98, 1.36]    | 1.14 [0.91, 1.36]   | 0.63      |      |
|                           |                   |                           | Min, Max                  | 0.73, 2.26           | 0.62, 2.34          |           |      |
|                           | 変化量               | 12 週                      | n                         | 65                   | 68                  |           |      |
|                           |                   |                           | Mean ±SD                  | 0.04±0.15            | 0.01±0.15           | 0.28      |      |
|                           |                   |                           | Median [Q1, Q3]           | 0.03 [-0.02, 0.08]   | -0.01 [-0.06, 0.09] | 0.23      |      |
|                           |                   |                           | Min, Max                  | -0.28, 0.55          | -0.60, 0.49         |           |      |
|                           |                   |                           | One-sample t-test         | 0.035                | 0.57                |           |      |
|                           |                   |                           | Wilcoxon signed-rank test | 0.031                | 0.58                |           |      |
|                           |                   | 24 週                      | n                         | 66                   | 66                  |           |      |
|                           |                   |                           | Mean ±SD                  | 0.05±0.18            | 0.05±0.17           | 0.88      |      |
|                           | Median [Q1, Q3]   | 0.03 [-0.03, 0.13]        | 0.04 [-0.04, 0.12]        | 0.87                 |                     |           |      |
|                           | Min, Max          | -0.32, 0.65               | -0.38, 1.03               |                      |                     |           |      |
|                           | One-sample t-test | 0.041                     | 0.022                     |                      |                     |           |      |

## 5. 副次評価項目

## 5.1. FAS

## 特殊血液検査

|                  |      |                           |                           |                    |                    |      |
|------------------|------|---------------------------|---------------------------|--------------------|--------------------|------|
|                  |      | Wilcoxon signed-rank test | 0.019                     | 0.008              |                    |      |
| 変化率              | 12 週 | n                         | 65                        | 68                 |                    |      |
|                  |      | Mean ±SD                  | 3.3 ± 10.9                | 1.3 ± 12.4         | 0.31               |      |
|                  |      | Median [Q1, Q3]           | 2.8 [-1.7, 7.4]           | -0.9 [-5.4, 8.2]   | 0.24               |      |
|                  |      | Min, Max                  | -16.0, 37.2               | -42.3, 41.4        |                    |      |
|                  |      | One-sample t-test         | 0.016                     | 0.40               |                    |      |
|                  |      | Wilcoxon signed-rank test | 0.020                     | 0.50               |                    |      |
|                  | 24 週 | n                         | 66                        | 66                 |                    |      |
|                  |      | Mean ±SD                  | 3.8 ± 12.9                | 4.1 ± 13.8         | 0.92               |      |
|                  |      | Median [Q1, Q3]           | 3.5 [-2.6, 10.0]          | 3.8 [-3.9, 12.1]   | 0.90               |      |
|                  |      | Min, Max                  | -27.0, 40.4               | -24.5, 78.6        |                    |      |
|                  |      | One-sample t-test         | 0.018                     | 0.019              |                    |      |
|                  |      | Wilcoxon signed-rank test | 0.015                     | 0.011              |                    |      |
| MDA-LDL<br>(U/L) | 測定値  | 0 週                       | n                         | 70                 | 70                 |      |
|                  |      |                           | Mean ±SD                  | 95.6 ± 31.8        | 96.2 ± 29.5        | 0.90 |
|                  |      |                           | Median [Q1, Q3]           | 96.5 [73.0, 114.0] | 96.0 [71.0, 114.0] | 0.98 |
|                  |      |                           | Min, Max                  | 30.0, 167.0        | 51.0, 170.0        |      |
|                  | 12 週 | n                         | 65                        | 68                 |                    |      |
|                  |      | Mean ±SD                  | 91.0 ± 34.4               | 85.8 ± 27.3        | 0.33               |      |
|                  |      | Median [Q1, Q3]           | 88.0 [67.0, 108.0]        | 80.5 [67.5, 102.5] | 0.54               |      |
|                  |      | Min, Max                  | 30.0, 188.0               | 31.0, 182.0        |                    |      |
|                  | 24 週 | n                         | 66                        | 66                 |                    |      |
|                  |      | Mean ±SD                  | 91.3 ± 33.1               | 87.4 ± 32.5        | 0.49               |      |
|                  |      | Median [Q1, Q3]           | 87.0 [69.0, 107.0]        | 80.5 [64.0, 103.0] | 0.34               |      |
|                  |      | Min, Max                  | 36.0, 196.0               | 35.0, 190.0        |                    |      |
|                  | 変化量  | 12 週                      | n                         | 65                 | 68                 |      |
|                  |      |                           | Mean ±SD                  | -4.8 ± 27.0        | -10.7 ± 25.9       | 0.20 |
|                  |      |                           | Median [Q1, Q3]           | -7.0 [-21.0, 10.0] | -7.0 [-29.0, 7.0]  | 0.32 |
|                  |      |                           | Min, Max                  | -72.0, 74.0        | -67.0, 46.0        |      |
|                  |      |                           | One-sample t-test         | 0.16               | 0.001              |      |
|                  |      |                           | Wilcoxon signed-rank test | 0.07               | 0.003              |      |
|                  |      | 24 週                      | n                         | 66                 | 66                 |      |
|                  |      |                           | Mean ±SD                  | -4.6 ± 26.9        | -8.1 ± 24.1        | 0.43 |
|                  |      |                           | Median [Q1, Q3]           | -4.5 [-19.0, 15.0] | -8.0 [-24.0, 3.0]  | 0.30 |
|                  |      |                           | Min, Max                  | -71.0, 54.0        | -70.0, 77.0        |      |
|                  |      |                           | One-sample t-test         | 0.17               | 0.008              |      |
|                  |      |                           | Wilcoxon signed-rank test | 0.33               | 0.003              |      |
| 変化率              | 12 週 | n                         | 65                        | 68                 |                    |      |
|                  |      | Mean ±SD                  | -1.3 ± 30.2               | -7.8 ± 26.3        | 0.19               |      |
|                  |      | Median [Q1, Q3]           | -6.4 [-20.9, 12.7]        | -7.8 [-29.7, 7.7]  | 0.27               |      |
|                  |      | Min, Max                  | -46.2, 119.5              | -47.5, 54.9        |                    |      |
|                  |      | One-sample t-test         | 0.73                      | 0.017              |                    |      |
|                  |      | Wilcoxon signed-rank test | 0.18                      | 0.012              |                    |      |
|                  | 24 週 | n                         | 66                        | 66                 |                    |      |
|                  |      | Mean ±SD                  | 0.0 ± 31.7                | -6.8 ± 23.4        | 0.16               |      |
|                  |      | Median [Q1, Q3]           | -3.8 [-21.6, 19.7]        | -7.4 [-20.0, 5.2]  | 0.30               |      |
|                  |      | Min, Max                  | -48.3, 131.7              | -56.5, 73.3        |                    |      |
|                  |      | One-sample t-test         | 0.99                      | 0.021              |                    |      |
|                  |      | Wilcoxon signed-rank test | 0.61                      | 0.005              |                    |      |

## 5. 副次評価項目

## 5.1. FAS

## 特殊血液検査

|                                              |     |      |                           |                      |                      |      |
|----------------------------------------------|-----|------|---------------------------|----------------------|----------------------|------|
| XOR 活性<br>(pmol/h/mL<br>plasma)              | 測定値 | 0 週  | n                         | 70                   | 70                   |      |
|                                              |     |      | Mean ±SD                  | 55.3±53.3            | 66.9±125.6           | 0.48 |
|                                              |     |      | Median [Q1, Q3]           | 33.8 [25.5, 61.5]    | 29.2 [18.1, 57.5]    | 0.12 |
|                                              |     |      | Min, Max                  | 8.0, 342.0           | 6.7, 946.0           |      |
|                                              |     | 24 週 | n                         | 66                   | 66                   |      |
|                                              |     |      | Mean ±SD                  | 23.1±33.6            | 29.5±45.0            | 0.36 |
|                                              |     |      | Median [Q1, Q3]           | 11.5 [6.7, 27.4]     | 12.7 [6.8, 24.4]     | 0.57 |
|                                              |     |      | Min, Max                  | 6.7, 250.0           | 6.7, 246.0           |      |
|                                              | 変化量 | 24 週 | n                         | 66                   | 66                   |      |
|                                              |     |      | Mean ±SD                  | -33.2±57.2           | -40.6±114.4          | 0.64 |
|                                              |     |      | Median [Q1, Q3]           | -21.8 [-43.4, -10.2] | -18.0 [-32.2, -8.2]  | 0.35 |
|                                              |     |      | Min, Max                  | -334.9, 182.2        | -868.1, 138.0        |      |
|                                              |     |      | One-sample t-test         | <0.001               | 0.005                |      |
|                                              |     |      | Wilcoxon signed-rank test | <0.001               | <0.001               |      |
|                                              | 変化率 | 24 週 | n                         | 66                   | 66                   |      |
|                                              |     |      | Mean ±SD                  | -49.6±54.5           | -44.1±45.5           | 0.53 |
|                                              |     |      | Median [Q1, Q3]           | -65.7 [-78.8, -48.1] | -55.0 [-70.7, -36.4] | 0.05 |
|                                              |     |      | Min, Max                  | -97.9, 268.7         | -91.8, 130.0         |      |
|                                              |     |      | One-sample t-test         | <0.001               | <0.001               |      |
| Wilcoxon signed-rank test                    |     |      | <0.001                    | <0.001               |                      |      |
| 対数変換 XOR<br>活性 (ln<br>(pmol/h/mL<br>plasma)) | 測定値 | 0 週  | n                         | 70                   | 70                   |      |
|                                              |     |      | Mean ±SD                  | 3.7±0.7              | 3.6±1.0              | 0.28 |
|                                              |     |      | Median [Q1, Q3]           | 3.5 [3.2, 4.1]       | 3.4 [2.9, 4.1]       | 0.12 |
|                                              |     |      | Min, Max                  | 2.1, 5.8             | 1.9, 6.9             |      |
|                                              |     | 24 週 | n                         | 66                   | 66                   |      |
|                                              |     |      | Mean ±SD                  | 2.7±0.8              | 2.8±0.9              | 0.48 |
|                                              |     |      | Median [Q1, Q3]           | 2.4 [1.9, 3.3]       | 2.5 [1.9, 3.2]       | 0.57 |
|                                              |     |      | Min, Max                  | 1.9, 5.5             | 1.9, 5.5             |      |
|                                              | 変化量 | 24 週 | n                         | 66                   | 66                   |      |
|                                              |     |      | Mean ±SD                  | -1.0±0.8             | -0.8±0.7             | 0.10 |
|                                              |     |      | Median [Q1, Q3]           | -1.1 [-1.5, -0.7]    | -0.8 [-1.2, -0.5]    | 0.05 |
|                                              |     |      | Min, Max                  | -3.9, 1.3            | -2.5, 0.8            |      |
|                                              |     |      | One-sample t-test         | <0.001               | <0.001               |      |
|                                              |     |      | Wilcoxon signed-rank test | <0.001               | <0.001               |      |
|                                              | 変化率 | 24 週 | n                         | 66                   | 66                   |      |
|                                              |     |      | Mean ±SD                  | -27.1±20.4           | -21.9±17.6           | 0.12 |
|                                              |     |      | Median [Q1, Q3]           | -31.3 [-43.6, -17.1] | -23.5 [-34.5, -12.3] | 0.06 |
|                                              |     |      | Min, Max                  | -66.3, 30.9          | -55.8, 26.6          |      |
|                                              |     |      | One-sample t-test         | <0.001               | <0.001               |      |
| Wilcoxon signed-rank test                    |     |      | <0.001                    | <0.001               |                      |      |

## 5. 副次評価項目

## 5.1. FAS

## 特殊尿検査

表 5.1.11. [FAS] 特殊尿検査

| 変数                        | 観察<br>ポイント | 統計量                       | トピロキソスタット群                | アロプリノール群          | 群間比較<br>P 値     |        |
|---------------------------|------------|---------------------------|---------------------------|-------------------|-----------------|--------|
| 8-OHdG<br>(ng/mg・Cr)      | 測定値        | 0 週                       | n                         | 70                | 70              |        |
|                           |            |                           | Mean ± SD                 | 7.7 ± 3.5         | 7.2 ± 4.0       | 0.47   |
|                           |            |                           | Median [Q1, Q3]           | 6.9 [5.4, 8.8]    | 6.6 [4.8, 9.0]  | 0.25   |
|                           |            |                           | Min, Max                  | 2.9, 22.3         | 2.1, 27.8       |        |
|                           |            | 12 週                      | n                         | 65                | 68              |        |
|                           |            |                           | Mean ± SD                 | 8.9 ± 3.7         | 10.1 ± 5.4      | 0.16   |
|                           |            |                           | Median [Q1, Q3]           | 8.2 [6.5, 10.3]   | 9.1 [7.0, 11.6] | 0.21   |
|                           |            |                           | Min, Max                  | 3.6, 20.7         | 4.3, 37.9       |        |
|                           |            | 24 週                      | n                         | 66                | 66              |        |
|                           |            |                           | Mean ± SD                 | 8.6 ± 4.1         | 10.2 ± 4.5      | 0.031  |
|                           |            |                           | Median [Q1, Q3]           | 8.3 [5.8, 9.6]    | 9.3 [7.6, 11.8] | 0.009  |
|                           |            |                           | Min, Max                  | 1.5, 24.9         | 3.6, 29.0       |        |
|                           | 変化量        | 12 週                      | n                         | 65                | 68              |        |
|                           |            |                           | Mean ± SD                 | 1.1 ± 3.4         | 2.8 ± 4.6       | 0.021  |
|                           |            |                           | Median [Q1, Q3]           | 1.1 [-0.4, 2.6]   | 2.6 [0.3, 4.6]  | 0.007  |
|                           |            |                           | Min, Max                  | -7.4, 12.7        | -10.1, 27.3     |        |
|                           |            |                           | One-sample t-test         | 0.011             | <0.001          |        |
|                           |            |                           | Wilcoxon signed-rank test | 0.002             | <0.001          |        |
|                           |            | 24 週                      | n                         | 66                | 66              |        |
|                           |            |                           | Mean ± SD                 | 1.0 ± 3.6         | 3.0 ± 3.1       | <0.001 |
|                           |            |                           | Median [Q1, Q3]           | 1.2 [-0.7, 2.6]   | 3.0 [1.0, 4.7]  | <0.001 |
|                           |            |                           | Min, Max                  | -9.9, 11.9        | -2.3, 10.6      |        |
|                           |            |                           | One-sample t-test         | 0.028             | <0.001          |        |
|                           |            |                           | Wilcoxon signed-rank test | 0.010             | <0.001          |        |
| 変化率                       | 12 週       | n                         | 65                        | 68                |                 |        |
|                           |            | Mean ± SD                 | 24.1 ± 46.5               | 52.2 ± 66.4       | 0.006           |        |
|                           |            | Median [Q1, Q3]           | 18.0 [-4.1, 40.7]         | 45.3 [3.6, 80.6]  | 0.010           |        |
|                           |            | Min, Max                  | -61.7, 158.8              | -43.0, 275.0      |                 |        |
|                           |            | One-sample t-test         | <0.001                    | <0.001            |                 |        |
|                           |            | Wilcoxon signed-rank test | <0.001                    | <0.001            |                 |        |
|                           | 24 週       | n                         | 66                        | 66                |                 |        |
|                           |            | Mean ± SD                 | 22.9 ± 52.8               | 58.7 ± 66.6       | <0.001          |        |
|                           |            | Median [Q1, Q3]           | 15.8 [-10.1, 39.8]        | 41.8 [12.7, 89.6] | <0.001          |        |
|                           |            | Min, Max                  | -83.0, 197.6              | -25.0, 296.4      |                 |        |
|                           |            | One-sample t-test         | <0.001                    | <0.001            |                 |        |
|                           |            | Wilcoxon signed-rank test | <0.001                    | <0.001            |                 |        |
| 尿中 L-FABP<br>(濃度) (ng/mL) | 測定値        | 0 週                       | n                         | 70                | 70              |        |
|                           |            |                           | Mean ± SD                 | 3.9 ± 3.9         | 5.1 ± 7.0       | 0.19   |
|                           |            |                           | Median [Q1, Q3]           | 2.3 [1.5, 3.7]    | 2.4 [1.6, 5.3]  | 0.36   |
|                           |            |                           | Min, Max                  | 1.5, 21.5         | 1.5, 36.3       |        |
|                           |            | 12 週                      | n                         | 65                | 68              |        |
|                           |            |                           | Mean ± SD                 | 3.5 ± 3.1         | 4.8 ± 7.5       | 0.22   |
|                           |            |                           | Median [Q1, Q3]           | 2.0 [1.5, 4.0]    | 2.2 [1.5, 5.0]  | 0.42   |
|                           |            |                           | Min, Max                  | 1.5, 12.8         | 1.5, 48.8       |        |
|                           |            | 24 週                      | n                         | 66                | 66              |        |
|                           |            |                           | Mean ± SD                 | 4.1 ± 4.9         | 5.3 ± 8.1       | 0.35   |

5. 副次評価項目

5.1. FAS

特殊尿検査

|                                       |                   |                           |                           |                    |                    |           |      |
|---------------------------------------|-------------------|---------------------------|---------------------------|--------------------|--------------------|-----------|------|
|                                       |                   | Median [Q1, Q3]           | 2.4 [1.5, 5.0]            | 2.1 [1.5, 6.6]     | 0.85               |           |      |
|                                       |                   | Min, Max                  | 1.5, 33.3                 | 1.5, 51.8          |                    |           |      |
| 変化量                                   | 12 週              | n                         | 65                        | 68                 |                    |           |      |
|                                       |                   | Mean ±SD                  | -0.3±3.7                  | 0.1±7.0            | 0.68               |           |      |
|                                       |                   | Median [Q1, Q3]           | 0.0 [-0.7, 0.5]           | 0.0 [-1.1, 0.9]    | 0.88               |           |      |
|                                       |                   | Min, Max                  | -13.4, 10.5               | -26.5, 32.6        |                    |           |      |
|                                       |                   | One-sample t-test         | 0.46                      | 0.95               |                    |           |      |
|                                       |                   | Wilcoxon signed-rank test | 0.89                      | 0.76               |                    |           |      |
|                                       | 24 週              | n                         | 66                        | 66                 |                    |           |      |
|                                       |                   | Mean ±SD                  | 0.7±4.3                   | 0.3±7.0            | 0.74               |           |      |
|                                       |                   | Median [Q1, Q3]           | 0.1 [-0.6, 1.2]           | 0.0 [-0.9, 0.9]    | 0.48               |           |      |
|                                       |                   | Min, Max                  | -9.8, 21.9                | -28.3, 33.4        |                    |           |      |
|                                       |                   | One-sample t-test         | 0.22                      | 0.71               |                    |           |      |
|                                       |                   | Wilcoxon signed-rank test | 0.22                      | 0.81               |                    |           |      |
|                                       | 変化率               | 12 週                      | n                         | 65                 | 68                 |           |      |
|                                       |                   |                           | Mean ±SD                  | 20.6±98.4          | 28.3±118.0         | 0.69      |      |
| Median [Q1, Q3]                       |                   |                           | 0.0 [-22.2, 33.3]         | 0.0 [-29.3, 35.8]  | 0.93               |           |      |
| Min, Max                              |                   |                           | -89.9, 552.6              | -86.7, 581.3       |                    |           |      |
| One-sample t-test                     |                   |                           | 0.10                      | 0.05               |                    |           |      |
| Wilcoxon signed-rank test             |                   |                           | 0.42                      | 0.56               |                    |           |      |
| 24 週                                  |                   | n                         | 66                        | 66                 |                    |           |      |
|                                       |                   | Mean ±SD                  | 38.7±106.8                | 52.1±249.9         | 0.69               |           |      |
|                                       |                   | Median [Q1, Q3]           | 2.2 [-20.7, 60.5]         | 0.0 [-30.9, 40.0]  | 0.35               |           |      |
|                                       |                   | Min, Max                  | -81.9, 416.7              | -85.2, 1855.6      |                    |           |      |
|                                       |                   | One-sample t-test         | 0.004                     | 0.10               |                    |           |      |
|                                       |                   | Wilcoxon signed-rank test | 0.037                     | 0.44               |                    |           |      |
| 対数変換 尿中<br>L-FABP(濃度)<br>(ln (ng/mL)) |                   | 測定値                       | 0 週                       | n                  | 70                 | 70        |      |
|                                       |                   |                           |                           | Mean ±SD           | 1.03±0.72          | 1.17±0.84 | 0.30 |
|                                       | Median [Q1, Q3]   |                           |                           | 0.83 [0.41, 1.31]  | 0.85 [0.47, 1.67]  | 0.36      |      |
|                                       | Min, Max          |                           |                           | 0.41, 3.07         | 0.41, 3.59         |           |      |
|                                       | 12 週              |                           | n                         | 65                 | 68                 |           |      |
|                                       |                   |                           | Mean ±SD                  | 0.98±0.69          | 1.09±0.82          | 0.39      |      |
|                                       |                   |                           | Median [Q1, Q3]           | 0.69 [0.41, 1.39]  | 0.79 [0.41, 1.60]  | 0.42      |      |
|                                       |                   |                           | Min, Max                  | 0.41, 2.55         | 0.41, 3.89         |           |      |
|                                       | 24 週              |                           | n                         | 66                 | 66                 |           |      |
|                                       |                   |                           | Mean ±SD                  | 1.09±0.73          | 1.13±0.89          | 0.74      |      |
|                                       |                   |                           | Median [Q1, Q3]           | 0.88 [0.41, 1.61]  | 0.72 [0.41, 1.89]  | 0.85      |      |
|                                       |                   |                           | Min, Max                  | 0.41, 3.51         | 0.41, 3.95         |           |      |
|                                       | 変化量               | 12 週                      | n                         | 65                 | 68                 |           |      |
|                                       |                   |                           | Mean ±SD                  | -0.04±0.71         | -0.04±0.76         | 0.98      |      |
|                                       |                   |                           | Median [Q1, Q3]           | 0.00 [-0.25, 0.29] | 0.00 [-0.35, 0.31] | 0.93      |      |
|                                       |                   |                           | Min, Max                  | -2.30, 1.88        | -2.02, 1.92        |           |      |
|                                       |                   |                           | One-sample t-test         | 0.63               | 0.67               |           |      |
|                                       |                   |                           | Wilcoxon signed-rank test | 0.95               | 0.80               |           |      |
|                                       |                   | 24 週                      | n                         | 66                 | 66                 |           |      |
|                                       |                   |                           | Mean ±SD                  | 0.10±0.68          | 0.01±0.79          | 0.49      |      |
|                                       | Median [Q1, Q3]   | 0.02 [-0.23, 0.47]        | 0.00 [-0.37, 0.34]        | 0.35               |                    |           |      |
|                                       | Min, Max          | -1.71, 1.64               | -1.91, 2.97               |                    |                    |           |      |
|                                       | One-sample t-test | 0.23                      | 0.90                      |                    |                    |           |      |

## 5. 副次評価項目

## 5.1. FAS

## 特殊尿検査

|                 |                                                             |                           |                           |                    |                 |           |      |
|-----------------|-------------------------------------------------------------|---------------------------|---------------------------|--------------------|-----------------|-----------|------|
|                 |                                                             | Wilcoxon signed-rank test | 0.19                      | 0.91               |                 |           |      |
| 変化率             | 12 週                                                        | n                         | 65                        | 68                 |                 |           |      |
|                 |                                                             | Mean ± SD                 | 14.9 ± 74.9               | 16.0 ± 74.8        | 0.93            |           |      |
|                 |                                                             | Median [Q1, Q3]           | 0.0 [-25.3, 48.9]         | 0.0 [-31.9, 46.2]  | 0.97            |           |      |
|                 |                                                             | Min, Max                  | -85.0, 339.8              | -82.5, 260.0       |                 |           |      |
|                 |                                                             | One-sample t-test         | 0.11                      | 0.08               |                 |           |      |
|                 |                                                             | Wilcoxon signed-rank test | 0.30                      | 0.43               |                 |           |      |
|                 | 24 週                                                        | n                         | 66                        | 66                 |                 |           |      |
|                 |                                                             | Mean ± SD                 | 32.0 ± 89.3               | 24.2 ± 104.8       | 0.65            |           |      |
|                 |                                                             | Median [Q1, Q3]           | 2.6 [-21.8, 49.1]         | 0.0 [-29.6, 36.4]  | 0.29            |           |      |
|                 |                                                             | Min, Max                  | -80.8, 396.9              | -82.5, 505.8       |                 |           |      |
|                 |                                                             | One-sample t-test         | 0.005                     | 0.07               |                 |           |      |
|                 |                                                             | Wilcoxon signed-rank test | 0.032                     | 0.52               |                 |           |      |
|                 | 尿中 L-FABP<br>(Cre 補正值)<br>( $\mu\text{g/g}\cdot\text{Cr}$ ) | 測定値                       | 0 週                       | n                  | 70              | 70        |      |
|                 |                                                             |                           |                           | Mean ± SD          | 5.1 ± 5.0       | 5.2 ± 6.0 | 0.95 |
| Median [Q1, Q3] |                                                             |                           |                           | 3.1 [1.9, 6.2]     | 3.3 [1.9, 5.7]  | 0.94      |      |
| Min, Max        |                                                             |                           |                           | 0.8, 25.1          | 0.8, 33.4       |           |      |
| 12 週            |                                                             | n                         | 65                        | 68                 |                 |           |      |
|                 |                                                             | Mean ± SD                 | 4.6 ± 5.7                 | 5.9 ± 7.2          | 0.24            |           |      |
|                 |                                                             | Median [Q1, Q3]           | 2.6 [2.0, 4.8]            | 3.5 [2.3, 6.8]     | 0.06            |           |      |
|                 |                                                             | Min, Max                  | 0.6, 39.1                 | 1.2, 47.2          |                 |           |      |
| 24 週            |                                                             | n                         | 66                        | 66                 |                 |           |      |
|                 |                                                             | Mean ± SD                 | 5.9 ± 9.4                 | 6.4 ± 7.0          | 0.73            |           |      |
|                 |                                                             | Median [Q1, Q3]           | 3.0 [1.8, 5.7]            | 3.5 [2.2, 8.6]     | 0.19            |           |      |
|                 |                                                             | Min, Max                  | 0.8, 55.7                 | 0.9, 37.5          |                 |           |      |
| 変化量             |                                                             | 12 週                      | n                         | 65                 | 68              |           |      |
|                 |                                                             |                           | Mean ± SD                 | -0.3 ± 5.0         | 1.1 ± 4.2       | 0.09      |      |
|                 |                                                             |                           | Median [Q1, Q3]           | 0.0 [-0.7, 0.8]    | 0.3 [-0.8, 2.1] | 0.11      |      |
|                 |                                                             |                           | Min, Max                  | -17.7, 20.5        | -8.7, 18.8      |           |      |
|                 |                                                             |                           | One-sample t-test         | 0.68               | 0.035           |           |      |
|                 |                                                             |                           | Wilcoxon signed-rank test | 0.78               | 0.07            |           |      |
|                 |                                                             | 24 週                      | n                         | 66                 | 66              |           |      |
|                 |                                                             |                           | Mean ± SD                 | 1.1 ± 7.7          | 1.3 ± 5.5       | 0.92      |      |
|                 |                                                             |                           | Median [Q1, Q3]           | -0.1 [-1.3, 1.0]   | 0.4 [-0.8, 2.2] | 0.32      |      |
|                 |                                                             |                           | Min, Max                  | -16.7, 38.0        | -15.8, 29.6     |           |      |
|                 |                                                             |                           | One-sample t-test         | 0.23               | 0.07            |           |      |
|                 |                                                             |                           | Wilcoxon signed-rank test | 0.98               | 0.09            |           |      |
| 変化率             | 12 週                                                        | n                         | 65                        | 68                 |                 |           |      |
|                 |                                                             | Mean ± SD                 | 11.8 ± 80.4               | 43.9 ± 107.4       | 0.05            |           |      |
|                 |                                                             | Median [Q1, Q3]           | 0.0 [-24.6, 30.8]         | 9.3 [-21.9, 68.8]  | 0.08            |           |      |
|                 |                                                             | Min, Max                  | -84.7, 490.0              | -65.8, 494.7       |                 |           |      |
|                 |                                                             | One-sample t-test         | 0.24                      | 0.001              |                 |           |      |
|                 |                                                             | Wilcoxon signed-rank test | 0.81                      | 0.005              |                 |           |      |
|                 | 24 週                                                        | n                         | 66                        | 66                 |                 |           |      |
|                 |                                                             | Mean ± SD                 | 33.0 ± 133.3              | 72.8 ± 231.2       | 0.23            |           |      |
|                 |                                                             | Median [Q1, Q3]           | -5.3 [-31.3, 50.0]        | 10.9 [-17.9, 70.5] | 0.14            |           |      |
|                 |                                                             | Min, Max                  | -79.9, 866.7              | -77.4, 1418.2      |                 |           |      |
|                 |                                                             | One-sample t-test         | 0.049                     | 0.013              |                 |           |      |
|                 |                                                             | Wilcoxon signed-rank test | 0.41                      | 0.003              |                 |           |      |

## 5. 副次評価項目

## 5.1. FAS

## 特殊尿検査

|                                                                |      |                           |                           |                     |                    |       |
|----------------------------------------------------------------|------|---------------------------|---------------------------|---------------------|--------------------|-------|
| 対数変換 尿中<br>L-FABP(Cre 補<br>正值) (ln<br>( $\mu$ g/g $\cdot$ Cr)) | 測定値  | 0 週                       | n                         | 70                  | 70                 |       |
|                                                                |      |                           | Mean $\pm$ SD             | 1.28 $\pm$ 0.82     | 1.28 $\pm$ 0.80    | 0.96  |
|                                                                |      |                           | Median [Q1, Q3]           | 1.13 [0.64, 1.82]   | 1.19 [0.64, 1.74]  | 0.94  |
|                                                                |      |                           | Min, Max                  | -0.22, 3.22         | -0.22, 3.51        |       |
|                                                                |      | 12 週                      | n                         | 65                  | 68                 |       |
|                                                                |      |                           | Mean $\pm$ SD             | 1.15 $\pm$ 0.77     | 1.40 $\pm$ 0.80    | 0.07  |
|                                                                |      |                           | Median [Q1, Q3]           | 0.96 [0.69, 1.57]   | 1.25 [0.81, 1.92]  | 0.06  |
|                                                                |      |                           | Min, Max                  | -0.51, 3.67         | 0.18, 3.85         |       |
|                                                                |      | 24 週                      | n                         | 66                  | 66                 |       |
|                                                                |      |                           | Mean $\pm$ SD             | 1.26 $\pm$ 0.90     | 1.45 $\pm$ 0.87    | 0.22  |
|                                                                |      |                           | Median [Q1, Q3]           | 1.10 [0.59, 1.74]   | 1.24 [0.79, 2.15]  | 0.19  |
|                                                                |      |                           | Min, Max                  | -0.22, 4.02         | -0.11, 3.62        |       |
|                                                                | 変化量  | 12 週                      | n                         | 65                  | 68                 |       |
|                                                                |      |                           | Mean $\pm$ SD             | -0.08 $\pm$ 0.65    | 0.16 $\pm$ 0.61    | 0.026 |
|                                                                |      |                           | Median [Q1, Q3]           | 0.00 [-0.28, 0.27]  | 0.09 [-0.25, 0.52] | 0.08  |
|                                                                |      |                           | Min, Max                  | -1.88, 1.77         | -1.07, 1.78        |       |
|                                                                |      |                           | One-sample t-test         | 0.31                | 0.029              |       |
|                                                                |      |                           | Wilcoxon signed-rank test | 0.69                | 0.045              |       |
|                                                                |      | 24 週                      | n                         | 66                  | 66                 |       |
|                                                                |      |                           | Mean $\pm$ SD             | 0.02 $\pm$ 0.68     | 0.20 $\pm$ 0.74    | 0.17  |
|                                                                |      |                           | Median [Q1, Q3]           | -0.05 [-0.37, 0.41] | 0.10 [-0.20, 0.53] | 0.14  |
|                                                                |      |                           | Min, Max                  | -1.60, 2.27         | -1.49, 2.72        |       |
|                                                                |      |                           | One-sample t-test         | 0.78                | 0.036              |       |
|                                                                |      |                           | Wilcoxon signed-rank test | 0.95                | 0.05               |       |
| 変化率                                                            | 12 週 | n                         | 65                        | 68                  |                    |       |
|                                                                |      | Mean $\pm$ SD             | 31.6 $\pm$ 148.8          | 60.6 $\pm$ 251.1    | 0.42               |       |
|                                                                |      | Median [Q1, Q3]           | 0.0 [-24.0, 26.3]         | 5.8 [-19.2, 48.4]   | 0.30               |       |
|                                                                |      | Min, Max                  | -84.7, 902.5              | -349.0, 1454.5      |                    |       |
|                                                                |      | One-sample t-test         | 0.09                      | 0.05                |                    |       |
|                                                                |      | Wilcoxon signed-rank test | 0.75                      | 0.08                |                    |       |
|                                                                | 24 週 | n                         | 66                        | 66                  |                    |       |
|                                                                |      | Mean $\pm$ SD             | 30.8 $\pm$ 179.5          | 48.2 $\pm$ 445.0    | 0.77               |       |
|                                                                |      | Median [Q1, Q3]           | -5.7 [-36.8, 37.5]        | 8.1 [-19.1, 49.4]   | 0.24               |       |
|                                                                |      | Min, Max                  | -181.7, 1244.3            | -1173.8, 2853.9     |                    |       |
|                                                                |      | One-sample t-test         | 0.17                      | 0.38                |                    |       |
|                                                                |      | Wilcoxon signed-rank test | 0.97                      | 0.09                |                    |       |
| 尿中アルブミン<br>(アルブミン) ( $\mu$<br>g/mL)                            | 測定値  | 0 週                       | n                         | 70                  | 70                 |       |
|                                                                |      |                           | Mean $\pm$ SD             | 97.3 $\pm$ 245.9    | 166.8 $\pm$ 661.0  | 0.41  |
|                                                                |      |                           | Median [Q1, Q3]           | 13.8 [5.5, 50.5]    | 20.7 [7.3, 67.2]   | 0.26  |
|                                                                |      |                           | Min, Max                  | 0.5, 1402.6         | 0.6, 4566.9        |       |
|                                                                |      | 12 週                      | n                         | 65                  | 69                 |       |
|                                                                |      |                           | Mean $\pm$ SD             | 104.4 $\pm$ 337.7   | 114.0 $\pm$ 272.5  | 0.86  |
|                                                                |      |                           | Median [Q1, Q3]           | 9.4 [4.5, 37.4]     | 17.4 [6.6, 55.8]   | 0.15  |
|                                                                |      |                           | Min, Max                  | 0.5, 2209.6         | 0.6, 1628.5        |       |
|                                                                |      | 24 週                      | n                         | 66                  | 66                 |       |
|                                                                |      |                           | Mean $\pm$ SD             | 68.0 $\pm$ 175.6    | 145.4 $\pm$ 696.2  | 0.38  |
|                                                                |      |                           | Median [Q1, Q3]           | 13.0 [5.6, 48.7]    | 16.3 [4.3, 40.7]   | 0.68  |
|                                                                |      |                           | Min, Max                  | 0.7, 1024.8         | 0.8, 5627.4        |       |
|                                                                | 変化量  | 12 週                      | n                         | 65                  | 69                 |       |



5. 副次評価項目

5.1. FAS

特殊尿検査

|                                                   |                           |                           |                    |                     |                     |      |
|---------------------------------------------------|---------------------------|---------------------------|--------------------|---------------------|---------------------|------|
|                                                   |                           | Mean ± SD                 | 2.3 ± 292.2        | -54.7 ± 601.7       | 0.49                |      |
|                                                   |                           | Median [Q1, Q3]           | -0.2 [-5.5, 3.4]   | -3.0 [-14.1, 6.8]   | 0.46                |      |
|                                                   |                           | Min, Max                  | -1102.5, 1630.7    | -4135.9, 1401.0     |                     |      |
|                                                   |                           | One-sample t-test         | 0.95               | 0.45                |                     |      |
|                                                   |                           | Wilcoxon signed-rank test | 0.49               | 0.21                |                     |      |
|                                                   |                           | 24 週                      | n                  | 66                  | 66                  |      |
|                                                   |                           | Mean ± SD                 | -24.6 ± 229.3      | -26.1 ± 621.0       | 0.99                |      |
|                                                   |                           | Median [Q1, Q3]           | 0.1 [-7.7, 6.4]    | -2.0 [-11.1, 4.7]   | 0.48                |      |
|                                                   |                           | Min, Max                  | -1079.0, 720.9     | -4202.7, 2500.1     |                     |      |
|                                                   |                           | One-sample t-test         | 0.39               | 0.73                |                     |      |
|                                                   | Wilcoxon signed-rank test | 0.78                      | 0.19               |                     |                     |      |
|                                                   | 変化率                       | 12 週                      | n                  | 65                  | 69                  |      |
|                                                   |                           |                           | Mean ± SD          | 47.6 ± 221.9        | 105.1 ± 364.1       | 0.28 |
|                                                   |                           |                           | Median [Q1, Q3]    | -1.2 [-40.0, 59.5]  | -14.5 [-66.0, 86.0] | 0.93 |
|                                                   |                           |                           | Min, Max           | -99.4, 1565.5       | -95.7, 2425.0       |      |
|                                                   |                           |                           | One-sample t-test  | 0.09                | 0.019               |      |
|                                                   |                           | Wilcoxon signed-rank test | 0.51               | 0.61                |                     |      |
|                                                   |                           | 24 週                      | n                  | 66                  | 66                  |      |
|                                                   |                           |                           | Mean ± SD          | 71.8 ± 232.5        | 71.0 ± 269.0        | 0.99 |
|                                                   |                           |                           | Median [Q1, Q3]    | 3.6 [-49.1, 58.7]   | -14.7 [-61.9, 48.5] | 0.39 |
| Min, Max                                          |                           |                           | -93.4, 1118.6      | -92.0, 1366.7       |                     |      |
| One-sample t-test                                 | 0.015                     |                           | 0.036              |                     |                     |      |
| Wilcoxon signed-rank test                         | 0.36                      | 0.75                      |                    |                     |                     |      |
| 対数変換 尿中<br>アルブミン(アル<br>ブミン) (ln<br>( $\mu$ g/mL)) | 測定値                       | 0 週                       | n                  | 70                  | 70                  |      |
|                                                   |                           |                           | Mean ± SD          | 2.84 ± 1.77         | 3.11 ± 1.76         | 0.37 |
|                                                   |                           |                           | Median [Q1, Q3]    | 2.62 [1.70, 3.92]   | 3.03 [1.99, 4.21]   | 0.26 |
|                                                   |                           |                           | Min, Max           | -0.69, 7.25         | -0.51, 8.43         |      |
|                                                   |                           | 12 週                      | n                  | 65                  | 69                  |      |
|                                                   |                           |                           | Mean ± SD          | 2.63 ± 1.76         | 3.00 ± 1.88         | 0.24 |
|                                                   |                           |                           | Median [Q1, Q3]    | 2.24 [1.50, 3.62]   | 2.86 [1.89, 4.02]   | 0.15 |
|                                                   |                           |                           | Min, Max           | -0.69, 7.70         | -0.51, 7.40         |      |
|                                                   |                           | 24 週                      | n                  | 66                  | 66                  |      |
|                                                   |                           |                           | Mean ± SD          | 2.74 ± 1.63         | 2.89 ± 1.72         | 0.60 |
|                                                   |                           |                           | Median [Q1, Q3]    | 2.56 [1.72, 3.89]   | 2.79 [1.46, 3.71]   | 0.68 |
|                                                   |                           |                           | Min, Max           | -0.36, 6.93         | -0.22, 8.64         |      |
|                                                   | 変化量                       | 12 週                      | n                  | 65                  | 69                  |      |
|                                                   |                           |                           | Mean ± SD          | -0.19 ± 1.22        | -0.10 ± 1.27        | 0.68 |
|                                                   |                           |                           | Median [Q1, Q3]    | -0.01 [-0.51, 0.47] | -0.16 [-1.08, 0.62] | 0.93 |
|                                                   |                           |                           | Min, Max           | -5.11, 2.81         | -3.15, 3.23         |      |
|                                                   |                           |                           | One-sample t-test  | 0.21                | 0.50                |      |
|                                                   |                           | Wilcoxon signed-rank test | 0.39               | 0.39                |                     |      |
| 24 週                                              |                           | n                         | 66                 | 66                  |                     |      |
|                                                   |                           | Mean ± SD                 | -0.05 ± 1.10       | -0.14 ± 1.09        | 0.63                |      |
|                                                   |                           | Median [Q1, Q3]           | 0.03 [-0.68, 0.46] | -0.16 [-0.96, 0.40] | 0.39                |      |
|                                                   |                           | Min, Max                  | -2.72, 2.50        | -2.53, 2.69         |                     |      |
|                                                   | One-sample t-test         | 0.72                      | 0.31               |                     |                     |      |
| Wilcoxon signed-rank test                         | 0.74                      | 0.14                      |                    |                     |                     |      |
| 変化率                                               | 12 週                      | n                         | 64                 | 69                  |                     |      |
|                                                   |                           | Mean ± SD                 | 8.7 ± 71.4         | 8.2 ± 247.8         | 0.99                |      |

## 5. 副次評価項目

## 5.1. FAS

## 特殊尿検査

|                                   |      |                           |                           |                     |                     |       |
|-----------------------------------|------|---------------------------|---------------------------|---------------------|---------------------|-------|
|                                   |      |                           | Median [Q1, Q3]           | -1.2 [-22.5, 21.1]  | -6.1 [-37.7, 17.4]  | 0.45  |
|                                   |      |                           | Min, Max                  | -83.9, 306.9        | -848.3, 1771.0      |       |
|                                   |      |                           | One-sample t-test         | 0.33                | 0.78                |       |
|                                   |      |                           | Wilcoxon signed-rank test | 0.76                | 0.23                |       |
|                                   |      | 24 週                      | n                         | 65                  | 66                  |       |
|                                   |      |                           | Mean ± SD                 | 21.2 ± 139.9        | -7.7 ± 328.3        | 0.51  |
|                                   |      |                           | Median [Q1, Q3]           | -1.8 [-27.4, 24.7]  | -6.1 [-29.8, 10.9]  | 0.32  |
|                                   |      |                           | Min, Max                  | -95.0, 1054.1       | -2226.7, 1294.0     |       |
|                                   |      |                           | One-sample t-test         | 0.23                | 0.85                |       |
|                                   |      |                           | Wilcoxon signed-rank test | 0.98                | 0.11                |       |
| 尿中アルブミン<br>(クレアチニン)<br>(mg/dL)    | 測定値  | 0 週                       | n                         | 70                  | 70                  |       |
|                                   |      |                           | Mean ± SD                 | 97.6 ± 57.5         | 107.3 ± 56.6        | 0.32  |
|                                   |      |                           | Median [Q1, Q3]           | 86.5 [52.9, 139.7]  | 98.6 [64.8, 151.4]  | 0.29  |
|                                   |      |                           | Min, Max                  | 7.2, 251.0          | 14.8, 273.2         |       |
|                                   |      | 12 週                      | n                         | 65                  | 69                  |       |
|                                   |      |                           | Mean ± SD                 | 102.3 ± 62.2        | 94.9 ± 67.7         | 0.51  |
|                                   |      |                           | Median [Q1, Q3]           | 87.3 [57.1, 134.4]  | 74.3 [42.8, 122.8]  | 0.31  |
|                                   |      |                           | Min, Max                  | 11.0, 329.8         | 6.7, 358.9          |       |
|                                   |      | 24 週                      | n                         | 66                  | 66                  |       |
|                                   |      |                           | Mean ± SD                 | 110.3 ± 97.2        | 87.4 ± 49.0         | 0.09  |
|                                   |      |                           | Median [Q1, Q3]           | 86.4 [55.4, 141.8]  | 83.6 [54.6, 120.4]  | 0.32  |
|                                   |      |                           | Min, Max                  | 13.8, 563.6         | 16.6, 283.0         |       |
|                                   | 変化量  | 12 週                      | n                         | 65                  | 69                  |       |
|                                   |      |                           | Mean ± SD                 | 3.6 ± 71.8          | -13.3 ± 71.2        | 0.17  |
|                                   |      |                           | Median [Q1, Q3]           | 6.7 [-29.7, 47.3]   | -7.5 [-52.3, 33.0]  | 0.16  |
|                                   |      |                           | Min, Max                  | -193.9, 276.8       | -204.5, 174.8       |       |
|                                   |      |                           | One-sample t-test         | 0.69                | 0.13                |       |
|                                   |      |                           | Wilcoxon signed-rank test | 0.47                | 0.17                |       |
|                                   |      | 24 週                      | n                         | 66                  | 66                  |       |
|                                   |      |                           | Mean ± SD                 | 13.1 ± 88.1         | -17.3 ± 58.4        | 0.021 |
|                                   |      |                           | Median [Q1, Q3]           | 3.7 [-24.8, 38.4]   | -12.2 [-51.5, 11.9] | 0.041 |
|                                   |      |                           | Min, Max                  | -174.6, 387.5       | -204.8, 131.0       |       |
|                                   |      |                           | One-sample t-test         | 0.23                | 0.019               |       |
|                                   |      |                           | Wilcoxon signed-rank test | 0.48                | 0.027               |       |
| 変化率                               | 12 週 | n                         | 65                        | 69                  |                     |       |
|                                   |      | Mean ± SD                 | 47.2 ± 145.8              | 6.1 ± 76.8          | 0.041               |       |
|                                   |      | Median [Q1, Q3]           | 7.6 [-35.0, 47.4]         | -7.3 [-47.2, 38.1]  | 0.12                |       |
|                                   |      | Min, Max                  | -93.8, 553.3              | -91.3, 320.3        |                     |       |
|                                   |      | One-sample t-test         | 0.011                     | 0.51                |                     |       |
|                                   |      | Wilcoxon signed-rank test | 0.12                      | 0.73                |                     |       |
|                                   | 24 週 | n                         | 66                        | 66                  |                     |       |
|                                   |      | Mean ± SD                 | 42.0 ± 111.8              | 5.2 ± 89.6          | 0.039               |       |
|                                   |      | Median [Q1, Q3]           | 5.1 [-24.9, 71.7]         | -16.6 [-39.0, 20.7] | 0.024               |       |
|                                   |      | Min, Max                  | -86.1, 492.5              | -92.3, 519.8        |                     |       |
|                                   |      | One-sample t-test         | 0.003                     | 0.64                |                     |       |
|                                   |      | Wilcoxon signed-rank test | 0.045                     | 0.15                |                     |       |
| 対数変換 尿中<br>アルブミン(クレ<br>アチニン) (ln) | 測定値  | 0 週                       | n                         | 70                  | 70                  |       |
|                                   |      |                           | Mean ± SD                 | 4.35 ± 0.77         | 4.50 ± 0.65         | 0.22  |
|                                   |      |                           | Median [Q1, Q3]           | 4.46 [3.97, 4.94]   | 4.59 [4.17, 5.02]   | 0.29  |

## 5. 副次評価項目

## 5.1. FAS

## 特殊尿検査

|                                         |      |                           |                           |                    |                     |       |
|-----------------------------------------|------|---------------------------|---------------------------|--------------------|---------------------|-------|
| (mg/dL))                                |      | Min, Max                  | 1.97, 5.53                | 2.69, 5.61         |                     |       |
|                                         | 12 週 | n                         | 65                        | 69                 |                     |       |
|                                         |      | Mean ±SD                  | 4.43±0.68                 | 4.28±0.80          | 0.25                |       |
|                                         |      | Median [Q1, Q3]           | 4.47 [4.04, 4.90]         | 4.31 [3.76, 4.81]  | 0.31                |       |
|                                         |      | Min, Max                  | 2.39, 5.80                | 1.89, 5.88         |                     |       |
|                                         | 24 週 | n                         | 66                        | 66                 |                     |       |
|                                         |      | Mean ±SD                  | 4.44±0.73                 | 4.30±0.64          | 0.24                |       |
|                                         |      | Median [Q1, Q3]           | 4.46 [4.01, 4.95]         | 4.43 [4.00, 4.79]  | 0.32                |       |
|                                         |      | Min, Max                  | 2.62, 6.33                | 2.81, 5.65         |                     |       |
|                                         | 変化量  | 12 週                      | n                         | 65                 | 69                  |       |
|                                         |      |                           | Mean ±SD                  | 0.04±0.84          | -0.23±0.84          | 0.06  |
|                                         |      |                           | Median [Q1, Q3]           | 0.07 [-0.43, 0.39] | -0.08 [-0.64, 0.32] | 0.12  |
|                                         |      |                           | Min, Max                  | -2.78, 1.88        | -2.44, 1.44         |       |
|                                         |      |                           | One-sample t-test         | 0.67               | 0.027               |       |
|                                         |      |                           | Wilcoxon signed-rank test | 0.52               | 0.10                |       |
|                                         |      | 24 週                      | n                         | 66                 | 66                  |       |
|                                         |      |                           | Mean ±SD                  | 0.08±0.76          | -0.18±0.69          | 0.037 |
|                                         |      |                           | Median [Q1, Q3]           | 0.05 [-0.29, 0.54] | -0.18 [-0.49, 0.19] | 0.024 |
|                                         |      |                           | Min, Max                  | -1.97, 1.78        | -2.57, 1.82         |       |
|                                         |      |                           | One-sample t-test         | 0.37               | 0.037               |       |
|                                         |      |                           | Wilcoxon signed-rank test | 0.30               | 0.024               |       |
|                                         | 変化率  | 12 週                      | n                         | 65                 | 69                  |       |
|                                         |      |                           | Mean ±SD                  | 3.7±23.2           | -3.8±18.8           | 0.040 |
|                                         |      |                           | Median [Q1, Q3]           | 1.6 [-8.7, 9.1]    | -1.7 [-16.1, 7.0]   | 0.12  |
| Min, Max                                |      |                           | -53.7, 95.2               | -56.3, 45.7        |                     |       |
| One-sample t-test                       |      |                           | 0.20                      | 0.09               |                     |       |
| Wilcoxon signed-rank test               |      |                           | 0.43                      | 0.16               |                     |       |
| 24 週                                    |      | n                         | 66                        | 66                 |                     |       |
|                                         |      | Mean ±SD                  | 4.2±20.7                  | -2.7±16.3          | 0.033               |       |
|                                         |      | Median [Q1, Q3]           | 1.1 [-6.5, 13.9]          | -4.2 [-11.9, 4.4]  | 0.018               |       |
|                                         |      | Min, Max                  | -39.0, 81.3               | -47.6, 58.1        |                     |       |
|                                         |      | One-sample t-test         | 0.10                      | 0.18               |                     |       |
|                                         |      | Wilcoxon signed-rank test | 0.17                      | 0.041              |                     |       |
| 尿中アルブミン<br>(クレアチニン補<br>正值) (mg/g<br>Cr) | 測定値  | 0 週                       | n                         | 69                 | 70                  |       |
|                                         |      |                           | Mean ±SD                  | 129.5±348.2        | 156.0±550.7         | 0.74  |
|                                         |      |                           | Median [Q1, Q3]           | 14.3 [6.0, 79.6]   | 19.7 [6.9, 57.2]    | 0.56  |
|                                         |      |                           | Min, Max                  | 1.6, 2366.9        | 1.9, 3560.1         |       |
|                                         | 12 週 | n                         | 65                        | 69                 |                     |       |
|                                         |      | Mean ±SD                  | 108.1±390.7               | 166.0±559.4        | 0.49                |       |
|                                         |      | Median [Q1, Q3]           | 12.8 [4.9, 40.0]          | 19.6 [9.3, 59.7]   | 0.045               |       |
|                                         |      | Min, Max                  | 1.3, 2920.0               | 1.6, 4259.3        |                     |       |
|                                         | 24 週 | n                         | 66                        | 66                 |                     |       |
|                                         |      | Mean ±SD                  | 107.6±344.5               | 155.2±492.3        | 0.52                |       |
|                                         |      | Median [Q1, Q3]           | 14.9 [5.1, 38.3]          | 19.9 [6.2, 54.8]   | 0.26                |       |
|                                         |      | Min, Max                  | 2.0, 2351.7               | 2.0, 3452.6        |                     |       |
|                                         | 変化量  | 12 週                      | n                         | 64                 | 69                  |       |
|                                         |      |                           | Mean ±SD                  | -22.5±123.0        | 9.0±316.4           | 0.46  |
|                                         |      |                           | Median [Q1, Q3]           | -1.2 [-23.8, 3.2]  | -0.5 [-7.0, 16.9]   | 0.13  |
|                                         |      |                           | Min, Max                  | -567.9, 553.1      | -2030.1, 1410.1     |       |

## 5. 副次評価項目

## 5.1. FAS

## 特殊尿検査

|                                                       |                           |                           |                           |                     |                     |       |
|-------------------------------------------------------|---------------------------|---------------------------|---------------------------|---------------------|---------------------|-------|
|                                                       |                           |                           | One-sample t-test         | 0.15                | 0.81                |       |
|                                                       |                           |                           | Wilcoxon signed-rank test | 0.06                | 0.54                |       |
|                                                       |                           | 24 週                      | n                         | 65                  | 66                  |       |
|                                                       |                           |                           | Mean ± SD                 | -21.0 ± 106.4       | -6.3 ± 270.7        | 0.68  |
|                                                       |                           |                           | Median [Q1, Q3]           | 0.1 [-8.3, 3.5]     | -0.8 [-10.9, 13.6]  | 0.71  |
|                                                       |                           |                           | Min, Max                  | -552.6, 177.9       | -1843.0, 652.1      |       |
|                                                       | One-sample t-test         |                           | 0.12                      | 0.85                |                     |       |
|                                                       | Wilcoxon signed-rank test | 0.49                      | 0.91                      |                     |                     |       |
|                                                       | 変化率                       | 12 週                      | n                         | 64                  | 69                  |       |
|                                                       |                           |                           | Mean ± SD                 | 8.4 ± 88.3          | 71.8 ± 183.0        | 0.013 |
|                                                       |                           |                           | Median [Q1, Q3]           | -14.7 [-40.8, 26.5] | -5.0 [-38.6, 89.0]  | 0.09  |
|                                                       |                           |                           | Min, Max                  | -92.6, 326.7        | -79.8, 784.2        |       |
|                                                       |                           |                           | One-sample t-test         | 0.45                | 0.002               |       |
|                                                       |                           |                           | Wilcoxon signed-rank test | 0.34                | 0.16                |       |
|                                                       |                           | 24 週                      | n                         | 65                  | 66                  |       |
|                                                       |                           |                           | Mean ± SD                 | 21.8 ± 115.7        | 107.4 ± 363.4       | 0.07  |
|                                                       |                           |                           | Median [Q1, Q3]           | 2.0 [-47.6, 25.3]   | -9.9 [-46.5, 52.4]  | 0.71  |
|                                                       |                           |                           | Min, Max                  | -93.4, 509.6        | -88.4, 1790.8       |       |
| One-sample t-test                                     |                           |                           | 0.13                      | 0.019               |                     |       |
| Wilcoxon signed-rank test                             |                           |                           | 0.76                      | 0.70                |                     |       |
| 対数変換 尿中<br>アルブミン(クレ<br>アチニン補正<br>値) (ln (mg/g<br>Cr)) | 測定値                       | 0 週                       | n                         | 69                  | 70                  |       |
|                                                       |                           |                           | Mean ± SD                 | 3.13 ± 1.73         | 3.22 ± 1.63         | 0.76  |
|                                                       |                           |                           | Median [Q1, Q3]           | 2.66 [1.79, 4.38]   | 2.98 [1.93, 4.05]   | 0.56  |
|                                                       |                           |                           | Min, Max                  | 0.47, 7.77          | 0.64, 8.18          |       |
|                                                       |                           | 12 週                      | n                         | 65                  | 69                  |       |
|                                                       |                           |                           | Mean ± SD                 | 2.80 ± 1.63         | 3.32 ± 1.68         | 0.07  |
|                                                       |                           |                           | Median [Q1, Q3]           | 2.55 [1.59, 3.69]   | 2.98 [2.23, 4.09]   | 0.045 |
|                                                       |                           |                           | Min, Max                  | 0.26, 7.98          | 0.47, 8.36          |       |
|                                                       |                           | 24 週                      | n                         | 66                  | 66                  |       |
|                                                       |                           |                           | Mean ± SD                 | 2.91 ± 1.61         | 3.20 ± 1.70         | 0.31  |
|                                                       |                           |                           | Median [Q1, Q3]           | 2.70 [1.63, 3.65]   | 2.99 [1.82, 4.00]   | 0.26  |
|                                                       |                           |                           | Min, Max                  | 0.69, 7.76          | 0.69, 8.15          |       |
|                                                       | 変化量                       | 12 週                      | n                         | 64                  | 69                  |       |
|                                                       |                           |                           | Mean ± SD                 | -0.24 ± 0.89        | 0.12 ± 0.89         | 0.019 |
|                                                       |                           |                           | Median [Q1, Q3]           | -0.16 [-0.52, 0.23] | -0.05 [-0.49, 0.64] | 0.09  |
|                                                       |                           |                           | Min, Max                  | -2.61, 1.45         | -1.60, 2.18         |       |
|                                                       |                           |                           | One-sample t-test         | 0.032               | 0.25                |       |
|                                                       |                           |                           | Wilcoxon signed-rank test | 0.06                | 0.57                |       |
| 24 週                                                  |                           | n                         | 65                        | 66                  |                     |       |
|                                                       |                           | Mean ± SD                 | -0.13 ± 0.85              | 0.04 ± 1.03         | 0.29                |       |
|                                                       |                           | Median [Q1, Q3]           | 0.02 [-0.65, 0.23]        | -0.10 [-0.63, 0.42] | 0.71                |       |
|                                                       |                           | Min, Max                  | -2.71, 1.81               | -2.16, 2.94         |                     |       |
|                                                       |                           | One-sample t-test         | 0.21                      | 0.75                |                     |       |
|                                                       |                           | Wilcoxon signed-rank test | 0.26                      | 0.63                |                     |       |
| 変化率                                                   | 12 週                      | n                         | 64                        | 69                  |                     |       |
|                                                       |                           | Mean ± SD                 | -4.0 ± 33.3               | 11.0 ± 47.2         | 0.037               |       |
|                                                       |                           | Median [Q1, Q3]           | -6.7 [-23.8, 9.6]         | -2.0 [-15.3, 23.7]  | 0.09                |       |
|                                                       |                           | Min, Max                  | -68.5, 132.1              | -71.4, 196.2        |                     |       |
|                                                       |                           | One-sample t-test         | 0.34                      | 0.06                |                     |       |

5. 副次評価項目

5.1. FAS

特殊尿検査

|  |      |                           |                   |                    |      |
|--|------|---------------------------|-------------------|--------------------|------|
|  |      | Wilcoxon signed-rank test | 0.10              | 0.48               |      |
|  | 24 週 | n                         | 65                | 66                 |      |
|  |      | Mean $\pm$ SD             | 1.3 $\pm$ 30.0    | 11.1 $\pm$ 59.2    | 0.24 |
|  |      | Median [Q1, Q3]           | 0.7 [-22.1, 15.8] | -2.8 [-16.3, 16.8] | 0.91 |
|  |      | Min, Max                  | -50.3, 98.6       | -63.0, 254.4       |      |
|  |      | One-sample t-test         | 0.73              | 0.13               |      |
|  |      | Wilcoxon signed-rank test | 0.66              | 0.80               |      |

## 5. 副次評価項目

## 5.2. PPS

主要評価項目以外も含めた NT-proBNP

## 5.2. PPS

表 5.2.1. [PPS] 24 週変化率以外も含めた NT-proBNP

| 変数                                | 観察<br>ポイント | 統計量                       | トピロキソスタット群                | アロプリノール群            | 群間比較<br>P 値         |      |
|-----------------------------------|------------|---------------------------|---------------------------|---------------------|---------------------|------|
| 対数変換<br>NT-proBNP<br>(ln (pg/mL)) | 測定値        | 0 週                       | n                         | 64                  | 67                  |      |
|                                   |            |                           | Mean ± SD                 | 6.49 ± 1.00         | 6.34 ± 0.90         | 0.36 |
|                                   |            |                           | Median [Q1, Q3]           | 6.43 [5.74, 7.20]   | 6.30 [5.72, 7.06]   | 0.44 |
|                                   |            |                           | Min, Max                  | 4.68, 10.22         | 4.58, 8.77          |      |
|                                   |            | 12 週                      | n                         | 61                  | 65                  |      |
|                                   |            |                           | Mean ± SD                 | 6.49 ± 0.92         | 6.28 ± 1.04         | 0.24 |
|                                   |            |                           | Median [Q1, Q3]           | 6.43 [5.81, 7.19]   | 6.45 [5.49, 6.97]   | 0.34 |
|                                   |            |                           | Min, Max                  | 4.62, 9.17          | 4.35, 9.53          |      |
|                                   |            | 24 週                      | n                         | 61                  | 63                  |      |
|                                   |            |                           | Mean ± SD                 | 6.48 ± 0.87         | 6.31 ± 1.01         | 0.33 |
|                                   |            |                           | Median [Q1, Q3]           | 6.36 [5.90, 7.14]   | 6.18 [5.52, 7.01]   | 0.24 |
|                                   |            |                           | Min, Max                  | 4.70, 8.39          | 4.62, 9.36          |      |
|                                   | 変化量        | 12 週                      | n                         | 61                  | 65                  |      |
|                                   |            |                           | Mean ± SD                 | 0.03 ± 0.43         | -0.01 ± 0.46        | 0.64 |
|                                   |            |                           | Median [Q1, Q3]           | -0.03 [-0.20, 0.34] | -0.02 [-0.30, 0.30] | 0.49 |
|                                   |            |                           | Min, Max                  | -1.05, 1.31         | -1.10, 1.91         |      |
|                                   |            |                           | One-sample t-test         | 0.59                | 0.89                |      |
|                                   |            |                           | Wilcoxon signed-rank test | 0.63                | 0.71                |      |
|                                   |            | 24 週                      | n                         | 61                  | 63                  |      |
|                                   |            |                           | Mean ± SD                 | 0.06 ± 0.46         | 0.00 ± 0.49         | 0.50 |
|                                   |            |                           | Median [Q1, Q3]           | 0.02 [-0.17, 0.24]  | 0.03 [-0.24, 0.31]  | 0.78 |
|                                   |            |                           | Min, Max                  | -0.87, 1.53         | -1.77, 1.06         |      |
|                                   |            |                           | One-sample t-test         | 0.32                | 0.99                |      |
|                                   |            |                           | Wilcoxon signed-rank test | 0.44                | 0.66                |      |
| 変化率                               | 12 週       | n                         | 61                        | 65                  |                     |      |
|                                   |            | Mean ± SD                 | 0.9 ± 7.0                 | -0.3 ± 7.3          | 0.36                |      |
|                                   |            | Median [Q1, Q3]           | -0.4 [-3.5, 5.2]          | -0.3 [-4.8, 4.8]    | 0.43                |      |
|                                   |            | Min, Max                  | -14.3, 24.2               | -17.3, 25.2         |                     |      |
|                                   |            | One-sample t-test         | 0.34                      | 0.74                |                     |      |
|                                   |            | Wilcoxon signed-rank test | 0.55                      | 0.72                |                     |      |
|                                   | 24 週       | n                         | 61                        | 63                  |                     |      |
|                                   |            | Mean ± SD                 | 1.3 ± 8.1                 | 0.1 ± 7.6           | 0.39                |      |
|                                   |            | Median [Q1, Q3]           | 0.3 [-2.8, 4.1]           | 0.5 [-4.0, 5.0]     | 0.71                |      |
|                                   |            | Min, Max                  | -15.5, 30.5               | -27.6, 16.9         |                     |      |
|                                   |            | One-sample t-test         | 0.21                      | 0.93                |                     |      |
|                                   |            | Wilcoxon signed-rank test | 0.37                      | 0.62                |                     |      |

## 5. 副次評価項目

## 5.2. PPS

## BNP

表 5.2.2. [PPS] BNP

| 変数                       | 観察<br>ポイント | 統計量                       | トピロキソスタット群                | アロプリノール群           | 群間比較<br>P 値         |      |
|--------------------------|------------|---------------------------|---------------------------|--------------------|---------------------|------|
| 対数変換 BNP<br>(ln (pg/mL)) | 測定値        | 0 週                       | n                         | 63                 | 66                  |      |
|                          |            |                           | Mean ±SD                  | 4.92 ±0.74         | 4.81 ±0.65          | 0.37 |
|                          |            |                           | Median [Q1, Q3]           | 4.80 [4.38, 5.52]  | 4.82 [4.36, 5.25]   | 0.58 |
|                          |            |                           | Min, Max                  | 3.33, 6.66         | 3.18, 6.14          |      |
|                          |            | 12 週                      | n                         | 62                 | 66                  |      |
|                          |            |                           | Mean ±SD                  | 4.94 ±0.68         | 4.78 ±0.82          | 0.23 |
|                          |            |                           | Median [Q1, Q3]           | 4.85 [4.53, 5.33]  | 4.89 [4.19, 5.32]   | 0.38 |
|                          |            |                           | Min, Max                  | 3.03, 6.44         | 2.79, 7.25          |      |
|                          |            | 24 週                      | n                         | 61                 | 63                  |      |
|                          |            |                           | Mean ±SD                  | 4.93 ±0.72         | 4.79 ±0.75          | 0.32 |
|                          |            |                           | Median [Q1, Q3]           | 4.99 [4.55, 5.35]  | 4.87 [4.24, 5.37]   | 0.35 |
|                          |            |                           | Min, Max                  | 2.65, 6.70         | 3.12, 6.09          |      |
|                          | 変化量        | 12 週                      | n                         | 61                 | 65                  |      |
|                          |            |                           | Mean ±SD                  | 0.02 ±0.45         | -0.02 ±0.48         | 0.61 |
|                          |            |                           | Median [Q1, Q3]           | 0.07 [-0.22, 0.26] | -0.05 [-0.34, 0.30] | 0.39 |
|                          |            |                           | Min, Max                  | -1.29, 1.13        | -1.04, 1.59         |      |
|                          |            |                           | One-sample t-test         | 0.75               | 0.69                |      |
|                          |            |                           | Wilcoxon signed-rank test | 0.50               | 0.57                |      |
|                          |            | 24 週                      | n                         | 60                 | 62                  |      |
|                          |            |                           | Mean ±SD                  | 0.04 ±0.53         | -0.02 ±0.49         | 0.48 |
|                          |            |                           | Median [Q1, Q3]           | 0.06 [-0.23, 0.29] | 0.04 [-0.19, 0.26]  | 0.85 |
|                          |            |                           | Min, Max                  | -1.68, 1.57        | -1.87, 0.77         |      |
|                          |            |                           | One-sample t-test         | 0.52               | 0.73                |      |
|                          |            |                           | Wilcoxon signed-rank test | 0.44               | 0.58                |      |
| 変化率                      | 12 週       | n                         | 61                        | 65                 |                     |      |
|                          |            | Mean ±SD                  | 1.0 ±9.8                  | -0.6 ±10.1         | 0.36                |      |
|                          |            | Median [Q1, Q3]           | 1.3 [-4.1, 5.8]           | -1.0 [-6.4, 5.8]   | 0.33                |      |
|                          |            | Min, Max                  | -29.9, 32.2               | -22.5, 28.1        |                     |      |
|                          |            | One-sample t-test         | 0.42                      | 0.63               |                     |      |
|                          |            | Wilcoxon signed-rank test | 0.39                      | 0.58               |                     |      |
|                          | 24 週       | n                         | 60                        | 62                 |                     |      |
|                          |            | Mean ±SD                  | 1.5 ±12.3                 | -0.2 ±10.2         | 0.38                |      |
|                          |            | Median [Q1, Q3]           | 1.3 [-4.8, 6.4]           | 0.7 [-4.8, 5.1]    | 0.76                |      |
|                          |            | Min, Max                  | -38.8, 40.3               | -36.1, 16.6        |                     |      |
|                          |            | One-sample t-test         | 0.34                      | 0.85               |                     |      |
|                          |            | Wilcoxon signed-rank test | 0.39                      | 0.64               |                     |      |

5. 副次評価項目

5.2. PPS

NT-proBNP の変化率と BNP 変化率の相関

表 5.2.3. [PPS] NT-proBNP の変化率と BNP 変化率の相関

| 変数 1                                   | 変数 2                             | n   | Pearson           |        | Spearman          |        |
|----------------------------------------|----------------------------------|-----|-------------------|--------|-------------------|--------|
|                                        |                                  |     | 相関係数<br>(95%CI)   | P 値    | 相関係数<br>(95%CI)   | P 値    |
| 対数変換 NT-proBNP<br>(ln (pg/mL)) 12 週変化率 | 対数変換 BNP<br>(ln (pg/mL)) 12 週変化率 | 123 | 0.74 (0.65, 0.81) | <0.001 | 0.68 (0.57, 0.77) | <0.001 |
| 対数変換 NT-proBNP<br>(ln (pg/mL)) 24 週変化率 | 対数変換 BNP<br>(ln (pg/mL)) 24 週変化率 | 122 | 0.83 (0.76, 0.88) | <0.001 | 0.69 (0.59, 0.77) | <0.001 |



## 5. 副次評価項目

## 5.2. PPS

## FMD

表 5.2.4. [PPS] FMD

| 変数      |     | 観察<br>ポイント | 統計量                       | トピロキソスタット群         | アロプリノール群            | 群間比較<br>P 値 |
|---------|-----|------------|---------------------------|--------------------|---------------------|-------------|
| FMD (%) | 測定値 | 0 週        | n                         | 45                 | 47                  |             |
|         |     |            | Mean ± SD                 | 4.78 ± 2.39        | 4.63 ± 2.10         | 0.76        |
|         |     |            | Median [Q1, Q3]           | 4.60 [3.00, 5.80]  | 4.70 [3.40, 5.70]   | 0.98        |
|         |     |            | Min, Max                  | 1.10, 11.50        | 1.10, 10.80         |             |
|         |     | 24 週       | n                         | 45                 | 45                  |             |
|         |     |            | Mean ± SD                 | 4.90 ± 2.48        | 4.24 ± 1.59         | 0.14        |
|         |     |            | Median [Q1, Q3]           | 4.00 [3.40, 6.10]  | 4.10 [3.40, 5.20]   | 0.38        |
|         |     |            | Min, Max                  | 1.30, 12.60        | 1.20, 9.20          |             |
|         | 変化量 | 24 週       | n                         | 44                 | 44                  |             |
|         |     |            | Mean ± SD                 | 0.11 ± 1.74        | -0.40 ± 1.34        | 0.13        |
|         |     |            | Median [Q1, Q3]           | 0.25 [-0.75, 1.10] | -0.25 [-0.90, 0.20] | 0.06        |
|         |     |            | Min, Max                  | -6.60, 4.40        | -5.60, 2.40         |             |
|         |     |            | One-sample t-test         | 0.69               | 0.05                |             |
|         |     |            | Wilcoxon signed-rank test | 0.43               | 0.035               |             |

## 5. 副次評価項目

## 5.2. PPS

## EndoPAT

表 5.2.5. [PPS] EndoPAT

| 変数                  |                           | 観察<br>ポイント | 統計量               | トピロキソスタット群         | アロプリノール群            | 群間比較<br>P 値 |
|---------------------|---------------------------|------------|-------------------|--------------------|---------------------|-------------|
| EndoPAT (RHI<br>指数) | 測定値                       | 0 週        | n                 | 62                 | 65                  |             |
|                     |                           |            | Mean ± SD         | 1.74 ± 0.55        | 1.81 ± 0.66         | 0.51        |
|                     |                           |            | Median [Q1, Q3]   | 1.64 [1.37, 2.00]  | 1.67 [1.45, 1.96]   | 0.55        |
|                     |                           |            | Min, Max          | 0.92, 3.66         | 0.75, 4.56          |             |
|                     |                           | 24 週       | n                 | 61                 | 60                  |             |
|                     |                           |            | Mean ± SD         | 1.73 ± 0.49        | 1.79 ± 0.58         | 0.53        |
|                     |                           |            | Median [Q1, Q3]   | 1.62 [1.39, 1.90]  | 1.68 [1.40, 2.04]   | 0.64        |
|                     |                           |            | Min, Max          | 0.78, 2.87         | 0.86, 3.52          |             |
|                     | 変化量                       | 24 週       | n                 | 60                 | 59                  |             |
|                     |                           |            | Mean ± SD         | -0.03 ± 0.47       | -0.02 ± 0.67        | 0.94        |
|                     |                           |            | Median [Q1, Q3]   | 0.01 [-0.25, 0.21] | -0.07 [-0.32, 0.31] | 0.90        |
|                     |                           |            | Min, Max          | -1.52, 0.98        | -2.48, 1.66         |             |
|                     |                           |            | One-sample t-test | 0.63               | 0.81                |             |
|                     | Wilcoxon signed-rank test | 0.71       | 0.78              |                    |                     |             |

## 5. 副次評価項目

## 5.2. PPS

## FMD の変化量と EndoPAT の変化量の相関

表 5.2.6. [PPS] FMD の変化量と EndoPAT の変化量の相関

| 変数 1            | 変数 2                        | n  | Pearson            |      | Spearman           |      |
|-----------------|-----------------------------|----|--------------------|------|--------------------|------|
|                 |                             |    | 相関係数<br>(95%CI)    | P 値  | 相関係数<br>(95%CI)    | P 値  |
| FMD (%) 24 週変化量 | EndoPAT (RHI 指数)<br>24 週変化量 | 88 | 0.03 (-0.18, 0.24) | 0.80 | 0.06 (-0.15, 0.26) | 0.59 |

## 5. 副次評価項目

## 5.2. PPS

## 血中尿酸値

表 5.2.7. [PPS] 血中尿酸値

| 変数                        |        | 観察<br>ポイント | 統計量                       | トピロキソスタット群        | アロプリノール群          | 群間比較<br>P 値 |
|---------------------------|--------|------------|---------------------------|-------------------|-------------------|-------------|
| 血中尿酸値<br>(mg/dL)          | 測定値    | 0 週        | n                         | 63                | 66                |             |
|                           |        |            | Mean ± SD                 | 8.3 ± 1.4         | 8.1 ± 1.4         | 0.62        |
|                           |        |            | Median [Q1, Q3]           | 8.1 [7.2, 9.1]    | 8.0 [7.3, 8.7]    | 0.66        |
|                           |        |            | Min, Max                  | 5.7, 11.6         | 5.4, 12.4         |             |
|                           |        | 12 週       | n                         | 63                | 66                |             |
|                           |        |            | Mean ± SD                 | 5.4 ± 1.1         | 5.8 ± 1.1         | 0.032       |
|                           |        |            | Median [Q1, Q3]           | 5.5 [4.9, 6.1]    | 5.9 [5.1, 6.4]    | 0.035       |
|                           |        |            | Min, Max                  | 3.2, 8.7          | 3.6, 9.0          |             |
|                           |        | 24 週       | n                         | 61                | 63                |             |
|                           |        |            | Mean ± SD                 | 5.5 ± 1.2         | 5.9 ± 1.1         | 0.05        |
|                           |        |            | Median [Q1, Q3]           | 5.4 [4.6, 6.5]    | 6.0 [5.2, 6.4]    | 0.11        |
|                           |        |            | Min, Max                  | 3.1, 7.8          | 3.6, 9.7          |             |
|                           | 変化量    | 12 週       | n                         | 62                | 65                |             |
|                           |        |            | Mean ± SD                 | -2.8 ± 1.2        | -2.2 ± 1.2        | 0.007       |
|                           |        |            | Median [Q1, Q3]           | -2.7 [-3.8, -2.0] | -2.0 [-2.7, -1.5] | 0.008       |
|                           |        |            | Min, Max                  | -5.5, -0.9        | -6.2, 0.7         |             |
|                           |        |            | One-sample t-test         | <0.001            | <0.001            |             |
|                           |        |            | Wilcoxon signed-rank test | <0.001            | <0.001            |             |
|                           |        | 24 週       | n                         | 60                | 62                |             |
|                           |        |            | Mean ± SD                 | -2.7 ± 1.5        | -2.2 ± 1.2        | 0.042       |
| Median [Q1, Q3]           |        |            | -2.6 [-3.7, -1.8]         | -2.0 [-3.1, -1.4] | 0.020             |             |
| Min, Max                  |        |            | -6.6, 0.6                 | -5.7, 0.5         |                   |             |
| One-sample t-test         | <0.001 | <0.001     |                           |                   |                   |             |
| Wilcoxon signed-rank test | <0.001 | <0.001     |                           |                   |                   |             |

5. 副次評価項目  
5.2. PPS  
バイタルサイン、一般血液・尿検査

表 5.2.8. [PPS] バイタルサイン、一般血液・尿検査

| 変数                        | 観察ポイント          | 統計量             | トピロキソスタット群                | アロプリノール群          | 群間比較 P 値          |      |
|---------------------------|-----------------|-----------------|---------------------------|-------------------|-------------------|------|
| 体重 (kg)                   | 測定値             | 0 週             | n                         | 64                | 67                |      |
|                           |                 |                 | Mean ±SD                  | 67.1 ± 13.7       | 66.4 ± 12.9       | 0.78 |
|                           |                 |                 | Median [Q1, Q3]           | 64.0 [56.3, 75.5] | 66.0 [59.4, 75.0] | 0.94 |
|                           |                 |                 | Min, Max                  | 44.5, 107.6       | 41.0, 104.0       |      |
|                           |                 | 12 週            | n                         | 58                | 61                |      |
|                           |                 |                 | Mean ±SD                  | 66.6 ± 13.6       | 66.5 ± 13.2       | 0.98 |
|                           |                 |                 | Median [Q1, Q3]           | 64.3 [57.8, 74.1] | 66.0 [59.8, 74.0] | 0.79 |
|                           |                 |                 | Min, Max                  | 42.0, 111.0       | 44.0, 108.0       |      |
|                           |                 | 24 週            | n                         | 60                | 62                |      |
|                           |                 |                 | Mean ±SD                  | 67.3 ± 14.2       | 66.4 ± 14.0       | 0.72 |
|                           |                 |                 | Median [Q1, Q3]           | 65.4 [57.9, 76.0] | 64.5 [59.4, 75.0] | 0.86 |
|                           |                 |                 | Min, Max                  | 42.0, 113.9       | 40.0, 110.0       |      |
|                           | 変化量             | 12 週            | n                         | 58                | 61                |      |
|                           |                 |                 | Mean ±SD                  | 0.0 ± 2.3         | -0.4 ± 4.5        | 0.58 |
|                           |                 |                 | Median [Q1, Q3]           | 0.0 [-1.0, 1.0]   | 0.0 [-0.1, 1.0]   | 0.47 |
|                           |                 |                 | Min, Max                  | -8.6, 8.0         | -30.0, 6.9        |      |
|                           |                 |                 | One-sample t-test         | 0.97              | 0.54              |      |
|                           |                 |                 | Wilcoxon signed-rank test | 0.89              | 0.37              |      |
|                           |                 | 24 週            | n                         | 60                | 62                |      |
|                           |                 |                 | Mean ±SD                  | 0.4 ± 2.4         | -0.4 ± 5.0        | 0.27 |
| Median [Q1, Q3]           |                 |                 | 0.0 [-1.3, 1.6]           | 0.0 [-1.0, 1.3]   | 0.62              |      |
| Min, Max                  |                 |                 | -4.0, 8.0                 | -31.0, 11.6       |                   |      |
| One-sample t-test         |                 |                 | 0.23                      | 0.51              |                   |      |
| Wilcoxon signed-rank test |                 |                 | 0.42                      | 0.92              |                   |      |
| BMI (kg/m <sup>2</sup> )  | 測定値             | 0 週             | n                         | 64                | 67                |      |
|                           |                 |                 | Mean ±SD                  | 25.3 ± 4.3        | 25.0 ± 3.6        | 0.72 |
|                           |                 |                 | Median [Q1, Q3]           | 25.0 [21.9, 28.0] | 24.7 [22.1, 27.2] | 0.86 |
|                           |                 |                 | Min, Max                  | 17.1, 39.0        | 19.4, 38.2        |      |
|                           |                 | 12 週            | n                         | 58                | 61                |      |
|                           |                 |                 | Mean ±SD                  | 25.1 ± 4.5        | 24.9 ± 3.9        | 0.80 |
|                           |                 |                 | Median [Q1, Q3]           | 24.3 [21.6, 27.9] | 24.7 [22.2, 26.7] | 0.92 |
|                           |                 |                 | Min, Max                  | 16.0, 40.3        | 19.0, 39.7        |      |
|                           |                 | 24 週            | n                         | 60                | 62                |      |
|                           |                 |                 | Mean ±SD                  | 25.4 ± 4.6        | 25.0 ± 4.1        | 0.63 |
|                           |                 |                 | Median [Q1, Q3]           | 25.2 [22.2, 28.2] | 24.8 [22.4, 26.7] | 0.67 |
|                           |                 |                 | Min, Max                  | 16.0, 41.3        | 18.3, 40.4        |      |
|                           | 変化量             | 12 週            | n                         | 58                | 61                |      |
|                           |                 |                 | Mean ±SD                  | 0.0 ± 0.8         | -0.1 ± 1.7        | 0.54 |
|                           |                 |                 | Median [Q1, Q3]           | 0.0 [-0.4, 0.3]   | 0.0 [0.0, 0.4]    | 0.50 |
|                           |                 |                 | Min, Max                  | -2.6, 2.9         | -11.2, 2.4        |      |
|                           |                 |                 | One-sample t-test         | 0.85              | 0.55              |      |
|                           |                 |                 | Wilcoxon signed-rank test | 0.95              | 0.44              |      |
|                           |                 | 24 週            | n                         | 60                | 62                |      |
|                           |                 |                 | Mean ±SD                  | 0.2 ± 0.9         | -0.2 ± 1.9        | 0.24 |
|                           | Median [Q1, Q3] | 0.0 [-0.5, 0.7] | 0.0 [-0.4, 0.6]           | 0.56              |                   |      |
|                           | Min, Max        | -1.4, 2.9       | -11.5, 4.1                |                   |                   |      |

5. 副次評価項目  
5.2. PPS  
バイタルサイン、一般血液・尿検査

|                 |                   |                           |                           |                      |                      |      |
|-----------------|-------------------|---------------------------|---------------------------|----------------------|----------------------|------|
|                 |                   |                           | One-sample t-test         | 0.18                 | 0.50                 |      |
|                 |                   |                           | Wilcoxon signed-rank test | 0.33                 | 0.92                 |      |
| 収縮期血圧<br>(mmHg) | 測定値               | 0 週                       | n                         | 64                   | 67                   |      |
|                 |                   |                           | Mean ±SD                  | 124.1 ± 19.4         | 125.2 ± 17.9         | 0.74 |
|                 |                   |                           | Median [Q1, Q3]           | 120.5 [110.5, 136.5] | 124.0 [113.0, 137.0] | 0.70 |
|                 |                   |                           | Min, Max                  | 91.0, 171.0          | 90.0, 163.0          |      |
|                 |                   | 12 週                      | n                         | 63                   | 66                   |      |
|                 |                   |                           | Mean ±SD                  | 122.8 ± 17.8         | 124.6 ± 17.2         | 0.55 |
|                 |                   |                           | Median [Q1, Q3]           | 120.0 [109.0, 135.0] | 121.5 [114.0, 140.0] | 0.45 |
|                 |                   |                           | Min, Max                  | 96.0, 168.0          | 93.0, 158.0          |      |
|                 |                   | 24 週                      | n                         | 61                   | 63                   |      |
|                 |                   |                           | Mean ±SD                  | 126.3 ± 18.5         | 123.9 ± 18.3         | 0.47 |
|                 |                   |                           | Median [Q1, Q3]           | 124.0 [115.0, 136.0] | 124.0 [114.0, 135.0] | 0.62 |
|                 |                   |                           | Min, Max                  | 95.0, 179.0          | 84.0, 164.0          |      |
|                 | 変化量               | 12 週                      | n                         | 63                   | 66                   |      |
|                 |                   |                           | Mean ±SD                  | -1.2 ± 17.2          | -0.1 ± 16.0          | 0.70 |
|                 |                   |                           | Median [Q1, Q3]           | 1.0 [-14.0, 10.0]    | 2.0 [-9.0, 8.0]      | 0.67 |
|                 |                   |                           | Min, Max                  | -53.0, 37.0          | -53.0, 32.0          |      |
|                 |                   |                           | One-sample t-test         | 0.57                 | 0.96                 |      |
|                 |                   |                           | Wilcoxon signed-rank test | 0.76                 | 0.82                 |      |
| 24 週            |                   | n                         | 61                        | 63                   |                      |      |
|                 |                   | Mean ±SD                  | 2.2 ± 16.4                | 0.1 ± 16.7           | 0.47                 |      |
|                 |                   | Median [Q1, Q3]           | 2.0 [-8.0, 11.0]          | 1.0 [-10.0, 9.0]     | 0.47                 |      |
|                 |                   | Min, Max                  | -47.0, 53.0               | -42.0, 40.0          |                      |      |
|                 |                   | One-sample t-test         | 0.30                      | 0.98                 |                      |      |
|                 |                   | Wilcoxon signed-rank test | 0.23                      | 0.91                 |                      |      |
| 拡張期血圧<br>(mmHg) | 測定値               | 0 週                       | n                         | 64                   | 67                   |      |
|                 |                   |                           | Mean ±SD                  | 72.5 ± 14.7          | 73.2 ± 12.2          | 0.76 |
|                 |                   |                           | Median [Q1, Q3]           | 70.5 [60.0, 82.0]    | 73.0 [66.0, 79.0]    | 0.47 |
|                 |                   |                           | Min, Max                  | 47.0, 110.0          | 43.0, 118.0          |      |
|                 |                   | 12 週                      | n                         | 63                   | 66                   |      |
|                 |                   |                           | Mean ±SD                  | 71.7 ± 15.2          | 72.8 ± 14.0          | 0.67 |
|                 |                   |                           | Median [Q1, Q3]           | 70.0 [60.0, 83.0]    | 73.5 [63.0, 84.0]    | 0.53 |
|                 |                   |                           | Min, Max                  | 46.0, 106.0          | 40.0, 108.0          |      |
|                 |                   | 24 週                      | n                         | 61                   | 63                   |      |
|                 |                   |                           | Mean ±SD                  | 71.9 ± 14.4          | 73.6 ± 14.1          | 0.51 |
|                 |                   |                           | Median [Q1, Q3]           | 71.0 [60.0, 83.0]    | 70.0 [64.0, 82.0]    | 0.55 |
|                 |                   |                           | Min, Max                  | 40.0, 110.0          | 48.0, 118.0          |      |
|                 | 変化量               | 12 週                      | n                         | 63                   | 66                   |      |
|                 |                   |                           | Mean ±SD                  | -1.1 ± 15.2          | -0.2 ± 12.4          | 0.71 |
|                 |                   |                           | Median [Q1, Q3]           | -2.0 [-11.0, 5.0]    | 0.0 [-8.0, 8.0]      | 0.38 |
|                 |                   |                           | Min, Max                  | -45.0, 45.0          | -34.0, 35.0          |      |
|                 |                   |                           | One-sample t-test         | 0.57                 | 0.91                 |      |
|                 |                   |                           | Wilcoxon signed-rank test | 0.28                 | 0.94                 |      |
| 24 週            | n                 | 61                        | 63                        |                      |                      |      |
|                 | Mean ±SD          | -0.6 ± 14.0               | 0.7 ± 12.3                | 0.58                 |                      |      |
|                 | Median [Q1, Q3]   | 0.0 [-8.0, 6.0]           | 0.0 [-8.0, 8.0]           | 0.58                 |                      |      |
|                 | Min, Max          | -34.0, 52.0               | -27.0, 32.0               |                      |                      |      |
|                 | One-sample t-test | 0.74                      | 0.65                      |                      |                      |      |

5. 副次評価項目  
5.2. PPS  
バイタルサイン、一般血液・尿検査

|                                 |                 |                           |                           |                      |                      |      |
|---------------------------------|-----------------|---------------------------|---------------------------|----------------------|----------------------|------|
|                                 |                 |                           | Wilcoxon signed-rank test | 0.51                 | 0.82                 |      |
| 脈拍 (bpm)                        | 測定値             | 0 週                       | n                         | 63                   | 67                   |      |
|                                 |                 |                           | Mean ± SD                 | 71.8 ± 13.6          | 71.9 ± 13.4          | 0.99 |
|                                 |                 |                           | Median [Q1, Q3]           | 70.0 [63.0, 80.0]    | 72.0 [62.0, 83.0]    | 0.81 |
|                                 |                 |                           | Min, Max                  | 44.0, 111.0          | 41.0, 98.0           |      |
|                                 |                 | 12 週                      | n                         | 59                   | 65                   |      |
|                                 |                 |                           | Mean ± SD                 | 75.6 ± 15.6          | 73.3 ± 12.8          | 0.37 |
|                                 |                 |                           | Median [Q1, Q3]           | 75.0 [64.0, 86.0]    | 74.0 [63.0, 84.0]    | 0.52 |
|                                 |                 |                           | Min, Max                  | 47.0, 134.0          | 47.0, 106.0          |      |
|                                 |                 | 24 週                      | n                         | 59                   | 63                   |      |
|                                 |                 |                           | Mean ± SD                 | 72.6 ± 14.2          | 75.5 ± 16.4          | 0.30 |
|                                 |                 |                           | Median [Q1, Q3]           | 73.0 [63.0, 82.0]    | 73.0 [62.0, 86.0]    | 0.52 |
|                                 |                 |                           | Min, Max                  | 43.0, 120.0          | 51.0, 130.0          |      |
|                                 | 変化量             | 12 週                      | n                         | 59                   | 65                   |      |
|                                 |                 |                           | Mean ± SD                 | 2.7 ± 10.2           | 1.1 ± 13.1           | 0.46 |
|                                 |                 |                           | Median [Q1, Q3]           | 0.0 [-4.0, 7.0]      | 0.0 [-6.0, 9.0]      | 0.79 |
|                                 |                 |                           | Min, Max                  | -14.0, 33.0          | -40.0, 29.0          |      |
|                                 |                 |                           | One-sample t-test         | 0.047                | 0.50                 |      |
|                                 |                 |                           | Wilcoxon signed-rank test | 0.16                 | 0.37                 |      |
| 24 週                            |                 | n                         | 59                        | 63                   |                      |      |
|                                 |                 | Mean ± SD                 | 1.1 ± 14.6                | 3.3 ± 16.4           | 0.44                 |      |
|                                 |                 | Median [Q1, Q3]           | 0.0 [-7.0, 10.0]          | 1.0 [-7.0, 9.0]      | 0.86                 |      |
|                                 |                 | Min, Max                  | -47.0, 46.0               | -25.0, 56.0          |                      |      |
|                                 |                 | One-sample t-test         | 0.55                      | 0.11                 |                      |      |
|                                 |                 | Wilcoxon signed-rank test | 0.47                      | 0.34                 |                      |      |
| NYHA 分類                         | 測定値             | 0 週                       | n                         | 64                   | 67                   |      |
|                                 |                 |                           | Median [Q1, Q3]           | 1.0 [1.0, 2.0]       | 1.0 [1.0, 2.0]       | 0.72 |
|                                 |                 |                           | Min, Max                  | 1.0, 2.0             | 1.0, 2.0             |      |
|                                 |                 | 12 週                      | n                         | 62                   | 66                   |      |
|                                 |                 |                           | Median [Q1, Q3]           | 1.0 [1.0, 2.0]       | 1.0 [1.0, 2.0]       | 0.81 |
|                                 |                 |                           | Min, Max                  | 1.0, 2.0             | 1.0, 2.0             |      |
|                                 |                 | 24 週                      | n                         | 61                   | 62                   |      |
|                                 |                 |                           | Median [Q1, Q3]           | 1.0 [1.0, 2.0]       | 1.0 [1.0, 2.0]       | 0.61 |
|                                 |                 |                           | Min, Max                  | 1.0, 3.0             | 1.0, 4.0             |      |
|                                 | 変化量             | 12 週                      | n                         | 62                   | 66                   |      |
|                                 |                 |                           | Median [Q1, Q3]           | 0.0 [0.0, 0.0]       | 0.0 [0.0, 0.0]       | 0.78 |
|                                 |                 |                           | Min, Max                  | -1.0, 1.0            | -1.0, 1.0            |      |
| 24 週                            | n               | 61                        | 62                        |                      |                      |      |
|                                 | Median [Q1, Q3] | 0.0 [0.0, 0.0]            | 0.0 [0.0, 0.0]            | 0.16                 |                      |      |
|                                 | Min, Max        | -1.0, 1.0                 | -1.0, 2.0                 |                      |                      |      |
| 赤血球数 (×<br>10 <sup>4</sup> /μL) | 測定値             | 0 週                       | n                         | 63                   | 66                   |      |
|                                 |                 |                           | Mean ± SD                 | 443.8 ± 47.0         | 433.4 ± 64.4         | 0.30 |
|                                 |                 |                           | Median [Q1, Q3]           | 446.0 [411.0, 472.0] | 431.5 [384.0, 478.0] | 0.22 |
|                                 |                 |                           | Min, Max                  | 355.0, 568.0         | 274.0, 577.0         |      |
|                                 |                 | 12 週                      | n                         | 63                   | 66                   |      |
|                                 |                 |                           | Mean ± SD                 | 443.7 ± 52.1         | 429.0 ± 69.1         | 0.18 |
|                                 |                 |                           | Median [Q1, Q3]           | 433.0 [406.0, 488.0] | 422.5 [378.0, 485.0] | 0.22 |
|                                 |                 |                           | Min, Max                  |                      |                      |      |

## 5. 副次評価項目

## 5.2. PPS

## バイタルサイン、一般血液・尿検査

|                  |                           |                           |                        |                         |                         |      |
|------------------|---------------------------|---------------------------|------------------------|-------------------------|-------------------------|------|
|                  |                           |                           | Min, Max               | 303.0, 565.0            | 285.0, 570.0            |      |
|                  | 24 週                      | n                         |                        | 62                      | 63                      |      |
|                  |                           | Mean ± SD                 |                        | 440.8 ± 57.2            | 421.3 ± 66.5            | 0.08 |
|                  |                           | Median [Q1, Q3]           |                        | 447.5 [408.0, 480.0]    | 410.0 [381.0, 458.0]    | 0.05 |
|                  |                           | Min, Max                  |                        | 313.0, 598.0            | 284.0, 580.0            |      |
|                  | 変化量                       | 12 週                      | n                      | 62                      | 65                      |      |
|                  |                           | Mean ± SD                 |                        | -0.1 ± 25.3             | -4.3 ± 33.9             | 0.42 |
|                  |                           | Median [Q1, Q3]           |                        | 1.0 [-20.0, 15.0]       | 0.0 [-23.0, 18.0]       | 0.65 |
|                  |                           | Min, Max                  |                        | -55.0, 73.0             | -135.0, 70.0            |      |
|                  |                           | One-sample t-test         |                        | 0.98                    | 0.31                    |      |
|                  |                           | Wilcoxon signed-rank test |                        | 0.97                    | 0.54                    |      |
|                  |                           | 24 週                      | n                      | 61                      | 62                      |      |
|                  |                           | Mean ± SD                 |                        | -3.7 ± 29.6             | -8.7 ± 25.7             | 0.32 |
|                  |                           | Median [Q1, Q3]           |                        | -2.0 [-16.0, 16.0]      | -11.0 [-26.0, 10.0]     | 0.16 |
|                  |                           | Min, Max                  |                        | -125.0, 62.0            | -64.0, 53.0             |      |
|                  |                           | One-sample t-test         |                        | 0.33                    | 0.010                   |      |
|                  |                           | Wilcoxon signed-rank test |                        | 0.57                    | 0.012                   |      |
| 白血球数<br>(/μL)    | 測定値                       | 0 週                       | n                      | 63                      | 66                      |      |
|                  |                           |                           | Mean ± SD              | 5730.2 ± 1327.5         | 6116.1 ± 1846.8         | 0.18 |
|                  |                           |                           | Median [Q1, Q3]        | 5500.0 [4900.0, 6700.0] | 5680.0 [5000.0, 7000.0] | 0.32 |
|                  |                           |                           | Min, Max               | 2900.0, 9400.0          | 2500.0, 11700.0         |      |
|                  |                           | 12 週                      | n                      | 63                      | 66                      |      |
|                  |                           |                           | Mean ± SD              | 5803.2 ± 1495.2         | 5974.2 ± 1723.0         | 0.55 |
|                  |                           |                           | Median [Q1, Q3]        | 5500.0 [4700.0, 6900.0] | 5850.0 [4700.0, 7000.0] | 0.64 |
|                  |                           |                           | Min, Max               | 3200.0, 9800.0          | 3100.0, 11400.0         |      |
|                  |                           | 24 週                      | n                      | 62                      | 63                      |      |
|                  |                           |                           | Mean ± SD              | 5662.9 ± 1439.1         | 5950.8 ± 1648.4         | 0.30 |
|                  |                           |                           | Median [Q1, Q3]        | 5550.0 [4600.0, 6400.0] | 5800.0 [4900.0, 6400.0] | 0.38 |
|                  |                           |                           | Min, Max               | 3000.0, 10100.0         | 3100.0, 11100.0         |      |
|                  | 変化量                       | 12 週                      | n                      | 62                      | 65                      |      |
|                  |                           |                           | Mean ± SD              | 108.1 ± 1125.3          | -82.5 ± 1274.3          | 0.37 |
|                  |                           |                           | Median [Q1, Q3]        | 200.0 [-700.0, 1000.0]  | 0.0 [-700.0, 400.0]     | 0.43 |
|                  |                           |                           | Min, Max               | -2100.0, 2600.0         | -5900.0, 2600.0         |      |
|                  |                           |                           | One-sample t-test      | 0.45                    | 0.60                    |      |
|                  |                           | Wilcoxon signed-rank test | 0.50                   | 0.61                    |                         |      |
|                  |                           | 24 週                      | n                      | 61                      | 62                      |      |
|                  |                           |                           | Mean ± SD              | 24.6 ± 978.9            | -15.5 ± 1107.0          | 0.83 |
| Median [Q1, Q3]  | 100.0 [-400.0, 400.0]     |                           | -100.0 [-600.0, 500.0] | 0.38                    |                         |      |
|                  | Min, Max                  | -3400.0, 2900.0           | -2700.0, 3400.0        |                         |                         |      |
|                  | One-sample t-test         | 0.85                      | 0.91                   |                         |                         |      |
|                  | Wilcoxon signed-rank test | 0.54                      | 0.53                   |                         |                         |      |
| ヘモグロビン<br>(g/dL) | 測定値                       | 0 週                       | n                      | 63                      | 66                      |      |
|                  |                           |                           | Mean ± SD              | 13.6 ± 1.5              | 13.3 ± 1.9              | 0.40 |
|                  |                           |                           | Median [Q1, Q3]        | 13.8 [12.4, 14.7]       | 13.1 [12.1, 14.7]       | 0.32 |



## 5. 副次評価項目

## 5.2. PPS

## バイタルサイン、一般血液・尿検査

|                              |                           |                  |                           |                   |                   |      |
|------------------------------|---------------------------|------------------|---------------------------|-------------------|-------------------|------|
|                              |                           | 12 週             | Min, Max                  | 9.0, 16.6         | 8.8, 17.1         |      |
|                              |                           |                  | n                         | 63                | 66                |      |
|                              |                           |                  | Mean ±SD                  | 13.5 ±1.6         | 13.2 ±2.1         | 0.38 |
|                              |                           |                  | Median [Q1, Q3]           | 13.4 [12.4, 14.9] | 13.0 [11.4, 15.0] | 0.40 |
|                              |                           | Min, Max         | 9.2, 16.5                 | 8.6, 16.9         |                   |      |
|                              |                           | 24 週             | n                         | 62                | 63                |      |
|                              |                           |                  | Mean ±SD                  | 13.4 ±1.9         | 13.0 ±2.0         | 0.34 |
|                              |                           |                  | Median [Q1, Q3]           | 13.7 [12.1, 14.9] | 12.8 [11.7, 14.5] | 0.26 |
|                              | Min, Max                  |                  | 8.5, 17.0                 | 8.5, 17.5         |                   |      |
|                              | 変化量                       | 12 週             | n                         | 62                | 65                |      |
|                              |                           |                  | Mean ±SD                  | -0.1 ±0.8         | -0.1 ±0.9         | 0.91 |
|                              |                           |                  | Median [Q1, Q3]           | -0.1 [-0.5, 0.3]  | 0.0 [-0.5, 0.5]   | 0.62 |
|                              |                           |                  | Min, Max                  | -1.9, 2.2         | -4.0, 1.7         |      |
|                              |                           |                  | One-sample t-test         | 0.32              | 0.46              |      |
|                              |                           |                  | Wilcoxon signed-rank test | 0.29              | 0.75              |      |
|                              |                           | 24 週             | n                         | 61                | 62                |      |
| Mean ±SD                     |                           |                  | -0.3 ±0.9                 | -0.2 ±0.8         | 0.62              |      |
| Median [Q1, Q3]              | -0.1 [-0.7, 0.4]          |                  | -0.3 [-0.8, 0.3]          | 0.96              |                   |      |
| Min, Max                     | -3.6, 1.5                 |                  | -1.7, 1.9                 |                   |                   |      |
| One-sample t-test            | 0.036                     |                  | 0.07                      |                   |                   |      |
| Wilcoxon signed-rank test    | 0.07                      |                  | 0.06                      |                   |                   |      |
| ヘマトクリット (%)                  | 測定値                       | 0 週              | n                         | 63                | 66                |      |
|                              |                           |                  | Mean ±SD                  | 41.1 ±4.3         | 40.2 ±5.2         | 0.28 |
|                              |                           |                  | Median [Q1, Q3]           | 41.4 [38.3, 43.8] | 39.9 [36.5, 43.2] | 0.18 |
|                              |                           |                  | Min, Max                  | 28.3, 51.6        | 27.4, 51.1        |      |
|                              |                           | 12 週             | n                         | 63                | 66                |      |
|                              |                           |                  | Mean ±SD                  | 41.1 ±4.7         | 40.2 ±5.8         | 0.32 |
|                              |                           |                  | Median [Q1, Q3]           | 40.9 [38.0, 44.4] | 39.6 [35.6, 45.2] | 0.34 |
|                              |                           |                  | Min, Max                  | 28.5, 51.9        | 27.5, 50.4        |      |
|                              |                           | 24 週             | n                         | 62                | 63                |      |
|                              |                           |                  | Mean ±SD                  | 40.7 ±5.3         | 39.5 ±5.6         | 0.24 |
|                              |                           |                  | Median [Q1, Q3]           | 41.0 [37.0, 44.4] | 38.9 [35.5, 43.1] | 0.18 |
|                              |                           |                  | Min, Max                  | 28.0, 53.5        | 27.2, 52.2        |      |
|                              | 変化量                       | 12 週             | n                         | 62                | 65                |      |
|                              |                           |                  | Mean ±SD                  | -0.1 ±2.3         | 0.0 ±2.9          | 0.87 |
|                              |                           |                  | Median [Q1, Q3]           | 0.1 [-1.2, 1.3]   | -0.1 [-1.5, 1.6]  | 0.62 |
|                              |                           |                  | Min, Max                  | -6.3, 5.9         | -13.1, 5.1        |      |
| One-sample t-test            |                           |                  | 0.68                      | 0.91              |                   |      |
| Wilcoxon signed-rank test    |                           |                  | 0.84                      | 0.69              |                   |      |
| 24 週                         |                           | n                | 61                        | 62                |                   |      |
|                              |                           | Mean ±SD         | -0.6 ±2.9                 | -0.4 ±2.2         | 0.74              |      |
|                              | Median [Q1, Q3]           | -0.5 [-1.5, 1.3] | -0.5 [-2.4, 1.2]          | 0.68              |                   |      |
|                              | Min, Max                  | -12.1, 4.9       | -5.0, 5.0                 |                   |                   |      |
|                              | One-sample t-test         | 0.13             | 0.15                      |                   |                   |      |
|                              | Wilcoxon signed-rank test | 0.36             | 0.12                      |                   |                   |      |
| 血血小板数 (×10 <sup>4</sup> /μL) | 測定値                       | 0 週              | n                         | 63                | 66                |      |
|                              |                           |                  | Mean ±SD                  | 20.3 ±8.1         | 20.0 ±6.6         | 0.80 |
|                              |                           |                  | Median [Q1, Q3]           | 19.5 [15.5, 22.2] | 19.3 [15.7, 22.6] | 0.90 |
|                              |                           |                  | Min, Max                  | 8.6, 68.6         | 9.9, 46.8         |      |

## 5. 副次評価項目

## 5.2. PPS

## バイタルサイン、一般血液・尿検査

|                           |                           |                 |                           |                   |                   |      |
|---------------------------|---------------------------|-----------------|---------------------------|-------------------|-------------------|------|
|                           |                           | 12 週            | n                         | 63                | 66                |      |
|                           |                           |                 | Mean ±SD                  | 20.6±6.4          | 20.2±5.6          | 0.72 |
|                           |                           |                 | Median [Q1, Q3]           | 19.7 [16.6, 23.1] | 20.1 [15.9, 23.5] | 0.90 |
|                           |                           |                 | Min, Max                  | 8.0, 37.1         | 10.1, 37.1        |      |
|                           |                           | 24 週            | n                         | 62                | 63                |      |
|                           |                           |                 | Mean ±SD                  | 20.3±5.6          | 19.4±5.4          | 0.36 |
|                           |                           |                 | Median [Q1, Q3]           | 19.9 [17.0, 23.6] | 18.9 [16.2, 22.5] | 0.39 |
|                           |                           |                 | Min, Max                  | 8.6, 39.4         | 8.0, 37.0         |      |
|                           | 変化量                       | 12 週            | n                         | 62                | 65                |      |
|                           |                           |                 | Mean ±SD                  | 0.3±5.9           | 0.7±3.8           | 0.67 |
|                           |                           |                 | Median [Q1, Q3]           | 0.5 [-0.5, 2.1]   | 0.3 [-0.9, 1.8]   | 0.58 |
|                           |                           |                 | Min, Max                  | -35.2, 14.3       | -7.3, 21.7        |      |
|                           |                           |                 | One-sample t-test         | 0.65              | 0.14              |      |
|                           |                           |                 | Wilcoxon signed-rank test | 0.038             | 0.13              |      |
| 24 週                      |                           | n               | 61                        | 62                |                   |      |
|                           |                           | Mean ±SD        | 0.9±2.9                   | 0.0±2.7           | 0.09              |      |
| AST (IU/L)                | 測定値                       | 0 週             | n                         | 63                | 66                |      |
|                           |                           |                 | Mean ±SD                  | 26.2±12.7         | 23.5±10.3         | 0.19 |
|                           |                           |                 | Median [Q1, Q3]           | 24.0 [19.0, 29.0] | 21.0 [17.0, 27.0] | 0.06 |
|                           |                           |                 | Min, Max                  | 13.0, 106.0       | 12.0, 85.0        |      |
|                           |                           | 12 週            | n                         | 63                | 66                |      |
|                           |                           |                 | Mean ±SD                  | 26.4±9.2          | 24.5±8.3          | 0.22 |
|                           |                           |                 | Median [Q1, Q3]           | 25.0 [20.0, 30.0] | 23.0 [19.0, 28.0] | 0.19 |
|                           |                           |                 | Min, Max                  | 14.0, 63.0        | 11.0, 57.0        |      |
|                           |                           | 24 週            | n                         | 62                | 63                |      |
|                           |                           |                 | Mean ±SD                  | 25.4±6.7          | 24.0±7.6          | 0.31 |
|                           |                           |                 | Median [Q1, Q3]           | 24.0 [20.0, 31.0] | 22.0 [19.0, 27.0] | 0.20 |
|                           |                           |                 | Min, Max                  | 16.0, 45.0        | 13.0, 47.0        |      |
|                           | 変化量                       | 12 週            | n                         | 62                | 65                |      |
|                           |                           |                 | Mean ±SD                  | 0.3±11.8          | 0.9±6.9           | 0.71 |
| Median [Q1, Q3]           |                           |                 | 1.0 [-2.0, 2.0]           | 1.0 [-2.0, 5.0]   | 0.53              |      |
| Min, Max                  |                           |                 | -73.0, 35.0               | -28.0, 13.0       |                   |      |
| One-sample t-test         |                           |                 | 0.85                      | 0.28              |                   |      |
| Wilcoxon signed-rank test |                           |                 | 0.21                      | 0.040             |                   |      |
| 24 週                      | n                         | 61              | 62                        |                   |                   |      |
|                           | Mean ±SD                  | -0.4±10.8       | 1.3±6.0                   | 0.29              |                   |      |
|                           | Median [Q1, Q3]           | 1.0 [-3.0, 4.0] | 1.0 [-2.0, 4.0]           | 0.57              |                   |      |
|                           | Min, Max                  | -73.0, 11.0     | -18.0, 19.0               |                   |                   |      |
|                           | One-sample t-test         | 0.77            | 0.10                      |                   |                   |      |
|                           | Wilcoxon signed-rank test | 0.25            | 0.06                      |                   |                   |      |
| ALT (IU/L)                | 測定値                       | 0 週             | n                         | 63                | 66                |      |
|                           |                           |                 | Mean ±SD                  | 20.5±11.8         | 18.1±10.5         | 0.24 |
|                           |                           |                 | Median [Q1, Q3]           | 18.0 [14.0, 25.0] | 16.0 [12.0, 21.0] | 0.05 |
|                           |                           |                 | Min, Max                  | 8.0, 87.0         | 6.0, 63.0         |      |
|                           |                           | 12 週            | n                         | 63                | 66                |      |

## 5. 副次評価項目

## 5.2. PPS

## バイタルサイン、一般血液・尿検査

|               |     |           |                           |                           |                           |                      |                  |      |
|---------------|-----|-----------|---------------------------|---------------------------|---------------------------|----------------------|------------------|------|
|               |     |           | Mean ± SD                 | 21.0 ± 10.5               | 18.2 ± 8.4                | 0.09                 |                  |      |
|               |     |           | Median [Q1, Q3]           | 18.0 [14.0, 28.0]         | 16.0 [13.0, 22.0]         | 0.13                 |                  |      |
|               |     |           | Min, Max                  | 8.0, 60.0                 | 6.0, 48.0                 |                      |                  |      |
|               |     | 24 週      | n                         | 62                        | 63                        |                      |                  |      |
|               |     |           | Mean ± SD                 | 20.5 ± 10.0               | 18.2 ± 9.4                | 0.18                 |                  |      |
|               |     |           | Median [Q1, Q3]           | 19.5 [13.0, 24.0]         | 16.0 [11.0, 23.0]         | 0.12                 |                  |      |
|               |     |           | Min, Max                  | 8.0, 60.0                 | 7.0, 55.0                 |                      |                  |      |
|               | 変化量 | 12 週      | n                         | 62                        | 65                        |                      |                  |      |
|               |     |           |                           | Mean ± SD                 | 0.4 ± 10.5                | 0.1 ± 6.5            | 0.85             |      |
|               |     |           |                           | Median [Q1, Q3]           | 1.0 [-2.0, 4.0]           | 1.0 [-1.0, 3.0]      | 0.94             |      |
|               |     |           |                           | Min, Max                  | -66.0, 21.0               | -27.0, 15.0          |                  |      |
|               |     |           |                           | One-sample t-test         | 0.78                      | 0.92                 |                  |      |
|               |     |           |                           | Wilcoxon signed-rank test | 0.15                      | 0.13                 |                  |      |
|               |     |           | 24 週                      | n                         | 61                        | 62                   |                  |      |
|               |     |           |                           | Mean ± SD                 | 0.1 ± 11.3                | 0.7 ± 8.0            | 0.76             |      |
|               |     |           |                           | Median [Q1, Q3]           | 0.0 [-2.0, 3.0]           | 0.0 [-2.0, 4.0]      | 0.74             |      |
|               |     |           |                           | Min, Max                  | -72.0, 32.0               | -20.0, 47.0          |                  |      |
|               |     |           |                           | One-sample t-test         | 0.94                      | 0.52                 |                  |      |
|               |     |           |                           | Wilcoxon signed-rank test | 0.38                      | 0.52                 |                  |      |
| ALP (IU/L)    |     | 測定値       | 0 週                       | n                         | 60                        | 65                   |                  |      |
|               |     |           |                           |                           | Mean ± SD                 | 228.8 ± 95.0         | 221.8 ± 74.8     | 0.65 |
|               |     |           |                           | Median [Q1, Q3]           | 200.5 [175.5, 239.0]      | 207.0 [175.0, 261.0] | 0.78             |      |
|               |     |           |                           | Min, Max                  | 126.0, 636.0              | 86.0, 473.0          |                  |      |
|               |     |           | 12 週                      | n                         | 60                        | 66                   |                  |      |
|               |     |           |                           | Mean ± SD                 | 237.9 ± 94.1              | 231.9 ± 76.9         | 0.70             |      |
|               |     |           |                           | Median [Q1, Q3]           | 217.0 [181.5, 263.5]      | 216.5 [182.0, 289.0] | 0.98             |      |
|               |     |           |                           | Min, Max                  | 110.0, 658.0              | 94.0, 492.0          |                  |      |
|               |     |           | 24 週                      | n                         | 61                        | 63                   |                  |      |
|               |     |           |                           | Mean ± SD                 | 236.3 ± 91.7              | 234.3 ± 90.5         | 0.90             |      |
|               |     |           |                           | Median [Q1, Q3]           | 220.0 [168.0, 259.0]      | 220.0 [177.0, 266.0] | 0.89             |      |
|               |     |           |                           | Min, Max                  | 122.0, 525.0              | 96.0, 583.0          |                  |      |
|               |     | 変化量       | 12 週                      | n                         | 57                        | 64                   |                  |      |
|               |     |           |                           |                           | Mean ± SD                 | 6.5 ± 37.8           | 11.2 ± 43.2      | 0.53 |
|               |     |           |                           |                           | Median [Q1, Q3]           | 4.0 [-11.0, 22.0]    | 17.5 [1.5, 30.0] | 0.07 |
|               |     |           |                           |                           | Min, Max                  | -91.0, 101.0         | -182.0, 141.0    |      |
|               |     |           |                           |                           | One-sample t-test         | 0.20                 | 0.042            |      |
|               |     |           |                           |                           | Wilcoxon signed-rank test | 0.25                 | <0.001           |      |
|               |     | 24 週      | n                         | 57                        | 61                        |                      |                  |      |
|               |     |           | Mean ± SD                 | 7.2 ± 52.9                | 17.1 ± 52.3               | 0.31                 |                  |      |
|               |     |           | Median [Q1, Q3]           | 3.0 [-17.0, 32.0]         | 15.0 [-7.0, 33.0]         | 0.13                 |                  |      |
|               |     |           | Min, Max                  | -152.0, 222.0             | -173.0, 264.0             |                      |                  |      |
|               |     |           | One-sample t-test         | 0.31                      | 0.013                     |                      |                  |      |
|               |     |           | Wilcoxon signed-rank test | 0.35                      | <0.001                    |                      |                  |      |
| T-Bil (mg/dL) | 測定値 | 0 週       | n                         | 63                        | 66                        |                      |                  |      |
|               |     |           |                           | Mean ± SD                 | 0.89 ± 0.39               | 0.83 ± 0.42          | 0.36             |      |
|               |     |           |                           | Median [Q1, Q3]           | 0.80 [0.60, 1.00]         | 0.72 [0.60, 0.98]    | 0.14             |      |
|               |     |           |                           | Min, Max                  | 0.27, 2.50                | 0.30, 2.79           |                  |      |
|               |     |           | 12 週                      | n                         | 62                        | 66                   |                  |      |
|               |     | Mean ± SD |                           | 0.82 ± 0.35               | 0.78 ± 0.36               | 0.59                 |                  |      |

5. 副次評価項目  
5.2. PPS  
バイタルサイン、一般血液・尿検査

|                            |      |                           |                   |                           |                     |                 |      |
|----------------------------|------|---------------------------|-------------------|---------------------------|---------------------|-----------------|------|
|                            |      |                           | Median [Q1, Q3]   | 0.73 [0.51, 1.00]         | 0.70 [0.50, 0.90]   | 0.45            |      |
|                            |      |                           | Min, Max          | 0.26, 1.70                | 0.30, 2.01          |                 |      |
|                            | 24 週 | n                         |                   | 62                        | 63                  |                 |      |
|                            |      | Mean ± SD                 |                   | 0.81 ± 0.32               | 0.77 ± 0.36         | 0.53            |      |
|                            |      | Median [Q1, Q3]           |                   | 0.80 [0.60, 1.00]         | 0.70 [0.50, 0.90]   | 0.32            |      |
|                            |      | Min, Max                  |                   | 0.29, 1.80                | 0.30, 2.30          |                 |      |
|                            | 変化量  | 12 週                      | n                 | 61                        | 65                  |                 |      |
|                            |      |                           | Mean ± SD         | -0.09 ± 0.31              | -0.04 ± 0.33        | 0.40            |      |
|                            |      |                           | Median [Q1, Q3]   | -0.10 [-0.20, 0.06]       | -0.10 [-0.20, 0.10] | 0.93            |      |
|                            |      | Min, Max                  | -1.00, 0.48       | -0.78, 1.21               |                     |                 |      |
|                            |      | One-sample t-test         | 0.029             | 0.32                      |                     |                 |      |
|                            |      | Wilcoxon signed-rank test | 0.040             | 0.07                      |                     |                 |      |
|                            | 24 週 | 12 週                      | n                 | 61                        | 62                  |                 |      |
|                            |      |                           | Mean ± SD         | -0.09 ± 0.27              | -0.06 ± 0.24        | 0.39            |      |
|                            |      |                           | Median [Q1, Q3]   | -0.10 [-0.20, 0.10]       | -0.10 [-0.20, 0.10] | 0.52            |      |
|                            |      | Min, Max                  | -0.80, 0.50       | -0.60, 0.40               |                     |                 |      |
|                            |      | One-sample t-test         | 0.008             | 0.07                      |                     |                 |      |
|                            |      | Wilcoxon signed-rank test | 0.013             | 0.12                      |                     |                 |      |
| γ GTP(U/L)                 | 測定値  | 0 週                       | n                 | 62                        | 65                  |                 |      |
|                            |      |                           | Mean ± SD         | 50.1 ± 47.9               | 39.0 ± 38.6         | 0.15            |      |
|                            |      |                           | Median [Q1, Q3]   | 32.5 [23.0, 56.0]         | 26.0 [20.0, 40.0]   | 0.044           |      |
|                            |      |                           | Min, Max          | 10.0, 283.0               | 9.0, 235.0          |                 |      |
|                            |      |                           | 12 週              | n                         | 62                  | 66              |      |
|                            |      | Mean ± SD                 |                   | 53.1 ± 50.3               | 46.7 ± 70.5         | 0.56            |      |
|                            |      | Median [Q1, Q3]           |                   | 35.5 [24.0, 60.0]         | 25.5 [18.0, 41.0]   | 0.023           |      |
|                            |      | Min, Max                  |                   | 9.0, 265.0                | 10.0, 522.0         |                 |      |
|                            |      |                           | 24 週              | n                         | 61                  | 63              |      |
|                            |      | Mean ± SD                 |                   | 54.1 ± 53.3               | 37.1 ± 32.1         | 0.033           |      |
|                            |      | Median [Q1, Q3]           |                   | 36.0 [22.0, 60.0]         | 26.0 [17.0, 41.0]   | 0.020           |      |
|                            |      | Min, Max                  |                   | 8.0, 247.0                | 11.0, 174.0         |                 |      |
|                            |      | 変化量                       | 12 週              | n                         | 60                  | 64              |      |
|                            |      |                           |                   | Mean ± SD                 | 2.3 ± 22.9          | 8.5 ± 62.9      | 0.47 |
|                            |      |                           |                   | Median [Q1, Q3]           | 1.0 [-3.5, 7.5]     | 0.0 [-3.0, 3.5] | 0.46 |
|                            |      |                           |                   | Min, Max                  | -71.0, 88.0         | -33.0, 493.0    |      |
|                            |      |                           |                   | One-sample t-test         | 0.44                | 0.28            |      |
|                            |      |                           |                   | Wilcoxon signed-rank test | 0.20                | 0.61            |      |
|                            |      |                           | 24 週              | n                         | 59                  | 61              |      |
|                            |      |                           |                   | Mean ± SD                 | 6.0 ± 28.1          | 0.0 ± 15.4      | 0.15 |
|                            |      |                           |                   | Median [Q1, Q3]           | 0.0 [-5.0, 10.0]    | 1.0 [-3.0, 3.0] | 0.62 |
|                            |      |                           |                   | Min, Max                  | -50.0, 145.0        | -61.0, 41.0     |      |
|                            |      |                           |                   | One-sample t-test         | 0.11                | 0.98            |      |
|                            |      |                           |                   | Wilcoxon signed-rank test | 0.31                | 0.80            |      |
| 対数変換<br>γ GTP(ln<br>(U/L)) | 測定値  | 0 週                       | n                 | 62                        | 65                  |                 |      |
|                            |      |                           | Mean ± SD         | 3.61 ± 0.74               | 3.38 ± 0.69         | 0.07            |      |
|                            |      |                           | Median [Q1, Q3]   | 3.48 [3.14, 4.03]         | 3.26 [3.00, 3.69]   | 0.044           |      |
|                            |      |                           | Min, Max          | 2.30, 5.65                | 2.20, 5.46          |                 |      |
|                            |      |                           | 12 週              | n                         | 62                  | 66              |      |
|                            |      | Mean ± SD                 |                   | 3.68 ± 0.73               | 3.43 ± 0.78         | 0.07            |      |
|                            |      | Median [Q1, Q3]           | 3.57 [3.18, 4.09] | 3.24 [2.89, 3.71]         | 0.023               |                 |      |

5. 副次評価項目  
5.2. PPS  
バイタルサイン、一般血液・尿検査

|                 |                           |                           |                   |                      |                      |       |
|-----------------|---------------------------|---------------------------|-------------------|----------------------|----------------------|-------|
|                 |                           |                           | Min, Max          | 2.20, 5.58           | 2.30, 6.26           |       |
|                 | 24 週                      | n                         |                   | 61                   | 63                   |       |
|                 |                           | Mean ±SD                  |                   | 3.67 ±0.77           | 3.37 ±0.66           | 0.021 |
|                 |                           | Median [Q1, Q3]           |                   | 3.58 [3.09, 4.09]    | 3.26 [2.83, 3.71]    | 0.020 |
|                 |                           | Min, Max                  |                   | 2.08, 5.51           | 2.40, 5.16           |       |
|                 | 変化量                       | 12 週                      | n                 | 60                   | 64                   |       |
|                 |                           | Mean ±SD                  |                   | 0.04 ±0.26           | 0.06 ±0.43           | 0.75  |
|                 |                           | Median [Q1, Q3]           |                   | 0.04 [-0.09, 0.20]   | 0.00 [-0.12, 0.13]   | 0.48  |
|                 |                           | Min, Max                  |                   | -0.67, 0.62          | -0.57, 2.89          |       |
|                 |                           | One-sample t-test         |                   | 0.25                 | 0.28                 |       |
|                 |                           | Wilcoxon signed-rank test |                   | 0.15                 | 0.65                 |       |
|                 |                           | 24 週                      | n                 | 59                   | 61                   |       |
|                 |                           | Mean ±SD                  |                   | 0.09 ±0.38           | 0.02 ±0.26           | 0.25  |
|                 |                           | Median [Q1, Q3]           |                   | 0.00 [-0.14, 0.23]   | 0.01 [-0.14, 0.13]   | 0.53  |
|                 |                           | Min, Max                  |                   | -0.77, 1.46          | -0.59, 0.91          |       |
|                 |                           | One-sample t-test         |                   | 0.09                 | 0.61                 |       |
|                 |                           | Wilcoxon signed-rank test |                   | 0.26                 | 0.81                 |       |
| TC (mg/dL)      | 測定値                       | 0 週                       | n                 | 62                   | 66                   |       |
|                 |                           |                           | Mean ±SD          | 175.2 ±31.0          | 167.6 ±31.9          | 0.18  |
|                 |                           |                           | Median [Q1, Q3]   | 175.0 [154.0, 194.0] | 164.0 [146.0, 187.0] | 0.15  |
|                 |                           |                           | Min, Max          | 110.0, 256.0         | 96.0, 254.0          |       |
|                 |                           | 12 週                      | n                 | 63                   | 66                   |       |
|                 |                           |                           | Mean ±SD          | 170.9 ±37.5          | 170.1 ±38.6          | 0.91  |
|                 |                           |                           | Median [Q1, Q3]   | 169.0 [147.0, 193.0] | 164.0 [142.0, 192.0] | 0.86  |
|                 |                           |                           | Min, Max          | 69.0, 276.0          | 97.0, 264.0          |       |
|                 |                           | 24 週                      | n                 | 62                   | 63                   |       |
|                 |                           |                           | Mean ±SD          | 173.4 ±32.6          | 162.0 ±30.3          | 0.046 |
|                 |                           |                           | Median [Q1, Q3]   | 172.5 [151.0, 191.0] | 161.0 [143.0, 180.0] | 0.08  |
|                 |                           |                           | Min, Max          | 112.0, 249.0         | 97.0, 243.0          |       |
|                 | 変化量                       | 12 週                      | n                 | 61                   | 65                   |       |
|                 |                           |                           | Mean ±SD          | -4.6 ±24.6           | 1.5 ±21.9            | 0.15  |
|                 |                           |                           | Median [Q1, Q3]   | -6.0 [-18.0, 9.0]    | -2.0 [-11.0, 18.0]   | 0.27  |
|                 |                           |                           | Min, Max          | -91.0, 44.0          | -49.0, 51.0          |       |
|                 |                           |                           | One-sample t-test | 0.15                 | 0.59                 |       |
|                 |                           | Wilcoxon signed-rank test | 0.19              | 0.88                 |                      |       |
|                 |                           | 24 週                      | n                 | 60                   | 62                   |       |
|                 |                           |                           | Mean ±SD          | -1.2 ±23.1           | -4.7 ±18.9           | 0.36  |
| Median [Q1, Q3] | 3.0 [-9.5, 12.0]          |                           | -6.0 [-16.0, 5.0] | 0.08                 |                      |       |
|                 | Min, Max                  | -69.0, 69.0               | -70.0, 33.0       |                      |                      |       |
|                 | One-sample t-test         | 0.68                      | 0.05              |                      |                      |       |
|                 | Wilcoxon signed-rank test | 0.67                      | 0.036             |                      |                      |       |
| HDL-C (mg/dL)   | 測定値                       | 0 週                       | n                 | 63                   | 66                   |       |
|                 |                           |                           | Mean ±SD          | 56.3 ±16.3           | 56.0 ±18.4           | 0.91  |
|                 |                           |                           | Median [Q1, Q3]   | 53.0 [47.0, 65.0]    | 51.0 [44.0, 63.0]    | 0.49  |
|                 |                           |                           | Min, Max          | 30.0, 105.0          | 30.0, 135.0          |       |
|                 |                           | 12 週                      | n                 | 62                   | 66                   |       |
|                 |                           |                           | Mean ±SD          | 56.5 ±14.6           | 57.6 ±20.5           | 0.73  |
|                 |                           |                           | Median [Q1, Q3]   | 56.0 [45.0, 65.0]    | 53.0 [44.0, 62.0]    | 0.56  |
|                 |                           |                           | Min, Max          | 27.0, 103.0          | 30.0, 149.0          |       |

5. 副次評価項目  
5.2. PPS  
バイタルサイン、一般血液・尿検査

|               |      |                           |                           |                     |                     |      |
|---------------|------|---------------------------|---------------------------|---------------------|---------------------|------|
|               | 変化量  | 24 週                      | n                         | 61                  | 63                  |      |
|               |      |                           | Mean ±SD                  | 55.7 ±14.2          | 54.3 ±17.4          | 0.63 |
|               |      |                           | Median [Q1, Q3]           | 53.0 [47.0, 62.0]   | 52.0 [44.0, 58.0]   | 0.29 |
|               |      |                           | Min, Max                  | 33.0, 98.0          | 31.0, 139.0         |      |
|               |      | 12 週                      | n                         | 61                  | 65                  |      |
|               |      |                           | Mean ±SD                  | -0.1 ±9.4           | 1.9 ±7.7            | 0.17 |
|               |      |                           | Median [Q1, Q3]           | 1.0 [-5.0, 6.0]     | 0.0 [-3.0, 6.0]     | 0.49 |
|               |      |                           | Min, Max                  | -30.0, 29.0         | -13.0, 26.0         |      |
|               | 24 週 | One-sample t-test         | 0.90                      | 0.047               |                     |      |
|               |      | Wilcoxon signed-rank test | 0.91                      | 0.18                |                     |      |
|               |      | n                         | 60                        | 62                  |                     |      |
|               |      | Mean ±SD                  | -0.5 ±8.6                 | -1.0 ±8.8           | 0.72                |      |
|               |      | Median [Q1, Q3]           | -1.0 [-4.5, 4.5]          | 0.0 [-4.0, 4.0]     | 0.90                |      |
|               |      | Min, Max                  | -23.0, 23.0               | -39.0, 15.0         |                     |      |
| TG (mg/dL)    | 測定値  | 0 週                       | n                         | 62                  | 66                  |      |
|               |      |                           | Mean ±SD                  | 110.9 ±50.5         | 117.7 ±65.3         | 0.51 |
|               |      |                           | Median [Q1, Q3]           | 96.5 [74.0, 145.0]  | 101.5 [73.0, 142.0] | 0.80 |
|               |      |                           | Min, Max                  | 32.0, 280.0         | 44.0, 408.0         |      |
|               |      | 12 週                      | n                         | 59                  | 61                  |      |
|               |      |                           | Mean ±SD                  | 126.8 ±66.5         | 124.2 ±69.7         | 0.83 |
|               |      |                           | Median [Q1, Q3]           | 106.0 [70.0, 169.0] | 104.0 [79.0, 138.0] | 0.94 |
|               |      |                           | Min, Max                  | 42.0, 338.0         | 22.0, 420.0         |      |
|               |      | 24 週                      | n                         | 61                  | 63                  |      |
|               |      |                           | Mean ±SD                  | 111.2 ±56.7         | 108.1 ±55.1         | 0.76 |
|               |      |                           | Median [Q1, Q3]           | 99.0 [70.0, 134.0]  | 97.0 [70.0, 126.0]  | 0.73 |
|               |      |                           | Min, Max                  | 46.0, 362.0         | 47.0, 348.0         |      |
|               | 変化量  | 12 週                      | n                         | 57                  | 61                  |      |
|               |      |                           | Mean ±SD                  | 17.5 ±43.2          | 8.6 ±64.0           | 0.38 |
|               |      |                           | Median [Q1, Q3]           | 14.0 [-6.0, 38.0]   | 2.0 [-14.0, 33.0]   | 0.16 |
|               |      |                           | Min, Max                  | -101.0, 121.0       | -191.0, 284.0       |      |
|               |      | 24 週                      | One-sample t-test         | 0.003               | 0.30                |      |
|               |      |                           | Wilcoxon signed-rank test | 0.002               | 0.27                |      |
| LDL-C (mg/dL) | 測定値  | 0 週                       | n                         | 63                  | 66                  |      |
|               |      |                           | Mean ±SD                  | 101.7 ±30.4         | 94.3 ±24.5          | 0.13 |
|               |      |                           | Median [Q1, Q3]           | 99.0 [80.0, 125.0]  | 92.0 [79.0, 107.0]  | 0.15 |
|               |      |                           | Min, Max                  | 45.0, 176.0         | 38.0, 160.0         |      |
|               |      | 12 週                      | n                         | 62                  | 66                  |      |
|               |      |                           | Mean ±SD                  | 97.6 ±31.7          | 94.5 ±29.8          | 0.56 |
|               |      |                           | Median [Q1, Q3]           | 92.5 [73.0, 116.0]  | 91.5 [76.0, 109.0]  | 0.70 |
|               |      |                           | Min, Max                  | 45.0, 180.0         | 39.0, 174.0         |      |
|               |      | 24 週                      | n                         | 61                  | 63                  |      |

## 5. 副次評価項目

## 5.2. PPS

## バイタルサイン、一般血液・尿検査

|             |                           |                           |                           |                      |                      |      |
|-------------|---------------------------|---------------------------|---------------------------|----------------------|----------------------|------|
|             |                           |                           | Mean ± SD                 | 99.7 ± 27.4          | 91.1 ± 25.5          | 0.08 |
|             |                           |                           | Median [Q1, Q3]           | 101.0 [76.0, 119.0]  | 90.0 [72.0, 110.0]   | 0.09 |
|             |                           |                           | Min, Max                  | 44.0, 156.0          | 35.0, 152.0          |      |
|             | 変化量                       | 12 週                      | n                         | 61                   | 65                   |      |
|             |                           |                           | Mean ± SD                 | -3.6 ± 20.5          | -0.9 ± 17.3          | 0.42 |
|             |                           |                           | Median [Q1, Q3]           | -4.0 [-12.0, 6.0]    | -2.0 [-11.0, 11.0]   | 0.60 |
|             |                           |                           | Min, Max                  | -75.0, 37.0          | -43.0, 47.0          |      |
|             |                           |                           | One-sample t-test         | 0.17                 | 0.67                 |      |
|             |                           |                           | Wilcoxon signed-rank test | 0.18                 | 0.41                 |      |
|             |                           | 24 週                      | n                         | 60                   | 62                   |      |
|             |                           |                           | Mean ± SD                 | -0.8 ± 19.3          | -3.1 ± 13.4          | 0.44 |
|             |                           |                           | Median [Q1, Q3]           | 0.0 [-6.5, 10.0]     | -5.5 [-11.0, 6.0]    | 0.08 |
|             |                           |                           | Min, Max                  | -68.0, 52.0          | -34.0, 26.0          |      |
|             | One-sample t-test         |                           | 0.76                      | 0.07                 |                      |      |
|             |                           | Wilcoxon signed-rank test | 0.82                      | 0.06                 |                      |      |
| Na (mEq/L)  | 測定値                       | 0 週                       | n                         | 63                   | 66                   |      |
|             |                           |                           | Mean ± SD                 | 140.5 ± 3.3          | 140.5 ± 2.2          | 0.91 |
|             |                           |                           | Median [Q1, Q3]           | 141.0 [139.0, 143.0] | 140.0 [139.0, 142.0] | 0.51 |
|             |                           |                           | Min, Max                  | 121.0, 145.0         | 135.0, 146.0         |      |
|             |                           | 12 週                      | n                         | 63                   | 66                   |      |
|             |                           |                           | Mean ± SD                 | 140.4 ± 2.6          | 140.5 ± 3.9          | 0.88 |
|             |                           |                           | Median [Q1, Q3]           | 140.0 [139.0, 142.0] | 141.0 [139.0, 142.0] | 0.39 |
|             |                           |                           | Min, Max                  | 129.0, 146.0         | 114.0, 146.0         |      |
|             |                           | 24 週                      | n                         | 62                   | 63                   |      |
|             |                           |                           | Mean ± SD                 | 140.6 ± 2.5          | 140.4 ± 1.9          | 0.56 |
|             |                           |                           | Median [Q1, Q3]           | 141.0 [139.0, 142.0] | 140.0 [139.0, 142.0] | 0.32 |
|             |                           |                           | Min, Max                  | 134.0, 146.0         | 136.0, 145.0         |      |
|             | 変化量                       | 12 週                      | n                         | 62                   | 65                   |      |
|             |                           |                           | Mean ± SD                 | -0.1 ± 2.2           | 0.0 ± 4.0            | 0.74 |
|             |                           |                           | Median [Q1, Q3]           | 0.0 [-2.0, 1.0]      | 0.0 [-1.0, 2.0]      | 0.09 |
|             |                           |                           | Min, Max                  | -4.0, 8.0            | -27.0, 6.0           |      |
|             |                           |                           | One-sample t-test         | 0.60                 | 0.93                 |      |
|             |                           | Wilcoxon signed-rank test | 0.33                      | 0.21                 |                      |      |
| 24 週        | n                         | 61                        | 62                        |                      |                      |      |
|             | Mean ± SD                 | 0.0 ± 2.5                 | -0.2 ± 2.1                | 0.67                 |                      |      |
|             | Median [Q1, Q3]           | 0.0 [-1.0, 1.0]           | 0.0 [-2.0, 1.0]           | 0.90                 |                      |      |
|             | Min, Max                  | -5.0, 14.0                | -6.0, 7.0                 |                      |                      |      |
|             | One-sample t-test         | 0.96                      | 0.54                      |                      |                      |      |
|             | Wilcoxon signed-rank test | 0.52                      | 0.36                      |                      |                      |      |
| 血糖値 (mg/dL) | 測定値                       | 0 週                       | n                         | 62                   | 66                   |      |
|             |                           |                           | Mean ± SD                 | 105.8 ± 18.8         | 103.8 ± 14.6         | 0.52 |
|             |                           |                           | Median [Q1, Q3]           | 101.5 [93.0, 113.0]  | 101.5 [94.0, 109.0]  | 0.85 |
|             |                           |                           | Min, Max                  | 80.0, 179.0          | 83.0, 151.0          |      |
|             |                           | 12 週                      | n                         | 61                   | 60                   |      |
|             |                           |                           | Mean ± SD                 | 111.4 ± 22.8         | 114.3 ± 27.8         | 0.53 |
|             |                           |                           | Median [Q1, Q3]           | 105.0 [98.0, 121.0]  | 106.0 [95.0, 125.0]  | 0.97 |
|             |                           |                           | Min, Max                  | 49.0, 192.0          | 57.0, 194.0          |      |
|             |                           | 24 週                      | n                         | 61                   | 63                   |      |
|             |                           |                           | Mean ± SD                 | 107.4 ± 19.7         | 106.2 ± 17.0         | 0.72 |

## 5. 副次評価項目

## 5.2. PPS

## バイタルサイン、一般血液・尿検査

|                    |                           |                 |                           |                     |                     |      |
|--------------------|---------------------------|-----------------|---------------------------|---------------------|---------------------|------|
|                    | 変化量                       | 12 週            | Median [Q1, Q3]           | 103.0 [96.0, 115.0] | 102.0 [96.0, 114.0] | 0.66 |
|                    |                           |                 | Min, Max                  | 77.0, 186.0         | 83.0, 162.0         |      |
|                    |                           | 12 週            | n                         | 59                  | 60                  |      |
|                    |                           |                 | Mean ±SD                  | 6.3 ±18.6           | 10.4 ±20.0          | 0.25 |
|                    |                           |                 | Median [Q1, Q3]           | 5.0 [-1.0, 17.0]    | 7.0 [-1.0, 17.0]    | 0.62 |
|                    |                           |                 | Min, Max                  | -74.0, 47.0         | -42.0, 79.0         |      |
|                    |                           |                 | One-sample t-test         | 0.012               | <0.001              |      |
|                    |                           |                 | Wilcoxon signed-rank test | <0.001              | <0.001              |      |
|                    |                           | 24 週            | n                         | 59                  | 62                  |      |
|                    |                           |                 | Mean ±SD                  | 1.3 ±12.2           | 2.1 ±11.6           | 0.73 |
|                    |                           |                 | Median [Q1, Q3]           | 2.0 [-5.0, 7.0]     | 2.5 [-2.0, 6.0]     | 0.78 |
|                    |                           |                 | Min, Max                  | -33.0, 41.0         | -45.0, 53.0         |      |
|                    |                           |                 | One-sample t-test         | 0.42                | 0.17                |      |
|                    |                           |                 | Wilcoxon signed-rank test | 0.37                | 0.049               |      |
| BUN(血中浸透圧) (mg/dL) | 測定値                       | 0 週             | n                         | 63                  | 66                  |      |
|                    |                           |                 | Mean ±SD                  | 19.8 ±6.4           | 19.6 ±5.2           | 0.82 |
|                    |                           |                 | Median [Q1, Q3]           | 18.2 [15.0, 23.0]   | 18.8 [16.0, 22.0]   | 0.78 |
|                    |                           |                 | Min, Max                  | 10.0, 42.0          | 10.0, 35.0          |      |
|                    |                           | 12 週            | n                         | 63                  | 66                  |      |
|                    |                           |                 | Mean ±SD                  | 20.6 ±8.5           | 20.1 ±8.7           | 0.74 |
|                    |                           |                 | Median [Q1, Q3]           | 18.0 [15.0, 23.5]   | 19.0 [15.0, 22.0]   | 0.72 |
|                    |                           |                 | Min, Max                  | 11.0, 67.0          | 9.0, 70.0           |      |
|                    |                           | 24 週            | n                         | 62                  | 63                  |      |
|                    |                           |                 | Mean ±SD                  | 21.0 ±9.0           | 19.4 ±6.2           | 0.25 |
|                    |                           |                 | Median [Q1, Q3]           | 19.0 [15.2, 25.0]   | 19.0 [15.8, 21.6]   | 0.58 |
|                    |                           |                 | Min, Max                  | 9.0, 57.0           | 8.0, 47.0           |      |
|                    | 変化量                       | 12 週            | n                         | 62                  | 65                  |      |
|                    |                           |                 | Mean ±SD                  | 1.0 ±5.6            | 0.5 ±7.8            | 0.68 |
|                    |                           |                 | Median [Q1, Q3]           | 0.9 [-2.0, 4.0]     | 0.0 [-3.0, 3.0]     | 0.53 |
|                    |                           |                 | Min, Max                  | -9.7, 25.0          | -18.7, 48.0         |      |
|                    |                           |                 | One-sample t-test         | 0.17                | 0.62                |      |
|                    |                           |                 | Wilcoxon signed-rank test | 0.22                | 0.80                |      |
| 24 週               | n                         | 61              | 62                        |                     |                     |      |
|                    | Mean ±SD                  | 1.3 ±6.2        | -0.1 ±5.2                 | 0.17                |                     |      |
|                    | Median [Q1, Q3]           | 1.0 [-2.0, 3.0] | 0.0 [-2.0, 3.0]           | 0.32                |                     |      |
|                    | Min, Max                  | -13.0, 27.0     | -17.3, 21.0               |                     |                     |      |
|                    | One-sample t-test         | 0.10            | 0.89                      |                     |                     |      |
|                    | Wilcoxon signed-rank test | 0.16            | 1.00                      |                     |                     |      |
| 血清クレアチニン(mg/dL)    | 測定値                       | 0 週             | n                         | 63                  | 65                  |      |
|                    |                           |                 | Mean ±SD                  | 1.06 ±0.21          | 1.03 ±0.24          | 0.39 |
|                    |                           |                 | Median [Q1, Q3]           | 1.07 [0.89, 1.19]   | 0.97 [0.87, 1.17]   | 0.21 |
|                    |                           |                 | Min, Max                  | 0.65, 1.63          | 0.58, 1.71          |      |
|                    |                           | 12 週            | n                         | 63                  | 66                  |      |
|                    |                           |                 | Mean ±SD                  | 1.06 ±0.23          | 1.05 ±0.30          | 0.73 |
|                    |                           |                 | Median [Q1, Q3]           | 1.08 [0.84, 1.18]   | 0.97 [0.84, 1.22]   | 0.41 |
|                    |                           |                 | Min, Max                  | 0.72, 1.69          | 0.53, 2.00          |      |
|                    |                           | 24 週            | n                         | 62                  | 63                  |      |
|                    |                           |                 | Mean ±SD                  | 1.07 ±0.28          | 1.04 ±0.29          | 0.59 |
|                    |                           |                 | Median [Q1, Q3]           | 1.05 [0.83, 1.20]   | 0.96 [0.83, 1.25]   | 0.48 |
|                    |                           |                 |                           |                     |                     |      |



5. 副次評価項目  
5.2. PPS  
バイタルサイン、一般血液・尿検査

|                                      |      |                           |                           |                    |                   |      |
|--------------------------------------|------|---------------------------|---------------------------|--------------------|-------------------|------|
|                                      |      | Min, Max                  | 0.57, 2.20                | 0.56, 2.01         |                   |      |
| 変化量                                  | 12 週 | n                         | 62                        | 64                 |                   |      |
|                                      |      | Mean ±SD                  | 0.01 ±0.11                | 0.02 ±0.18         | 0.73              |      |
|                                      |      | Median [Q1, Q3]           | 0.01 [-0.04, 0.07]        | 0.02 [-0.05, 0.08] | 0.86              |      |
|                                      |      | Min, Max                  | -0.33, 0.25               | -0.86, 0.63        |                   |      |
|                                      |      | One-sample t-test         | 0.57                      | 0.43               |                   |      |
|                                      |      | Wilcoxon signed-rank test | 0.38                      | 0.29               |                   |      |
|                                      | 24 週 | n                         | 61                        | 61                 |                   |      |
|                                      |      | Mean ±SD                  | 0.02 ±0.17                | 0.02 ±0.14         | 0.90              |      |
|                                      |      | Median [Q1, Q3]           | -0.01 [-0.05, 0.06]       | 0.03 [-0.06, 0.10] | 0.29              |      |
|                                      |      | Min, Max                  | -0.30, 0.74               | -0.35, 0.42        |                   |      |
|                                      |      | One-sample t-test         | 0.39                      | 0.22               |                   |      |
|                                      |      | Wilcoxon signed-rank test | 0.92                      | 0.18               |                   |      |
| クレアチニン・クリアランス<br>(mL/min)            | 測定値  | 0 週                       | n                         | 63                 | 65                |      |
|                                      |      |                           | Mean ±SD                  | 63.0 ±31.4         | 67.5 ±30.0        | 0.41 |
|                                      |      |                           | Median [Q1, Q3]           | 55.9 [42.8, 79.5]  | 61.4 [45.7, 78.1] | 0.22 |
|                                      |      |                           | Min, Max                  | 25.8, 204.0        | 31.4, 164.6       |      |
|                                      | 12 週 | n                         | 58                        | 61                 |                   |      |
|                                      |      | Mean ±SD                  | 60.5 ±30.2                | 66.3 ±31.9         | 0.31              |      |
|                                      |      | Median [Q1, Q3]           | 52.2 [41.0, 71.4]         | 57.1 [43.4, 82.1]  | 0.32              |      |
|                                      |      | Min, Max                  | 21.6, 213.3               | 19.3, 182.2        |                   |      |
|                                      | 24 週 | n                         | 60                        | 62                 |                   |      |
|                                      |      | Mean ±SD                  | 62.8 ±32.7                | 65.3 ±31.2         | 0.67              |      |
|                                      |      | Median [Q1, Q3]           | 55.9 [42.1, 75.5]         | 56.6 [40.6, 81.7]  | 0.67              |      |
|                                      |      | Min, Max                  | 21.3, 216.7               | 27.3, 172.4        |                   |      |
|                                      | 変化量  | 12 週                      | n                         | 58                 | 59                |      |
|                                      |      |                           | Mean ±SD                  | -0.7 ±5.3          | -0.1 ±10.6        | 0.69 |
|                                      |      |                           | Median [Q1, Q3]           | -1.0 [-4.7, 1.7]   | -1.7 [-6.2, 5.8]  | 0.95 |
|                                      |      |                           | Min, Max                  | -12.4, 12.2        | -24.4, 45.6       |      |
|                                      |      |                           | One-sample t-test         | 0.30               | 0.94              |      |
|                                      |      |                           | Wilcoxon signed-rank test | 0.16               | 0.60              |      |
|                                      |      | 24 週                      | n                         | 59                 | 60                |      |
|                                      |      |                           | Mean ±SD                  | 0.5 ±7.5           | -1.0 ±8.9         | 0.32 |
|                                      |      |                           | Median [Q1, Q3]           | 0.2 [-2.8, 3.4]    | -2.7 [-7.1, 4.2]  | 0.16 |
|                                      |      |                           | Min, Max                  | -18.6, 30.6        | -26.4, 24.4       |      |
|                                      |      |                           | One-sample t-test         | 0.63               | 0.37              |      |
|                                      |      |                           | Wilcoxon signed-rank test | 0.70               | 0.20              |      |
| eGFR<br>(mL/min/1.73m <sup>2</sup> ) | 測定値  | 0 週                       | n                         | 63                 | 65                |      |
|                                      |      |                           | Mean ±SD                  | 53.5 ±15.0         | 56.7 ±16.9        | 0.25 |
|                                      |      |                           | Median [Q1, Q3]           | 50.9 [43.1, 62.4]  | 54.0 [43.8, 66.8] | 0.36 |
|                                      |      |                           | Min, Max                  | 29.4, 94.2         | 30.1, 98.3        |      |
|                                      |      | 12 週                      | n                         | 63                 | 66                |      |
|                                      |      |                           | Mean ±SD                  | 53.5 ±14.8         | 55.9 ±17.6        | 0.41 |
|                                      |      |                           | Median [Q1, Q3]           | 51.1 [43.3, 64.6]  | 52.9 [40.1, 69.2] | 0.62 |
|                                      |      |                           | Min, Max                  | 26.7, 95.7         | 27.3, 99.6        |      |
|                                      |      | 24 週                      | n                         | 62                 | 63                |      |
|                                      |      |                           | Mean ±SD                  | 53.8 ±16.0         | 55.5 ±16.8        | 0.56 |
|                                      |      |                           | Median [Q1, Q3]           | 52.1 [43.4, 64.3]  | 52.6 [41.5, 68.5] | 0.69 |
|                                      |      |                           | Min, Max                  | 23.1, 95.0         | 27.2, 93.0        |      |

## 5. 副次評価項目

## 5.2. PPS

## バイタルサイン、一般血液・尿検査

|                            |                           |                           |                           |                      |                      |      |
|----------------------------|---------------------------|---------------------------|---------------------------|----------------------|----------------------|------|
|                            | 変化量                       | 12 週                      | n                         | 62                   | 64                   |      |
|                            |                           |                           | Mean ±SD                  | -0.2 ±5.4            | -0.1 ±8.5            | 0.94 |
|                            |                           |                           | Median [Q1, Q3]           | -0.5 [-3.8, 2.8]     | -1.4 [-5.2, 4.3]     | 0.88 |
|                            |                           |                           | Min, Max                  | -14.6, 16.2          | -17.0, 40.5          |      |
|                            |                           |                           | One-sample t-test         | 0.77                 | 0.93                 |      |
|                            |                           |                           | Wilcoxon signed-rank test | 0.57                 | 0.61                 |      |
|                            | 24 週                      | n                         | 61                        | 61                   |                      |      |
|                            |                           | Mean ±SD                  | 0.1 ±7.5                  | -0.5 ±6.9            | 0.69                 |      |
|                            |                           | Median [Q1, Q3]           | 0.8 [-3.7, 3.7]           | -1.8 [-5.3, 4.0]     | 0.29                 |      |
|                            |                           | Min, Max                  | -22.1, 28.3               | -14.4, 17.6          |                      |      |
|                            |                           | One-sample t-test         | 0.96                      | 0.60                 |                      |      |
|                            |                           | Wilcoxon signed-rank test | 0.80                      | 0.39                 |                      |      |
| 尿中クレアチン<br>(mg/dl)         | 測定値                       | 0 週                       | n                         | 54                   | 55                   |      |
|                            |                           |                           | Mean ±SD                  | 99.5 ±56.7           | 105.9 ±59.1          | 0.57 |
|                            |                           |                           | Median [Q1, Q3]           | 91.0 [62.7, 138.0]   | 96.0 [60.0, 155.0]   | 0.52 |
|                            |                           |                           | Min, Max                  | 14.0, 252.0          | 16.0, 277.0          |      |
|                            |                           | 12 週                      | n                         | 52                   | 55                   |      |
|                            |                           |                           | Mean ±SD                  | 99.3 ±65.9           | 92.7 ±69.3           | 0.61 |
|                            |                           |                           | Median [Q1, Q3]           | 90.0 [51.9, 123.5]   | 73.0 [37.0, 123.0]   | 0.45 |
|                            |                           |                           | Min, Max                  | 11.0, 334.0          | 7.0, 344.0           |      |
|                            |                           | 24 週                      | n                         | 52                   | 53                   |      |
|                            |                           |                           | Mean ±SD                  | 101.6 ±83.7          | 87.4 ±50.7           | 0.29 |
|                            |                           |                           | Median [Q1, Q3]           | 88.0 [50.5, 132.0]   | 83.0 [44.0, 130.0]   | 0.68 |
|                            |                           |                           | Min, Max                  | 14.8, 478.0          | 15.0, 238.0          |      |
|                            | 変化量                       | 12 週                      | n                         | 52                   | 54                   |      |
|                            |                           |                           | Mean ±SD                  | -1.4 ±76.8           | -14.5 ±76.0          | 0.38 |
|                            |                           |                           | Median [Q1, Q3]           | 6.1 [-36.8, 35.5]    | -9.0 [-56.0, 32.0]   | 0.39 |
|                            |                           |                           | Min, Max                  | -197.0, 280.0        | -214.0, 158.0        |      |
|                            |                           |                           | One-sample t-test         | 0.90                 | 0.17                 |      |
|                            |                           |                           | Wilcoxon signed-rank test | 0.99                 | 0.22                 |      |
| 24 週                       | n                         | 52                        | 52                        |                      |                      |      |
|                            | Mean ±SD                  | 0.5 ±82.1                 | -15.4 ±60.0               | 0.26                 |                      |      |
|                            | Median [Q1, Q3]           | -14.0 [-47.4, 34.0]       | -12.0 [-43.0, 20.0]       | 0.51                 |                      |      |
|                            | Min, Max                  | -180.0, 328.0             | -206.0, 120.0             |                      |                      |      |
|                            | One-sample t-test         | 0.96                      | 0.07                      |                      |                      |      |
|                            | Wilcoxon signed-rank test | 0.52                      | 0.08                      |                      |                      |      |
| 尿中浸透圧<br>(mOsm/Kg・<br>H2O) | 測定値                       | 0 週                       | n                         | 53                   | 56                   |      |
|                            |                           |                           | Mean ±SD                  | 515.7 ±193.4         | 554.7 ±197.7         | 0.30 |
|                            |                           |                           | Median [Q1, Q3]           | 521.0 [405.0, 657.0] | 586.0 [408.5, 699.5] | 0.31 |
|                            |                           |                           | Min, Max                  | 163.0, 946.0         | 188.0, 1018.0        |      |
|                            |                           | 12 週                      | n                         | 51                   | 55                   |      |
|                            |                           |                           | Mean ±SD                  | 494.1 ±154.9         | 518.5 ±189.2         | 0.47 |
|                            |                           |                           | Median [Q1, Q3]           | 506.0 [394.0, 598.0] | 514.0 [358.0, 652.0] | 0.52 |
|                            |                           |                           | Min, Max                  | 144.5, 987.0         | 192.0, 1130.0        |      |
|                            |                           | 24 週                      | n                         | 52                   | 52                   |      |
|                            |                           |                           | Mean ±SD                  | 531.7 ±195.8         | 493.9 ±194.8         | 0.33 |
|                            |                           |                           | Median [Q1, Q3]           | 550.0 [402.0, 681.5] | 476.5 [352.5, 626.0] | 0.37 |
|                            |                           |                           | Min, Max                  | 174.0, 1039.0        | 130.0, 863.0         |      |
|                            | 変化量                       | 12 週                      | n                         | 50                   | 55                   |      |

5. 副次評価項目

5.2. PPS

バイタルサイン、一般血液・尿検査

|  |      |                           |                      |                      |      |
|--|------|---------------------------|----------------------|----------------------|------|
|  |      | Mean ± SD                 | -25.4 ± 188.7        | -37.9 ± 205.9        | 0.75 |
|  |      | Median [Q1, Q3]           | -22.0 [-148.0, 92.0] | -62.0 [-178.0, 80.0] | 0.57 |
|  |      | Min, Max                  | -503.5, 432.0        | -475.0, 594.0        |      |
|  |      | One-sample t-test         | 0.35                 | 0.18                 |      |
|  |      | Wilcoxon signed-rank test | 0.27                 | 0.10                 |      |
|  | 24 週 | n                         | 51                   | 52                   |      |
|  |      | Mean ± SD                 | 8.8 ± 189.7          | -55.3 ± 161.0        | 0.07 |
|  |      | Median [Q1, Q3]           | -8.0 [-125.0, 147.0] | -37.0 [-116.5, 11.5] | 0.10 |
|  |      | Min, Max                  | -381.0, 556.0        | -614.0, 447.0        |      |
|  |      | One-sample t-test         | 0.74                 | 0.017                |      |
|  |      | Wilcoxon signed-rank test | 0.97                 | 0.005                |      |

5. 副次評価項目  
5.2. PPS  
心臓超音波検査パラメーター

表 5.2.9. [PPS] 心臓超音波検査パラメーター

| 変数                                    | 観察<br>ポイント | 統計量                       | トピロキソスタット群        | アロプリノール群          | 群間比較<br>P 値 |  |
|---------------------------------------|------------|---------------------------|-------------------|-------------------|-------------|--|
| 左室駆出率<br>(EF)<br>(M.simpson 法)<br>(%) | 測定値        | 0 週                       | n                 | 64                | 65          |  |
|                                       |            | Mean ±SD                  | 53.1 ± 12.6       | 51.2 ± 13.0       | 0.40        |  |
|                                       |            | Median [Q1, Q3]           | 55.0 [44.0, 61.9] | 55.0 [44.0, 61.0] | 0.50        |  |
|                                       |            | Min, Max                  | 25.2, 74.0        | 19.3, 71.4        |             |  |
|                                       | 24 週       | n                         | 60                | 62                |             |  |
|                                       |            | Mean ±SD                  | 53.3 ± 12.5       | 52.7 ± 13.8       | 0.79        |  |
|                                       |            | Median [Q1, Q3]           | 55.8 [43.2, 62.8] | 54.9 [44.4, 61.5] | 0.80        |  |
|                                       |            | Min, Max                  | 20.7, 75.0        | 21.8, 77.7        |             |  |
|                                       | 変化量        | 24 週                      | n                 | 60                | 61          |  |
|                                       |            | Mean ±SD                  | -0.1 ± 5.5        | 1.4 ± 5.2         | 0.13        |  |
|                                       |            | Median [Q1, Q3]           | -0.3 [-3.9, 3.0]  | 1.0 [-2.5, 4.0]   | 0.12        |  |
|                                       |            | Min, Max                  | -12.0, 12.1       | -10.0, 17.0       |             |  |
|                                       |            | One-sample t-test         | 0.94              | 0.039             |             |  |
|                                       |            | Wilcoxon signed-rank test | 0.81              | 0.09              |             |  |
| 左室拡張末期<br>径(LVDd)<br>(mm)             | 測定値        | 0 週                       | n                 | 62                | 67          |  |
|                                       |            | Mean ±SD                  | 52.8 ± 8.2        | 53.0 ± 8.8        | 0.89        |  |
|                                       |            | Median [Q1, Q3]           | 51.4 [47.3, 56.1] | 51.7 [46.8, 57.4] | 0.85        |  |
|                                       |            | Min, Max                  | 38.1, 78.4        | 36.0, 76.2        |             |  |
|                                       | 24 週       | n                         | 59                | 63                |             |  |
|                                       |            | Mean ±SD                  | 51.3 ± 8.0        | 52.3 ± 9.8        | 0.54        |  |
|                                       |            | Median [Q1, Q3]           | 50.2 [47.3, 55.3] | 51.4 [47.1, 56.4] | 0.49        |  |
|                                       |            | Min, Max                  | 31.5, 72.4        | 10.5, 77.8        |             |  |
|                                       | 変化量        | 24 週                      | n                 | 57                | 63          |  |
|                                       |            | Mean ±SD                  | -0.8 ± 5.9        | -1.0 ± 6.6        | 0.91        |  |
|                                       |            | Median [Q1, Q3]           | -0.8 [-3.8, 2.4]  | -0.5 [-3.5, 1.9]  | 0.94        |  |
|                                       |            | Min, Max                  | -20.7, 16.2       | -36.3, 16.0       |             |  |
|                                       |            | One-sample t-test         | 0.30              | 0.26              |             |  |
|                                       |            | Wilcoxon signed-rank test | 0.31              | 0.33              |             |  |
| 左室収縮末期<br>径(LVDs) (mm)                | 測定値        | 0 週                       | n                 | 58                | 65          |  |
|                                       |            | Mean ±SD                  | 38.2 ± 10.5       | 38.0 ± 11.1       | 0.94        |  |
|                                       |            | Median [Q1, Q3]           | 35.8 [30.9, 46.1] | 36.1 [31.0, 43.2] | 1.00        |  |
|                                       |            | Min, Max                  | 20.6, 68.2        | 12.7, 70.7        |             |  |
|                                       | 24 週       | n                         | 58                | 60                |             |  |
|                                       |            | Mean ±SD                  | 36.6 ± 9.2        | 38.2 ± 11.1       | 0.39        |  |
|                                       |            | Median [Q1, Q3]           | 35.7 [29.7, 41.6] | 36.4 [31.7, 45.2] | 0.53        |  |
|                                       |            | Min, Max                  | 20.0, 56.4        | 7.9, 69.9         |             |  |
|                                       | 変化量        | 24 週                      | n                 | 52                | 58          |  |
|                                       |            | Mean ±SD                  | -0.5 ± 5.3        | -0.1 ± 8.0        | 0.77        |  |
|                                       |            | Median [Q1, Q3]           | 0.0 [-3.3, 2.8]   | -0.8 [-2.8, 3.0]  | 0.99        |  |
|                                       |            | Min, Max                  | -17.2, 15.6       | -26.6, 39.3       |             |  |
|                                       |            | One-sample t-test         | 0.49              | 0.91              |             |  |
|                                       |            | Wilcoxon signed-rank test | 0.54              | 0.48              |             |  |
| 僧帽弁口血流<br>速波形(E)<br>(cm/sec)          | 測定値        | 0 週                       | n                 | 64                | 67          |  |
|                                       |            | Mean ±SD                  | 80.4 ± 41.3       | 75.0 ± 37.7       | 0.44        |  |
|                                       |            | Median [Q1, Q3]           | 72.6 [55.1, 92.0] | 64.3 [51.0, 87.9] | 0.33        |  |
|                                       |            | Min, Max                  | 37.3, 268.0       | 26.4, 214.8       |             |  |

5. 副次評価項目  
5.2. PPS  
心臓超音波検査パラメーター

|                           |                          |                 |                           |                      |                      |                      |      |
|---------------------------|--------------------------|-----------------|---------------------------|----------------------|----------------------|----------------------|------|
|                           | 24 週                     | n               | 61                        | 63                   |                      |                      |      |
|                           |                          | Mean ±SD        | 76.9±38.2                 | 82.3±41.1            | 0.45                 |                      |      |
|                           |                          | Median [Q1, Q3] | 68.5 [55.1, 85.9]         | 77.5 [53.3, 98.2]    | 0.48                 |                      |      |
|                           |                          | Min, Max        | 25.3, 241.0               | 31.0, 245.5          |                      |                      |      |
|                           | 変化量                      | 24 週            | n                         | 61                   | 63                   |                      |      |
|                           |                          |                 | Mean ±SD                  | -3.4±17.0            | 6.1±22.0             | 0.008                |      |
|                           |                          |                 | Median [Q1, Q3]           | -1.0 [-10.9, 6.1]    | 4.0 [-7.5, 14.8]     | 0.018                |      |
|                           |                          |                 | Min, Max                  | -48.9, 44.2          | -42.8, 96.1          |                      |      |
|                           |                          |                 | One-sample t-test         | 0.12                 | 0.031                |                      |      |
|                           |                          |                 | Wilcoxon signed-rank test | 0.14                 | 0.07                 |                      |      |
| 僧帽弁口血流速度波形(A)<br>(cm/sec) | 測定値                      | 0 週             | n                         | 32                   | 40                   |                      |      |
|                           |                          |                 | Mean ±SD                  | 67.6±24.8            | 74.4±26.1            | 0.27                 |      |
|                           |                          |                 | Median [Q1, Q3]           | 71.4 [52.5, 87.7]    | 69.2 [58.5, 84.5]    | 0.65                 |      |
|                           |                          |                 | Min, Max                  | 21.6, 113.0          | 30.9, 181.0          |                      |      |
|                           |                          | 24 週            | n                         | 33                   | 35                   |                      |      |
|                           |                          |                 | Mean ±SD                  | 62.1±25.5            | 72.9±24.3            | 0.08                 |      |
|                           |                          |                 | Median [Q1, Q3]           | 64.7 [50.7, 80.7]    | 68.3 [57.3, 86.9]    | 0.13                 |      |
|                           |                          |                 | Min, Max                  | 14.6, 119.0          | 26.9, 122.0          |                      |      |
|                           | 変化量                      | 24 週            | n                         | 31                   | 34                   |                      |      |
|                           |                          |                 | Mean ±SD                  | -4.2±17.9            | -3.8±21.1            | 0.93                 |      |
|                           |                          |                 | Median [Q1, Q3]           | -3.2 [-13.8, 5.4]    | -3.5 [-9.7, 4.1]     | 0.72                 |      |
|                           |                          |                 | Min, Max                  | -64.3, 48.4          | -100.0, 42.0         |                      |      |
|                           |                          |                 | One-sample t-test         | 0.20                 | 0.31                 |                      |      |
|                           |                          |                 | Wilcoxon signed-rank test | 0.11                 | 0.28                 |                      |      |
|                           | 僧帽弁口血流速度波形(DT)<br>(msec) | 測定値             | 0 週                       | n                    | 62                   | 66                   |      |
|                           |                          |                 |                           | Mean ±SD             | 202.6±49.9           | 222.2±67.2           | 0.06 |
|                           |                          |                 |                           | Median [Q1, Q3]      | 189.4 [174.1, 224.0] | 209.5 [175.0, 263.5] | 0.15 |
|                           |                          |                 |                           | Min, Max             | 105.6, 375.0         | 100.0, 400.0         |      |
| 24 週                      |                          |                 | n                         | 60                   | 63                   |                      |      |
|                           |                          |                 | Mean ±SD                  | 209.7±74.9           | 227.8±86.5           | 0.22                 |      |
|                           |                          |                 | Median [Q1, Q3]           | 184.0 [160.0, 240.0] | 200.0 [160.0, 258.0] | 0.34                 |      |
|                           |                          |                 | Min, Max                  | 24.0, 531.7          | 104.0, 544.0         |                      |      |
| 変化量                       |                          | 24 週            | n                         | 58                   | 62                   |                      |      |
|                           |                          |                 | Mean ±SD                  | -0.1±51.6            | -0.1±58.2            | 1.00                 |      |
|                           |                          |                 | Median [Q1, Q3]           | 0.0 [-27.9, 33.0]    | -3.8 [-32.0, 33.0]   | 0.73                 |      |
|                           |                          |                 | Min, Max                  | -160.0, 165.0        | -136.0, 156.2        |                      |      |
|                           |                          |                 | One-sample t-test         | 0.98                 | 0.99                 |                      |      |
|                           |                          |                 | Wilcoxon signed-rank test | 0.80                 | 0.85                 |                      |      |
| 左室弁輪運動速度波形(E/e')          |                          | 測定値             | 0 週                       | n                    | 53                   | 65                   |      |
|                           |                          |                 |                           | Mean ±SD             | 13.6±6.5             | 12.9±7.2             | 0.60 |
|                           |                          |                 |                           | Median [Q1, Q3]      | 12.7 [9.3, 15.8]     | 11.7 [8.5, 14.5]     | 0.41 |
|                           |                          |                 |                           | Min, Max             | 4.4, 38.2            | 3.6, 46.2            |      |
|                           | 24 週                     |                 | n                         | 58                   | 61                   |                      |      |
|                           |                          |                 | Mean ±SD                  | 12.0±6.0             | 13.2±6.3             | 0.30                 |      |
|                           |                          |                 | Median [Q1, Q3]           | 10.5 [8.6, 13.6]     | 11.9 [9.2, 15.3]     | 0.18                 |      |
|                           |                          |                 | Min, Max                  | 4.9, 36.5            | 4.4, 34.5            |                      |      |
|                           | 変化量                      | 24 週            | n                         | 49                   | 59                   |                      |      |
|                           |                          |                 | Mean ±SD                  | -1.3±4.6             | 0.4±5.5              | 0.08                 |      |
|                           |                          |                 | Median [Q1, Q3]           | -0.9 [-4.1, 1.3]     | 0.8 [-3.2, 4.6]      | 0.07                 |      |
|                           |                          |                 |                           |                      |                      |                      |      |

5. 副次評価項目  
5.2. PPS  
心臓超音波検査パラメーター

|                            |      |                 |                           |                   |                   |       |
|----------------------------|------|-----------------|---------------------------|-------------------|-------------------|-------|
|                            |      |                 | Min, Max                  | -10.5, 9.3        | -11.7, 13.9       |       |
|                            |      |                 | One-sample t-test         | 0.046             | 0.56              |       |
|                            |      |                 | Wilcoxon signed-rank test | 0.06              | 0.55              |       |
| 下大静脈径<br>(IVCd) (mm)       | 測定値  | 0 週             | n                         | 62                | 62                |       |
|                            |      |                 | Mean ± SD                 | 14.6 ± 5.6        | 14.0 ± 4.1        | 0.49  |
|                            |      |                 | Median [Q1, Q3]           | 14.1 [11.4, 16.8] | 13.6 [10.8, 16.7] | 0.65  |
|                            |      |                 | Min, Max                  | 4.2, 43.0         | 3.2, 27.0         |       |
|                            | 24 週 | n               | 60                        | 61                |                   |       |
|                            |      | Mean ± SD       | 15.9 ± 6.5                | 15.4 ± 6.0        | 0.69              |       |
|                            |      | Median [Q1, Q3] | 14.9 [12.2, 17.8]         | 14.9 [12.1, 17.2] | 0.81              |       |
|                            |      | Min, Max        | 8.0, 49.2                 | 7.8, 51.2         |                   |       |
|                            | 変化量  | 24 週            | n                         | 58                | 57                |       |
|                            |      |                 | Mean ± SD                 | 1.1 ± 5.9         | 1.2 ± 6.3         | 0.97  |
|                            |      |                 | Median [Q1, Q3]           | 0.8 [-3.2, 3.6]   | 0.9 [-1.5, 3.4]   | 0.89  |
|                            |      |                 | Min, Max                  | -6.8, 32.4        | -10.0, 36.5       |       |
|                            |      |                 | One-sample t-test         | 0.15              | 0.17              |       |
|                            |      |                 | Wilcoxon signed-rank test | 0.30              | 0.16              |       |
| 左房短径<br>(LAD) (mm)         | 測定値  | 0 週             | n                         | 64                | 65                |       |
|                            |      |                 | Mean ± SD                 | 45.2 ± 7.2        | 43.3 ± 8.0        | 0.16  |
|                            |      |                 | Median [Q1, Q3]           | 44.4 [39.7, 48.6] | 42.3 [38.6, 47.6] | 0.13  |
|                            |      |                 | Min, Max                  | 30.9, 61.1        | 26.0, 64.8        |       |
|                            | 24 週 | n               | 61                        | 63                |                   |       |
|                            |      | Mean ± SD       | 45.8 ± 7.1                | 44.4 ± 7.6        | 0.27              |       |
|                            |      | Median [Q1, Q3] | 44.9 [42.0, 49.3]         | 44.4 [38.1, 48.2] | 0.22              |       |
|                            |      | Min, Max        | 29.0, 66.8                | 31.8, 65.5        |                   |       |
|                            | 変化量  | 24 週            | n                         | 61                | 61                |       |
|                            |      |                 | Mean ± SD                 | 0.9 ± 4.7         | 1.0 ± 5.5         | 0.87  |
|                            |      |                 | Median [Q1, Q3]           | 0.6 [-1.7, 3.1]   | 0.8 [-2.4, 4.6]   | 0.81  |
|                            |      |                 | Min, Max                  | -13.6, 14.6       | -12.0, 20.6       |       |
|                            |      |                 | One-sample t-test         | 0.16              | 0.16              |       |
|                            |      |                 | Wilcoxon signed-rank test | 0.10              | 0.13              |       |
| 三尖弁圧較差<br>(TRPG)<br>(mmHg) | 測定値  | 0 週             | n                         | 56                | 52                |       |
|                            |      |                 | Mean ± SD                 | 24.0 ± 10.0       | 19.7 ± 6.8        | 0.011 |
|                            |      |                 | Median [Q1, Q3]           | 22.4 [17.5, 28.3] | 18.2 [16.1, 24.2] | 0.008 |
|                            |      |                 | Min, Max                  | 7.4, 70.3         | 4.0, 41.0         |       |
|                            | 24 週 | n               | 52                        | 50                |                   |       |
|                            |      | Mean ± SD       | 23.9 ± 7.4                | 22.5 ± 9.1        | 0.39              |       |
|                            |      | Median [Q1, Q3] | 23.0 [19.1, 28.1]         | 20.6 [16.2, 27.7] | 0.19              |       |
|                            |      | Min, Max        | 10.0, 46.0                | 10.0, 51.0        |                   |       |
|                            | 変化量  | 24 週            | n                         | 49                | 43                |       |
|                            |      |                 | Mean ± SD                 | 0.9 ± 5.3         | 3.1 ± 7.3         | 0.10  |
|                            |      |                 | Median [Q1, Q3]           | 0.0 [-1.8, 5.1]   | 2.0 [-1.0, 7.0]   | 0.14  |
|                            |      |                 | Min, Max                  | -12.1, 13.0       | -13.4, 23.7       |       |
|                            |      |                 | One-sample t-test         | 0.24              | 0.008             |       |
|                            |      |                 | Wilcoxon signed-rank test | 0.27              | 0.005             |       |

## 5. 副次評価項目

## 5.2. PPS

## 特殊血液検査

表 5.2.10. [PPS] 特殊血液検査

| 変数                           | 観察<br>ポイント | 統計量                       | トピロキソスタット群                | アロプリノール群             | 群間比較<br>P 値          |      |
|------------------------------|------------|---------------------------|---------------------------|----------------------|----------------------|------|
| hsCRP(mg/dL)                 | 測定値        | 0 週                       | n                         | 63                   | 66                   |      |
|                              |            |                           | Mean ±SD                  | 0.14±0.16            | 0.11±0.13            | 0.28 |
|                              |            |                           | Median [Q1, Q3]           | 0.07 [0.03, 0.21]    | 0.06 [0.03, 0.14]    | 0.50 |
|                              |            |                           | Min, Max                  | 0.00, 0.50           | 0.01, 0.50           |      |
|                              |            | 12 週                      | n                         | 60                   | 62                   |      |
|                              |            |                           | Mean ±SD                  | 0.14±0.15            | 0.13±0.14            | 0.57 |
|                              |            |                           | Median [Q1, Q3]           | 0.08 [0.04, 0.19]    | 0.08 [0.03, 0.15]    | 0.88 |
|                              |            |                           | Min, Max                  | 0.00, 0.50           | 0.01, 0.50           |      |
|                              |            | 24 週                      | n                         | 60                   | 59                   |      |
|                              |            |                           | Mean ±SD                  | 0.15±0.16            | 0.13±0.14            | 0.30 |
|                              |            |                           | Median [Q1, Q3]           | 0.09 [0.05, 0.20]    | 0.07 [0.04, 0.16]    | 0.23 |
|                              |            |                           | Min, Max                  | 0.01, 0.50           | 0.01, 0.50           |      |
|                              | 変化量        | 12 週                      | n                         | 59                   | 61                   |      |
|                              |            |                           | Mean ±SD                  | 0.00±0.17            | 0.02±0.15            | 0.50 |
|                              |            |                           | Median [Q1, Q3]           | 0.00 [-0.02, 0.05]   | 0.01 [-0.03, 0.05]   | 0.81 |
|                              |            |                           | Min, Max                  | -0.44, 0.39          | -0.36, 0.47          |      |
|                              |            |                           | One-sample t-test         | 0.98                 | 0.28                 |      |
|                              |            |                           | Wilcoxon signed-rank test | 0.47                 | 0.28                 |      |
|                              |            | 24 週                      | n                         | 59                   | 58                   |      |
|                              |            |                           | Mean ±SD                  | 0.03±0.16            | 0.01±0.13            | 0.51 |
|                              |            |                           | Median [Q1, Q3]           | 0.01 [-0.01, 0.07]   | 0.00 [-0.01, 0.03]   | 0.37 |
|                              |            |                           | Min, Max                  | -0.45, 0.49          | -0.37, 0.41          |      |
|                              |            |                           | One-sample t-test         | 0.17                 | 0.53                 |      |
|                              |            |                           | Wilcoxon signed-rank test | 0.028                | 0.17                 |      |
| 変化率                          | 12 週       | n                         | 59                        | 61                   |                      |      |
|                              |            | Mean ±SD                  | 115.3±477.3               | 105.4±290.0          | 0.89                 |      |
|                              |            | Median [Q1, Q3]           | 1.1 [-41.9, 110.2]        | 21.1 [-35.3, 111.8]  | 0.61                 |      |
|                              |            | Min, Max                  | -90.2, 3266.7             | -91.5, 1751.9        |                      |      |
|                              |            | One-sample t-test         | 0.07                      | 0.006                |                      |      |
|                              |            | Wilcoxon signed-rank test | 0.039                     | 0.008                |                      |      |
|                              | 24 週       | n                         | 59                        | 58                   |                      |      |
|                              |            | Mean ±SD                  | 167.5±560.2               | 54.9±127.8           | 0.14                 |      |
|                              |            | Median [Q1, Q3]           | 27.1 [-14.3, 140.7]       | 16.5 [-8.2, 87.2]    | 0.36                 |      |
|                              |            | Min, Max                  | -93.9, 4066.7             | -90.1, 497.8         |                      |      |
|                              |            | One-sample t-test         | 0.025                     | 0.002                |                      |      |
|                              |            | Wilcoxon signed-rank test | <0.001                    | 0.003                |                      |      |
| 対数変換<br>hsCRP(ln<br>(mg/dL)) | 測定値        | 0 週                       | n                         | 63                   | 66                   |      |
|                              |            |                           | Mean ±SD                  | -2.61±1.21           | -2.75±1.11           | 0.49 |
|                              |            |                           | Median [Q1, Q3]           | -2.62 [-3.61, -1.58] | -2.87 [-3.58, -1.97] | 0.50 |
|                              |            |                           | Min, Max                  | -5.52, -0.69         | -4.96, -0.69         |      |
|                              |            | 12 週                      | n                         | 60                   | 62                   |      |
|                              |            |                           | Mean ±SD                  | -2.53±1.16           | -2.57±1.05           | 0.86 |
|                              |            |                           | Median [Q1, Q3]           | -2.59 [-3.32, -1.68] | -2.52 [-3.41, -1.90] | 0.88 |
|                              |            |                           | Min, Max                  | -5.52, -0.69         | -4.83, -0.69         |      |
|                              |            | 24 週                      | n                         | 60                   | 59                   |      |
|                              |            |                           | Mean ±SD                  | -2.38±1.08           | -2.57±1.00           | 0.32 |

## 5. 副次評価項目

## 5.2. PPS

## 特殊血液検査

|                           |                   |                           |                           |                      |                     |             |      |
|---------------------------|-------------------|---------------------------|---------------------------|----------------------|---------------------|-------------|------|
|                           |                   | Median [Q1, Q3]           | -2.43 [-3.03, -1.63]      | -2.70 [-3.19, -1.83] | 0.23                |             |      |
|                           |                   | Min, Max                  | -5.12, -0.69              | -4.42, -0.69         |                     |             |      |
| 変化量                       | 12 週              | n                         | 59                        | 61                   |                     |             |      |
|                           |                   | Mean ±SD                  | 0.10 ± 1.01               | 0.20 ± 0.99          | 0.59                |             |      |
|                           |                   | Median [Q1, Q3]           | 0.01 [-0.54, 0.74]        | 0.19 [-0.44, 0.75]   | 0.61                |             |      |
|                           |                   | Min, Max                  | -2.32, 3.52               | -2.47, 2.92          |                     |             |      |
|                           |                   | One-sample t-test         | 0.45                      | 0.12                 |                     |             |      |
|                           |                   | Wilcoxon signed-rank test | 0.44                      | 0.11                 |                     |             |      |
|                           | 24 週              | n                         | 59                        | 58                   |                     |             |      |
|                           |                   | Mean ±SD                  | 0.33 ± 1.06               | 0.15 ± 0.80          | 0.31                |             |      |
|                           |                   | Median [Q1, Q3]           | 0.24 [-0.15, 0.88]        | 0.15 [-0.09, 0.63]   | 0.36                |             |      |
|                           |                   | Min, Max                  | -2.80, 3.73               | -2.31, 1.79          |                     |             |      |
|                           |                   | One-sample t-test         | 0.020                     | 0.15                 |                     |             |      |
|                           |                   | Wilcoxon signed-rank test | 0.009                     | 0.049                |                     |             |      |
|                           | 変化率               | 12 週                      | n                         | 59                   | 61                  |             |      |
|                           |                   |                           | Mean ±SD                  | 14.9 ± 75.4          | 3.5 ± 55.8          | 0.35        |      |
| Median [Q1, Q3]           |                   |                           | -0.4 [-26.2, 17.3]        | -6.7 [-24.0, 17.9]   | 0.71                |             |      |
| Min, Max                  |                   |                           | -79.5, 303.5              | -80.8, 236.2         |                     |             |      |
| One-sample t-test         |                   |                           | 0.13                      | 0.62                 |                     |             |      |
| Wilcoxon signed-rank test |                   |                           | 0.90                      | 0.48                 |                     |             |      |
| 24 週                      |                   | n                         | 59                        | 58                   |                     |             |      |
|                           |                   | Mean ±SD                  | 2.9 ± 74.1                | 4.4 ± 55.1           | 0.90                |             |      |
|                           |                   | Median [Q1, Q3]           | -8.2 [-28.5, 7.2]         | -4.9 [-17.9, 5.2]    | 0.37                |             |      |
|                           |                   | Min, Max                  | -84.3, 378.3              | -71.2, 263.2         |                     |             |      |
|                           |                   | One-sample t-test         | 0.77                      | 0.55                 |                     |             |      |
|                           |                   | Wilcoxon signed-rank test | 0.042                     | 0.16                 |                     |             |      |
| シスタチンC<br>(mg/L)          |                   | 測定値                       | 0 週                       | n                    | 64                  | 67          |      |
|                           |                   |                           |                           | Mean ±SD             | 1.19 ± 0.27         | 1.16 ± 0.33 | 0.64 |
|                           | Median [Q1, Q3]   |                           |                           | 1.18 [0.99, 1.35]    | 1.08 [0.92, 1.33]   | 0.39        |      |
|                           | Min, Max          |                           |                           | 0.70, 2.02           | 0.69, 2.08          |             |      |
|                           | 12 週              |                           | n                         | 61                   | 65                  |             |      |
|                           |                   |                           | Mean ±SD                  | 1.21 ± 0.31          | 1.16 ± 0.35         | 0.40        |      |
|                           |                   |                           | Median [Q1, Q3]           | 1.19 [1.00, 1.33]    | 1.12 [0.92, 1.30]   | 0.21        |      |
|                           |                   |                           | Min, Max                  | 0.70, 2.03           | 0.63, 2.41          |             |      |
|                           | 24 週              |                           | n                         | 61                   | 63                  |             |      |
|                           |                   |                           | Mean ±SD                  | 1.20 ± 0.32          | 1.20 ± 0.36         | 0.98        |      |
|                           |                   |                           | Median [Q1, Q3]           | 1.16 [0.98, 1.35]    | 1.14 [0.97, 1.36]   | 0.76        |      |
|                           |                   |                           | Min, Max                  | 0.73, 2.26           | 0.70, 2.32          |             |      |
|                           | 変化量               | 12 週                      | n                         | 61                   | 65                  |             |      |
|                           |                   |                           | Mean ±SD                  | 0.04 ± 0.15          | 0.01 ± 0.16         | 0.25        |      |
|                           |                   |                           | Median [Q1, Q3]           | 0.03 [-0.02, 0.08]   | -0.01 [-0.06, 0.07] | 0.19        |      |
|                           |                   |                           | Min, Max                  | -0.28, 0.55          | -0.60, 0.49         |             |      |
|                           |                   |                           | One-sample t-test         | 0.043                | 0.68                |             |      |
|                           |                   |                           | Wilcoxon signed-rank test | 0.034                | 0.72                |             |      |
|                           |                   | 24 週                      | n                         | 61                   | 63                  |             |      |
|                           |                   |                           | Mean ±SD                  | 0.04 ± 0.18          | 0.04 ± 0.12         | 0.93        |      |
|                           | Median [Q1, Q3]   | 0.03 [-0.03, 0.09]        | 0.04 [-0.03, 0.12]        | 0.50                 |                     |             |      |
|                           | Min, Max          | -0.32, 0.65               | -0.38, 0.33               |                      |                     |             |      |
|                           | One-sample t-test | 0.11                      | 0.013                     |                      |                     |             |      |



## 5. 副次評価項目

## 5.2. PPS

## 特殊血液検査

|                  |      |                           |                           |                    |                    |      |
|------------------|------|---------------------------|---------------------------|--------------------|--------------------|------|
|                  |      | Wilcoxon signed-rank test | 0.08                      | 0.005              |                    |      |
| 変化率              | 12 週 | n                         | 61                        | 65                 |                    |      |
|                  |      | Mean ±SD                  | 3.4 ± 11.0                | 1.0 ± 12.3         | 0.26               |      |
|                  |      | Median [Q1, Q3]           | 2.8 [-1.7, 7.4]           | -0.9 [-5.2, 7.6]   | 0.20               |      |
|                  |      | Min, Max                  | -16.0, 37.2               | -42.3, 41.4        |                    |      |
|                  |      | One-sample t-test         | 0.020                     | 0.50               |                    |      |
|                  |      | Wilcoxon signed-rank test | 0.025                     | 0.65               |                    |      |
|                  | 24 週 | n                         | 61                        | 63                 |                    |      |
|                  |      | Mean ±SD                  | 3.0 ± 12.9                | 3.4 ± 10.0         | 0.86               |      |
|                  |      | Median [Q1, Q3]           | 3.3 [-2.8, 9.1]           | 4.6 [-3.0, 12.1]   | 0.53               |      |
|                  |      | Min, Max                  | -27.0, 40.4               | -24.5, 20.9        |                    |      |
|                  |      | One-sample t-test         | 0.07                      | 0.009              |                    |      |
|                  |      | Wilcoxon signed-rank test | 0.06                      | 0.006              |                    |      |
| MDA-LDL<br>(U/L) | 測定値  | 0 週                       | n                         | 64                 | 67                 |      |
|                  |      |                           | Mean ±SD                  | 93.9 ± 31.3        | 95.6 ± 28.5        | 0.74 |
|                  |      |                           | Median [Q1, Q3]           | 96.0 [70.5, 112.5] | 95.0 [71.0, 114.0] | 0.84 |
|                  |      |                           | Min, Max                  | 30.0, 167.0        | 51.0, 170.0        |      |
|                  |      | 12 週                      | n                         | 61                 | 65                 |      |
|                  |      |                           | Mean ±SD                  | 89.9 ± 34.9        | 86.0 ± 27.0        | 0.48 |
|                  |      |                           | Median [Q1, Q3]           | 82.0 [67.0, 108.0] | 80.0 [68.0, 101.0] | 0.77 |
|                  |      |                           | Min, Max                  | 30.0, 188.0        | 31.0, 182.0        |      |
|                  |      | 24 週                      | n                         | 61                 | 63                 |      |
|                  |      |                           | Mean ±SD                  | 90.8 ± 33.2        | 85.6 ± 30.6        | 0.37 |
|                  |      |                           | Median [Q1, Q3]           | 87.0 [69.0, 104.0] | 79.0 [63.0, 101.0] | 0.29 |
|                  |      |                           | Min, Max                  | 36.0, 196.0        | 35.0, 190.0        |      |
|                  | 変化量  | 12 週                      | n                         | 61                 | 65                 |      |
|                  |      |                           | Mean ±SD                  | -3.9 ± 26.2        | -10.1 ± 25.2       | 0.18 |
|                  |      |                           | Median [Q1, Q3]           | -7.0 [-20.0, 8.0]  | -5.0 [-28.0, 6.0]  | 0.32 |
|                  |      |                           | Min, Max                  | -61.0, 74.0        | -62.0, 46.0        |      |
|                  |      |                           | One-sample t-test         | 0.25               | 0.002              |      |
|                  |      |                           | Wilcoxon signed-rank test | 0.09               | 0.004              |      |
|                  |      | 24 週                      | n                         | 61                 | 63                 |      |
|                  |      |                           | Mean ±SD                  | -3.0 ± 26.4        | -9.2 ± 21.6        | 0.15 |
|                  |      |                           | Median [Q1, Q3]           | -4.0 [-19.0, 16.0] | -8.0 [-24.0, 2.0]  | 0.13 |
|                  |      |                           | Min, Max                  | -71.0, 54.0        | -70.0, 37.0        |      |
|                  |      |                           | One-sample t-test         | 0.38               | 0.001              |      |
|                  |      |                           | Wilcoxon signed-rank test | 0.62               | <0.001             |      |
| 変化率              | 12 週 | n                         | 61                        | 65                 |                    |      |
|                  |      | Mean ±SD                  | -0.8 ± 30.5               | -7.3 ± 26.0        | 0.20               |      |
|                  |      | Median [Q1, Q3]           | -6.4 [-20.9, 11.1]        | -6.0 [-27.5, 7.5]  | 0.32               |      |
|                  |      | Min, Max                  | -46.2, 119.5              | -47.5, 54.9        |                    |      |
|                  |      | One-sample t-test         | 0.84                      | 0.027              |                    |      |
|                  |      | Wilcoxon signed-rank test | 0.21                      | 0.019              |                    |      |
|                  | 24 週 | n                         | 61                        | 63                 |                    |      |
|                  |      | Mean ±SD                  | 1.5 ± 32.1                | -8.2 ± 21.2        | 0.047              |      |
|                  |      | Median [Q1, Q3]           | -3.6 [-21.6, 20.0]        | -7.5 [-20.0, 3.1]  | 0.11               |      |
|                  |      | Min, Max                  | -48.3, 131.7              | -56.5, 50.0        |                    |      |
|                  |      | One-sample t-test         | 0.71                      | 0.003              |                    |      |
|                  |      | Wilcoxon signed-rank test | 0.92                      | 0.001              |                    |      |

## 5. 副次評価項目

## 5.2. PPS

## 特殊血液検査

|                                              |     |      |                           |                      |                      |      |
|----------------------------------------------|-----|------|---------------------------|----------------------|----------------------|------|
| XOR 活性<br>(pmol/h/mL<br>plasma)              | 測定値 | 0 週  | n                         | 64                   | 67                   |      |
|                                              |     |      | Mean ±SD                  | 57.9±55.0            | 67.6±128.1           | 0.57 |
|                                              |     |      | Median [Q1, Q3]           | 40.5 [26.1, 68.1]    | 29.4 [17.8, 57.5]    | 0.08 |
|                                              |     |      | Min, Max                  | 8.0, 342.0           | 6.7, 946.0           |      |
|                                              |     | 24 週 | n                         | 61                   | 63                   |      |
|                                              |     |      | Mean ±SD                  | 23.4±34.5            | 24.9±34.7            | 0.80 |
|                                              |     |      | Median [Q1, Q3]           | 11.8 [6.7, 27.4]     | 12.6 [6.8, 23.9]     | 0.70 |
|                                              |     |      | Min, Max                  | 6.7, 250.0           | 6.7, 210.0           |      |
|                                              | 変化量 | 24 週 | n                         | 61                   | 63                   |      |
|                                              |     |      | Mean ±SD                  | -34.9±58.9           | -43.0±114.7          | 0.62 |
|                                              |     |      | Median [Q1, Q3]           | -21.9 [-44.3, -11.7] | -18.3 [-32.2, -8.2]  | 0.27 |
|                                              |     |      | Min, Max                  | -334.9, 182.2        | -868.1, 65.0         |      |
|                                              |     |      | One-sample t-test         | <0.001               | 0.004                |      |
|                                              |     |      | Wilcoxon signed-rank test | <0.001               | <0.001               |      |
|                                              | 変化率 | 24 週 | n                         | 61                   | 63                   |      |
|                                              |     |      | Mean ±SD                  | -50.8±54.2           | -46.4±40.9           | 0.61 |
|                                              |     |      | Median [Q1, Q3]           | -66.5 [-78.8, -50.6] | -55.7 [-73.4, -36.4] | 0.06 |
|                                              |     |      | Min, Max                  | -97.9, 268.7         | -91.8, 130.0         |      |
|                                              |     |      | One-sample t-test         | <0.001               | <0.001               |      |
| Wilcoxon signed-rank test                    |     |      | <0.001                    | <0.001               |                      |      |
| 対数変換 XOR<br>活性 (ln<br>(pmol/h/mL<br>plasma)) | 測定値 | 0 週  | n                         | 64                   | 67                   |      |
|                                              |     |      | Mean ±SD                  | 3.8±0.7              | 3.6±1.0              | 0.19 |
|                                              |     |      | Median [Q1, Q3]           | 3.7 [3.3, 4.2]       | 3.4 [2.9, 4.1]       | 0.08 |
|                                              |     |      | Min, Max                  | 2.1, 5.8             | 1.9, 6.9             |      |
|                                              |     | 24 週 | n                         | 61                   | 63                   |      |
|                                              |     |      | Mean ±SD                  | 2.7±0.8              | 2.7±0.9              | 0.75 |
|                                              |     |      | Median [Q1, Q3]           | 2.5 [1.9, 3.3]       | 2.5 [1.9, 3.2]       | 0.70 |
|                                              |     |      | Min, Max                  | 1.9, 5.5             | 1.9, 5.3             |      |
|                                              | 変化量 | 24 週 | n                         | 61                   | 63                   |      |
|                                              |     |      | Mean ±SD                  | -1.1±0.8             | -0.8±0.7             | 0.10 |
|                                              |     |      | Median [Q1, Q3]           | -1.1 [-1.5, -0.7]    | -0.8 [-1.3, -0.5]    | 0.06 |
|                                              |     |      | Min, Max                  | -3.9, 1.3            | -2.5, 0.8            |      |
|                                              |     |      | One-sample t-test         | <0.001               | <0.001               |      |
|                                              |     |      | Wilcoxon signed-rank test | <0.001               | <0.001               |      |
|                                              | 変化率 | 24 週 | n                         | 61                   | 63                   |      |
|                                              |     |      | Mean ±SD                  | -27.5±20.2           | -22.4±17.1           | 0.13 |
|                                              |     |      | Median [Q1, Q3]           | -31.3 [-43.6, -17.2] | -23.7 [-34.5, -13.1] | 0.07 |
|                                              |     |      | Min, Max                  | -66.3, 30.9          | -55.8, 26.6          |      |
|                                              |     |      | One-sample t-test         | <0.001               | <0.001               |      |
| Wilcoxon signed-rank test                    |     |      | <0.001                    | <0.001               |                      |      |

## 5. 副次評価項目

## 5.2. PPS

## 特殊尿検査

表 5.2.11. [PPS] 特殊尿検査

| 変数                        | 観察ポイント | 統計量                       | トピロキソスタット群                | アロプリノール群          | 群間比較 P 値        |        |
|---------------------------|--------|---------------------------|---------------------------|-------------------|-----------------|--------|
| 8-OHdG<br>(ng/mg・Cr)      | 測定値    | 0 週                       | n                         | 64                | 67              |        |
|                           |        |                           | Mean ± SD                 | 7.8 ± 3.6         | 7.3 ± 4.0       | 0.46   |
|                           |        |                           | Median [Q1, Q3]           | 7.3 [5.4, 9.4]    | 6.7 [4.8, 9.0]  | 0.25   |
|                           |        |                           | Min, Max                  | 2.9, 22.3         | 2.1, 27.8       |        |
|                           |        | 12 週                      | n                         | 61                | 65              |        |
|                           |        |                           | Mean ± SD                 | 8.9 ± 3.8         | 10.2 ± 5.5      | 0.13   |
|                           |        |                           | Median [Q1, Q3]           | 8.1 [6.5, 10.2]   | 9.1 [7.0, 11.5] | 0.13   |
|                           |        |                           | Min, Max                  | 3.6, 20.7         | 4.3, 37.9       |        |
|                           |        | 24 週                      | n                         | 61                | 63              |        |
|                           |        |                           | Mean ± SD                 | 8.5 ± 4.2         | 10.3 ± 4.6      | 0.028  |
|                           |        |                           | Median [Q1, Q3]           | 8.0 [5.7, 9.6]    | 9.4 [7.6, 12.0] | 0.006  |
|                           |        |                           | Min, Max                  | 1.5, 24.9         | 3.6, 29.0       |        |
|                           | 変化量    | 12 週                      | n                         | 61                | 65              |        |
|                           |        |                           | Mean ± SD                 | 1.0 ± 3.4         | 2.8 ± 4.6       | 0.012  |
|                           |        |                           | Median [Q1, Q3]           | 1.0 [-0.5, 2.4]   | 2.6 [0.3, 4.6]  | 0.002  |
|                           |        |                           | Min, Max                  | -7.4, 12.7        | -10.1, 27.3     |        |
|                           |        |                           | One-sample t-test         | 0.034             | <0.001          |        |
|                           |        |                           | Wilcoxon signed-rank test | 0.008             | <0.001          |        |
|                           |        | 24 週                      | n                         | 61                | 63              |        |
|                           |        |                           | Mean ± SD                 | 0.8 ± 3.7         | 3.1 ± 3.1       | <0.001 |
|                           |        |                           | Median [Q1, Q3]           | 0.9 [-1.2, 2.3]   | 3.0 [1.1, 5.0]  | <0.001 |
|                           |        |                           | Min, Max                  | -9.9, 11.9        | -2.3, 10.6      |        |
|                           |        |                           | One-sample t-test         | 0.09              | <0.001          |        |
|                           |        |                           | Wilcoxon signed-rank test | 0.049             | <0.001          |        |
| 変化率                       | 12 週   | n                         | 61                        | 65                |                 |        |
|                           |        | Mean ± SD                 | 21.3 ± 44.5               | 53.3 ± 66.2       | 0.002           |        |
|                           |        | Median [Q1, Q3]           | 15.1 [-5.7, 39.6]         | 45.8 [5.6, 79.3]  | 0.003           |        |
|                           |        | Min, Max                  | -61.7, 158.8              | -43.0, 275.0      |                 |        |
|                           |        | One-sample t-test         | <0.001                    | <0.001            |                 |        |
|                           |        | Wilcoxon signed-rank test | <0.001                    | <0.001            |                 |        |
|                           | 24 週   | n                         | 61                        | 63                |                 |        |
|                           |        | Mean ± SD                 | 19.5 ± 52.5               | 60.6 ± 67.3       | <0.001          |        |
|                           |        | Median [Q1, Q3]           | 13.2 [-16.4, 39.0]        | 41.9 [12.7, 97.3] | <0.001          |        |
|                           |        | Min, Max                  | -83.0, 197.6              | -25.0, 296.4      |                 |        |
|                           |        | One-sample t-test         | 0.005                     | <0.001            |                 |        |
|                           |        | Wilcoxon signed-rank test | 0.009                     | <0.001            |                 |        |
| 尿中 L-FABP<br>(濃度) (ng/mL) | 測定値    | 0 週                       | n                         | 64                | 67              |        |
|                           |        |                           | Mean ± SD                 | 4.0 ± 4.1         | 5.2 ± 7.1       | 0.26   |
|                           |        |                           | Median [Q1, Q3]           | 2.3 [1.6, 3.9]    | 2.3 [1.6, 5.5]  | 0.55   |
|                           |        |                           | Min, Max                  | 1.5, 21.5         | 1.5, 36.3       |        |
|                           |        | 12 週                      | n                         | 61                | 65              |        |
|                           |        |                           | Mean ± SD                 | 3.5 ± 3.2         | 4.9 ± 7.6       | 0.18   |
|                           |        |                           | Median [Q1, Q3]           | 2.0 [1.5, 3.7]    | 2.2 [1.5, 5.0]  | 0.28   |
|                           |        |                           | Min, Max                  | 1.5, 12.8         | 1.5, 48.8       |        |
|                           |        | 24 週                      | n                         | 61                | 63              |        |
|                           |        |                           | Mean ± SD                 | 4.0 ± 5.0         | 5.4 ± 8.3       | 0.27   |

## 5. 副次評価項目

## 5.2. PPS

## 特殊尿検査

|                                       |                   |                           |                           |                    |                    |           |      |
|---------------------------------------|-------------------|---------------------------|---------------------------|--------------------|--------------------|-----------|------|
|                                       |                   | Median [Q1, Q3]           | 2.4 [1.5, 4.1]            | 2.0 [1.5, 6.7]     | 0.97               |           |      |
|                                       |                   | Min, Max                  | 1.5, 33.3                 | 1.5, 51.8          |                    |           |      |
| 変化量                                   | 12 週              | n                         | 61                        | 65                 |                    |           |      |
|                                       |                   | Mean ±SD                  | -0.5±3.7                  | 0.3±7.1            | 0.46               |           |      |
|                                       |                   | Median [Q1, Q3]           | 0.0 [-0.8, 0.5]           | 0.0 [-0.6, 0.9]    | 0.62               |           |      |
|                                       |                   | Min, Max                  | -13.4, 10.5               | -26.5, 32.6        |                    |           |      |
|                                       |                   | One-sample t-test         | 0.32                      | 0.76               |                    |           |      |
|                                       |                   | Wilcoxon signed-rank test | 0.55                      | 0.90               |                    |           |      |
|                                       | 24 週              | n                         | 61                        | 63                 |                    |           |      |
|                                       |                   | Mean ±SD                  | 0.4±4.3                   | 0.3±7.2            | 0.94               |           |      |
|                                       |                   | Median [Q1, Q3]           | 0.0 [-0.6, 1.1]           | 0.0 [-0.9, 0.9]    | 0.73               |           |      |
|                                       |                   | Min, Max                  | -9.8, 21.9                | -28.3, 33.4        |                    |           |      |
|                                       |                   | One-sample t-test         | 0.44                      | 0.70               |                    |           |      |
|                                       |                   | Wilcoxon signed-rank test | 0.51                      | 0.83               |                    |           |      |
|                                       | 変化率               | 12 週                      | n                         | 61                 | 65                 |           |      |
|                                       |                   |                           | Mean ±SD                  | 17.5±99.7          | 32.1±119.2         | 0.46      |      |
| Median [Q1, Q3]                       |                   |                           | 0.0 [-25.2, 33.3]         | 0.0 [-23.1, 40.7]  | 0.56               |           |      |
| Min, Max                              |                   |                           | -89.9, 552.6              | -85.1, 581.3       |                    |           |      |
| One-sample t-test                     |                   |                           | 0.18                      | 0.033              |                    |           |      |
| Wilcoxon signed-rank test             |                   |                           | 0.80                      | 0.31               |                    |           |      |
| 24 週                                  |                   | n                         | 61                        | 63                 |                    |           |      |
|                                       |                   | Mean ±SD                  | 31.7±103.6                | 54.0±255.4         | 0.53               |           |      |
|                                       |                   | Median [Q1, Q3]           | 0.0 [-20.8, 51.5]         | 0.0 [-30.9, 40.0]  | 0.57               |           |      |
|                                       |                   | Min, Max                  | -81.9, 416.7              | -85.2, 1855.6      |                    |           |      |
|                                       |                   | One-sample t-test         | 0.020                     | 0.10               |                    |           |      |
|                                       |                   | Wilcoxon signed-rank test | 0.16                      | 0.51               |                    |           |      |
| 対数変換 尿中<br>L-FABP(濃度)<br>(ln (ng/mL)) |                   | 測定値                       | 0 週                       | n                  | 64                 | 67        |      |
|                                       |                   |                           |                           | Mean ±SD           | 1.06±0.74          | 1.17±0.86 | 0.45 |
|                                       | Median [Q1, Q3]   |                           |                           | 0.83 [0.44, 1.36]  | 0.83 [0.47, 1.70]  | 0.55      |      |
|                                       | Min, Max          |                           |                           | 0.41, 3.07         | 0.41, 3.59         |           |      |
|                                       | 12 週              |                           | n                         | 61                 | 65                 |           |      |
|                                       |                   |                           | Mean ±SD                  | 0.96±0.70          | 1.11±0.83          | 0.26      |      |
|                                       |                   |                           | Median [Q1, Q3]           | 0.69 [0.41, 1.31]  | 0.79 [0.41, 1.61]  | 0.28      |      |
|                                       |                   |                           | Min, Max                  | 0.41, 2.55         | 0.41, 3.89         |           |      |
|                                       | 24 週              |                           | n                         | 61                 | 63                 |           |      |
|                                       |                   |                           | Mean ±SD                  | 1.05±0.71          | 1.15±0.90          | 0.52      |      |
|                                       |                   |                           | Median [Q1, Q3]           | 0.88 [0.41, 1.41]  | 0.69 [0.41, 1.90]  | 0.97      |      |
|                                       |                   |                           | Min, Max                  | 0.41, 3.51         | 0.41, 3.95         |           |      |
|                                       | 変化量               | 12 週                      | n                         | 61                 | 65                 |           |      |
|                                       |                   |                           | Mean ±SD                  | -0.08±0.71         | 0.01±0.74          | 0.53      |      |
|                                       |                   |                           | Median [Q1, Q3]           | 0.00 [-0.29, 0.29] | 0.00 [-0.26, 0.34] | 0.56      |      |
|                                       |                   |                           | Min, Max                  | -2.30, 1.88        | -1.91, 1.92        |           |      |
|                                       |                   |                           | One-sample t-test         | 0.41               | 0.95               |           |      |
|                                       |                   |                           | Wilcoxon signed-rank test | 0.59               | 0.83               |           |      |
|                                       |                   | 24 週                      | n                         | 61                 | 63                 |           |      |
|                                       |                   |                           | Mean ±SD                  | 0.05±0.67          | 0.02±0.80          | 0.79      |      |
|                                       | Median [Q1, Q3]   | 0.00 [-0.23, 0.42]        | 0.00 [-0.37, 0.34]        | 0.57               |                    |           |      |
|                                       | Min, Max          | -1.71, 1.64               | -1.91, 2.97               |                    |                    |           |      |
|                                       | One-sample t-test | 0.54                      | 0.87                      |                    |                    |           |      |

## 5. 副次評価項目

## 5.2. PPS

## 特殊尿検査

|                                                             |      |                           |                           |                    |                 |      |
|-------------------------------------------------------------|------|---------------------------|---------------------------|--------------------|-----------------|------|
|                                                             |      | Wilcoxon signed-rank test | 0.47                      | 0.88               |                 |      |
| 変化率                                                         | 12 週 | n                         | 61                        | 65                 |                 |      |
|                                                             |      | Mean ± SD                 | 12.2 ± 75.9               | 19.4 ± 74.7        | 0.59            |      |
|                                                             |      | Median [Q1, Q3]           | 0.0 [-31.0, 39.8]         | 0.0 [-24.9, 47.5]  | 0.54            |      |
|                                                             |      | Min, Max                  | -85.0, 339.8              | -82.5, 260.0       |                 |      |
|                                                             |      | One-sample t-test         | 0.21                      | 0.041              |                 |      |
|                                                             |      | Wilcoxon signed-rank test | 0.61                      | 0.22               |                 |      |
|                                                             | 24 週 | n                         | 61                        | 63                 |                 |      |
|                                                             |      | Mean ± SD                 | 28.6 ± 91.2               | 24.1 ± 105.9       | 0.80            |      |
|                                                             |      | Median [Q1, Q3]           | 0.0 [-23.6, 45.0]         | 0.0 [-29.6, 36.4]  | 0.48            |      |
|                                                             |      | Min, Max                  | -80.8, 396.9              | -82.5, 505.8       |                 |      |
|                                                             |      | One-sample t-test         | 0.017                     | 0.08               |                 |      |
|                                                             |      | Wilcoxon signed-rank test | 0.15                      | 0.62               |                 |      |
| 尿中 L-FABP<br>(Cre 補正值)<br>( $\mu\text{g/g}\cdot\text{Cr}$ ) | 0 週  | n                         | 64                        | 67                 |                 |      |
|                                                             |      | Mean ± SD                 | 5.1 ± 5.0                 | 5.2 ± 6.1          | 0.95            |      |
|                                                             |      | Median [Q1, Q3]           | 3.3 [2.0, 6.1]            | 3.3 [1.9, 5.7]     | 0.87            |      |
|                                                             |      | Min, Max                  | 0.8, 25.1                 | 0.8, 33.4          |                 |      |
|                                                             | 12 週 | n                         | 61                        | 65                 |                 |      |
|                                                             |      | Mean ± SD                 | 4.7 ± 5.8                 | 6.1 ± 7.3          | 0.24            |      |
|                                                             |      | Median [Q1, Q3]           | 2.7 [2.0, 4.8]            | 3.6 [2.3, 7.1]     | 0.043           |      |
|                                                             |      | Min, Max                  | 0.6, 39.1                 | 1.2, 47.2          |                 |      |
|                                                             | 24 週 | n                         | 61                        | 63                 |                 |      |
|                                                             |      | Mean ± SD                 | 5.9 ± 9.6                 | 6.6 ± 7.1          | 0.64            |      |
|                                                             |      | Median [Q1, Q3]           | 3.0 [2.1, 5.5]            | 3.5 [2.2, 9.0]     | 0.18            |      |
|                                                             |      | Min, Max                  | 0.8, 55.7                 | 0.9, 37.5          |                 |      |
|                                                             | 変化量  | 12 週                      | n                         | 61                 | 65              |      |
|                                                             |      |                           | Mean ± SD                 | -0.2 ± 5.1         | 1.2 ± 4.2       | 0.09 |
|                                                             |      |                           | Median [Q1, Q3]           | 0.0 [-0.7, 0.8]    | 0.4 [-0.7, 2.1] | 0.08 |
|                                                             |      |                           | Min, Max                  | -17.7, 20.5        | -8.7, 18.8      |      |
|                                                             |      |                           | One-sample t-test         | 0.78               | 0.022           |      |
|                                                             |      |                           | Wilcoxon signed-rank test | 0.78               | 0.034           |      |
|                                                             |      | 24 週                      | n                         | 61                 | 63              |      |
|                                                             |      |                           | Mean ± SD                 | 1.2 ± 8.0          | 1.3 ± 5.6       | 0.91 |
|                                                             |      |                           | Median [Q1, Q3]           | -0.1 [-1.3, 1.0]   | 0.4 [-1.0, 2.3] | 0.32 |
|                                                             |      |                           | Min, Max                  | -16.7, 38.0        | -15.8, 29.6     |      |
|                                                             |      |                           | One-sample t-test         | 0.25               | 0.07            |      |
|                                                             |      |                           | Wilcoxon signed-rank test | 0.92               | 0.10            |      |
| 変化率                                                         | 12 週 | n                         | 61                        | 65                 |                 |      |
|                                                             |      | Mean ± SD                 | 12.2 ± 82.4               | 47.1 ± 108.5       | 0.045           |      |
|                                                             |      | Median [Q1, Q3]           | 0.0 [-24.6, 20.0]         | 10.0 [-19.3, 69.2] | 0.05            |      |
|                                                             |      | Min, Max                  | -84.7, 490.0              | -65.8, 494.7       |                 |      |
|                                                             |      | One-sample t-test         | 0.25                      | <0.001             |                 |      |
|                                                             |      | Wilcoxon signed-rank test | 0.88                      | 0.002              |                 |      |
|                                                             | 24 週 | n                         | 61                        | 63                 |                 |      |
|                                                             |      | Mean ± SD                 | 35.8 ± 138.1              | 75.3 ± 236.4       | 0.26            |      |
|                                                             |      | Median [Q1, Q3]           | -5.3 [-32.7, 50.0]        | 12.9 [-18.2, 77.8] | 0.19            |      |
|                                                             |      | Min, Max                  | -79.9, 866.7              | -77.4, 1418.2      |                 |      |
|                                                             |      | One-sample t-test         | 0.048                     | 0.014              |                 |      |
|                                                             |      | Wilcoxon signed-rank test | 0.36                      | 0.004              |                 |      |

## 5. 副次評価項目

## 5.2. PPS

## 特殊尿検査

|                                                                |      |                           |                           |                     |                    |       |
|----------------------------------------------------------------|------|---------------------------|---------------------------|---------------------|--------------------|-------|
| 対数変換 尿中<br>L-FABP(Cre 補<br>正值) (ln<br>( $\mu$ g/g $\cdot$ Cr)) | 測定値  | 0 週                       | n                         | 64                  | 67                 |       |
|                                                                |      |                           | Mean $\pm$ SD             | 1.29 $\pm$ 0.81     | 1.27 $\pm$ 0.81    | 0.92  |
|                                                                |      |                           | Median [Q1, Q3]           | 1.19 [0.67, 1.80]   | 1.19 [0.64, 1.74]  | 0.87  |
|                                                                |      |                           | Min, Max                  | -0.22, 3.22         | -0.22, 3.51        |       |
|                                                                |      | 12 週                      | n                         | 61                  | 65                 |       |
|                                                                |      |                           | Mean $\pm$ SD             | 1.16 $\pm$ 0.79     | 1.42 $\pm$ 0.80    | 0.07  |
|                                                                |      |                           | Median [Q1, Q3]           | 0.99 [0.69, 1.57]   | 1.28 [0.83, 1.96]  | 0.043 |
|                                                                |      |                           | Min, Max                  | -0.51, 3.67         | 0.18, 3.85         |       |
|                                                                |      | 24 週                      | n                         | 61                  | 63                 |       |
|                                                                |      |                           | Mean $\pm$ SD             | 1.26 $\pm$ 0.88     | 1.47 $\pm$ 0.88    | 0.18  |
|                                                                |      |                           | Median [Q1, Q3]           | 1.10 [0.74, 1.70]   | 1.25 [0.79, 2.20]  | 0.18  |
|                                                                |      |                           | Min, Max                  | -0.22, 4.02         | -0.11, 3.62        |       |
|                                                                | 変化量  | 12 週                      | n                         | 61                  | 65                 |       |
|                                                                |      |                           | Mean $\pm$ SD             | -0.09 $\pm$ 0.66    | 0.19 $\pm$ 0.60    | 0.016 |
|                                                                |      |                           | Median [Q1, Q3]           | 0.00 [-0.28, 0.18]  | 0.10 [-0.21, 0.53] | 0.05  |
|                                                                |      |                           | Min, Max                  | -1.88, 1.77         | -1.07, 1.78        |       |
|                                                                |      |                           | One-sample t-test         | 0.32                | 0.013              |       |
|                                                                |      |                           | Wilcoxon signed-rank test | 0.67                | 0.019              |       |
|                                                                |      | 24 週                      | n                         | 61                  | 63                 |       |
|                                                                |      |                           | Mean $\pm$ SD             | 0.03 $\pm$ 0.71     | 0.20 $\pm$ 0.76    | 0.21  |
|                                                                |      |                           | Median [Q1, Q3]           | -0.05 [-0.40, 0.41] | 0.12 [-0.20, 0.58] | 0.19  |
|                                                                |      |                           | Min, Max                  | -1.60, 2.27         | -1.49, 2.72        |       |
|                                                                |      |                           | One-sample t-test         | 0.75                | 0.044              |       |
|                                                                |      |                           | Wilcoxon signed-rank test | 0.98                | 0.07               |       |
| 変化率                                                            | 12 週 | n                         | 61                        | 65                  |                    |       |
|                                                                |      | Mean $\pm$ SD             | 32.2 $\pm$ 153.1          | 64.1 $\pm$ 256.1    | 0.40               |       |
|                                                                |      | Median [Q1, Q3]           | 0.0 [-24.0, 25.4]         | 7.5 [-17.9, 49.4]   | 0.21               |       |
|                                                                |      | Min, Max                  | -84.7, 902.5              | -349.0, 1454.5      |                    |       |
|                                                                |      | One-sample t-test         | 0.11                      | 0.048               |                    |       |
|                                                                |      | Wilcoxon signed-rank test | 0.85                      | 0.06                |                    |       |
|                                                                | 24 週 | n                         | 61                        | 63                  |                    |       |
|                                                                |      | Mean $\pm$ SD             | 35.0 $\pm$ 185.9          | 49.1 $\pm$ 455.6    | 0.82               |       |
|                                                                |      | Median [Q1, Q3]           | -5.0 [-30.4, 43.3]        | 4.6 [-23.2, 49.4]   | 0.40               |       |
|                                                                |      | Min, Max                  | -181.7, 1244.3            | -1173.8, 2853.9     |                    |       |
|                                                                |      | One-sample t-test         | 0.15                      | 0.40                |                    |       |
|                                                                |      | Wilcoxon signed-rank test | 0.76                      | 0.14                |                    |       |
| 尿中アルブミン<br>(アルブミン) ( $\mu$<br>g/mL)                            | 測定値  | 0 週                       | n                         | 64                  | 67                 |       |
|                                                                |      |                           | Mean $\pm$ SD             | 101.4 $\pm$ 256.1   | 172.2 $\pm$ 675.3  | 0.43  |
|                                                                |      |                           | Median [Q1, Q3]           | 12.9 [5.3, 48.7]    | 18.9 [6.2, 67.2]   | 0.28  |
|                                                                |      |                           | Min, Max                  | 0.5, 1402.6         | 0.6, 4566.9        |       |
|                                                                |      | 12 週                      | n                         | 61                  | 66                 |       |
|                                                                |      |                           | Mean $\pm$ SD             | 92.2 $\pm$ 329.3    | 117.7 $\pm$ 278.1  | 0.64  |
|                                                                |      |                           | Median [Q1, Q3]           | 8.9 [4.4, 35.9]     | 17.9 [6.4, 55.8]   | 0.10  |
|                                                                |      |                           | Min, Max                  | 0.5, 2209.6         | 0.6, 1628.5        |       |
|                                                                |      | 24 週                      | n                         | 61                  | 63                 |       |
|                                                                |      |                           | Mean $\pm$ SD             | 54.1 $\pm$ 143.8    | 151.5 $\pm$ 712.2  | 0.30  |
|                                                                |      |                           | Median [Q1, Q3]           | 12.2 [5.6, 31.6]    | 16.5 [4.3, 40.8]   | 0.50  |
|                                                                |      |                           | Min, Max                  | 0.7, 1024.8         | 0.8, 5627.4        |       |
|                                                                | 変化量  | 12 週                      | n                         | 61                  | 66                 |       |

## 5. 副次評価項目

## 5.2. PPS

## 特殊尿検査

|                                                   |      |           |                           |                     |                      |      |
|---------------------------------------------------|------|-----------|---------------------------|---------------------|----------------------|------|
|                                                   |      |           | Mean ± SD                 | -11.9 ± 284.3       | -55.9 ± 615.3        | 0.61 |
|                                                   |      |           | Median [Q1, Q3]           | -1.3 [-6.2, 1.7]    | -2.7 [-14.1, 7.8]    | 0.91 |
|                                                   |      |           | Min, Max                  | -1102.5, 1630.7     | -4135.9, 1401.0      |      |
|                                                   |      |           | One-sample t-test         | 0.74                | 0.46                 |      |
|                                                   |      |           | Wilcoxon signed-rank test | 0.19                | 0.35                 |      |
|                                                   |      | 24 週      | n                         | 61                  | 63                   |      |
|                                                   |      |           | Mean ± SD                 | -40.4 ± 217.0       | -26.3 ± 635.8        | 0.87 |
|                                                   |      |           | Median [Q1, Q3]           | 0.0 [-8.6, 5.6]     | -1.9 [-11.1, 5.3]    | 0.82 |
|                                                   |      |           | Min, Max                  | -1079.0, 445.9      | -4202.7, 2500.1      |      |
|                                                   |      |           | One-sample t-test         | 0.15                | 0.74                 |      |
|                                                   | 変化率  | 12 週      | n                         | 61                  | 66                   |      |
|                                                   |      |           | Mean ± SD                 | 40.2 ± 224.5        | 112.0 ± 370.8        | 0.19 |
|                                                   |      |           | Median [Q1, Q3]           | -14.0 [-43.4, 45.5] | -14.5 [-66.0, 105.3] | 0.64 |
|                                                   |      |           | Min, Max                  | -99.4, 1565.5       | -95.7, 2425.0        |      |
|                                                   |      |           | One-sample t-test         | 0.17                | 0.017                |      |
|                                                   |      | 24 週      | n                         | 61                  | 63                   |      |
|                                                   |      |           | Mean ± SD                 | 69.2 ± 238.2        | 76.0 ± 274.3         | 0.88 |
|                                                   |      |           | Median [Q1, Q3]           | 0.0 [-50.0, 56.6]   | -14.1 [-61.9, 55.8]  | 0.63 |
|                                                   |      |           | Min, Max                  | -93.4, 1118.6       | -92.0, 1366.7        |      |
|                                                   |      |           | One-sample t-test         | 0.027               | 0.032                |      |
| 対数変換 尿中<br>アルブミン(アル<br>ブミン) (ln<br>( $\mu$ g/mL)) | 測定値  | 0 週       | n                         | 64                  | 67                   |      |
|                                                   |      |           | Mean ± SD                 | 2.82 ± 1.80         | 3.08 ± 1.79          | 0.40 |
|                                                   |      |           | Median [Q1, Q3]           | 2.56 [1.67, 3.88]   | 2.94 [1.82, 4.21]    | 0.28 |
|                                                   |      |           | Min, Max                  | -0.69, 7.25         | -0.51, 8.43          |      |
|                                                   |      | 12 週      | n                         | 61                  | 66                   |      |
|                                                   |      |           | Mean ± SD                 | 2.51 ± 1.70         | 2.99 ± 1.91          | 0.14 |
|                                                   |      |           | Median [Q1, Q3]           | 2.19 [1.48, 3.58]   | 2.88 [1.86, 4.02]    | 0.10 |
|                                                   |      |           | Min, Max                  | -0.69, 7.70         | -0.51, 7.40          |      |
|                                                   |      | 24 週      | n                         | 61                  | 63                   |      |
|                                                   |      |           | Mean ± SD                 | 2.63 ± 1.56         | 2.90 ± 1.76          | 0.37 |
|                                                   |      |           | Median [Q1, Q3]           | 2.50 [1.72, 3.45]   | 2.80 [1.46, 3.71]    | 0.50 |
|                                                   |      |           | Min, Max                  | -0.36, 6.93         | -0.22, 8.64          |      |
|                                                   | 変化量  | 12 週      | n                         | 61                  | 66                   |      |
|                                                   |      |           | Mean ± SD                 | -0.26 ± 1.22        | -0.07 ± 1.28         | 0.39 |
|                                                   |      |           | Median [Q1, Q3]           | -0.15 [-0.57, 0.37] | -0.16 [-1.08, 0.72]  | 0.64 |
|                                                   |      |           | Min, Max                  | -5.11, 2.81         | -3.15, 3.23          |      |
|                                                   |      |           | One-sample t-test         | 0.10                | 0.67                 |      |
|                                                   |      | 24 週      | n                         | 61                  | 63                   |      |
| Mean ± SD                                         |      |           | -0.09 ± 1.11              | -0.11 ± 1.10        | 0.89                 |      |
| Median [Q1, Q3]                                   |      |           | 0.00 [-0.69, 0.45]        | -0.15 [-0.96, 0.44] | 0.63                 |      |
| Min, Max                                          |      |           | -2.72, 2.50               | -2.53, 2.69         |                      |      |
| One-sample t-test                                 |      |           | 0.54                      | 0.41                |                      |      |
| 変化率                                               | 12 週 | n         | 60                        | 66                  |                      |      |
|                                                   |      | Mean ± SD | 7.9 ± 73.6                | 9.6 ± 253.3         | 0.96                 |      |
|                                                   |      |           |                           |                     |                      |      |

## 5. 副次評価項目

## 5.2. PPS

## 特殊尿検査

|                                   |      |                           |                           |                     |                     |      |
|-----------------------------------|------|---------------------------|---------------------------|---------------------|---------------------|------|
|                                   |      |                           | Median [Q1, Q3]           | -5.8 [-24.1, 21.1]  | -5.6 [-37.7, 21.5]  | 0.76 |
|                                   |      |                           | Min, Max                  | -83.9, 306.9        | -848.3, 1771.0      |      |
|                                   |      |                           | One-sample t-test         | 0.41                | 0.76                |      |
|                                   |      |                           | Wilcoxon signed-rank test | 0.50                | 0.33                |      |
|                                   |      | 24 週                      | n                         | 60                  | 63                  |      |
|                                   |      |                           | Mean ± SD                 | 22.5 ± 145.5        | -7.3 ± 336.1        | 0.53 |
|                                   |      |                           | Median [Q1, Q3]           | -3.6 [-29.0, 22.1]  | -6.6 [-29.8, 11.1]  | 0.47 |
|                                   |      |                           | Min, Max                  | -95.0, 1054.1       | -2226.7, 1294.0     |      |
|                                   |      |                           | One-sample t-test         | 0.24                | 0.86                |      |
|                                   |      |                           | Wilcoxon signed-rank test | 0.91                | 0.15                |      |
| 尿中アルブミン<br>(クレアチニン)<br>(mg/dL)    | 測定値  | 0 週                       | n                         | 64                  | 67                  |      |
|                                   |      |                           | Mean ± SD                 | 98.6 ± 57.4         | 107.4 ± 57.2        | 0.38 |
|                                   |      |                           | Median [Q1, Q3]           | 86.5 [56.1, 141.3]  | 98.4 [64.8, 152.1]  | 0.36 |
|                                   |      |                           | Min, Max                  | 7.2, 251.0          | 14.8, 273.2         |      |
|                                   |      | 12 週                      | n                         | 61                  | 66                  |      |
|                                   |      |                           | Mean ± SD                 | 100.3 ± 62.6        | 95.5 ± 69.0         | 0.68 |
|                                   |      |                           | Median [Q1, Q3]           | 85.5 [55.2, 132.0]  | 75.2 [41.9, 125.0]  | 0.45 |
|                                   |      |                           | Min, Max                  | 11.0, 329.8         | 6.7, 358.9          |      |
|                                   |      | 24 週                      | n                         | 61                  | 63                  |      |
|                                   |      |                           | Mean ± SD                 | 104.0 ± 81.6        | 86.6 ± 49.0         | 0.15 |
|                                   |      |                           | Median [Q1, Q3]           | 86.2 [55.4, 135.9]  | 83.0 [54.6, 116.2]  | 0.36 |
|                                   |      |                           | Min, Max                  | 13.8, 482.6         | 16.6, 283.0         |      |
|                                   | 変化量  | 12 週                      | n                         | 61                  | 66                  |      |
|                                   |      |                           | Mean ± SD                 | 1.2 ± 72.2          | -10.9 ± 71.3        | 0.35 |
|                                   |      |                           | Median [Q1, Q3]           | 6.7 [-30.1, 39.7]   | -3.0 [-48.5, 35.1]  | 0.34 |
|                                   |      |                           | Min, Max                  | -193.9, 276.8       | -204.5, 174.8       |      |
|                                   |      |                           | One-sample t-test         | 0.90                | 0.22                |      |
|                                   |      |                           | Wilcoxon signed-rank test | 0.66                | 0.30                |      |
|                                   |      | 24 週                      | n                         | 61                  | 63                  |      |
|                                   |      |                           | Mean ± SD                 | 5.2 ± 77.0          | -17.4 ± 58.3        | 0.07 |
|                                   |      |                           | Median [Q1, Q3]           | 0.5 [-29.8, 36.0]   | -10.6 [-51.5, 11.9] | 0.12 |
|                                   |      |                           | Min, Max                  | -174.6, 333.3       | -204.8, 131.0       |      |
|                                   |      |                           | One-sample t-test         | 0.60                | 0.021               |      |
|                                   |      |                           | Wilcoxon signed-rank test | 0.95                | 0.030               |      |
| 変化率                               | 12 週 | n                         | 61                        | 66                  |                     |      |
|                                   |      | Mean ± SD                 | 41.8 ± 140.3              | 8.2 ± 77.7          | 0.09                |      |
|                                   |      | Median [Q1, Q3]           | 7.6 [-36.0, 46.5]         | -6.0 [-47.1, 42.0]  | 0.24                |      |
|                                   |      | Min, Max                  | -93.8, 553.3              | -91.3, 320.3        |                     |      |
|                                   |      | One-sample t-test         | 0.023                     | 0.39                |                     |      |
|                                   |      | Wilcoxon signed-rank test | 0.21                      | 0.96                |                     |      |
|                                   | 24 週 | n                         | 61                        | 63                  |                     |      |
|                                   |      | Mean ± SD                 | 34.5 ± 109.5              | 5.6 ± 90.8          | 0.11                |      |
|                                   |      | Median [Q1, Q3]           | 1.1 [-25.3, 59.8]         | -18.1 [-39.0, 20.7] | 0.08                |      |
|                                   |      | Min, Max                  | -86.1, 492.5              | -92.3, 519.8        |                     |      |
|                                   |      | One-sample t-test         | 0.017                     | 0.62                |                     |      |
|                                   |      | Wilcoxon signed-rank test | 0.19                      | 0.14                |                     |      |
| 対数変換 尿中<br>アルブミン(クレ<br>アチニン) (ln) | 測定値  | 0 週                       | n                         | 64                  | 67                  |      |
|                                   |      |                           | Mean ± SD                 | 4.37 ± 0.75         | 4.50 ± 0.66         | 0.31 |
|                                   |      |                           | Median [Q1, Q3]           | 4.46 [4.03, 4.95]   | 4.59 [4.17, 5.02]   | 0.36 |



## 5. 副次評価項目

## 5.2. PPS

## 特殊尿検査

|                                         |      |                           |                           |                    |                     |       |
|-----------------------------------------|------|---------------------------|---------------------------|--------------------|---------------------|-------|
| (mg/dL))                                |      | Min, Max                  | 1.97, 5.53                | 2.69, 5.61         |                     |       |
|                                         | 12 週 | n                         | 61                        | 66                 |                     |       |
|                                         |      | Mean ±SD                  | 4.40±0.69                 | 4.28±0.82          | 0.35                |       |
|                                         |      | Median [Q1, Q3]           | 4.45 [4.01, 4.88]         | 4.32 [3.73, 4.83]  | 0.45                |       |
|                                         |      | Min, Max                  | 2.39, 5.80                | 1.89, 5.88         |                     |       |
|                                         | 24 週 | n                         | 61                        | 63                 |                     |       |
|                                         |      | Mean ±SD                  | 4.40±0.71                 | 4.29±0.64          | 0.33                |       |
|                                         |      | Median [Q1, Q3]           | 4.46 [4.01, 4.91]         | 4.42 [4.00, 4.76]  | 0.36                |       |
|                                         |      | Min, Max                  | 2.62, 6.18                | 2.81, 5.65         |                     |       |
|                                         | 変化量  | 12 週                      | n                         | 61                 | 66                  |       |
|                                         |      |                           | Mean ±SD                  | 0.01±0.83          | -0.21±0.85          | 0.14  |
|                                         |      |                           | Median [Q1, Q3]           | 0.07 [-0.45, 0.38] | -0.06 [-0.64, 0.35] | 0.24  |
|                                         |      |                           | Min, Max                  | -2.78, 1.88        | -2.44, 1.44         |       |
|                                         |      |                           | One-sample t-test         | 0.90               | 0.048               |       |
|                                         |      |                           | Wilcoxon signed-rank test | 0.70               | 0.19                |       |
|                                         |      | 24 週                      | n                         | 61                 | 63                  |       |
|                                         |      |                           | Mean ±SD                  | 0.03±0.75          | -0.18±0.69          | 0.11  |
|                                         |      |                           | Median [Q1, Q3]           | 0.01 [-0.29, 0.47] | -0.20 [-0.49, 0.19] | 0.08  |
|                                         |      |                           | Min, Max                  | -1.97, 1.78        | -2.57, 1.82         |       |
|                                         |      |                           | One-sample t-test         | 0.76               | 0.045               |       |
|                                         |      |                           | Wilcoxon signed-rank test | 0.68               | 0.025               |       |
|                                         | 変化率  | 12 週                      | n                         | 61                 | 66                  |       |
|                                         |      |                           | Mean ±SD                  | 2.9±22.9           | -3.4±19.1           | 0.09  |
|                                         |      |                           | Median [Q1, Q3]           | 1.6 [-9.7, 8.9]    | -1.5 [-16.1, 7.1]   | 0.24  |
| Min, Max                                |      |                           | -53.7, 95.2               | -56.3, 45.7        |                     |       |
| One-sample t-test                       |      |                           | 0.32                      | 0.15               |                     |       |
| Wilcoxon signed-rank test               |      |                           | 0.60                      | 0.27               |                     |       |
| 24 週                                    |      | n                         | 61                        | 63                 |                     |       |
|                                         |      | Mean ±SD                  | 3.0±20.7                  | -2.6±16.4          | 0.10                |       |
|                                         |      | Median [Q1, Q3]           | 0.3 [-6.5, 13.1]          | -4.3 [-11.9, 4.4]  | 0.06                |       |
|                                         |      | Min, Max                  | -39.0, 81.3               | -47.6, 58.1        |                     |       |
|                                         |      | One-sample t-test         | 0.26                      | 0.21               |                     |       |
|                                         |      | Wilcoxon signed-rank test | 0.47                      | 0.044              |                     |       |
| 尿中アルブミン<br>(クレアチニン補<br>正值) (mg/g<br>Cr) | 測定値  | 0 週                       | n                         | 63                 | 67                  |       |
|                                         |      |                           | Mean ±SD                  | 126.0±350.2        | 160.6±562.6         | 0.68  |
|                                         |      |                           | Median [Q1, Q3]           | 12.3 [5.3, 83.4]   | 19.5 [6.5, 53.5]    | 0.54  |
|                                         |      |                           | Min, Max                  | 1.6, 2366.9        | 1.9, 3560.1         |       |
|                                         |      | 12 週                      | n                         | 61                 | 66                  |       |
|                                         |      |                           | Mean ±SD                  | 100.7±394.1        | 172.1±571.4         | 0.42  |
|                                         |      |                           | Median [Q1, Q3]           | 10.3 [4.9, 34.7]   | 18.7 [8.0, 61.4]    | 0.027 |
|                                         |      |                           | Min, Max                  | 1.3, 2920.0        | 1.6, 4259.3         |       |
|                                         |      | 24 週                      | n                         | 61                 | 63                  |       |
|                                         |      |                           | Mean ±SD                  | 95.8±335.4         | 161.6±503.1         | 0.39  |
|                                         |      |                           | Median [Q1, Q3]           | 14.6 [5.1, 35.0]   | 19.3 [5.9, 60.6]    | 0.19  |
|                                         |      |                           | Min, Max                  | 2.0, 2351.7        | 2.0, 3452.6         |       |
|                                         | 変化量  | 12 週                      | n                         | 60                 | 66                  |       |
|                                         |      |                           | Mean ±SD                  | -22.7±126.0        | 9.7±323.6           | 0.47  |
|                                         |      |                           | Median [Q1, Q3]           | -1.3 [-23.8, 2.7]  | -0.3 [-7.0, 18.7]   | 0.09  |
|                                         |      |                           | Min, Max                  | -567.9, 553.1      | -2030.1, 1410.1     |       |

## 5. 副次評価項目

## 5.2. PPS

## 特殊尿検査

|                                                       |                           |                           |                           |                     |                     |       |
|-------------------------------------------------------|---------------------------|---------------------------|---------------------------|---------------------|---------------------|-------|
|                                                       |                           |                           | One-sample t-test         | 0.17                | 0.81                |       |
|                                                       |                           |                           | Wilcoxon signed-rank test | 0.033               | 0.44                |       |
|                                                       |                           | 24 週                      | n                         | 60                  | 63                  |       |
|                                                       |                           |                           | Mean ±SD                  | -24.7±107.6         | -6.0±277.2          | 0.63  |
|                                                       |                           |                           | Median [Q1, Q3]           | 0.3 [-7.0, 4.7]     | -0.6 [-8.0, 18.2]   | 0.73  |
|                                                       |                           |                           | Min, Max                  | -552.6, 112.8       | -1843.0, 652.1      |       |
|                                                       | One-sample t-test         |                           | 0.08                      | 0.86                |                     |       |
|                                                       | Wilcoxon signed-rank test | 0.67                      | 0.94                      |                     |                     |       |
|                                                       | 変化率                       | 12 週                      | n                         | 60                  | 66                  |       |
|                                                       |                           |                           | Mean ±SD                  | 5.9±89.5            | 75.9±186.0          | 0.009 |
|                                                       |                           |                           | Median [Q1, Q3]           | -17.1 [-42.2, 24.2] | -3.8 [-38.6, 118.2] | 0.048 |
|                                                       |                           |                           | Min, Max                  | -92.6, 326.7        | -79.8, 784.2        |       |
|                                                       |                           |                           | One-sample t-test         | 0.61                | 0.002               |       |
|                                                       |                           |                           | Wilcoxon signed-rank test | 0.19                | 0.11                |       |
|                                                       |                           | 24 週                      | n                         | 60                  | 63                  |       |
|                                                       |                           |                           | Mean ±SD                  | 25.5±119.6          | 113.9±370.8         | 0.08  |
|                                                       |                           |                           | Median [Q1, Q3]           | 4.6 [-48.1, 26.7]   | -6.4 [-45.3, 53.2]  | 0.70  |
|                                                       |                           |                           | Min, Max                  | -93.4, 509.6        | -88.4, 1790.8       |       |
| One-sample t-test                                     |                           |                           | 0.10                      | 0.018               |                     |       |
| Wilcoxon signed-rank test                             |                           |                           | 0.99                      | 0.55                |                     |       |
| 対数変換 尿中<br>アルブミン(クレ<br>アチニン補正<br>値) (ln (mg/g<br>Cr)) | 測定値                       | 0 週                       | n                         | 63                  | 67                  |       |
|                                                       |                           |                           | Mean ±SD                  | 3.08±1.74           | 3.19±1.65           | 0.73  |
|                                                       |                           |                           | Median [Q1, Q3]           | 2.51 [1.67, 4.42]   | 2.97 [1.87, 3.98]   | 0.54  |
|                                                       |                           |                           | Min, Max                  | 0.47, 7.77          | 0.64, 8.18          |       |
|                                                       |                           | 12 週                      | n                         | 61                  | 66                  |       |
|                                                       |                           |                           | Mean ±SD                  | 2.71±1.60           | 3.32±1.71           | 0.041 |
|                                                       |                           |                           | Median [Q1, Q3]           | 2.33 [1.59, 3.55]   | 2.93 [2.08, 4.12]   | 0.027 |
|                                                       |                           |                           | Min, Max                  | 0.26, 7.98          | 0.47, 8.36          |       |
|                                                       |                           | 24 週                      | n                         | 61                  | 63                  |       |
|                                                       |                           |                           | Mean ±SD                  | 2.83±1.56           | 3.21±1.73           | 0.20  |
|                                                       |                           |                           | Median [Q1, Q3]           | 2.68 [1.63, 3.56]   | 2.96 [1.77, 4.10]   | 0.19  |
|                                                       |                           |                           | Min, Max                  | 0.69, 7.76          | 0.69, 8.15          |       |
|                                                       | 変化量                       | 12 週                      | n                         | 60                  | 66                  |       |
|                                                       |                           |                           | Mean ±SD                  | -0.28±0.90          | 0.14±0.90           | 0.010 |
|                                                       |                           |                           | Median [Q1, Q3]           | -0.19 [-0.55, 0.22] | -0.04 [-0.49, 0.78] | 0.048 |
|                                                       |                           |                           | Min, Max                  | -2.61, 1.45         | -1.60, 2.18         |       |
|                                                       |                           |                           | One-sample t-test         | 0.019               | 0.21                |       |
|                                                       |                           |                           | Wilcoxon signed-rank test | 0.028               | 0.46                |       |
| 24 週                                                  |                           | n                         | 60                        | 63                  |                     |       |
|                                                       |                           | Mean ±SD                  | -0.12±0.87                | 0.06±1.05           | 0.30                |       |
|                                                       |                           | Median [Q1, Q3]           | 0.04 [-0.66, 0.24]        | -0.07 [-0.60, 0.43] | 0.70                |       |
|                                                       |                           | Min, Max                  | -2.71, 1.81               | -2.16, 2.94         |                     |       |
|                                                       |                           | One-sample t-test         | 0.29                      | 0.64                |                     |       |
|                                                       |                           | Wilcoxon signed-rank test | 0.44                      | 0.81                |                     |       |
| 変化率                                                   | 12 週                      | n                         | 60                        | 66                  |                     |       |
|                                                       |                           | Mean ±SD                  | -5.0±34.1                 | 11.8±48.1           | 0.026               |       |
|                                                       |                           | Median [Q1, Q3]           | -7.2 [-27.5, 8.6]         | -1.6 [-15.3, 26.6]  | 0.047               |       |
|                                                       |                           | Min, Max                  | -68.5, 132.1              | -71.4, 196.2        |                     |       |
|                                                       |                           | One-sample t-test         | 0.26                      | 0.0499              |                     |       |

5. 副次評価項目

5.2. PPS

特殊尿検査

|  |      |                           |                   |                    |      |
|--|------|---------------------------|-------------------|--------------------|------|
|  |      | Wilcoxon signed-rank test | 0.05              | 0.38               |      |
|  | 24 週 | n                         | 60                | 63                 |      |
|  |      | Mean ± SD                 | 2.3 ± 30.9        | 12.2 ± 60.4        | 0.26 |
|  |      | Median [Q1, Q3]           | 2.3 [-22.0, 16.8] | -2.7 [-16.3, 19.8] | 0.97 |
|  |      | Min, Max                  | -50.3, 98.6       | -63.0, 254.4       |      |
|  |      | One-sample t-test         | 0.56              | 0.12               |      |
|  |      | Wilcoxon signed-rank test | 0.92              | 0.96               |      |

## 6. 安全性評価項目

### 6.1. 有害事象 発現件数

## 6. 安全性評価項目

### 6.1. 有害事象

表 6.1.1. [安全性解析対象集団] 有害事象の発現件数

| 変数            | 発現件数                 |                    |
|---------------|----------------------|--------------------|
|               | トピロキソスタット群<br>n = 70 | アロプリノール群<br>n = 70 |
| 任意の有害事象       | 28                   | 22                 |
| うっ血性心不全       | 2                    | 1                  |
| てんかん          | 1                    | 0                  |
| 意識消失          | 0                    | 1                  |
| 壊死性筋膜炎        | 0                    | 1                  |
| 感情不安定         | 1                    | 0                  |
| 感冒            | 1                    | 0                  |
| 肝機能検査値上昇      | 4                    | 5                  |
| 胸水            | 0                    | 1                  |
| 血腫            | 1                    | 0                  |
| 高カリウム血症       | 1                    | 0                  |
| 高血糖           | 1                    | 2                  |
| 死亡            | 2                    | 0                  |
| 紫斑            | 1                    | 0                  |
| 徐脈            | 0                    | 1                  |
| 消化管出血         | 1                    | 1                  |
| 心不全           | 1                    | 3                  |
| 腎機能障害         | 3                    | 2                  |
| 脱水            | 1                    | 0                  |
| 痛風            | 1                    | 1                  |
| 転倒            | 1                    | 0                  |
| 動悸            | 1                    | 0                  |
| 尿管癌           | 1                    | 0                  |
| 肺炎            | 0                    | 2                  |
| 発疹            | 1                    | 0                  |
| 皮膚炎           | 0                    | 1                  |
| 便秘症           | 1                    | 0                  |
| 裂孔ヘルニア        | 1                    | 0                  |
| 重篤 / 任意の有害事象  | 9                    | 8                  |
| 重篤 / うっ血性心不全  | 1                    | 1                  |
| 重篤 / てんかん     | 1                    | 0                  |
| 重篤 / 意識消失     | 0                    | 1                  |
| 重篤 / 壊死性筋膜炎   | 0                    | 1                  |
| 重篤 / 感情不安定    | 0                    | 0                  |
| 重篤 / 感冒       | 0                    | 0                  |
| 重篤 / 肝機能検査値上昇 | 0                    | 0                  |
| 重篤 / 胸水       | 0                    | 0                  |
| 重篤 / 血腫       | 1                    | 0                  |
| 重篤 / 高カリウム血症  | 0                    | 0                  |
| 重篤 / 高血糖      | 0                    | 0                  |
| 重篤 / 死亡       | 2                    | 0                  |

## 6. 安全性評価項目

### 6.1. 有害事象 発現件数

|             |   |   |
|-------------|---|---|
| 重篤 / 紫斑     | 0 | 0 |
| 重篤 / 徐脈     | 0 | 0 |
| 重篤 / 消化管出血  | 1 | 1 |
| 重篤 / 心不全    | 1 | 2 |
| 重篤 / 腎機能障害  | 0 | 0 |
| 重篤 / 脱水     | 1 | 0 |
| 重篤 / 痛風     | 0 | 0 |
| 重篤 / 転倒     | 0 | 0 |
| 重篤 / 動悸     | 0 | 0 |
| 重篤 / 尿管癌    | 1 | 0 |
| 重篤 / 肺炎     | 0 | 2 |
| 重篤 / 発疹     | 0 | 0 |
| 重篤 / 皮膚炎    | 0 | 0 |
| 重篤 / 便秘症    | 0 | 0 |
| 重篤 / 裂孔ヘルニア | 0 | 0 |

6. 安全性評価項目  
6.1. 有害事象  
発現例数と発現率(%)

表 6.1.2. [安全性解析対象集団] 有害事象の発現例数と発現率(%)

| 変数            | 発現例数(%)              |                    | 群間比較 P 値          |              |
|---------------|----------------------|--------------------|-------------------|--------------|
|               | トピロキソスタット群<br>n = 70 | アロプリノール群<br>n = 70 | $\chi^2$ 二乗<br>検定 | Fisher<br>検定 |
| 死亡            | 2 (2.9)              | 0 (0.0)            | 0.15*             | 0.50         |
| 任意の有害事象       | 21 (30.0)            | 14 (20.0)          | 0.17              | 0.24         |
| うっ血性心不全       | 2 (2.9)              | 1 (1.4)            | 0.56*             | 1.00         |
| てんかん          | 1 (1.4)              | 0 (0.0)            | 0.32*             | 1.00         |
| 意識消失          | 0 (0.0)              | 1 (1.4)            | 0.32*             | 1.00         |
| 壊死性筋膜炎        | 0 (0.0)              | 1 (1.4)            | 0.32*             | 1.00         |
| 感情不安定         | 1 (1.4)              | 0 (0.0)            | 0.32*             | 1.00         |
| 感冒            | 1 (1.4)              | 0 (0.0)            | 0.32*             | 1.00         |
| 肝機能検査値上昇      | 4 (5.7)              | 5 (7.1)            | 0.73*             | 1.00         |
| 胸水            | 0 (0.0)              | 1 (1.4)            | 0.32*             | 1.00         |
| 血腫            | 1 (1.4)              | 0 (0.0)            | 0.32*             | 1.00         |
| 高カリウム血症       | 1 (1.4)              | 0 (0.0)            | 0.32*             | 1.00         |
| 高血糖           | 1 (1.4)              | 2 (2.9)            | 0.56*             | 1.00         |
| 死亡            | 2 (2.9)              | 0 (0.0)            | 0.15*             | 0.50         |
| 紫斑            | 1 (1.4)              | 0 (0.0)            | 0.32*             | 1.00         |
| 徐脈            | 0 (0.0)              | 1 (1.4)            | 0.32*             | 1.00         |
| 消化管出血         | 1 (1.4)              | 1 (1.4)            | 1.00*             | 1.00         |
| 心不全           | 1 (1.4)              | 3 (4.3)            | 0.31*             | 0.62         |
| 腎機能障害         | 3 (4.3)              | 2 (2.9)            | 0.65*             | 1.00         |
| 脱水            | 1 (1.4)              | 0 (0.0)            | 0.32*             | 1.00         |
| 痛風            | 1 (1.4)              | 1 (1.4)            | 1.00*             | 1.00         |
| 転倒            | 1 (1.4)              | 0 (0.0)            | 0.32*             | 1.00         |
| 動悸            | 1 (1.4)              | 0 (0.0)            | 0.32*             | 1.00         |
| 尿管癌           | 1 (1.4)              | 0 (0.0)            | 0.32*             | 1.00         |
| 肺炎            | 0 (0.0)              | 2 (2.9)            | 0.15*             | 0.50         |
| 発疹            | 1 (1.4)              | 0 (0.0)            | 0.32*             | 1.00         |
| 皮膚炎           | 0 (0.0)              | 1 (1.4)            | 0.32*             | 1.00         |
| 便秘症           | 1 (1.4)              | 0 (0.0)            | 0.32*             | 1.00         |
| 裂孔ヘルニア        | 1 (1.4)              | 0 (0.0)            | 0.32*             | 1.00         |
| 重篤 / 任意の有害事象  | 6 (8.6)              | 5 (7.1)            | 0.75              | 1.00         |
| 重篤 / うっ血性心不全  | 1 (1.4)              | 1 (1.4)            | 1.00*             | 1.00         |
| 重篤 / てんかん     | 1 (1.4)              | 0 (0.0)            | 0.32*             | 1.00         |
| 重篤 / 意識消失     | 0 (0.0)              | 1 (1.4)            | 0.32*             | 1.00         |
| 重篤 / 壊死性筋膜炎   | 0 (0.0)              | 1 (1.4)            | 0.32*             | 1.00         |
| 重篤 / 感情不安定    | 0 (0.0)              | 0 (0.0)            | -                 | -            |
| 重篤 / 感冒       | 0 (0.0)              | 0 (0.0)            | -                 | -            |
| 重篤 / 肝機能検査値上昇 | 0 (0.0)              | 0 (0.0)            | -                 | -            |
| 重篤 / 胸水       | 0 (0.0)              | 0 (0.0)            | -                 | -            |
| 重篤 / 血腫       | 1 (1.4)              | 0 (0.0)            | 0.32*             | 1.00         |
| 重篤 / 高カリウム血症  | 0 (0.0)              | 0 (0.0)            | -                 | -            |
| 重篤 / 高血糖      | 0 (0.0)              | 0 (0.0)            | -                 | -            |
| 重篤 / 死亡       | 2 (2.9)              | 0 (0.0)            | 0.15*             | 0.50         |
| 重篤 / 紫斑       | 0 (0.0)              | 0 (0.0)            | -                 | -            |
| 重篤 / 徐脈       | 0 (0.0)              | 0 (0.0)            | -                 | -            |
| 重篤 / 消化管出血    | 1 (1.4)              | 1 (1.4)            | 1.00*             | 1.00         |

6. 安全性評価項目  
 6.1. 有害事象  
 発現例数と発現率(%)

|             |         |         |       |      |
|-------------|---------|---------|-------|------|
| 重篤 / 心不全    | 1 (1.4) | 2 (2.9) | 0.56* | 1.00 |
| 重篤 / 腎機能障害  | 0 (0.0) | 0 (0.0) | -     | -    |
| 重篤 / 脱水     | 1 (1.4) | 0 (0.0) | 0.32* | 1.00 |
| 重篤 / 痛風     | 0 (0.0) | 0 (0.0) | -     | -    |
| 重篤 / 転倒     | 0 (0.0) | 0 (0.0) | -     | -    |
| 重篤 / 動悸     | 0 (0.0) | 0 (0.0) | -     | -    |
| 重篤 / 尿管癌    | 1 (1.4) | 0 (0.0) | 0.32* | 1.00 |
| 重篤 / 肺炎     | 0 (0.0) | 2 (2.9) | 0.15* | 0.50 |
| 重篤 / 発疹     | 0 (0.0) | 0 (0.0) | -     | -    |
| 重篤 / 皮膚炎    | 0 (0.0) | 0 (0.0) | -     | -    |
| 重篤 / 便秘症    | 0 (0.0) | 0 (0.0) | -     | -    |
| 重篤 / 裂孔ヘルニア | 0 (0.0) | 0 (0.0) | -     | -    |

$\chi$  二乗検定の P 値において、アスタリスクがついているものは、 $\chi$  二乗検定の実施要件を満たしていないため、結果に信頼性がないことを示します。

6. 安全性評価項目  
 6.2. 痛風関節炎(副作用)  
 6.2.1 FAS/安全性解析対象集団

6.2. 痛風関節炎(副作用)

6.2.1. FAS/安全性解析対象集団

FAS と安全性解析対象集団は同一集団となったため、以下まとめて結果を表記する。

表 6.2.1.1. [FAS/安全性解析対象集団] 痛風関節炎(副作用)の発現件数

| 変数                   | 発現件数                 |                    |
|----------------------|----------------------|--------------------|
|                      | トピロキシスタット群<br>n = 70 | アロプリノール群<br>n = 70 |
| 因果関係の否定できない痛風関節炎     | 1                    | 0                  |
| 因果関係の否定できない痛風関節炎 軽度  | 1                    | 0                  |
| 因果関係の否定できない痛風関節炎 中等度 | 0                    | 0                  |
| 因果関係の否定できない痛風関節炎 高度  | 0                    | 0                  |

表 6.2.1.2. [FAS/安全性解析対象集団] 痛風関節炎(副作用)の発現例数と発現率(%)

| 変数                   | トピロキシスタット群<br>n = 70 |               | アロプリノール群<br>n = 70 |               | 群間比較 P 値          |              |
|----------------------|----------------------|---------------|--------------------|---------------|-------------------|--------------|
|                      | 発現例数<br>(%)          | 発現率の<br>95%CI | 発現例数<br>(%)        | 発現率の<br>95%CI | $\chi^2$ 二乗<br>検定 | Fisher<br>検定 |
| 因果関係の否定できない痛風関節炎     | 1 (1.4)              | (0.0, 7.7)    | 0 (0.0)            | (0.0, 5.1)    | 0.32*             | 1.00         |
| 因果関係の否定できない痛風関節炎 軽度  | 1 (1.4)              | (0.0, 7.7)    | 0 (0.0)            | (0.0, 5.1)    | 0.32*             | 1.00         |
| 因果関係の否定できない痛風関節炎 中等度 | 0 (0.0)              | (0.0, 5.1)    | 0 (0.0)            | (0.0, 5.1)    | -                 | -            |
| 因果関係の否定できない痛風関節炎 高度  | 0 (0.0)              | (0.0, 5.1)    | 0 (0.0)            | (0.0, 5.1)    | -                 | -            |

$\chi^2$  二乗検定の P 値において、アスタリスクがついているものは、 $\chi^2$  二乗検定の実施要件を満たしていないため、結果に信頼性がないことを示します。



6. 安全性評価項目  
 6.2. 痛風関節炎(副作用)  
 6.2.2. PPS

6.2.2. PPS

表 6.2.2.1. [PPS] 痛風関節炎(副作用)の発現件数

| 変数                   | 発現件数                 |                    |
|----------------------|----------------------|--------------------|
|                      | トピロキソスタット群<br>n = 64 | アロプリノール群<br>n = 67 |
| 因果関係の否定できない痛風関節炎     | 1                    | 0                  |
| 因果関係の否定できない痛風関節炎 軽度  | 1                    | 0                  |
| 因果関係の否定できない痛風関節炎 中等度 | 0                    | 0                  |
| 因果関係の否定できない痛風関節炎 高度  | 0                    | 0                  |

表 6.2.2.2. [PPS] 痛風関節炎(副作用)の発現例数と発現率(%)

| 変数                   | トピロキソスタット群<br>n = 64 |               | アロプリノール群<br>n = 67 |               | 群間比較 P 値          |              |
|----------------------|----------------------|---------------|--------------------|---------------|-------------------|--------------|
|                      | 発現例数<br>(%)          | 発現率の<br>95%CI | 発現例数<br>(%)        | 発現率の<br>95%CI | $\chi^2$ 二乗<br>検定 | Fisher<br>検定 |
| 因果関係の否定できない痛風関節炎     | 1 (1.6)              | (0.0, 8.4)    | 0 (0.0)            | (0.0, 5.4)    | 0.30*             | 0.49         |
| 因果関係の否定できない痛風関節炎 軽度  | 1 (1.6)              | (0.0, 8.4)    | 0 (0.0)            | (0.0, 5.4)    | 0.30*             | 0.49         |
| 因果関係の否定できない痛風関節炎 中等度 | 0 (0.0)              | (0.0, 5.6)    | 0 (0.0)            | (0.0, 5.4)    | -                 | -            |
| 因果関係の否定できない痛風関節炎 高度  | 0 (0.0)              | (0.0, 5.6)    | 0 (0.0)            | (0.0, 5.4)    | -                 | -            |

$\chi^2$  二乗検定の P 値において、アスタリスクがついているものは、 $\chi^2$  二乗検定の実施要件を満たしていないため、結果に信頼性がないことを示します。

6. 安全性評価項目  
 6.3. 肝機能検査値異常(副作用)  
 6.3.1. FAS/安全性解析対象集団

6.3. 肝機能検査値異常 (副作用)

6.3.1. FAS/安全性解析対象集団

FAS と安全性解析対象集団は同一集団となったため、以下まとめて結果を表記する。

表 6.3.1.1. [FAS/安全性解析対象集団] 肝機能検査値異常(副作用)の発現件数

| 変数                                  | 発現件数                 |                    |
|-------------------------------------|----------------------|--------------------|
|                                     | トピロキソスタット群<br>n = 70 | アロプリノール群<br>n = 70 |
| 因果関係の否定できない肝機能検査値異常                 | 1                    | 1                  |
| 因果関係の否定できない肝機能検査値異常 ALT             | 1                    | 0                  |
| 因果関係の否定できない肝機能検査値異常 ALT Category1   | 1                    | 0                  |
| 因果関係の否定できない肝機能検査値異常 ALT Category2   | 0                    | 0                  |
| 因果関係の否定できない肝機能検査値異常 ALT Category3   | 0                    | 0                  |
| 因果関係の否定できない肝機能検査値異常 AST             | 0                    | 0                  |
| 因果関係の否定できない肝機能検査値異常 AST Category1   | 0                    | 0                  |
| 因果関係の否定できない肝機能検査値異常 AST Category2   | 0                    | 0                  |
| 因果関係の否定できない肝機能検査値異常 AST Category3   | 0                    | 0                  |
| 因果関係の否定できない肝機能検査値異常 T-Bil           | 0                    | 1                  |
| 因果関係の否定できない肝機能検査値異常 T-Bil Category1 | 0                    | 1                  |
| 因果関係の否定できない肝機能検査値異常 T-Bil Category2 | 0                    | 0                  |
| 因果関係の否定できない肝機能検査値異常 T-Bil Category3 | 0                    | 0                  |

表 6.3.1.2. [FAS/安全性解析対象集団] 肝機能検査値異常(副作用)の発現例数と発現率(%)

| 変数                                  | トピロキソスタット群<br>n = 70 |            | アロプリノール群<br>n = 70 |            | 群間比較 P 値      |           |
|-------------------------------------|----------------------|------------|--------------------|------------|---------------|-----------|
|                                     | 発現例数(%)              | 発現率の95%CI  | 発現例数(%)            | 発現率の95%CI  | $\chi^2$ 二乗検定 | Fisher 検定 |
| 因果関係の否定できない肝機能検査値異常                 | 1 (1.4)              | (0.0, 7.7) | 1 (1.4)            | (0.0, 7.7) | 1.00*         | 1.00      |
| 因果関係の否定できない肝機能検査値異常 ALT             | 1 (1.4)              | (0.0, 7.7) | 0 (0.0)            | (0.0, 5.1) | 0.32*         | 1.00      |
| 因果関係の否定できない肝機能検査値異常 ALT Category1   | 1 (1.4)              | (0.0, 7.7) | 0 (0.0)            | (0.0, 5.1) | 0.32*         | 1.00      |
| 因果関係の否定できない肝機能検査値異常 ALT Category2   | 0 (0.0)              | (0.0, 5.1) | 0 (0.0)            | (0.0, 5.1) | -             | -         |
| 因果関係の否定できない肝機能検査値異常 ALT Category3   | 0 (0.0)              | (0.0, 5.1) | 0 (0.0)            | (0.0, 5.1) | -             | -         |
| 因果関係の否定できない肝機能検査値異常 AST             | 0 (0.0)              | (0.0, 5.1) | 0 (0.0)            | (0.0, 5.1) | -             | -         |
| 因果関係の否定できない肝機能検査値異常 AST Category1   | 0 (0.0)              | (0.0, 5.1) | 0 (0.0)            | (0.0, 5.1) | -             | -         |
| 因果関係の否定できない肝機能検査値異常 AST Category2   | 0 (0.0)              | (0.0, 5.1) | 0 (0.0)            | (0.0, 5.1) | -             | -         |
| 因果関係の否定できない肝機能検査値異常 AST Category3   | 0 (0.0)              | (0.0, 5.1) | 0 (0.0)            | (0.0, 5.1) | -             | -         |
| 因果関係の否定できない肝機能検査値異常 T-Bil           | 0 (0.0)              | (0.0, 5.1) | 1 (1.4)            | (0.0, 7.7) | 0.32*         | 1.00      |
| 因果関係の否定できない肝機能検査値異常 T-Bil Category1 | 0 (0.0)              | (0.0, 5.1) | 1 (1.4)            | (0.0, 7.7) | 0.32*         | 1.00      |
| 因果関係の否定できない肝機能検査値異常 T-Bil Category2 | 0 (0.0)              | (0.0, 5.1) | 0 (0.0)            | (0.0, 5.1) | -             | -         |
| 因果関係の否定できない肝機能検査値異常 T-Bil Category3 | 0 (0.0)              | (0.0, 5.1) | 0 (0.0)            | (0.0, 5.1) | -             | -         |

$\chi^2$  二乗検定の P 値において、アスタリスクがついているものは、 $\chi^2$  二乗検定の実施要件を満たしていないため、結果に信頼性がないことを示します。

6. 安全性評価項目  
6.3. 肝機能検査値異常(副作用)  
6.3.2. PPS

6.3.2. PPS

表 6.3.2.1. [PPS] 肝機能検査値異常(副作用)の発現件数

| 変数                                  | 発現件数                 |                    |
|-------------------------------------|----------------------|--------------------|
|                                     | トピロキシスタット群<br>n = 64 | アロプリノール群<br>n = 67 |
| 因果関係の否定できない肝機能検査値異常                 | 1                    | 1                  |
| 因果関係の否定できない肝機能検査値異常 ALT             | 1                    | 0                  |
| 因果関係の否定できない肝機能検査値異常 ALT Category1   | 1                    | 0                  |
| 因果関係の否定できない肝機能検査値異常 ALT Category2   | 0                    | 0                  |
| 因果関係の否定できない肝機能検査値異常 ALT Category3   | 0                    | 0                  |
| 因果関係の否定できない肝機能検査値異常 AST             | 0                    | 0                  |
| 因果関係の否定できない肝機能検査値異常 AST Category1   | 0                    | 0                  |
| 因果関係の否定できない肝機能検査値異常 AST Category2   | 0                    | 0                  |
| 因果関係の否定できない肝機能検査値異常 AST Category3   | 0                    | 0                  |
| 因果関係の否定できない肝機能検査値異常 T-Bil           | 0                    | 1                  |
| 因果関係の否定できない肝機能検査値異常 T-Bil Category1 | 0                    | 1                  |
| 因果関係の否定できない肝機能検査値異常 T-Bil Category2 | 0                    | 0                  |
| 因果関係の否定できない肝機能検査値異常 T-Bil Category3 | 0                    | 0                  |

表 6.3.2.2. [PPS] 肝機能検査値異常(副作用)の発現例数と発現率(%)

| 変数                                  | トピロキシスタット群<br>n = 64 |            | アロプリノール群<br>n = 67 |            | 群間比較 P 値     |           |
|-------------------------------------|----------------------|------------|--------------------|------------|--------------|-----------|
|                                     | 発現例数(%)              | 発現率の95%CI  | 発現例数(%)            | 発現率の95%CI  | $\chi^2$ 乗検定 | Fisher 検定 |
| 因果関係の否定できない肝機能検査値異常                 | 1 (1.6)              | (0.0, 8.4) | 1 (1.5)            | (0.0, 8.0) | 0.97*        | 1.00      |
| 因果関係の否定できない肝機能検査値異常 ALT             | 1 (1.6)              | (0.0, 8.4) | 0 (0.0)            | (0.0, 5.4) | 0.30*        | 0.49      |
| 因果関係の否定できない肝機能検査値異常 ALT Category1   | 1 (1.6)              | (0.0, 8.4) | 0 (0.0)            | (0.0, 5.4) | 0.30*        | 0.49      |
| 因果関係の否定できない肝機能検査値異常 ALT Category2   | 0 (0.0)              | (0.0, 5.6) | 0 (0.0)            | (0.0, 5.4) | -            | -         |
| 因果関係の否定できない肝機能検査値異常 ALT Category3   | 0 (0.0)              | (0.0, 5.6) | 0 (0.0)            | (0.0, 5.4) | -            | -         |
| 因果関係の否定できない肝機能検査値異常 AST             | 0 (0.0)              | (0.0, 5.6) | 0 (0.0)            | (0.0, 5.4) | -            | -         |
| 因果関係の否定できない肝機能検査値異常 AST Category1   | 0 (0.0)              | (0.0, 5.6) | 0 (0.0)            | (0.0, 5.4) | -            | -         |
| 因果関係の否定できない肝機能検査値異常 AST Category2   | 0 (0.0)              | (0.0, 5.6) | 0 (0.0)            | (0.0, 5.4) | -            | -         |
| 因果関係の否定できない肝機能検査値異常 AST Category3   | 0 (0.0)              | (0.0, 5.6) | 0 (0.0)            | (0.0, 5.4) | -            | -         |
| 因果関係の否定できない肝機能検査値異常 T-Bil           | 0 (0.0)              | (0.0, 5.6) | 1 (1.5)            | (0.0, 8.0) | 0.33*        | 1.00      |
| 因果関係の否定できない肝機能検査値異常 T-Bil Category1 | 0 (0.0)              | (0.0, 5.6) | 1 (1.5)            | (0.0, 8.0) | 0.33*        | 1.00      |
| 因果関係の否定できない肝機能検査値異常 T-Bil Category2 | 0 (0.0)              | (0.0, 5.6) | 0 (0.0)            | (0.0, 5.4) | -            | -         |
| 因果関係の否定できない肝機能検査値異常 T-Bil Category3 | 0 (0.0)              | (0.0, 5.6) | 0 (0.0)            | (0.0, 5.4) | -            | -         |

$\chi^2$  乗検定の P 値において、アスタリスクがついているものは、 $\chi^2$  乗検定の実施要件を満たしていないため、結果に信頼性がないことを示します。

## 7. 部分集団解析

### 7.1. FAS

#### 7.1.1. 部分集団 1

## 7. 部分集団解析

### 7.1. FAS

#### 7.1.1. 部分集団 1

eGFRについて、ベースライン値が 50 mL/min/1.73m<sup>2</sup> 未満、かつ 24 週時変化率の絶対値が 15%以上の症例を除いた集団を部分集団 1 とする。

表 7.1.1.1. [FAS] 要約統計量と t 検定、Wilcoxon 検定

| 変数                          |     | 観察ポイント | 統計量                       | トピロキソスタット群      | アロプリノール群         | 群間比較 P 値 |
|-----------------------------|-----|--------|---------------------------|-----------------|------------------|----------|
| 対数変換 NT-proBNP (ln (pg/mL)) | 測定値 | 24 週   | n                         | 57              | 56               |          |
|                             |     |        | Mean ± SD                 | 6.5 ± 0.9       | 6.2 ± 1.0        | 0.11     |
|                             |     |        | Median [Q1, Q3]           | 6.3 [5.9, 7.1]  | 6.1 [5.5, 7.0]   | 0.10     |
|                             |     |        | Min, Max                  | 4.7, 8.9        | 4.2, 8.8         |          |
|                             | 変化率 | 24 週   | n                         | 57              | 56               |          |
|                             |     |        | Mean ± SD                 | 0.9 ± 7.9       | -0.5 ± 8.3       | 0.36     |
|                             |     |        | Median [Q1, Q3]           | 0.2 [-3.3, 4.2] | -0.4 [-4.4, 4.2] | 0.68     |
|                             |     |        | Min, Max                  | -15.5, 30.5     | -27.6, 16.9      |          |
|                             |     |        | One-sample t-test         | 0.41            | 0.65             |          |
|                             |     |        | Wilcoxon signed-rank test | 0.66            | 0.92             |          |

表 7.1.1.2. [FAS] 共分散分析

| 変数                          | 観察ポイント | n    | 調整済み平均値 (SE) |           | 調整済み平均値の差 (95%CI) | 群間比較 P 値        |      |
|-----------------------------|--------|------|--------------|-----------|-------------------|-----------------|------|
|                             |        |      | トピロキソスタット群   | アロプリノール群  |                   |                 |      |
| 対数変換 NT-proBNP (ln (pg/mL)) | 変化率    | 24 週 | 113          | 0.0 (1.2) | -1.4 (1.2)        | 1.4 (-1.6, 4.4) | 0.37 |

群を固定効果、割付調整因子 (BNP 200 pg/ml 未満 / 200 pg/ml 以上、心臓超音波検査 EF 45% 未満 / 45% 以上) を共変量とした共分散分析を実施。

表 7.1.1.3. [FAS] MMRM

| 変数                          | 観察ポイント | n    | 調整済み平均値 (SE) |           | 調整済み平均値の差 (95%CI) | 群間比較 P 値        |      |
|-----------------------------|--------|------|--------------|-----------|-------------------|-----------------|------|
|                             |        |      | トピロキソスタット群   | アロプリノール群  |                   |                 |      |
| 対数変換 NT-proBNP (ln (pg/mL)) | 変化率    | 24 週 | 118          | 0.4 (1.2) | -0.7 (1.2)        | 1.1 (-1.9, 4.2) | 0.47 |

群および時期効果、群と時期の交互作用、割付調整因子 (BNP 200 pg/ml 未満 / 200 pg/ml 以上、心臓超音波検査 EF 45% 未満 / 45% 以上) を固定効果、研究対象者を変量効果としたモデルにて MMRM を実施。

## 7. 部分集団解析

### 7.1. FAS

#### 7.1.2. 部分集団 2

##### 7.1.2. 部分集団 2

eGFR について、ベースライン値が 50 mL/min/1.73m<sup>2</sup> 以上 60 mL/min/1.73m<sup>2</sup> 未満、かつ 24 週時変化率が -15% 以下、かつ 24 週時測定値が 50 mL/min/1.73m<sup>2</sup> 未満の症例を除いた集団を部分集団 2 とする。

表 7.1.2.1. [FAS] 要約統計量と t 検定、Wilcoxon 検定

| 変数                                |     | 観察ポイント | 統計量                       | トピロキソスタット群      | アロプリノール群         | 群間比較 P 値 |
|-----------------------------------|-----|--------|---------------------------|-----------------|------------------|----------|
| 対数変換<br>NT-proBNP<br>(ln (pg/mL)) | 測定値 | 24 週   | n                         | 64              | 64               |          |
|                                   |     |        | Mean ± SD                 | 6.5 ± 0.9       | 6.3 ± 1.0        | 0.14     |
|                                   |     |        | Median [Q1, Q3]           | 6.4 [5.9, 7.2]  | 6.2 [5.5, 7.0]   | 0.12     |
|                                   |     |        | Min, Max                  | 4.7, 8.9        | 4.2, 9.4         |          |
|                                   | 変化率 | 24 週   | n                         | 64              | 64               |          |
|                                   |     |        | Mean ± SD                 | 1.2 ± 7.4       | -0.3 ± 8.0       | 0.27     |
|                                   |     |        | Median [Q1, Q3]           | 0.4 [-2.9, 4.4] | -0.4 [-4.2, 5.0] | 0.48     |
|                                   |     |        | Min, Max                  | -15.5, 28.4     | -27.6, 16.9      |          |
|                                   |     |        | One-sample t-test         | 0.19            | 0.77             |          |
|                                   |     |        | Wilcoxon signed-rank test | 0.29            | 0.82             |          |

表 7.1.2.2. [FAS] 共分散分析

| 変数                                |     | 観察ポイント | n   | 調整済み平均値 (SE) |            | 調整済み平均値の差 (95%CI) | 群間比較 P 値 |
|-----------------------------------|-----|--------|-----|--------------|------------|-------------------|----------|
|                                   |     |        |     | トピロキソスタット群   | アロプリノール群   |                   |          |
| 対数変換<br>NT-proBNP<br>(ln (pg/mL)) | 変化率 | 24 週   | 128 | 0.4 (1.1)    | -1.0 (1.1) | 1.4 (-1.4, 4.1)   | 0.32     |

群を固定効果、割付調整因子 (BNP 200 pg/ml 未満 / 200 pg/ml 以上、心臓超音波検査 EF 45% 未満 / 45% 以上) を共変量とした共分散分析を実施。

表 7.1.2.3. [FAS] MMRM

| 変数                                |     | 観察ポイント | n   | 調整済み平均値 (SE) |            | 調整済み平均値の差 (95%CI) | 群間比較 P 値 |
|-----------------------------------|-----|--------|-----|--------------|------------|-------------------|----------|
|                                   |     |        |     | トピロキソスタット群   | アロプリノール群   |                   |          |
| 対数変換<br>NT-proBNP<br>(ln (pg/mL)) | 変化率 | 24 週   | 132 | 0.6 (1.1)    | -0.5 (1.0) | 1.1 (-1.7, 3.8)   | 0.45     |

群および時期効果、群と時期の交互作用、割付調整因子 (BNP 200 pg/ml 未満 / 200 pg/ml 以上、心臓超音波検査 EF 45% 未満 / 45% 以上) を固定効果、研究対象者を変量効果としたモデルにて MMRM を実施。

7. 部分集団解析

7.1. FAS

7.1.3. 部分集団 3

7.1.3. 部分集団 3

eGFRについて、ベースライン値が 60 mL/min/1.73m<sup>2</sup>以上、かつ 24 週時測定値が 50 mL/min/1.73m<sup>2</sup>未満の症例を除いた集団を部分集団 3 とする。

表 7.1.3.1. [FAS] 要約統計量と t 検定、Wilcoxon 検定

| 変数                                |     | 観察<br>ポイント | 統計量                       | トピロキソスタット群      | アロプリノール群         | 群間比較<br>P 値 |
|-----------------------------------|-----|------------|---------------------------|-----------------|------------------|-------------|
| 対数変換<br>NT-proBNP<br>(ln (pg/mL)) | 測定値 | 24 週       | n                         | 65              | 66               |             |
|                                   |     |            | Mean ± SD                 | 6.5 ± 0.9       | 6.3 ± 1.0        | 0.23        |
|                                   |     |            | Median [Q1, Q3]           | 6.4 [5.9, 7.1]  | 6.2 [5.5, 7.0]   | 0.18        |
|                                   |     |            | Min, Max                  | 4.7, 8.4        | 4.2, 9.4         |             |
|                                   | 変化率 | 24 週       | n                         | 65              | 66               |             |
|                                   |     |            | Mean ± SD                 | 1.4 ± 8.2       | -0.4 ± 8.0       | 0.21        |
|                                   |     |            | Median [Q1, Q3]           | 0.3 [-3.1, 4.2] | -0.4 [-4.3, 5.0] | 0.51        |
|                                   |     |            | Min, Max                  | -15.5, 30.5     | -27.6, 16.9      |             |
|                                   |     |            | One-sample t-test         | 0.18            | 0.69             |             |
|                                   |     |            | Wilcoxon signed-rank test | 0.37            | 0.92             |             |

表 7.1.3.2. [FAS] 共分散分析

| 変数                                |     | 観察<br>ポイント | n   | 調整済み平均値 (SE) |            | 調整済み平均値<br>の差 (95%CI) | 群間比較<br>P 値 |
|-----------------------------------|-----|------------|-----|--------------|------------|-----------------------|-------------|
|                                   |     |            |     | トピロキソスタット群   | アロプリノール群   |                       |             |
| 対数変換<br>NT-proBNP<br>(ln (pg/mL)) | 変化率 | 24 週       | 131 | 0.4 (1.1)    | -1.2 (1.1) | 1.6 (-1.2, 4.4)       | 0.25        |

群を固定効果、割付調整因子 (BNP 200 pg/ml 未満 / 200 pg/ml 以上、心臓超音波検査 EF 45% 未満 / 45% 以上) を共変量とした共分散分析を実施。

表 7.1.3.3. [FAS] MMRM

| 変数                                |     | 観察<br>ポイント | n   | 調整済み平均値 (SE) |            | 調整済み平均値<br>の差 (95%CI) | 群間比較<br>P 値 |
|-----------------------------------|-----|------------|-----|--------------|------------|-----------------------|-------------|
|                                   |     |            |     | トピロキソスタット群   | アロプリノール群   |                       |             |
| 対数変換<br>NT-proBNP<br>(ln (pg/mL)) | 変化率 | 24 週       | 136 | 1.0 (1.1)    | -0.5 (1.1) | 1.5 (-1.3, 4.3)       | 0.30        |

群および時期効果、群と時期の交互作用、割付調整因子 (BNP 200 pg/ml 未満 / 200 pg/ml 以上、心臓超音波検査 EF 45% 未満 / 45% 以上) を固定効果、研究対象者を変量効果としたモデルにて MMRM を実施。

7. 部分集団解析

7.2. PPS

7.2.1. 部分集団 1

7.2. PPS

7.2.1. 部分集団 1

eGFRについて、ベースライン値が 50 mL/min/1.73m<sup>2</sup> 未満、かつ 24 週時変化率の絶対値が 15%以上の症例を除いた集団を部分集団 1 とする。

表 7.2.1.1. [PPS] 要約統計量と t 検定、Wilcoxon 検定

| 変数                                |     | 観察<br>ポイント | 統計量                       | トピロキソスタット群      | アロプリノール群        | 群間比較<br>P 値 |
|-----------------------------------|-----|------------|---------------------------|-----------------|-----------------|-------------|
| 対数変換<br>NT-proBNP<br>(ln (pg/mL)) | 測定値 | 24 週       | n                         | 52              | 54              |             |
|                                   |     |            | Mean ± SD                 | 6.4 ± 0.8       | 6.2 ± 1.0       | 0.32        |
|                                   |     |            | Median [Q1, Q3]           | 6.2 [5.9, 7.0]  | 6.1 [5.5, 7.0]  | 0.23        |
|                                   |     |            | Min, Max                  | 4.7, 8.4        | 4.6, 8.8        |             |
|                                   | 変化率 | 24 週       | n                         | 52              | 54              |             |
|                                   |     |            | Mean ± SD                 | 0.5 ± 7.7       | -0.1 ± 7.8      | 0.69        |
|                                   |     |            | Median [Q1, Q3]           | 0.0 [-3.2, 3.9] | 0.4 [-4.3, 5.0] | 0.97        |
|                                   |     |            | Min, Max                  | -15.5, 30.5     | -27.6, 16.9     |             |
|                                   |     |            | One-sample t-test         | 0.62            | 0.95            |             |
|                                   |     |            | Wilcoxon signed-rank test | 0.84            | 0.88            |             |

表 7.2.1.2. [PPS] 共分散分析

| 変数                                | 観察<br>ポイント | n    | 調整済み平均値 (SE) |            | 調整済み平均値<br>の差 (95%CI) | 群間比較<br>P 値     |      |
|-----------------------------------|------------|------|--------------|------------|-----------------------|-----------------|------|
|                                   |            |      | トピロキソスタット群   | アロプリノール群   |                       |                 |      |
| 対数変換<br>NT-proBNP<br>(ln (pg/mL)) | 変化率        | 24 週 | 106          | -0.5 (1.2) | -1.1 (1.2)            | 0.6 (-2.4, 3.6) | 0.69 |

群を固定効果、割付調整因子 (BNP 200 pg/ml 未満 / 200 pg/ml 以上、心臓超音波検査 EF 45% 未満 / 45% 以上) を共変量とした共分散分析を実施。

表 7.2.1.3. [PPS] MMRM

| 変数                                | 観察<br>ポイント | n    | 調整済み平均値 (SE) |           | 調整済み平均値<br>の差 (95%CI) | 群間比較<br>P 値     |      |
|-----------------------------------|------------|------|--------------|-----------|-----------------------|-----------------|------|
|                                   |            |      | トピロキソスタット群   | アロプリノール群  |                       |                 |      |
| 対数変換<br>NT-proBNP<br>(ln (pg/mL)) | 変化率        | 24 週 | 111          | 0.1 (1.2) | -0.5 (1.2)            | 0.6 (-2.5, 3.6) | 0.70 |

群および時期効果、群と時期の交互作用、割付調整因子 (BNP 200 pg/ml 未満 / 200 pg/ml 以上、心臓超音波検査 EF 45% 未満 / 45% 以上) を固定効果、研究対象者を変量効果としたモデルにて MMRM を実施。

7. 部分集団解析

7.2. PPS

7.2.2. 部分集団 2

7.2.2. 部分集団 2

eGFR について、ベースライン値が 50 mL/min/1.73m<sup>2</sup> 以上 60 mL/min/1.73m<sup>2</sup> 未満、かつ 24 週時変化率が -15% 以下、かつ 24 週時測定値が 50 mL/min/1.73m<sup>2</sup> 未満の症例を除いた集団を部分集団 2 とする。

表 7.2.2.1. [PPS] 要約統計量と t 検定、Wilcoxon 検定

| 変数                                |     | 観察ポイント | 統計量                       | トピロキソスタット群      | アロプリノール群        | 群間比較 P 値 |
|-----------------------------------|-----|--------|---------------------------|-----------------|-----------------|----------|
| 対数変換<br>NT-proBNP<br>(ln (pg/mL)) | 測定値 | 24 週   | n                         | 59              | 61              |          |
|                                   |     |        | Mean ± SD                 | 6.5 ± 0.9       | 6.3 ± 1.0       | 0.30     |
|                                   |     |        | Median [Q1, Q3]           | 6.4 [5.9, 7.2]  | 6.2 [5.5, 7.0]  | 0.21     |
|                                   |     |        | Min, Max                  | 4.7, 8.4        | 4.6, 9.4        |          |
|                                   | 変化率 | 24 週   | n                         | 59              | 61              |          |
|                                   |     |        | Mean ± SD                 | 1.0 ± 7.2       | 0.2 ± 7.6       | 0.58     |
|                                   |     |        | Median [Q1, Q3]           | 0.3 [-2.8, 4.1] | 0.5 [-3.9, 5.0] | 0.78     |
|                                   |     |        | Min, Max                  | -15.5, 28.4     | -27.6, 16.9     |          |
|                                   |     |        | One-sample t-test         | 0.31            | 0.83            |          |
|                                   |     |        | Wilcoxon signed-rank test | 0.38            | 0.52            |          |

表 7.2.2.2. [PPS] 共分散分析

| 変数                                |     | 観察ポイント | n   | 調整済み平均値 (SE) |            | 調整済み平均値の差 (95%CI) | 群間比較 P 値 |
|-----------------------------------|-----|--------|-----|--------------|------------|-------------------|----------|
|                                   |     |        |     | トピロキソスタット群   | アロプリノール群   |                   |          |
| 対数変換<br>NT-proBNP<br>(ln (pg/mL)) | 変化率 | 24 週   | 120 | 0.1 (1.1)    | -0.5 (1.1) | 0.6 (-2.0, 3.3)   | 0.63     |

群を固定効果、割付調整因子 (BNP 200 pg/ml 未満 / 200 pg/ml 以上、心臓超音波検査 EF 45% 未満 / 45% 以上) を共変量とした共分散分析を実施。

表 7.2.2.3. [PPS] MMRM

| 変数                                |     | 観察ポイント | n   | 調整済み平均値 (SE) |            | 調整済み平均値の差 (95%CI) | 群間比較 P 値 |
|-----------------------------------|-----|--------|-----|--------------|------------|-------------------|----------|
|                                   |     |        |     | トピロキソスタット群   | アロプリノール群   |                   |          |
| 対数変換<br>NT-proBNP<br>(ln (pg/mL)) | 変化率 | 24 週   | 124 | 0.3 (1.1)    | -0.2 (1.1) | 0.5 (-2.2, 3.3)   | 0.70     |

群および時期効果、群と時期の交互作用、割付調整因子 (BNP 200 pg/ml 未満 / 200 pg/ml 以上、心臓超音波検査 EF 45% 未満 / 45% 以上) を固定効果、研究対象者を変量効果としたモデルにて MMRM を実施。



7. 部分集団解析

7.2. PPS

7.2.3. 部分集団 3

7.2.3. 部分集団 3

eGFRについて、ベースライン値が 60 mL/min/1.73m<sup>2</sup>以上、かつ 24 週時測定値が 50 mL/min/1.73m<sup>2</sup>未満の症例を除いた集団を部分集団 3 とする。

表 7.2.3.1. [PPS] 要約統計量と t 検定、Wilcoxon 検定

| 変数                                |     | 観察<br>ポイント | 統計量                       | トピロキソスタット群      | アロプリノール群        | 群間比較<br>P 値 |
|-----------------------------------|-----|------------|---------------------------|-----------------|-----------------|-------------|
| 対数変換<br>NT-proBNP<br>(ln (pg/mL)) | 測定値 | 24 週       | n                         | 61              | 63              |             |
|                                   |     |            | Mean ± SD                 | 6.5 ± 0.9       | 6.3 ± 1.0       | 0.33        |
|                                   |     |            | Median [Q1, Q3]           | 6.4 [5.9, 7.1]  | 6.2 [5.5, 7.0]  | 0.24        |
|                                   |     |            | Min, Max                  | 4.7, 8.4        | 4.6, 9.4        |             |
|                                   | 変化率 | 24 週       | n                         | 61              | 63              |             |
|                                   |     |            | Mean ± SD                 | 1.3 ± 8.1       | 0.1 ± 7.6       | 0.39        |
|                                   |     |            | Median [Q1, Q3]           | 0.3 [-2.8, 4.1] | 0.5 [-4.0, 5.0] | 0.71        |
|                                   |     |            | Min, Max                  | -15.5, 30.5     | -27.6, 16.9     |             |
|                                   |     |            | One-sample t-test         | 0.21            | 0.93            |             |
|                                   |     |            | Wilcoxon signed-rank test | 0.37            | 0.62            |             |

表 7.2.3.2. [PPS] 共分散分析

| 変数                                |     | 観察<br>ポイント | n   | 調整済み平均値 (SE) |            | 調整済み平均値<br>の差 (95%CI) | 群間比較<br>P 値 |
|-----------------------------------|-----|------------|-----|--------------|------------|-----------------------|-------------|
|                                   |     |            |     | トピロキソスタット群   | アロプリノール群   |                       |             |
| 対数変換<br>NT-proBNP<br>(ln (pg/mL)) | 変化率 | 24 週       | 124 | 0.4 (1.2)    | -0.8 (1.1) | 1.1 (-1.6, 3.9)       | 0.42        |

群を固定効果、割付調整因子 (BNP 200 pg/ml 未満 / 200 pg/ml 以上、心臓超音波検査 EF 45% 未満 / 45% 以上) を共変量とした共分散分析を実施。

表 7.2.3.3. [PPS] MMRM

| 変数                                |     | 観察<br>ポイント | n   | 調整済み平均値 (SE) |            | 調整済み平均値<br>の差 (95%CI) | 群間比較<br>P 値 |
|-----------------------------------|-----|------------|-----|--------------|------------|-----------------------|-------------|
|                                   |     |            |     | トピロキソスタット群   | アロプリノール群   |                       |             |
| 対数変換<br>NT-proBNP<br>(ln (pg/mL)) | 変化率 | 24 週       | 129 | 0.9 (1.1)    | -0.2 (1.1) | 1.2 (-1.7, 4.0)       | 0.42        |

群および時期効果、群と時期の交互作用、割付調整因子 (BNP 200 pg/ml 未満 / 200 pg/ml 以上、心臓超音波検査 EF 45% 未満 / 45% 以上) を固定効果、研究対象者を変量効果としたモデルにて MMRM を実施。

8. 薬剤情報  
研究対象薬

8. 薬剤情報

表 8.1. [FAS] 研究対象薬の服薬の有無

| 変数        | 水準   | トピロキソスタット群 |            | アロプリノール群 |            |
|-----------|------|------------|------------|----------|------------|
|           |      | n          | 症例数(%)     | n        | 症例数(%)     |
| トピロキソスタット | 0 週  | 70         | 70 (100.0) | 70       | 0 (0.0)    |
|           | 12 週 | 70         | 69 (98.6)  | 70       | 0 (0.0)    |
|           | 24 週 | 68         | 68 (100.0) | 67       | 0 (0.0)    |
| アロプリノール   | 0 週  | 70         | 0 (0.0)    | 70       | 70 (100.0) |
|           | 12 週 | 70         | 0 (0.0)    | 70       | 67 (95.7)  |
|           | 24 週 | 68         | 0 (0.0)    | 67       | 66 (98.5)  |

表 8.2. [FAS] 研究対象薬トピロキソスタットの服薬用量

| 変数                  | 観察ポイント | 水準     | トピロキソスタット群 |           | アロプリノール群 |            |
|---------------------|--------|--------|------------|-----------|----------|------------|
|                     |        |        | n          | 症例数(%)    | n        | 症例数(%)     |
| トピロキソスタット 服薬量(mg/日) | 0 週    | 0 mg   | 70         | 0 (0.0)   | 70       | 70 (100.0) |
|                     |        | 20 mg  |            | 1 (1.4)   |          | 0 (0.0)    |
|                     |        | 30 mg  |            | 0 (0.0)   |          | 0 (0.0)    |
|                     |        | 40 mg  |            | 55 (78.6) |          | 0 (0.0)    |
|                     |        | 60 mg  |            | 0 (0.0)   |          | 0 (0.0)    |
|                     |        | 80 mg  |            | 14 (20.0) |          | 0 (0.0)    |
|                     |        | 120 mg |            | 0 (0.0)   |          | 0 (0.0)    |
|                     |        | 160 mg |            | 0 (0.0)   |          | 0 (0.0)    |
|                     | 12 週   | 0 mg   | 70         | 1 (1.4)   | 70       | 70 (100.0) |
|                     |        | 20 mg  |            | 1 (1.4)   |          | 0 (0.0)    |
|                     |        | 30 mg  |            | 1 (1.4)   |          | 0 (0.0)    |
|                     |        | 40 mg  |            | 34 (48.6) |          | 0 (0.0)    |
|                     |        | 60 mg  |            | 1 (1.4)   |          | 0 (0.0)    |
|                     |        | 80 mg  |            | 26 (37.1) |          | 0 (0.0)    |
|                     |        | 120 mg |            | 6 (8.6)   |          | 0 (0.0)    |
|                     |        | 160 mg |            | 0 (0.0)   |          | 0 (0.0)    |
|                     | 24 週   | 0 mg   | 68         | 0 (0.0)   | 67       | 67 (100.0) |
|                     |        | 20 mg  |            | 1 (1.5)   |          | 0 (0.0)    |
|                     |        | 30 mg  |            | 1 (1.5)   |          | 0 (0.0)    |
|                     |        | 40 mg  |            | 31 (45.6) |          | 0 (0.0)    |
|                     |        | 60 mg  |            | 0 (0.0)   |          | 0 (0.0)    |
|                     |        | 80 mg  |            | 27 (39.7) |          | 0 (0.0)    |
|                     |        | 120 mg |            | 6 (8.8)   |          | 0 (0.0)    |
|                     |        | 160 mg |            | 2 (2.9)   |          | 0 (0.0)    |

8. 薬剤情報  
 研究対象薬

表 8.3. [FAS] 研究対象薬アロプリノールの服薬用量

| 変数                 | 観察ポイント | 水準     | トピロキソスタット群 |            | アロプリノール群 |           |
|--------------------|--------|--------|------------|------------|----------|-----------|
|                    |        |        | n          | 症例数 (%)    | n        | 症例数 (%)   |
| アロプリノール 服薬量 (mg/日) | 0 週    | 0 mg   | 70         | 70 (100.0) | 70       | 0 (0.0)   |
|                    |        | 100 mg |            | 0 (0.0)    |          | 69 (98.6) |
|                    |        | 200 mg |            | 0 (0.0)    |          | 1 (1.4)   |
|                    | 12 週   | 0 mg   | 70         | 70 (100.0) | 70       | 3 (4.3)   |
|                    |        | 100 mg |            | 0 (0.0)    |          | 48 (68.6) |
|                    |        | 200 mg |            | 0 (0.0)    |          | 19 (27.1) |
|                    | 24 週   | 0 mg   | 68         | 68 (100.0) | 67       | 1 (1.5)   |
|                    |        | 100 mg |            | 0 (0.0)    |          | 46 (68.7) |
|                    |        | 200 mg |            | 0 (0.0)    |          | 20 (29.9) |

8. 薬剤情報  
併用薬 ベースライン時

表 8.4. [FAS] 併用薬 ベースライン時

| 変数                                | 症例数(%)               |                    | 群間比較 P 値         |              |
|-----------------------------------|----------------------|--------------------|------------------|--------------|
|                                   | トピロキソスタット群<br>n = 70 | アロプリノール群<br>n = 70 | $\chi^2$ 乗<br>検定 | Fisher<br>検定 |
| 併用薬(研究対象薬以外の薬剤)                   | 70 (100.0)           | 69 (98.6)          | 0.32*            | 1.00         |
| SU 薬                              | 3 (4.3)              | 2 (2.9)            | 0.65*            | 1.00         |
| ビグアナイド薬                           | 6 (8.6)              | 5 (7.1)            | 0.75             | 1.00         |
| $\alpha$ グルコシダーゼ阻害薬               | 6 (8.6)              | 10 (14.3)          | 0.29             | 0.43         |
| 速効型インスリン分泌促進薬                     | 1 (1.4)              | 1 (1.4)            | 1.00*            | 1.00         |
| チアゾリジン薬                           | 1 (1.4)              | 1 (1.4)            | 1.00*            | 1.00         |
| 選択的 DPP-4 阻害剤                     | 13 (18.6)            | 11 (15.7)          | 0.65             | 0.82         |
| 選択的 SGLT2 阻害剤                     | 0 (0.0)              | 0 (0.0)            | -                | -            |
| GLP-1 受容体作動薬                      | 1 (1.4)              | 0 (0.0)            | 0.32*            | 1.00         |
| インスリン                             | 2 (2.9)              | 4 (5.7)            | 0.40*            | 0.68         |
| 利尿薬                               | 48 (68.6)            | 48 (68.6)          | 1.00             | 1.00         |
| カルシウム拮抗薬                          | 31 (44.3)            | 31 (44.3)          | 1.00             | 1.00         |
| $\alpha$ 遮断薬                      | 0 (0.0)              | 1 (1.4)            | 0.32*            | 1.00         |
| $\beta$ 遮断薬                       | 33 (47.1)            | 35 (50.0)          | 0.74             | 0.87         |
| $\alpha 1 \beta$ 遮断薬              | 16 (22.9)            | 17 (24.3)          | 0.84             | 1.00         |
| ACEI                              | 14 (20.0)            | 20 (28.6)          | 0.24             | 0.32         |
| ARB                               | 32 (45.7)            | 38 (54.3)          | 0.31             | 0.40         |
| 直接的レニン阻害薬                         | 1 (1.4)              | 2 (2.9)            | 0.56*            | 1.00         |
| V2-受容体拮抗剤                         | 2 (2.9)              | 3 (4.3)            | 0.65*            | 1.00         |
| 血管・腎作動性高血圧治療剤                     | 1 (1.4)              | 0 (0.0)            | 0.32*            | 1.00         |
| スタチン                              | 39 (55.7)            | 40 (57.1)          | 0.86             | 1.00         |
| エゼチミブ                             | 2 (2.9)              | 4 (5.7)            | 0.40*            | 0.68         |
| EPA                               | 2 (2.9)              | 3 (4.3)            | 0.65*            | 1.00         |
| 抗凝固剤                              | 17 (24.3)            | 20 (28.6)          | 0.57             | 0.70         |
| 抗血小板剤                             | 28 (40.0)            | 35 (50.0)          | 0.23             | 0.31         |
| 経口 FXa 阻害剤                        | 10 (14.3)            | 11 (15.7)          | 0.81             | 1.00         |
| 選択的直接作用型第 Xa 因子阻害剤                | 18 (25.7)            | 11 (15.7)          | 0.14             | 0.21         |
| 5-HT2 ブロッカー                       | 0 (0.0)              | 1 (1.4)            | 0.32*            | 1.00         |
| Ca <sup>++</sup> 拮抗性不整脈・虚血性心疾患治療剤 | 2 (2.9)              | 1 (1.4)            | 0.56*            | 1.00         |
| H1 ブロッカー点眼剤                       | 0 (0.0)              | 1 (1.4)            | 0.32*            | 1.00         |
| H2 受容体拮抗剤                         | 3 (4.3)              | 4 (5.7)            | 0.70*            | 1.00         |
| アルツハイマー型、レビー小体型認知症治療剤             | 0 (0.0)              | 1 (1.4)            | 0.32*            | 1.00         |
| アルツハイマー型認知症治療剤                    | 0 (0.0)              | 1 (1.4)            | 0.32*            | 1.00         |
| アルドース還元酵素阻害剤                      | 0 (0.0)              | 1 (1.4)            | 0.32*            | 1.00         |
| アレルギー性疾患治療剤                       | 2 (2.9)              | 0 (0.0)            | 0.15*            | 0.50         |
| ジギタリス配糖体製剤                        | 2 (2.9)              | 2 (2.9)            | 1.00*            | 1.00         |
| セロトニン・ノルアドレナリン再取り込み阻害剤            | 1 (1.4)              | 0 (0.0)            | 0.32*            | 1.00         |
| チアピリド製剤                           | 0 (0.0)              | 1 (1.4)            | 0.32*            | 1.00         |
| ドパミン作動性パーキンソン病治療剤                 | 1 (1.4)              | 0 (0.0)            | 0.32*            | 1.00         |
| ドライパウダー吸入式喘息・COPD 治療配合剤           | 1 (1.4)              | 0 (0.0)            | 0.32*            | 1.00         |
| プロトンポンプ・インヒビター                    | 33 (47.1)            | 41 (58.6)          | 0.18             | 0.24         |
| ホスホジエステラーゼ阻害剤                     | 1 (1.4)              | 0 (0.0)            | 0.32*            | 1.00         |
| マイナートランキライザー                      | 1 (1.4)              | 0 (0.0)            | 0.32*            | 1.00         |

8. 薬剤情報  
併用薬 ベースライン時

|                            |           |           |        |      |
|----------------------------|-----------|-----------|--------|------|
| ロイコトリエン受容体拮抗薬              | 0 (0.0)   | 1 (1.4)   | 0.32*  | 1.00 |
| 亜鉛含有胃潰瘍治療剤                 | 1 (1.4)   | 0 (0.0)   | 0.32*  | 1.00 |
| 胃炎・胃潰瘍治療剤                  | 4 (5.7)   | 6 (8.6)   | 0.51   | 0.74 |
| 胃炎・潰瘍治療剤                   | 3 (4.3)   | 0 (0.0)   | 0.08*  | 0.24 |
| 下行性疼痛抑制系賦活型疼痛治療剤           | 0 (0.0)   | 1 (1.4)   | 0.32*  | 1.00 |
| 可溶性の非イオン型鉄剤                | 0 (0.0)   | 2 (2.9)   | 0.15*  | 0.50 |
| 解熱鎮痛消炎剤                    | 3 (4.3)   | 2 (2.9)   | 0.65*  | 1.00 |
| 活性生菌製剤                     | 1 (1.4)   | 0 (0.0)   | 0.32*  | 1.00 |
| 緩下剤                        | 1 (1.4)   | 1 (1.4)   | 1.00*  | 1.00 |
| 肝・胆・消化機能改善剤                | 4 (5.7)   | 2 (2.9)   | 0.40*  | 0.68 |
| 肝臓疾患用剤・アレルギー用薬             | 0 (0.0)   | 1 (1.4)   | 0.32*  | 1.00 |
| 含嗽剤                        | 1 (1.4)   | 0 (0.0)   | 0.32*  | 1.00 |
| 気道潤滑去痰剤                    | 1 (1.4)   | 0 (0.0)   | 0.32*  | 1.00 |
| 気道粘液調整・粘膜正常化剤              | 2 (2.9)   | 0 (0.0)   | 0.15*  | 0.50 |
| 逆流性食道炎・消化性潰瘍用剤             | 1 (1.4)   | 0 (0.0)   | 0.32*  | 1.00 |
| 強心配糖体製剤                    | 1 (1.4)   | 0 (0.0)   | 0.32*  | 1.00 |
| 狭心症治療剤                     | 14 (20.0) | 11 (15.7) | 0.51   | 0.66 |
| 狭心症治療用 ISMN 製剤             | 1 (1.4)   | 0 (0.0)   | 0.32*  | 1.00 |
| 筋緊張改善剤                     | 0 (0.0)   | 1 (1.4)   | 0.32*  | 1.00 |
| 経口プロスタグランジン E1 誘導体制剤       | 0 (0.0)   | 1 (1.4)   | 0.32*  | 1.00 |
| 経皮吸収型鎮痛・抗炎症剤               | 1 (1.4)   | 1 (1.4)   | 1.00*  | 1.00 |
| 経皮吸収型鎮痛消炎剤                 | 0 (0.0)   | 2 (2.9)   | 0.15*  | 0.50 |
| 経皮鎮痛消炎剤                    | 3 (4.3)   | 0 (0.0)   | 0.08*  | 0.24 |
| 血行促進・皮膚保湿剤                 | 0 (0.0)   | 1 (1.4)   | 0.32*  | 1.00 |
| 血清カリウム抑制剤                  | 0 (0.0)   | 1 (1.4)   | 0.32*  | 1.00 |
| 抗てんかん剤                     | 5 (7.1)   | 0 (0.0)   | 0.023* | 0.06 |
| 抗甲状腺剤                      | 1 (1.4)   | 0 (0.0)   | 0.32*  | 1.00 |
| 抗精神病薬                      | 1 (1.4)   | 0 (0.0)   | 0.32*  | 1.00 |
| 抗不安剤                       | 1 (1.4)   | 1 (1.4)   | 1.00*  | 1.00 |
| 甲状腺疾患治療薬                   | 3 (4.3)   | 2 (2.9)   | 0.65*  | 1.00 |
| 高カリウム血症改善剤                 | 2 (2.9)   | 2 (2.9)   | 1.00*  | 1.00 |
| 高コレステロール血症改善剤              | 2 (2.9)   | 0 (0.0)   | 0.15*  | 0.50 |
| 合成副腎皮質ホルモン剤                | 1 (1.4)   | 0 (0.0)   | 0.32*  | 1.00 |
| 持続性選択 H1 受容体拮抗・アレルギー性疾患治療剤 | 1 (1.4)   | 1 (1.4)   | 1.00*  | 1.00 |
| 徐放型鉄剤                      | 0 (0.0)   | 2 (2.9)   | 0.15*  | 0.50 |
| 徐放性カリウム剤                   | 0 (0.0)   | 1 (1.4)   | 0.32*  | 1.00 |
| 徐放性不整脈治療剤                  | 1 (1.4)   | 0 (0.0)   | 0.32*  | 1.00 |
| 消化管運動機能改善剤                 | 2 (2.9)   | 2 (2.9)   | 1.00*  | 1.00 |
| 消化管内ガス駆除剤                  | 1 (1.4)   | 0 (0.0)   | 0.32*  | 1.00 |
| 消化酵素製剤                     | 1 (1.4)   | 0 (0.0)   | 0.32*  | 1.00 |
| 消化性潰瘍治療剤                   | 3 (4.3)   | 0 (0.0)   | 0.08*  | 0.24 |
| 植物性緩下剤                     | 3 (4.3)   | 3 (4.3)   | 1.00*  | 1.00 |
| 心選択性βブロッカー                 | 1 (1.4)   | 0 (0.0)   | 0.32*  | 1.00 |
| 心不全治療薬                     | 4 (5.7)   | 0 (0.0)   | 0.042* | 0.12 |
| 睡眠導入剤                      | 3 (4.3)   | 1 (1.4)   | 0.31*  | 0.62 |
| 睡眠誘導剤                      | 2 (2.9)   | 0 (0.0)   | 0.15*  | 0.50 |

8. 薬剤情報  
併用薬 ベースライン時

|                                     |           |          |       |      |
|-------------------------------------|-----------|----------|-------|------|
| 制酸・緩下剤                              | 15 (21.4) | 7 (10.0) | 0.06  | 0.10 |
| 整腸剤                                 | 0 (0.0)   | 1 (1.4)  | 0.32* | 1.00 |
| 生菌製剤                                | 0 (0.0)   | 1 (1.4)  | 0.32* | 1.00 |
| 精神安定剤                               | 3 (4.3)   | 0 (0.0)  | 0.08* | 0.24 |
| 選択的 $\alpha$ 1A遮断薬、前立腺肥大症に伴う排尿障害改善薬 | 1 (1.4)   | 0 (0.0)  | 0.32* | 1.00 |
| 前立腺肥大症に伴う排尿障害改善剤                    | 1 (1.4)   | 0 (0.0)  | 0.32* | 1.00 |
| 前立腺肥大症の排尿障害改善剤                      | 1 (1.4)   | 2 (2.9)  | 0.56* | 1.00 |
| 総合感冒剤                               | 1 (1.4)   | 0 (0.0)  | 0.32* | 1.00 |
| 対血管薬剤                               | 0 (0.0)   | 1 (1.4)  | 0.32* | 1.00 |
| 胆汁・腎排泄型 ACE 阻害剤                     | 1 (1.4)   | 0 (0.0)  | 0.32* | 1.00 |
| 長時間作用性吸入気管支拡張剤                      | 2 (2.9)   | 1 (1.4)  | 0.56* | 1.00 |
| 直接トロンビン阻害剤                          | 1 (1.4)   | 0 (0.0)  | 0.32* | 1.00 |
| 鎮咳剤                                 | 1 (1.4)   | 0 (0.0)  | 0.32* | 1.00 |
| 入眠剤                                 | 2 (2.9)   | 0 (0.0)  | 0.15* | 0.50 |
| 粘膜防御性胃炎・胃潰瘍治療剤                      | 0 (0.0)   | 1 (1.4)  | 0.32* | 1.00 |
| 脳循環・代謝改善剤                           | 0 (0.0)   | 1 (1.4)  | 0.32* | 1.00 |
| 排尿障害改善剤・降圧剤                         | 0 (0.0)   | 1 (1.4)  | 0.32* | 1.00 |
| 皮膚外用合成副腎皮質ホルモン剤                     | 1 (1.4)   | 0 (0.0)  | 0.32* | 1.00 |
| 頻脈性不整脈治療剤                           | 1 (1.4)   | 1 (1.4)  | 1.00* | 1.00 |
| 不整脈治療剤                              | 6 (8.6)   | 6 (8.6)  | 1.00  | 1.00 |
| 末梢性神経障害治療剤                          | 1 (1.4)   | 1 (1.4)  | 1.00* | 1.00 |
| 慢性腎不全用剤                             | 4 (5.7)   | 1 (1.4)  | 0.17* | 0.37 |
| 葉酸錠                                 | 0 (0.0)   | 1 (1.4)  | 0.32* | 1.00 |
| 喘息・COPD 治療配合剤                       | 0 (0.0)   | 1 (1.4)  | 0.32* | 1.00 |
| 疼痛治療剤                               | 1 (1.4)   | 1 (1.4)  | 1.00* | 1.00 |
| 解熱鎮痛剤                               | 0 (0.0)   | 0 (0.0)  | -     | -    |
| 不眠症治療薬                              | 0 (0.0)   | 0 (0.0)  | -     | -    |
| 骨粗鬆症治療剤                             | 0 (0.0)   | 0 (0.0)  | -     | -    |
| 皮膚外用合成副腎皮質ホルモン・抗生物質配合剤              | 0 (0.0)   | 0 (0.0)  | -     | -    |
| 漢方製剤                                | 0 (0.0)   | 0 (0.0)  | -     | -    |
| 胃炎・消化性潰瘍治療剤                         | 0 (0.0)   | 0 (0.0)  | -     | -    |
| セフェム系抗生物質                           | 0 (0.0)   | 0 (0.0)  | -     | -    |
| 抗精神病剤                               | 0 (0.0)   | 0 (0.0)  | -     | -    |

$\chi$  二乗検定の P 値において、アスタリスクがついているものは、 $\chi$  二乗検定の実施要件を満たしていないため、結果に信頼性がないことを示します。

8. 薬剤情報  
併用薬 12 週時

表 8.5. [FAS] 併用薬 12 週時

| 変数                                | 症例数 (%)              |                    | 群間比較 P 値         |              |
|-----------------------------------|----------------------|--------------------|------------------|--------------|
|                                   | トピロキシスタット群<br>n = 70 | アロプリノール群<br>n = 70 | $\chi^2$ 乗<br>検定 | Fisher<br>検定 |
| 併用薬 (研究対象薬以外の薬剤)                  | 69 (98.6)            | 69 (98.6)          | 1.00*            | 1.00         |
| SU 薬                              | 3 (4.3)              | 1 (1.4)            | 0.31*            | 0.62         |
| ビグアナイド薬                           | 6 (8.6)              | 5 (7.1)            | 0.75             | 1.00         |
| $\alpha$ グルコシダーゼ阻害薬               | 6 (8.6)              | 10 (14.3)          | 0.29             | 0.43         |
| 速効型インスリン分泌促進薬                     | 1 (1.4)              | 1 (1.4)            | 1.00*            | 1.00         |
| チアゾリジン薬                           | 1 (1.4)              | 1 (1.4)            | 1.00*            | 1.00         |
| 選択的 DPP-4 阻害剤                     | 13 (18.6)            | 11 (15.7)          | 0.65             | 0.82         |
| 選択的 SGLT2 阻害剤                     | 1 (1.4)              | 0 (0.0)            | 0.32*            | 1.00         |
| GLP-1 受容体作動薬                      | 1 (1.4)              | 0 (0.0)            | 0.32*            | 1.00         |
| インスリン                             | 2 (2.9)              | 5 (7.1)            | 0.24*            | 0.44         |
| 利尿薬                               | 47 (67.1)            | 48 (68.6)          | 0.86             | 1.00         |
| カルシウム拮抗薬                          | 29 (41.4)            | 31 (44.3)          | 0.73             | 0.86         |
| $\alpha$ 遮断薬                      | 0 (0.0)              | 1 (1.4)            | 0.32*            | 1.00         |
| $\beta$ 遮断薬                       | 32 (45.7)            | 35 (50.0)          | 0.61             | 0.74         |
| $\alpha 1 \beta$ 遮断薬              | 17 (24.3)            | 17 (24.3)          | 1.00             | 1.00         |
| ACEI                              | 12 (17.1)            | 20 (28.6)          | 0.11             | 0.16         |
| ARB                               | 33 (47.1)            | 37 (52.9)          | 0.50             | 0.61         |
| 直接的レニン阻害薬                         | 1 (1.4)              | 2 (2.9)            | 0.56*            | 1.00         |
| V2-受容体拮抗剤                         | 2 (2.9)              | 2 (2.9)            | 1.00*            | 1.00         |
| 血管・腎作動性高血圧治療剤                     | 1 (1.4)              | 0 (0.0)            | 0.32*            | 1.00         |
| スタチン                              | 38 (54.3)            | 39 (55.7)          | 0.87             | 1.00         |
| エゼチミブ                             | 2 (2.9)              | 3 (4.3)            | 0.65*            | 1.00         |
| EPA                               | 2 (2.9)              | 3 (4.3)            | 0.65*            | 1.00         |
| 抗凝固剤                              | 16 (22.9)            | 20 (28.6)          | 0.44             | 0.56         |
| 抗血小板剤                             | 27 (38.6)            | 34 (48.6)          | 0.23             | 0.31         |
| 経口 FXa 阻害剤                        | 11 (15.7)            | 11 (15.7)          | 1.00             | 1.00         |
| 選択的直接作用型第 Xa 因子阻害剤                | 18 (25.7)            | 11 (15.7)          | 0.14             | 0.21         |
| 5-HT2 ブロッカー                       | 0 (0.0)              | 1 (1.4)            | 0.32*            | 1.00         |
| Ca <sup>++</sup> 拮抗性不整脈・虚血性心疾患治療剤 | 2 (2.9)              | 1 (1.4)            | 0.56*            | 1.00         |
| H1 ブロッカー点眼剤                       | 0 (0.0)              | 1 (1.4)            | 0.32*            | 1.00         |
| H2 受容体拮抗剤                         | 4 (5.7)              | 4 (5.7)            | 1.00*            | 1.00         |
| アルツハイマー型、レビー小体型認知症治療剤             | 0 (0.0)              | 1 (1.4)            | 0.32*            | 1.00         |
| アルツハイマー型認知症治療剤                    | 0 (0.0)              | 1 (1.4)            | 0.32*            | 1.00         |
| アルドース還元酵素阻害剤                      | 0 (0.0)              | 1 (1.4)            | 0.32*            | 1.00         |
| アレルギー性疾患治療剤                       | 2 (2.9)              | 0 (0.0)            | 0.15*            | 0.50         |
| ジギタリス配糖体製剤                        | 2 (2.9)              | 2 (2.9)            | 1.00*            | 1.00         |
| セロトニン・ノルアドレナリン再取り込み阻害剤            | 1 (1.4)              | 0 (0.0)            | 0.32*            | 1.00         |
| チアピリド製剤                           | 0 (0.0)              | 1 (1.4)            | 0.32*            | 1.00         |
| ドパミン作動性パーキンソン病治療剤                 | 1 (1.4)              | 0 (0.0)            | 0.32*            | 1.00         |
| ドライパウダー吸入式喘息・COPD 治療配合剤           | 1 (1.4)              | 0 (0.0)            | 0.32*            | 1.00         |
| プロトンポンプ・インヒビター                    | 33 (47.1)            | 40 (57.1)          | 0.24             | 0.31         |
| ホスホジエステラーゼ阻害剤                     | 1 (1.4)              | 0 (0.0)            | 0.32*            | 1.00         |
| マイナートランキライザー                      | 1 (1.4)              | 1 (1.4)            | 1.00*            | 1.00         |

8. 薬剤情報  
併用薬 12 週時

|                            |           |           |        |       |
|----------------------------|-----------|-----------|--------|-------|
| ロイコトリエン受容体拮抗薬              | 0 (0.0)   | 1 (1.4)   | 0.32*  | 1.00  |
| 亜鉛含有胃潰瘍治療剤                 | 1 (1.4)   | 0 (0.0)   | 0.32*  | 1.00  |
| 胃炎・胃潰瘍治療剤                  | 4 (5.7)   | 6 (8.6)   | 0.51   | 0.74  |
| 胃炎・潰瘍治療剤                   | 3 (4.3)   | 0 (0.0)   | 0.08*  | 0.24  |
| 下行性疼痛抑制系賦活型疼痛治療剤           | 0 (0.0)   | 1 (1.4)   | 0.32*  | 1.00  |
| 可溶性の非イオン型鉄剤                | 0 (0.0)   | 2 (2.9)   | 0.15*  | 0.50  |
| 解熱鎮痛消炎剤                    | 3 (4.3)   | 2 (2.9)   | 0.65*  | 1.00  |
| 活性生菌製剤                     | 1 (1.4)   | 0 (0.0)   | 0.32*  | 1.00  |
| 緩下剤                        | 1 (1.4)   | 1 (1.4)   | 1.00*  | 1.00  |
| 肝・胆・消化機能改善剤                | 3 (4.3)   | 2 (2.9)   | 0.65*  | 1.00  |
| 肝臓疾患用剤・アレルギー用薬             | 0 (0.0)   | 1 (1.4)   | 0.32*  | 1.00  |
| 含嗽剤                        | 1 (1.4)   | 0 (0.0)   | 0.32*  | 1.00  |
| 気道潤滑去痰剤                    | 1 (1.4)   | 0 (0.0)   | 0.32*  | 1.00  |
| 気道粘液調整・粘膜正常化剤              | 2 (2.9)   | 0 (0.0)   | 0.15*  | 0.50  |
| 逆流性食道炎・消化性潰瘍用剤             | 1 (1.4)   | 0 (0.0)   | 0.32*  | 1.00  |
| 強心配糖体製剤                    | 1 (1.4)   | 0 (0.0)   | 0.32*  | 1.00  |
| 狭心症治療剤                     | 14 (20.0) | 11 (15.7) | 0.51   | 0.66  |
| 狭心症治療用 ISMN 製剤             | 1 (1.4)   | 0 (0.0)   | 0.32*  | 1.00  |
| 筋緊張改善剤                     | 0 (0.0)   | 1 (1.4)   | 0.32*  | 1.00  |
| 経口プロスタグランジン E1 誘導体制剤       | 0 (0.0)   | 1 (1.4)   | 0.32*  | 1.00  |
| 経皮吸収型鎮痛・抗炎症剤               | 1 (1.4)   | 1 (1.4)   | 1.00*  | 1.00  |
| 経皮吸収型鎮痛消炎剤                 | 0 (0.0)   | 2 (2.9)   | 0.15*  | 0.50  |
| 経皮鎮痛消炎剤                    | 3 (4.3)   | 0 (0.0)   | 0.08*  | 0.24  |
| 血行促進・皮膚保湿剤                 | 0 (0.0)   | 1 (1.4)   | 0.32*  | 1.00  |
| 血清カリウム抑制剤                  | 0 (0.0)   | 1 (1.4)   | 0.32*  | 1.00  |
| 抗てんかん剤                     | 6 (8.6)   | 0 (0.0)   | 0.012* | 0.028 |
| 抗甲状腺剤                      | 1 (1.4)   | 0 (0.0)   | 0.32*  | 1.00  |
| 抗精神病薬                      | 1 (1.4)   | 0 (0.0)   | 0.32*  | 1.00  |
| 抗不安剤                       | 1 (1.4)   | 1 (1.4)   | 1.00*  | 1.00  |
| 甲状腺疾患治療薬                   | 2 (2.9)   | 2 (2.9)   | 1.00*  | 1.00  |
| 高カリウム血症改善剤                 | 3 (4.3)   | 1 (1.4)   | 0.31*  | 0.62  |
| 高コレステロール血症改善剤              | 2 (2.9)   | 0 (0.0)   | 0.15*  | 0.50  |
| 合成副腎皮質ホルモン剤                | 1 (1.4)   | 0 (0.0)   | 0.32*  | 1.00  |
| 持続性選択 H1 受容体拮抗・アレルギー性疾患治療剤 | 1 (1.4)   | 1 (1.4)   | 1.00*  | 1.00  |
| 徐放型鉄剤                      | 0 (0.0)   | 2 (2.9)   | 0.15*  | 0.50  |
| 徐放性カリウム剤                   | 0 (0.0)   | 1 (1.4)   | 0.32*  | 1.00  |
| 徐放性不整脈治療剤                  | 1 (1.4)   | 0 (0.0)   | 0.32*  | 1.00  |
| 消化管運動機能改善剤                 | 3 (4.3)   | 2 (2.9)   | 0.65*  | 1.00  |
| 消化管内ガス駆除剤                  | 1 (1.4)   | 0 (0.0)   | 0.32*  | 1.00  |
| 消化酵素製剤                     | 1 (1.4)   | 0 (0.0)   | 0.32*  | 1.00  |
| 消化性潰瘍治療剤                   | 3 (4.3)   | 0 (0.0)   | 0.08*  | 0.24  |
| 植物性緩下剤                     | 3 (4.3)   | 3 (4.3)   | 1.00*  | 1.00  |
| 心選択性βブロッカー                 | 1 (1.4)   | 0 (0.0)   | 0.32*  | 1.00  |
| 心不全治療薬                     | 4 (5.7)   | 0 (0.0)   | 0.042* | 0.12  |
| 睡眠導入剤                      | 3 (4.3)   | 1 (1.4)   | 0.31*  | 0.62  |
| 睡眠誘導剤                      | 2 (2.9)   | 0 (0.0)   | 0.15*  | 0.50  |



8. 薬剤情報  
併用薬 12 週時

|                                      |           |          |       |      |
|--------------------------------------|-----------|----------|-------|------|
| 制酸・緩下剤                               | 16 (22.9) | 7 (10.0) | 0.040 | 0.07 |
| 整腸剤                                  | 0 (0.0)   | 1 (1.4)  | 0.32* | 1.00 |
| 生菌製剤                                 | 0 (0.0)   | 1 (1.4)  | 0.32* | 1.00 |
| 精神安定剤                                | 3 (4.3)   | 0 (0.0)  | 0.08* | 0.24 |
| 選択的 $\alpha$ 1A 遮断薬、前立腺肥大症に伴う排尿障害改善薬 | 1 (1.4)   | 0 (0.0)  | 0.32* | 1.00 |
| 前立腺肥大症に伴う排尿障害改善剤                     | 1 (1.4)   | 0 (0.0)  | 0.32* | 1.00 |
| 前立腺肥大症の排尿障害改善剤                       | 1 (1.4)   | 2 (2.9)  | 0.56* | 1.00 |
| 総合感冒剤                                | 1 (1.4)   | 0 (0.0)  | 0.32* | 1.00 |
| 対血管薬剤                                | 0 (0.0)   | 1 (1.4)  | 0.32* | 1.00 |
| 胆汁・腎排泄型 ACE 阻害剤                      | 1 (1.4)   | 0 (0.0)  | 0.32* | 1.00 |
| 長時間作用性吸入気管支拡張剤                       | 2 (2.9)   | 1 (1.4)  | 0.56* | 1.00 |
| 直接トロンビン阻害剤                           | 1 (1.4)   | 0 (0.0)  | 0.32* | 1.00 |
| 鎮咳剤                                  | 1 (1.4)   | 0 (0.0)  | 0.32* | 1.00 |
| 入眠剤                                  | 2 (2.9)   | 0 (0.0)  | 0.15* | 0.50 |
| 粘膜防御性胃炎・胃潰瘍治療剤                       | 0 (0.0)   | 1 (1.4)  | 0.32* | 1.00 |
| 脳循環・代謝改善剤                            | 0 (0.0)   | 1 (1.4)  | 0.32* | 1.00 |
| 排尿障害改善剤・降圧剤                          | 0 (0.0)   | 1 (1.4)  | 0.32* | 1.00 |
| 皮膚外用合成副腎皮質ホルモン剤                      | 1 (1.4)   | 0 (0.0)  | 0.32* | 1.00 |
| 頻脈性不整脈治療剤                            | 1 (1.4)   | 0 (0.0)  | 0.32* | 1.00 |
| 不整脈治療剤                               | 6 (8.6)   | 6 (8.6)  | 1.00  | 1.00 |
| 末梢性神経障害治療剤                           | 1 (1.4)   | 1 (1.4)  | 1.00* | 1.00 |
| 慢性腎不全用剤                              | 4 (5.7)   | 1 (1.4)  | 0.17* | 0.37 |
| 葉酸錠                                  | 0 (0.0)   | 1 (1.4)  | 0.32* | 1.00 |
| 喘息・COPD 治療配合剤                        | 0 (0.0)   | 1 (1.4)  | 0.32* | 1.00 |
| 疼痛治療剤                                | 1 (1.4)   | 1 (1.4)  | 1.00* | 1.00 |
| 解熱鎮痛剤                                | 1 (1.4)   | 0 (0.0)  | 0.32* | 1.00 |
| 不眠症治療薬                               | 1 (1.4)   | 0 (0.0)  | 0.32* | 1.00 |
| 骨粗鬆症治療剤                              | 1 (1.4)   | 0 (0.0)  | 0.32* | 1.00 |
| 皮膚外用合成副腎皮質ホルモン・抗生物質配合剤               | 1 (1.4)   | 0 (0.0)  | 0.32* | 1.00 |
| 漢方製剤                                 | 1 (1.4)   | 0 (0.0)  | 0.32* | 1.00 |
| 胃炎・消化性潰瘍治療剤                          | 0 (0.0)   | 1 (1.4)  | 0.32* | 1.00 |
| セフェム系抗生物質                            | 0 (0.0)   | 1 (1.4)  | 0.32* | 1.00 |
| 抗精神病剤                                | 1 (1.4)   | 0 (0.0)  | 0.32* | 1.00 |

$\chi$  二乗検定の P 値において、アスタリスクがついているものは、 $\chi$  二乗検定の実施要件を満たしていないため、結果に信頼性がないことを示します。

8. 薬剤情報  
併用薬 24 週時

表 8.6. [FAS] 併用薬 24 週時

| 変数                                | 症例数 (%)              |                    | 群間比較 P 値          |              |
|-----------------------------------|----------------------|--------------------|-------------------|--------------|
|                                   | トピロキソスタット群<br>n = 68 | アロプリノール群<br>n = 67 | $\chi^2$ 二乗<br>検定 | Fisher<br>検定 |
| 併用薬(研究対象薬以外の薬剤)                   | 68 (100.0)           | 66 (98.5)          | 0.31*             | 0.50         |
| SU 薬                              | 3 (4.4)              | 1 (1.5)            | 0.32*             | 0.62         |
| ビグアナイド薬                           | 6 (8.8)              | 4 (6.0)            | 0.53*             | 0.74         |
| $\alpha$ グルコシダーゼ阻害薬               | 6 (8.8)              | 8 (11.9)           | 0.55              | 0.59         |
| 速効型インスリン分泌促進薬                     | 1 (1.5)              | 1 (1.5)            | 0.99*             | 1.00         |
| チアゾリジン薬                           | 1 (1.5)              | 1 (1.5)            | 0.99*             | 1.00         |
| 選択的 DPP-4 阻害剤                     | 13 (19.1)            | 11 (16.4)          | 0.68              | 0.82         |
| 選択的 SGLT2 阻害剤                     | 1 (1.5)              | 0 (0.0)            | 0.32*             | 1.00         |
| GLP-1 受容体作動薬                      | 1 (1.5)              | 0 (0.0)            | 0.32*             | 1.00         |
| インスリン                             | 2 (2.9)              | 4 (6.0)            | 0.39*             | 0.44         |
| 利尿薬                               | 46 (67.6)            | 45 (67.2)          | 0.95              | 1.00         |
| カルシウム拮抗薬                          | 29 (42.6)            | 30 (44.8)          | 0.80              | 0.86         |
| $\alpha$ 遮断薬                      | 0 (0.0)              | 1 (1.5)            | 0.31*             | 0.50         |
| $\beta$ 遮断薬                       | 31 (45.6)            | 35 (52.2)          | 0.44              | 0.49         |
| $\alpha 1 \beta$ 遮断薬              | 17 (25.0)            | 16 (23.9)          | 0.88              | 1.00         |
| ACEI                              | 12 (17.6)            | 19 (28.4)          | 0.14              | 0.16         |
| ARB                               | 33 (48.5)            | 37 (55.2)          | 0.44              | 0.49         |
| 直接的レニン阻害薬                         | 1 (1.5)              | 2 (3.0)            | 0.55*             | 0.62         |
| V2-受容体拮抗剤                         | 3 (4.4)              | 2 (3.0)            | 0.66*             | 1.00         |
| 血管・腎作動性高血圧治療剤                     | 1 (1.5)              | 0 (0.0)            | 0.32*             | 1.00         |
| スタチン                              | 38 (55.9)            | 39 (58.2)          | 0.78              | 0.86         |
| エゼチミブ                             | 2 (2.9)              | 3 (4.5)            | 0.64*             | 0.68         |
| EPA                               | 2 (2.9)              | 3 (4.5)            | 0.64*             | 0.68         |
| 抗凝固剤                              | 15 (22.1)            | 18 (26.9)          | 0.52              | 0.55         |
| 抗血小板剤                             | 26 (38.2)            | 33 (49.3)          | 0.20              | 0.23         |
| 経口 FXa 阻害剤                        | 11 (16.2)            | 11 (16.4)          | 0.97              | 1.00         |
| 選択的直接作用型第 Xa 因子阻害剤                | 17 (25.0)            | 10 (14.9)          | 0.14              | 0.20         |
| 5-HT2 ブロッカー                       | 0 (0.0)              | 1 (1.5)            | 0.31*             | 0.50         |
| Ca <sup>++</sup> 拮抗性不整脈・虚血性心疾患治療剤 | 2 (2.9)              | 1 (1.5)            | 0.57*             | 1.00         |
| H1 ブロッカー点眼剤                       | 0 (0.0)              | 1 (1.5)            | 0.31*             | 0.50         |
| H2 受容体拮抗剤                         | 3 (4.4)              | 4 (6.0)            | 0.68*             | 0.72         |
| アルツハイマー型、レビー小体型認知症治療剤             | 0 (0.0)              | 1 (1.5)            | 0.31*             | 0.50         |
| アルツハイマー型認知症治療剤                    | 0 (0.0)              | 1 (1.5)            | 0.31*             | 0.50         |
| アルドース還元酵素阻害剤                      | 0 (0.0)              | 0 (0.0)            | -                 | -            |
| アレルギー性疾患治療剤                       | 2 (2.9)              | 0 (0.0)            | 0.16*             | 0.50         |
| ジギタリス配糖体製剤                        | 3 (4.4)              | 2 (3.0)            | 0.66*             | 1.00         |
| セロトニン・ノルアドレナリン再取り込み阻害剤            | 1 (1.5)              | 0 (0.0)            | 0.32*             | 1.00         |
| チアピリド製剤                           | 0 (0.0)              | 1 (1.5)            | 0.31*             | 0.50         |
| ドパミン作動性パーキンソン病治療剤                 | 1 (1.5)              | 0 (0.0)            | 0.32*             | 1.00         |
| ドライパウダー吸入式喘息・COPD 治療配合剤           | 1 (1.5)              | 0 (0.0)            | 0.32*             | 1.00         |
| プロトンポンプ・インヒビター                    | 33 (48.5)            | 39 (58.2)          | 0.26              | 0.30         |
| ホスホジエステラーゼ阻害剤                     | 1 (1.5)              | 0 (0.0)            | 0.32*             | 1.00         |
| マイナートランキライザー                      | 1 (1.5)              | 1 (1.5)            | 0.99*             | 1.00         |
| ロイコトリエン受容体拮抗薬                     | 0 (0.0)              | 1 (1.5)            | 0.31*             | 0.50         |

8. 薬剤情報  
併用薬 24 週時

|                            |           |           |        |       |
|----------------------------|-----------|-----------|--------|-------|
| 亜鉛含有胃潰瘍治療剤                 | 1 (1.5)   | 0 (0.0)   | 0.32*  | 1.00  |
| 胃炎・胃潰瘍治療剤                  | 4 (5.9)   | 6 (9.0)   | 0.50*  | 0.53  |
| 胃炎・潰瘍治療剤                   | 3 (4.4)   | 0 (0.0)   | 0.08*  | 0.24  |
| 下行性疼痛抑制系賦活型疼痛治療剤           | 0 (0.0)   | 1 (1.5)   | 0.31*  | 0.50  |
| 可溶性の非イオン型鉄剤                | 0 (0.0)   | 2 (3.0)   | 0.15*  | 0.24  |
| 解熱鎮痛消炎剤                    | 3 (4.4)   | 2 (3.0)   | 0.66*  | 1.00  |
| 活性生菌製剤                     | 1 (1.5)   | 0 (0.0)   | 0.32*  | 1.00  |
| 緩下剤                        | 1 (1.5)   | 1 (1.5)   | 0.99*  | 1.00  |
| 肝・胆・消化機能改善剤                | 3 (4.4)   | 2 (3.0)   | 0.66*  | 1.00  |
| 肝臓疾患用剤・アレルギー用薬             | 0 (0.0)   | 1 (1.5)   | 0.31*  | 0.50  |
| 含嗽剤                        | 1 (1.5)   | 0 (0.0)   | 0.32*  | 1.00  |
| 気道潤滑去痰剤                    | 1 (1.5)   | 0 (0.0)   | 0.32*  | 1.00  |
| 気道粘液調整・粘膜正常化剤              | 2 (2.9)   | 0 (0.0)   | 0.16*  | 0.50  |
| 逆流性食道炎・消化性潰瘍用剤             | 1 (1.5)   | 0 (0.0)   | 0.32*  | 1.00  |
| 強心配糖体制剤                    | 1 (1.5)   | 0 (0.0)   | 0.32*  | 1.00  |
| 狭心症治療剤                     | 14 (20.6) | 10 (14.9) | 0.39   | 0.50  |
| 狭心症治療用 ISMN 製剤             | 1 (1.5)   | 0 (0.0)   | 0.32*  | 1.00  |
| 筋緊張改善剤                     | 0 (0.0)   | 1 (1.5)   | 0.31*  | 0.50  |
| 経口プロスタグランジン E1 誘導体制剤       | 0 (0.0)   | 1 (1.5)   | 0.31*  | 0.50  |
| 経皮吸収型鎮痛・抗炎症剤               | 1 (1.5)   | 1 (1.5)   | 0.99*  | 1.00  |
| 経皮吸収型鎮痛消炎剤                 | 0 (0.0)   | 1 (1.5)   | 0.31*  | 0.50  |
| 経皮鎮痛消炎剤                    | 3 (4.4)   | 0 (0.0)   | 0.08*  | 0.24  |
| 血行促進・皮膚保湿剤                 | 0 (0.0)   | 0 (0.0)   | -      | -     |
| 血清カリウム抑制剤                  | 0 (0.0)   | 1 (1.5)   | 0.31*  | 0.50  |
| 抗てんかん剤                     | 6 (8.8)   | 0 (0.0)   | 0.013* | 0.028 |
| 抗甲状腺剤                      | 1 (1.5)   | 0 (0.0)   | 0.32*  | 1.00  |
| 抗精神病薬                      | 1 (1.5)   | 0 (0.0)   | 0.32*  | 1.00  |
| 抗不安剤                       | 1 (1.5)   | 1 (1.5)   | 0.99*  | 1.00  |
| 甲状腺疾患治療薬                   | 2 (2.9)   | 2 (3.0)   | 0.99*  | 1.00  |
| 高カリウム血症改善剤                 | 3 (4.4)   | 1 (1.5)   | 0.32*  | 0.62  |
| 高コレステロール血症改善剤              | 2 (2.9)   | 0 (0.0)   | 0.16*  | 0.50  |
| 合成副腎皮質ホルモン剤                | 1 (1.5)   | 0 (0.0)   | 0.32*  | 1.00  |
| 持続性選択 H1 受容体拮抗・アレルギー性疾患治療剤 | 1 (1.5)   | 1 (1.5)   | 0.99*  | 1.00  |
| 徐放型鉄剤                      | 0 (0.0)   | 2 (3.0)   | 0.15*  | 0.24  |
| 徐放性カリウム剤                   | 0 (0.0)   | 1 (1.5)   | 0.31*  | 0.50  |
| 徐放性不整脈治療剤                  | 1 (1.5)   | 0 (0.0)   | 0.32*  | 1.00  |
| 消化管運動機能改善剤                 | 2 (2.9)   | 2 (3.0)   | 0.99*  | 1.00  |
| 消化管内ガス駆除剤                  | 1 (1.5)   | 0 (0.0)   | 0.32*  | 1.00  |
| 消化酵素製剤                     | 1 (1.5)   | 0 (0.0)   | 0.32*  | 1.00  |
| 消化性潰瘍治療剤                   | 3 (4.4)   | 0 (0.0)   | 0.08*  | 0.24  |
| 植物性緩下剤                     | 3 (4.4)   | 3 (4.5)   | 0.99*  | 1.00  |
| 心選択性 $\beta$ ブロッカー         | 1 (1.5)   | 0 (0.0)   | 0.32*  | 1.00  |
| 心不全治療薬                     | 4 (5.9)   | 0 (0.0)   | 0.044* | 0.12  |
| 睡眠導入剤                      | 3 (4.4)   | 1 (1.5)   | 0.32*  | 0.62  |
| 睡眠誘導剤                      | 2 (2.9)   | 0 (0.0)   | 0.16*  | 0.50  |
| 制酸・緩下剤                     | 15 (22.1) | 7 (10.4)  | 0.07   | 0.10  |
| 整腸剤                        | 0 (0.0)   | 1 (1.5)   | 0.31*  | 0.50  |
| 生菌製剤                       | 0 (0.0)   | 0 (0.0)   | -      | -     |

8. 薬剤情報  
併用薬 24 週時

|                                      |         |         |       |      |
|--------------------------------------|---------|---------|-------|------|
| 精神安定剤                                | 3 (4.4) | 0 (0.0) | 0.08* | 0.24 |
| 選択的 $\alpha$ 1A 遮断薬、前立腺肥大症に伴う排尿障害改善薬 | 1 (1.5) | 0 (0.0) | 0.32* | 1.00 |
| 前立腺肥大症に伴う排尿障害改善剤                     | 1 (1.5) | 0 (0.0) | 0.32* | 1.00 |
| 前立腺肥大症の排尿障害改善剤                       | 1 (1.5) | 2 (3.0) | 0.55* | 0.62 |
| 総合感冒剤                                | 1 (1.5) | 0 (0.0) | 0.32* | 1.00 |
| 対血管薬剤                                | 0 (0.0) | 1 (1.5) | 0.31* | 0.50 |
| 胆汁・腎排泄型 ACE 阻害剤                      | 1 (1.5) | 0 (0.0) | 0.32* | 1.00 |
| 長時間作用性吸入気管支拡張剤                       | 2 (2.9) | 1 (1.5) | 0.57* | 1.00 |
| 直接トロンビン阻害剤                           | 1 (1.5) | 0 (0.0) | 0.32* | 1.00 |
| 鎮咳剤                                  | 1 (1.5) | 0 (0.0) | 0.32* | 1.00 |
| 入眠剤                                  | 2 (2.9) | 0 (0.0) | 0.16* | 0.50 |
| 粘膜防御性胃炎・胃潰瘍治療剤                       | 0 (0.0) | 2 (3.0) | 0.15* | 0.24 |
| 脳循環・代謝改善剤                            | 0 (0.0) | 1 (1.5) | 0.31* | 0.50 |
| 排尿障害改善剤・降圧剤                          | 0 (0.0) | 1 (1.5) | 0.31* | 0.50 |
| 皮膚外用合成副腎皮質ホルモン剤                      | 1 (1.5) | 0 (0.0) | 0.32* | 1.00 |
| 頻脈性不整脈治療剤                            | 1 (1.5) | 0 (0.0) | 0.32* | 1.00 |
| 不整脈治療剤                               | 6 (8.8) | 6 (9.0) | 0.98  | 1.00 |
| 末梢性神経障害治療剤                           | 1 (1.5) | 1 (1.5) | 0.99* | 1.00 |
| 慢性腎不全用剤                              | 4 (5.9) | 1 (1.5) | 0.18* | 0.37 |
| 葉酸錠                                  | 0 (0.0) | 1 (1.5) | 0.31* | 0.50 |
| 喘息・COPD 治療配合剤                        | 0 (0.0) | 1 (1.5) | 0.31* | 0.50 |
| 疼痛治療剤                                | 1 (1.5) | 1 (1.5) | 0.99* | 1.00 |
| 解熱鎮痛剤                                | 1 (1.5) | 0 (0.0) | 0.32* | 1.00 |
| 不眠症治療薬                               | 1 (1.5) | 0 (0.0) | 0.32* | 1.00 |
| 骨粗鬆症治療剤                              | 1 (1.5) | 0 (0.0) | 0.32* | 1.00 |
| 皮膚外用合成副腎皮質ホルモン・抗生物質配合剤               | 1 (1.5) | 0 (0.0) | 0.32* | 1.00 |
| 漢方製剤                                 | 1 (1.5) | 0 (0.0) | 0.32* | 1.00 |
| 胃炎・消化性潰瘍治療剤                          | 0 (0.0) | 1 (1.5) | 0.31* | 0.50 |
| セフェム系抗生物質                            | 0 (0.0) | 0 (0.0) | -     | -    |
| 抗精神病剤                                | 1 (1.5) | 0 (0.0) | 0.32* | 1.00 |

$\chi$  二乗検定の P 値において、アスタリスクがついているものは、 $\chi$  二乗検定の実施要件を満たしていないため、結果に信頼性がないことを示します。
