# Supplementary material for: Topiroxostat versus allopurinol in patients with chronic heart failure complicated by hyperuricemia: A prospective, randomized, open-label, blinded-end-point clinical trial
Source: PubMed Central journal article supplement (PMC8789120; doi:10.1371/journal.pone.0261445), 2022-01-25
Supplement: pone.0261445.s009.pdf [file pone.0261445.s009.pdf]

高尿酸血症を合併した心不全患者における  
トピロキソスタットとアロプリノールのランダム化比較試験

The **E**ffect of **X**anthine Oxidase Inhibitor  
in **C**hron**I**c heart failure patients  
complica**TED** with hyper-**U**ricemi**A**  
**Excited-UA study**

追加解析報告書  
Ver 1.0

研究代表者：

獨協医科大学病院 心臓・血管内科 教授 井上 晃男

統計解析責任者：

株式会社 総合医科学研究所 医薬臨床研究支援事業部 山田 博万

追加解析報告書の作成・変更履歴

| 日付         | 版番号 | 変更点  |
|------------|-----|------|
| 2019/09/06 | 1.0 | 初版作成 |
|            |     |      |

## 目次

|                                                                |    |
|----------------------------------------------------------------|----|
| 1. FAS .....                                                   | 2  |
| 1.1. トロポニンI .....                                              | 2  |
| 表 1.1. [FAS] トロポニンI .....                                      | 2  |
| 1.2. 心房細動症例を除外した部分集団での FMD .....                               | 4  |
| 表 1.2. [FAS] 心房細動症例を除外した部分集団での FMD .....                       | 4  |
| 1.3. ベースライン時 EF45%未満の部分集団での FMD、8-OHdG、XOR 活性、尿酸 .....         | 5  |
| 表 1.3. [FAS] ベースライン時 EF45%未満の部分集団での FMD、8-OHdG、XOR 活性、尿酸 ..... | 5  |
| 1.4. ベースライン時 EF50%以上の部分集団での FMD、8-OHdG、XOR 活性、尿酸 .....         | 8  |
| 表 1.4. [FAS] ベースライン時 EF50%以上の部分集団での FMD、8-OHdG、XOR 活性、尿酸 ..... | 8  |
| 2. PPS .....                                                   | 11 |
| 2.1. トロポニンI .....                                              | 11 |
| 表 2.1. [PPS] トロポニンI .....                                      | 11 |
| 2.2. 心房細動症例を除外した部分集団での FMD .....                               | 13 |
| 表 2.2. [PPS] 心房細動症例を除外した部分集団での FMD .....                       | 13 |
| 2.3. ベースライン時 EF45%未満の部分集団での FMD、8-OHdG、XOR 活性、尿酸 .....         | 14 |
| 表 2.3. [PPS] ベースライン時 EF45%未満の部分集団での FMD、8-OHdG、XOR 活性、尿酸 ..... | 14 |
| 2.4. ベースライン時 EF50%以上の部分集団での FMD、8-OHdG、XOR 活性、尿酸 .....         | 17 |
| 表 2.4. [PPS] ベースライン時 EF50%以上の部分集団での FMD、8-OHdG、XOR 活性、尿酸 ..... | 17 |

1. FAS  
1.1. トロポニン I

1. FAS  
1.1. トロポニン I

表 1.1. [FAS] トロポニン I

| 変数                           | 観察ポイント | 統計量                       | トピロキソスタット群                | アロプリノール群           | 群間比較 P 値          |       |
|------------------------------|--------|---------------------------|---------------------------|--------------------|-------------------|-------|
| hs トロポニン I (pg/mL)           | 測定値    | 0 週                       | n                         | 70                 | 70                |       |
|                              |        |                           | Mean ± SD                 | 23.1 ± 39.1        | 13.4 ± 19.9       | 0.07  |
|                              |        |                           | Median [Q1, Q3]           | 7.4 [3.9, 17.1]    | 6.8 [4.4, 14.6]   | 0.63  |
|                              |        |                           | Min, Max                  | 1.2, 158.8         | 1.4, 132.3        |       |
|                              |        | 12 週                      | n                         | 65                 | 68                |       |
|                              |        |                           | Mean ± SD                 | 23.3 ± 47.3        | 15.8 ± 28.5       | 0.27  |
|                              |        |                           | Median [Q1, Q3]           | 7.3 [3.9, 16.2]    | 6.6 [4.2, 19.0]   | 0.89  |
|                              |        |                           | Min, Max                  | 1.5, 294.8         | 1.1, 197.9        |       |
|                              |        | 24 週                      | n                         | 66                 | 66                |       |
|                              |        |                           | Mean ± SD                 | 18.8 ± 30.5        | 16.7 ± 46.5       | 0.76  |
|                              |        |                           | Median [Q1, Q3]           | 7.9 [4.5, 15.9]    | 6.5 [4.0, 13.1]   | 0.45  |
|                              |        |                           | Min, Max                  | 1.2, 145.0         | 1.5, 375.3        |       |
|                              | 変化量    | 12 週                      | n                         | 65                 | 68                |       |
|                              |        |                           | Mean ± SD                 | 3.1 ± 41.2         | 2.5 ± 24.2        | 0.92  |
|                              |        |                           | Median [Q1, Q3]           | 0.2 [-1.4, 2.3]    | 0.1 [-1.1, 1.4]   | 0.75  |
|                              |        |                           | Min, Max                  | -154.4, 287.7      | -40.7, 190.4      |       |
|                              |        |                           | One-sample t-test         | 0.55               | 0.40              |       |
|                              |        |                           | Wilcoxon signed-rank test | 0.39               | 0.56              |       |
|                              |        | 24 週                      | n                         | 66                 | 66                |       |
|                              |        |                           | Mean ± SD                 | 1.1 ± 12.0         | 4.7 ± 42.3        | 0.50  |
|                              |        |                           | Median [Q1, Q3]           | 0.7 [-0.8, 2.6]    | -0.3 [-2.1, 1.1]  | 0.032 |
|                              |        |                           | Min, Max                  | -68.9, 42.3        | -18.4, 340.7      |       |
|                              |        |                           | One-sample t-test         | 0.46               | 0.37              |       |
|                              |        |                           | Wilcoxon signed-rank test | 0.021              | 0.54              |       |
| 変化率                          | 12 週   | n                         | 65                        | 68                 |                   |       |
|                              |        | Mean ± SD                 | 70.8 ± 502.9              | 42.1 ± 308.9       | 0.69              |       |
|                              |        | Median [Q1, Q3]           | 4.0 [-12.8, 33.3]         | 1.3 [-18.0, 24.4]  | 0.39              |       |
|                              |        | Min, Max                  | -97.2, 4052.1             | -44.9, 2538.7      |                   |       |
|                              |        | One-sample t-test         | 0.26                      | 0.26               |                   |       |
|                              |        | Wilcoxon signed-rank test | 0.09                      | 0.37               |                   |       |
|                              | 24 週   | n                         | 66                        | 66                 |                   |       |
|                              |        | Mean ± SD                 | 21.0 ± 46.2               | 19.7 ± 125.7       | 0.94              |       |
|                              |        | Median [Q1, Q3]           | 17.2 [-9.2, 43.2]         | -5.7 [-17.2, 29.4] | 0.042             |       |
|                              |        | Min, Max                  | -89.7, 188.0              | -53.6, 984.7       |                   |       |
|                              |        | One-sample t-test         | <0.001                    | 0.21               |                   |       |
|                              |        | Wilcoxon signed-rank test | <0.001                    | 0.35               |                   |       |
| 対数変換 hs トロポニン I (ln (pg/mL)) | 測定値    | 0 週                       | n                         | 70                 | 70                |       |
|                              |        |                           | Mean ± SD                 | 2.24 ± 1.25        | 2.07 ± 0.94       | 0.38  |
|                              |        |                           | Median [Q1, Q3]           | 1.99 [1.36, 2.84]  | 1.91 [1.48, 2.68] | 0.63  |
|                              |        |                           | Min, Max                  | 0.18, 5.07         | 0.34, 4.89        |       |
|                              | 12 週   | n                         | 65                        | 68                 |                   |       |
|                              |        | Mean ± SD                 | 2.19 ± 1.23               | 2.11 ± 1.03        | 0.68              |       |

1. FAS  
1.1. トロポニンI

|                           |      |                           |                           |                       |                     |       |
|---------------------------|------|---------------------------|---------------------------|-----------------------|---------------------|-------|
|                           |      | Median [Q1, Q3]           | 1.99 [1.36, 2.79]         | 1.88 [1.42, 2.94]     | 0.89                |       |
|                           |      | Min, Max                  | 0.41, 5.69                | 0.10, 5.29            |                     |       |
|                           | 24 週 | n                         | 66                        | 66                    |                     |       |
|                           |      | Mean ± SD                 | 2.20 ± 1.12               | 2.07 ± 0.98           | 0.46                |       |
|                           |      | Median [Q1, Q3]           | 2.06 [1.50, 2.77]         | 1.87 [1.39, 2.57]     | 0.45                |       |
|                           |      | Min, Max                  | 0.18, 4.98                | 0.41, 5.93            |                     |       |
|                           | 変化量  | 12 週                      | n                         | 65                    | 68                  |       |
|                           |      |                           | Mean ± SD                 | 0.04 ± 0.73           | 0.05 ± 0.49         | 0.93  |
|                           |      |                           | Median [Q1, Q3]           | 0.04 [-0.14, 0.29]    | 0.01 [-0.20, 0.22]  | 0.39  |
|                           |      |                           | Min, Max                  | -3.59, 3.73           | -0.60, 3.27         |       |
|                           |      |                           | One-sample t-test         | 0.62                  | 0.36                |       |
|                           |      |                           | Wilcoxon signed-rank test | 0.20                  | 0.79                |       |
|                           |      | 24 週                      | n                         | 66                    | 66                  |       |
|                           |      |                           | Mean ± SD                 | 0.11 ± 0.46           | 0.03 ± 0.46         | 0.30  |
|                           |      |                           | Median [Q1, Q3]           | 0.16 [-0.10, 0.36]    | -0.06 [-0.19, 0.26] | 0.042 |
|                           |      |                           | Min, Max                  | -2.27, 1.06           | -0.77, 2.38         |       |
|                           |      |                           | One-sample t-test         | 0.06                  | 0.65                |       |
|                           |      |                           | Wilcoxon signed-rank test | 0.003                 | 0.85                |       |
|                           | 変化率  | 12 週                      | n                         | 65                    | 68                  |       |
|                           |      |                           | Mean ± SD                 | 11.09 ± 43.38         | 2.93 ± 31.60        | 0.22  |
| Median [Q1, Q3]           |      |                           | 1.48 [-7.97, 15.57]       | 0.70 [-10.28, 11.34]  | 0.33                |       |
| Min, Max                  |      |                           | -70.76, 191.04            | -82.04, 162.43        |                     |       |
| One-sample t-test         |      |                           | 0.043                     | 0.45                  |                     |       |
| Wilcoxon signed-rank test |      |                           | 0.18                      | 0.83                  |                     |       |
| 24 週                      |      | n                         | 66                        | 66                    |                     |       |
|                           |      | Mean ± SD                 | 16.41 ± 59.72             | 5.92 ± 31.79          | 0.21                |       |
|                           |      | Median [Q1, Q3]           | 7.63 [-5.17, 19.86]       | -2.92 [-10.48, 16.91] | 0.08                |       |
|                           |      | Min, Max                  | -92.56, 424.08            | -44.54, 147.54        |                     |       |
|                           |      | One-sample t-test         | 0.029                     | 0.14                  |                     |       |
|                           |      | Wilcoxon signed-rank test | 0.002                     | 0.54                  |                     |       |

1. FAS

1.2. 心房細動症例を除外した部分集団での FMD

1.2. 心房細動症例を除外した部分集団での FMD

除外した心房細動症例の定義は、心不全の原疾患もしくは合併症に心房細動があり、かつ登録時の心電図検査でも心房細動の所見があった症例、とした。

表 1.2. [FAS] 心房細動症例を除外した部分集団での FMD

| 変数      |     | 観察<br>ポイント | 統計量                       | トピロキソスタット群         | アロプリノール群            | 群間比較<br>P 値 |
|---------|-----|------------|---------------------------|--------------------|---------------------|-------------|
| FMD (%) | 測定値 | 0 週        | n                         | 32                 | 33                  |             |
|         |     |            | Mean ± SD                 | 4.88 ± 2.38        | 4.73 ± 2.29         | 0.80        |
|         |     |            | Median [Q1, Q3]           | 4.65 [3.00, 6.00]  | 4.70 [3.40, 5.70]   | 0.94        |
|         |     |            | Min, Max                  | 1.70, 11.50        | 1.10, 10.80         |             |
|         |     | 24 週       | n                         | 31                 | 31                  |             |
|         |     |            | Mean ± SD                 | 4.98 ± 2.45        | 4.53 ± 1.71         | 0.40        |
|         |     |            | Median [Q1, Q3]           | 4.00 [3.50, 6.10]  | 4.20 [3.40, 5.60]   | 0.69        |
|         |     |            | Min, Max                  | 1.50, 12.60        | 1.60, 9.20          |             |
|         | 変化量 | 24 週       | n                         | 30                 | 30                  |             |
|         |     |            | Mean ± SD                 | -0.01 ± 1.40       | -0.22 ± 1.53        | 0.59        |
|         |     |            | Median [Q1, Q3]           | 0.10 [-0.80, 1.00] | -0.10 [-0.90, 0.60] | 0.52        |
|         |     |            | Min, Max                  | -4.30, 3.00        | -5.60, 2.40         |             |
|         |     |            | One-sample t-test         | 0.97               | 0.45                |             |
|         |     |            | Wilcoxon signed-rank test | 0.83               | 0.53                |             |

## 1.3. ベースライン時 EF45%未満の部分集団での FMD、8-OHdG、XOR 活性、尿酸

表 1.3. [FAS] ベースライン時 EF45%未満の部分集団での FMD、8-OHdG、XOR 活性、尿酸

| 変数                   |      | 観察<br>ポイント      | 統計量                       | トピロキシスタット群         | アロプリノール群            | 群間比較<br>P 値 |
|----------------------|------|-----------------|---------------------------|--------------------|---------------------|-------------|
| FMD (%)              | 測定値  | 0 週             | n                         | 14                 | 15                  |             |
|                      |      |                 | Mean ± SD                 | 4.90 ± 3.00        | 5.03 ± 2.42         | 0.90        |
|                      |      |                 | Median [Q1, Q3]           | 3.10 [2.90, 7.50]  | 4.50 [4.00, 6.70]   | 0.53        |
|                      |      |                 | Min, Max                  | 1.90, 11.50        | 1.10, 9.80          |             |
|                      |      | 24 週            | n                         | 13                 | 15                  |             |
|                      |      |                 | Mean ± SD                 | 5.68 ± 2.98        | 4.86 ± 1.89         | 0.38        |
|                      |      |                 | Median [Q1, Q3]           | 4.70 [4.00, 6.90]  | 4.10 [3.60, 6.00]   | 0.45        |
|                      |      |                 | Min, Max                  | 1.50, 12.60        | 2.80, 9.20          |             |
|                      | 変化量  | 24 週            | n                         | 12                 | 14                  |             |
|                      |      |                 | Mean ± SD                 | 0.55 ± 1.13        | 0.23 ± 1.35         | 0.52        |
|                      |      |                 | Median [Q1, Q3]           | 0.65 [-0.30, 1.10] | -0.05 [-0.90, 1.60] | 0.50        |
|                      |      |                 | Min, Max                  | -1.30, 3.00        | -1.60, 2.40         |             |
|                      |      |                 | One-sample t-test         | 0.12               | 0.54                |             |
|                      |      |                 | Wilcoxon signed-rank test | 0.13               | 0.62                |             |
| 8-OHdG<br>(ng/mg・Cr) | 測定値  | 0 週             | n                         | 19                 | 20                  |             |
|                      |      |                 | Mean ± SD                 | 8.4 ± 3.6          | 7.2 ± 2.9           | 0.24        |
|                      |      |                 | Median [Q1, Q3]           | 7.3 [5.4, 11.2]    | 6.6 [5.5, 8.5]      | 0.29        |
|                      |      |                 | Min, Max                  | 3.4, 15.7          | 2.8, 13.5           |             |
|                      |      | 12 週            | n                         | 17                 | 20                  |             |
|                      |      |                 | Mean ± SD                 | 9.0 ± 3.3          | 8.5 ± 2.8           | 0.60        |
|                      |      |                 | Median [Q1, Q3]           | 8.4 [7.3, 10.3]    | 8.6 [5.8, 11.0]     | 0.90        |
|                      |      |                 | Min, Max                  | 3.6, 16.8          | 4.3, 13.6           |             |
|                      |      | 24 週            | n                         | 15                 | 19                  |             |
|                      |      |                 | Mean ± SD                 | 8.6 ± 3.9          | 10.0 ± 2.1          | 0.19        |
|                      |      |                 | Median [Q1, Q3]           | 8.5 [6.0, 9.6]     | 10.5 [8.6, 11.8]    | 0.039       |
|                      |      |                 | Min, Max                  | 4.1, 20.1          | 5.9, 12.7           |             |
|                      | 変化量  | 12 週            | n                         | 17                 | 20                  |             |
|                      |      |                 | Mean ± SD                 | 0.4 ± 2.9          | 1.3 ± 3.3           | 0.37        |
|                      |      |                 | Median [Q1, Q3]           | 1.7 [-1.0, 2.3]    | 2.0 [-1.3, 4.2]     | 0.34        |
|                      |      |                 | Min, Max                  | -5.8, 3.6          | -5.5, 6.4           |             |
|                      |      |                 | One-sample t-test         | 0.60               | 0.09                |             |
|                      |      |                 | Wilcoxon signed-rank test | 0.40               | 0.10                |             |
|                      |      | 24 週            | n                         | 15                 | 19                  |             |
|                      |      |                 | Mean ± SD                 | 0.4 ± 3.8          | 2.8 ± 3.1           | 0.05        |
|                      |      |                 | Median [Q1, Q3]           | 1.3 [-1.2, 2.6]    | 2.9 [1.0, 4.6]      | 0.08        |
|                      |      |                 | Min, Max                  | -9.9, 6.2          | -2.3, 8.3           |             |
| 変化率                  | 12 週 | n               | 17                        | 20                 |                     |             |
|                      |      | Mean ± SD       | 14.2 ± 37.8               | 32.1 ± 55.5        | 0.27                |             |
|                      |      | Median [Q1, Q3] | 20.0 [-12.0, 31.5]        | 31.1 [-18.6, 74.0] | 0.40                |             |
|                      |      | Min, Max        | -61.7, 81.8               | -43.0, 127.8       |                     |             |
| One-sample t-test    | 0.14 | 0.018           |                           |                    |                     |             |

## 1. FAS

## 1.3. ベースライン時 EF45%未満の部分集団での FMD、8-OHdG、XOR 活性、尿酸

|                                              |     |      |                           |                     |                      |       |
|----------------------------------------------|-----|------|---------------------------|---------------------|----------------------|-------|
|                                              |     |      | Wilcoxon signed-rank test | 0.12                | 0.036                |       |
|                                              |     | 24 週 | n                         | 15                  | 19                   |       |
|                                              |     |      | Mean $\pm$ SD             | 17.9 $\pm$ 55.5     | 59.7 $\pm$ 77.5      | 0.09  |
|                                              |     |      | Median [Q1, Q3]           | 15.7 [-16.4, 29.5]  | 51.5 [16.2, 63.9]    | 0.022 |
|                                              |     |      | Min, Max                  | -70.7, 182.4        | -18.0, 296.4         |       |
|                                              |     |      | One-sample t-test         | 0.23                | 0.004                |       |
|                                              |     |      | Wilcoxon signed-rank test | 0.23                | <0.001               |       |
| XOR 活性<br>(pmol/h/mL<br>plasma)              | 測定値 | 0 週  | n                         | 19                  | 20                   |       |
|                                              |     |      | Mean $\pm$ SD             | 48.1 $\pm$ 39.9     | 44.7 $\pm$ 46.9      | 0.81  |
|                                              |     |      | Median [Q1, Q3]           | 33.5 [22.5, 67.8]   | 30.9 [16.7, 49.6]    | 0.42  |
|                                              |     |      | Min, Max                  | 13.6, 170.0         | 6.7, 201.0           |       |
|                                              |     | 24 週 | n                         | 15                  | 19                   |       |
|                                              |     |      | Mean $\pm$ SD             | 34.1 $\pm$ 61.3     | 28.0 $\pm$ 54.4      | 0.76  |
|                                              |     |      | Median [Q1, Q3]           | 17.3 [9.2, 20.6]    | 9.2 [6.7, 27.8]      | 0.19  |
|                                              |     |      | Min, Max                  | 6.7, 250.0          | 6.7, 246.0           |       |
|                                              | 変化量 | 24 週 | n                         | 15                  | 19                   |       |
|                                              |     |      | Mean $\pm$ SD             | -16.4 $\pm$ 64.7    | -18.7 $\pm$ 53.8     | 0.91  |
|                                              |     |      | Median [Q1, Q3]           | -15.9 [-42.1, -3.3] | -19.2 [-28.8, -5.7]  | 0.96  |
|                                              |     |      | Min, Max                  | -110.2, 182.2       | -174.1, 138.0        |       |
|                                              |     | 24 週 | n                         | 15                  | 19                   |       |
|                                              |     |      | Mean $\pm$ SD             | -30.6 $\pm$ 87.4    | -45.8 $\pm$ 47.8     | 0.52  |
|                                              |     |      | Median [Q1, Q3]           | -59.8 [-75.5, -9.3] | -56.1 [-70.7, -40.4] | 0.84  |
|                                              |     |      | Min, Max                  | -84.0, 268.7        | -86.6, 127.8         |       |
| 対数変換 XOR<br>活性 (ln<br>(pmol/h/mL<br>plasma)) | 測定値 | 0 週  | n                         | 19                  | 20                   |       |
|                                              |     |      | Mean $\pm$ SD             | 3.6 $\pm$ 0.7       | 3.4 $\pm$ 0.9        | 0.39  |
|                                              |     |      | Median [Q1, Q3]           | 3.5 [3.1, 4.2]      | 3.4 [2.8, 3.9]       | 0.42  |
|                                              |     |      | Min, Max                  | 2.6, 5.1            | 1.9, 5.3             |       |
|                                              |     | 24 週 | n                         | 15                  | 19                   |       |
|                                              |     |      | Mean $\pm$ SD             | 2.9 $\pm$ 0.9       | 2.6 $\pm$ 1.0        | 0.42  |
|                                              |     |      | Median [Q1, Q3]           | 2.9 [2.2, 3.0]      | 2.2 [1.9, 3.3]       | 0.19  |
|                                              |     |      | Min, Max                  | 1.9, 5.5            | 1.9, 5.5             |       |
|                                              | 変化量 | 24 週 | n                         | 15                  | 19                   |       |
|                                              |     |      | Mean $\pm$ SD             | -0.7 $\pm$ 0.8      | -0.8 $\pm$ 0.7       | 0.71  |
|                                              |     |      | Median [Q1, Q3]           | -0.9 [-1.4, -0.1]   | -0.8 [-1.2, -0.5]    | 0.84  |
|                                              |     |      | Min, Max                  | -1.8, 1.3           | -2.0, 0.8            |       |
|                                              |     | 24 週 | n                         | 15                  | 19                   |       |
|                                              |     |      | Mean $\pm$ SD             | -20.2 $\pm$ 20.0    | -24.6 $\pm$ 16.6     | 0.49  |
|                                              |     |      | Median [Q1, Q3]           | -24.2 [-32.7, -3.1] | -30.2 [-35.7, -17.4] | 0.45  |
|                                              |     |      | Min, Max                  | -44.1, 30.9         | -46.5, 17.6          |       |
| 血中尿酸値<br>(mg/dL)                             | 測定値 | 0 週  | n                         | 19                  | 20                   |       |
|                                              |     |      | Mean $\pm$ SD             | 8.6 $\pm$ 1.4       | 8.5 $\pm$ 1.4        | 0.89  |

## 1. FAS

## 1.3. ベースライン時 EF45%未満の部分集団での FMD、8-OHdG、XOR 活性、尿酸

|                           |                 |                 |                           |                   |                   |      |
|---------------------------|-----------------|-----------------|---------------------------|-------------------|-------------------|------|
|                           |                 | Median [Q1, Q3] | 8.3 [7.2, 10.1]           | 8.5 [7.6, 8.9]    | 0.98              |      |
|                           |                 | Min, Max        | 6.9, 11.9                 | 6.7, 11.6         |                   |      |
|                           |                 | 12 週            | n                         | 18                | 20                |      |
|                           |                 | Mean ± SD       | 5.8 ± 1.2                 | 6.0 ± 0.8         | 0.55              |      |
|                           |                 | Median [Q1, Q3] | 6.0 [5.2, 6.7]            | 6.1 [5.8, 6.5]    | 0.56              |      |
|                           |                 | Min, Max        | 3.9, 8.7                  | 4.5, 7.4          |                   |      |
|                           |                 | 24 週            | n                         | 15                | 19                |      |
|                           |                 | Mean ± SD       | 6.2 ± 1.3                 | 6.1 ± 1.1         | 0.81              |      |
|                           | Median [Q1, Q3] | 6.3 [4.7, 7.3]  | 6.0 [5.2, 6.5]            | 0.75              |                   |      |
|                           | Min, Max        | 4.5, 7.8        | 4.5, 8.9                  |                   |                   |      |
|                           | 変化量             | 12 週            | n                         | 18                | 20                |      |
|                           |                 |                 | Mean ± SD                 | -2.6 ± 1.2        | -2.5 ± 1.2        | 0.85 |
|                           |                 |                 | Median [Q1, Q3]           | -2.3 [-3.5, -1.6] | -2.3 [-2.8, -1.8] | 0.91 |
|                           |                 |                 | Min, Max                  | -5.3, -1.2        | -5.0, -1.0        |      |
|                           |                 |                 | One-sample t-test         | <0.001            | <0.001            |      |
|                           |                 |                 | Wilcoxon signed-rank test | <0.001            | <0.001            |      |
|                           |                 | 24 週            | n                         | 15                | 19                |      |
|                           |                 |                 | Mean ± SD                 | -2.2 ± 1.3        | -2.3 ± 1.5        | 0.81 |
|                           |                 |                 | Median [Q1, Q3]           | -2.5 [-2.8, -0.7] | -2.2 [-3.1, -1.6] | 0.94 |
| Min, Max                  |                 |                 | -4.6, 0.0                 | -5.7, 1.2         |                   |      |
| One-sample t-test         |                 |                 | <0.001                    | <0.001            |                   |      |
| Wilcoxon signed-rank test | <0.001          | <0.001          |                           |                   |                   |      |



## 1. FAS

## 1.4. ベースライン時 EF50%以上の部分集団での FMD、8-OHdG、XOR 活性、尿酸

## 1.4. ベースライン時 EF50%以上の部分集団での FMD、8-OHdG、XOR 活性、尿酸

表 1.4. [FAS] ベースライン時 EF50%以上の部分集団での FMD、8-OHdG、XOR 活性、尿酸

| 変数                   |      | 観察<br>ポイント        | 統計量                       | トピロキシostat群        | アロプリノール群            | 群間比較<br>P 値 |
|----------------------|------|-------------------|---------------------------|--------------------|---------------------|-------------|
| FMD (%)              | 測定値  | 0 週               | n                         | 32                 | 28                  |             |
|                      |      |                   | Mean ± SD                 | 4.67 ± 2.20        | 4.25 ± 2.00         | 0.44        |
|                      |      |                   | Median [Q1, Q3]           | 4.65 [3.10, 5.65]  | 4.50 [2.65, 5.15]   | 0.53        |
|                      |      |                   | Min, Max                  | 1.10, 10.50        | 1.30, 10.80         |             |
|                      |      | 24 週              | n                         | 32                 | 26                  |             |
|                      |      |                   | Mean ± SD                 | 4.61 ± 2.21        | 3.79 ± 1.34         | 0.10        |
|                      |      |                   | Median [Q1, Q3]           | 3.95 [3.15, 5.85]  | 3.80 [2.90, 4.70]   | 0.26        |
|                      |      |                   | Min, Max                  | 1.30, 10.70        | 1.20, 6.20          |             |
|                      | 変化量  | 24 週              | n                         | 32                 | 26                  |             |
|                      |      |                   | Mean ± SD                 | -0.06 ± 2.05       | -0.65 ± 1.43        | 0.22        |
|                      |      |                   | Median [Q1, Q3]           | 0.25 [-1.00, 1.20] | -0.50 [-0.90, 0.10] | 0.09        |
|                      |      |                   | Min, Max                  | -6.60, 4.40        | -5.60, 1.30         |             |
|                      |      |                   | One-sample t-test         | 0.87               | 0.030               |             |
|                      |      |                   | Wilcoxon signed-rank test | 0.69               | 0.020               |             |
| 8-OHdG<br>(ng/mg・Cr) | 測定値  | 0 週               | n                         | 44                 | 43                  |             |
|                      |      |                   | Mean ± SD                 | 7.3 ± 3.4          | 6.8 ± 3.4           | 0.45        |
|                      |      |                   | Median [Q1, Q3]           | 6.8 [4.9, 8.3]     | 6.0 [4.3, 8.3]      | 0.32        |
|                      |      |                   | Min, Max                  | 2.9, 22.3          | 2.1, 19.9           |             |
|                      |      | 12 週              | n                         | 41                 | 41                  |             |
|                      |      |                   | Mean ± SD                 | 9.1 ± 4.1          | 10.6 ± 6.2          | 0.20        |
|                      |      |                   | Median [Q1, Q3]           | 8.2 [6.5, 11.0]    | 9.1 [7.0, 12.3]     | 0.20        |
|                      |      |                   | Min, Max                  | 4.1, 20.7          | 4.6, 37.9           |             |
|                      |      | 24 週              | n                         | 44                 | 40                  |             |
|                      |      |                   | Mean ± SD                 | 8.7 ± 4.3          | 10.1 ± 4.7          | 0.15        |
|                      |      |                   | Median [Q1, Q3]           | 8.3 [5.9, 9.9]     | 8.7 [7.4, 12.1]     | 0.11        |
|                      |      |                   | Min, Max                  | 1.5, 24.9          | 3.6, 25.6           |             |
|                      | 変化量  | 12 週              | n                         | 41                 | 41                  |             |
|                      |      |                   | Mean ± SD                 | 1.6 ± 3.6          | 3.7 ± 4.7           | 0.028       |
|                      |      |                   | Median [Q1, Q3]           | 1.1 [-0.2, 2.9]    | 2.6 [0.9, 4.7]      | 0.010       |
|                      |      |                   | Min, Max                  | -6.5, 12.7         | -2.6, 27.3          |             |
|                      |      |                   | One-sample t-test         | 0.006              | <0.001              |             |
|                      |      |                   | Wilcoxon signed-rank test | 0.001              | <0.001              |             |
|                      |      | 24 週              | n                         | 44                 | 40                  |             |
|                      |      |                   | Mean ± SD                 | 1.3 ± 3.4          | 3.4 ± 3.2           | 0.005       |
|                      |      |                   | Median [Q1, Q3]           | 1.2 [-0.4, 2.6]    | 3.2 [1.4, 5.4]      | 0.004       |
|                      |      |                   | Min, Max                  | -7.3, 11.9         | -1.8, 10.6          |             |
|                      |      |                   | One-sample t-test         | 0.011              | <0.001              |             |
|                      |      |                   | Wilcoxon signed-rank test | 0.005              | <0.001              |             |
| 変化率                  | 12 週 | n                 | 41                        | 41                 |                     |             |
|                      |      | Mean ± SD         | 29.9 ± 50.2               | 64.6 ± 70.5        | 0.012               |             |
|                      |      | Median [Q1, Q3]   | 18.0 [-1.8, 50.9]         | 49.0 [13.2, 85.7]  | 0.010               |             |
|                      |      | Min, Max          | -46.7, 158.8              | -27.1, 275.0       |                     |             |
|                      |      | One-sample t-test | <0.001                    | <0.001             |                     |             |

## 1. FAS

## 1.4. ベースライン時 EF50%以上の部分集団での FMD、8-OHdG、XOR 活性、尿酸

|                                              |     |      |                           |                         |                      |        |  |
|----------------------------------------------|-----|------|---------------------------|-------------------------|----------------------|--------|--|
|                                              |     |      | Wilcoxon signed-rank test | <0.001                  | <0.001               |        |  |
|                                              |     | 24 週 | n                         | 44                      | 40                   |        |  |
|                                              |     |      | Mean ±SD                  | 24.3±47.0               | 64.0±64.1            | 0.002  |  |
|                                              |     |      | Median [Q1, Q3]           | 15.6 [-5.4, 44.1]       | 42.9 [20.5, 109.0]   | 0.004  |  |
|                                              |     |      | Min, Max                  | -83.0, 151.2            | -25.0, 195.6         |        |  |
|                                              |     |      | One-sample t-test         | 0.001                   | <0.001               |        |  |
|                                              |     |      | Wilcoxon signed-rank test | 0.001                   | <0.001               |        |  |
| XOR 活性<br>(pmol/h/mL<br>plasma)              | 測定値 | 0 週  | n                         | 44                      | 43                   |        |  |
|                                              |     |      | Mean ±SD                  | 59.0±59.1               | 77.6±154.5           | 0.46   |  |
|                                              |     |      | Median [Q1, Q3]           | 40.5 [26.9, 61.4]       | 28.9 [17.8, 57.5]    | 0.11   |  |
|                                              |     |      | Min, Max                  | 16.3, 342.0             | 7.5, 946.0           |        |  |
|                                              |     | 24 週 | n                         | 44                      | 40                   |        |  |
|                                              |     |      | Mean ±SD                  | 19.0±18.7               | 29.1±41.5            | 0.15   |  |
|                                              | 変化量 | 24 週 | n                         | 44                      | 40                   |        |  |
|                                              |     |      | Mean ±SD                  | -40.0±56.3              | -53.0±141.1          | 0.57   |  |
|                                              |     |      | Median [Q1, Q3]           | -22.3 [-45.0,<br>-13.7] | -18.0 [-46.0, -8.2]  | 0.32   |  |
|                                              |     |      | Min, Max                  | -334.9, 15.9            | -868.1, 65.0         |        |  |
|                                              |     | 24 週 | One-sample t-test         | <0.001                  | 0.022                |        |  |
|                                              |     |      | Wilcoxon signed-rank test | <0.001                  | <0.001               |        |  |
|                                              | 変化率 | 24 週 | n                         | 44                      | 40                   |        |  |
|                                              |     |      | Mean ±SD                  | -59.0±33.7              | -43.0±47.6           | 0.08   |  |
|                                              |     |      | Median [Q1, Q3]           | -69.8 [-81.6,<br>-51.6] | -52.6 [-72.0, -36.5] | 0.025  |  |
|                                              |     |      | Min, Max                  | -97.9, 59.6             | -91.8, 130.0         |        |  |
|                                              |     | 24 週 | One-sample t-test         | <0.001                  | <0.001               |        |  |
|                                              |     |      | Wilcoxon signed-rank test | <0.001                  | <0.001               |        |  |
| 対数変換 XOR<br>活性 (ln<br>(pmol/h/mL<br>plasma)) | 測定値 | 0 週  | n                         | 44                      | 43                   |        |  |
|                                              |     |      | Mean ±SD                  | 3.8±0.7                 | 3.6±1.1              | 0.34   |  |
|                                              |     |      | Median [Q1, Q3]           | 3.7 [3.3, 4.1]          | 3.4 [2.9, 4.1]       | 0.11   |  |
|                                              |     |      | Min, Max                  | 2.8, 5.8                | 2.0, 6.9             |        |  |
|                                              |     | 24 週 | n                         | 44                      | 40                   |        |  |
|                                              |     |      | Mean ±SD                  | 2.6±0.8                 | 2.8±0.9              | 0.19   |  |
|                                              | 変化量 | 24 週 | n                         | 44                      | 40                   |        |  |
|                                              |     |      | Mean ±SD                  | -1.2±0.8                | -0.8±0.7             | 0.036  |  |
|                                              |     |      | Median [Q1, Q3]           | -1.2 [-1.7, -0.7]       | -0.7 [-1.3, -0.5]    | 0.025  |  |
|                                              |     |      | Min, Max                  | -3.9, 0.5               | -2.5, 0.8            |        |  |
|                                              |     | 24 週 | One-sample t-test         | <0.001                  | <0.001               |        |  |
|                                              |     |      | Wilcoxon signed-rank test | <0.001                  | <0.001               |        |  |
|                                              | 変化率 | 24 週 | n                         | 44                      | 40                   |        |  |
|                                              |     |      | Mean ±SD                  | -30.7±18.7              | -20.9±18.4           | 0.018  |  |
|                                              |     |      | Median [Q1, Q3]           | -34.8 [-44.4,<br>-18.4] | -23.2 [-33.3, -13.7] | 0.017  |  |
|                                              |     |      | Min, Max                  | -66.3, 14.2             | -55.8, 26.6          |        |  |
|                                              |     |      |                           | One-sample t-test       | <0.001               | <0.001 |  |

## 1. FAS

## 1.4. ベースライン時 EF50%以上の部分集団での FMD、8-OHdG、XOR 活性、尿酸

|                  |     |                           |                           |                   |                   |       |
|------------------|-----|---------------------------|---------------------------|-------------------|-------------------|-------|
|                  |     |                           | Wilcoxon signed-rank test | <0.001            | <0.001            |       |
| 血中尿酸値<br>(mg/dL) | 測定値 | 0 週                       | n                         | 43                | 42                |       |
|                  |     |                           | Mean ± SD                 | 8.2 ± 1.4         | 8.2 ± 1.5         | 0.87  |
|                  |     |                           | Median [Q1, Q3]           | 8.0 [7.2, 9.2]    | 8.0 [7.3, 8.7]    | 0.89  |
|                  |     |                           | Min, Max                  | 5.7, 11.6         | 5.4, 12.4         |       |
|                  |     | 12 週                      | n                         | 44                | 43                |       |
|                  |     |                           | Mean ± SD                 | 5.2 ± 1.0         | 5.9 ± 1.2         | 0.008 |
|                  |     |                           | Median [Q1, Q3]           | 5.4 [4.8, 5.8]    | 5.9 [5.1, 6.5]    | 0.013 |
|                  |     |                           | Min, Max                  | 3.2, 7.6          | 3.6, 9.0          |       |
|                  |     | 24 週                      | n                         | 44                | 41                |       |
|                  |     |                           | Mean ± SD                 | 5.3 ± 1.1         | 5.9 ± 1.2         | 0.017 |
|                  |     |                           | Median [Q1, Q3]           | 5.3 [4.5, 6.1]    | 6.0 [5.0, 6.4]    | 0.023 |
|                  |     |                           | Min, Max                  | 3.1, 7.5          | 3.1, 9.7          |       |
|                  | 変化量 | 12 週                      | n                         | 43                | 42                |       |
|                  |     |                           | Mean ± SD                 | -3.0 ± 1.2        | -2.3 ± 1.4        | 0.013 |
|                  |     |                           | Median [Q1, Q3]           | -2.7 [-3.8, -2.2] | -2.0 [-3.0, -1.4] | 0.010 |
|                  |     |                           | Min, Max                  | -5.5, -0.9        | -6.2, 0.7         |       |
|                  |     |                           | One-sample t-test         | <0.001            | <0.001            |       |
|                  |     |                           | Wilcoxon signed-rank test | <0.001            | <0.001            |       |
| 24 週             |     | n                         | 43                        | 40                |                   |       |
|                  |     | Mean ± SD                 | -2.9 ± 1.5                | -2.3 ± 1.3        | 0.030             |       |
|                  |     | Median [Q1, Q3]           | -3.1 [-4.0, -1.8]         | -1.9 [-3.2, -1.3] | 0.013             |       |
|                  |     | Min, Max                  | -6.6, 0.6                 | -5.7, 0.5         |                   |       |
|                  |     | One-sample t-test         | <0.001                    | <0.001            |                   |       |
|                  |     | Wilcoxon signed-rank test | <0.001                    | <0.001            |                   |       |

2. PPS  
2.1. トロポニン I

2. PPS  
2.1. トロポニン I

表 2.1. [PPS] トロポニン I

| 変数                           | 観察ポイント | 統計量                       | トピロキソスタット群                | アロプリノール群           | 群間比較 P 値          |       |
|------------------------------|--------|---------------------------|---------------------------|--------------------|-------------------|-------|
| hs トロポニン I (pg/mL)           | 測定値    | 0 週                       | n                         | 64                 | 67                |       |
|                              |        |                           | Mean ± SD                 | 20.7 ± 36.2        | 13.5 ± 20.3       | 0.16  |
|                              |        |                           | Median [Q1, Q3]           | 7.2 [4.1, 17.0]    | 6.6 [4.3, 14.6]   | 0.68  |
|                              |        |                           | Min, Max                  | 1.2, 158.8         | 1.4, 132.3        |       |
|                              |        | 12 週                      | n                         | 61                 | 65                |       |
|                              |        |                           | Mean ± SD                 | 24.1 ± 48.6        | 14.7 ± 27.5       | 0.18  |
|                              |        |                           | Median [Q1, Q3]           | 7.3 [4.1, 16.2]    | 6.1 [4.1, 18.3]   | 0.84  |
|                              |        |                           | Min, Max                  | 1.5, 294.8         | 1.1, 197.9        |       |
|                              |        | 24 週                      | n                         | 61                 | 63                |       |
|                              |        |                           | Mean ± SD                 | 19.6 ± 31.6        | 17.0 ± 47.6       | 0.71  |
|                              |        |                           | Median [Q1, Q3]           | 8.0 [4.5, 16.2]    | 6.5 [4.0, 13.1]   | 0.37  |
|                              |        |                           | Min, Max                  | 1.2, 145.0         | 1.5, 375.3        |       |
|                              | 変化量    | 12 週                      | n                         | 61                 | 65                |       |
|                              |        |                           | Mean ± SD                 | 3.1 ± 42.6         | 3.2 ± 24.2        | 0.99  |
|                              |        |                           | Median [Q1, Q3]           | 0.2 [-1.4, 2.3]    | 0.1 [-1.0, 1.3]   | 0.76  |
|                              |        |                           | Min, Max                  | -154.4, 287.7      | -18.9, 190.4      |       |
|                              |        |                           | One-sample t-test         | 0.57               | 0.30              |       |
|                              |        |                           | Wilcoxon signed-rank test | 0.45               | 0.62              |       |
|                              |        | 24 週                      | n                         | 61                 | 63                |       |
|                              |        |                           | Mean ± SD                 | 1.2 ± 12.5         | 4.9 ± 43.3        | 0.52  |
|                              |        |                           | Median [Q1, Q3]           | 1.0 [-0.7, 2.6]    | -0.2 [-2.1, 1.1]  | 0.024 |
|                              |        |                           | Min, Max                  | -68.9, 42.3        | -18.4, 340.7      |       |
|                              |        |                           | One-sample t-test         | 0.47               | 0.37              |       |
|                              |        |                           | Wilcoxon signed-rank test | 0.020              | 0.52              |       |
| 変化率                          | 12 週   | n                         | 61                        | 65                 |                   |       |
|                              |        | Mean ± SD                 | 74.1 ± 519.2              | 43.7 ± 315.9       | 0.69              |       |
|                              |        | Median [Q1, Q3]           | 4.0 [-14.6, 27.8]         | 0.8 [-17.6, 23.4]  | 0.44              |       |
|                              |        | Min, Max                  | -97.2, 4052.1             | -44.9, 2538.7      |                   |       |
|                              |        | One-sample t-test         | 0.27                      | 0.27               |                   |       |
|                              |        | Wilcoxon signed-rank test | 0.13                      | 0.42               |                   |       |
|                              | 24 週   | n                         | 61                        | 63                 |                   |       |
|                              |        | Mean ± SD                 | 20.5 ± 45.7               | 20.1 ± 128.5       | 0.98              |       |
|                              |        | Median [Q1, Q3]           | 18.1 [-9.2, 43.2]         | -5.4 [-17.2, 29.4] | 0.048             |       |
|                              |        | Min, Max                  | -89.7, 188.0              | -53.6, 984.7       |                   |       |
|                              |        | One-sample t-test         | <0.001                    | 0.22               |                   |       |
|                              |        | Wilcoxon signed-rank test | <0.001                    | 0.38               |                   |       |
| 対数変換 hs トロポニン I (ln (pg/mL)) | 測定値    | 0 週                       | n                         | 64                 | 67                |       |
|                              |        |                           | Mean ± SD                 | 2.19 ± 1.19        | 2.06 ± 0.96       | 0.51  |
|                              |        |                           | Median [Q1, Q3]           | 1.97 [1.41, 2.83]  | 1.89 [1.46, 2.68] | 0.68  |
|                              |        |                           | Min, Max                  | 0.18, 5.07         | 0.34, 4.89        |       |
|                              | 12 週   | n                         | 61                        | 65                 |                   |       |
|                              |        | Mean ± SD                 | 2.21 ± 1.23               | 2.06 ± 1.01        | 0.44              |       |

2. PPS  
2.1. トロポニンI

|                           |      |                           |                           |                       |                     |       |
|---------------------------|------|---------------------------|---------------------------|-----------------------|---------------------|-------|
|                           |      | Median [Q1, Q3]           | 1.99 [1.41, 2.79]         | 1.81 [1.41, 2.91]     | 0.84                |       |
|                           |      | Min, Max                  | 0.41, 5.69                | 0.10, 5.29            |                     |       |
|                           | 24 週 | n                         | 61                        | 63                    |                     |       |
|                           |      | Mean ±SD                  | 2.23 ±1.15                | 2.06 ±1.00            | 0.38                |       |
|                           |      | Median [Q1, Q3]           | 2.08 [1.50, 2.79]         | 1.87 [1.39, 2.57]     | 0.37                |       |
|                           |      | Min, Max                  | 0.18, 4.98                | 0.41, 5.93            |                     |       |
|                           | 変化量  | 12 週                      | n                         | 61                    | 65                  |       |
|                           |      |                           | Mean ±SD                  | 0.04 ±0.75            | 0.06 ±0.49          | 0.88  |
|                           |      |                           | Median [Q1, Q3]           | 0.04 [-0.16, 0.25]    | 0.01 [-0.19, 0.21]  | 0.44  |
|                           |      |                           | Min, Max                  | -3.59, 3.73           | -0.60, 3.27         |       |
|                           |      |                           | One-sample t-test         | 0.69                  | 0.37                |       |
|                           |      |                           | Wilcoxon signed-rank test | 0.25                  | 0.81                |       |
|                           |      | 24 週                      | n                         | 61                    | 63                  |       |
|                           |      |                           | Mean ±SD                  | 0.10 ±0.46            | 0.02 ±0.46          | 0.34  |
|                           |      |                           | Median [Q1, Q3]           | 0.17 [-0.10, 0.36]    | -0.06 [-0.19, 0.26] | 0.048 |
|                           |      |                           | Min, Max                  | -2.27, 1.06           | -0.77, 2.38         |       |
|                           |      |                           | One-sample t-test         | 0.09                  | 0.69                |       |
|                           |      |                           | Wilcoxon signed-rank test | 0.005                 | 0.89                |       |
|                           | 変化率  | 12 週                      | n                         | 61                    | 65                  |       |
|                           |      |                           | Mean ±SD                  | 10.99 ±44.37          | 2.87 ±32.27         | 0.24  |
| Median [Q1, Q3]           |      |                           | 1.48 [-7.97, 13.63]       | 0.31 [-10.90, 10.92]  | 0.34                |       |
| Min, Max                  |      |                           | -70.76, 191.04            | -82.04, 162.43        |                     |       |
| One-sample t-test         |      |                           | 0.06                      | 0.48                  |                     |       |
| Wilcoxon signed-rank test |      |                           | 0.23                      | 0.91                  |                     |       |
| 24 週                      |      | n                         | 61                        | 63                    |                     |       |
|                           |      | Mean ±SD                  | 15.84 ±61.25              | 6.02 ±32.41           | 0.26                |       |
|                           |      | Median [Q1, Q3]           | 7.85 [-5.17, 18.55]       | -2.78 [-11.86, 16.91] | 0.10                |       |
|                           |      | Min, Max                  | -92.56, 424.08            | -44.54, 147.54        |                     |       |
|                           |      | One-sample t-test         | 0.048                     | 0.15                  |                     |       |
|                           |      | Wilcoxon signed-rank test | 0.004                     | 0.56                  |                     |       |

## 2.2. 心房細動症例を除外した部分集団での FMD

## 2.2. 心房細動症例を除外した部分集団での FMD

除外した心房細動症例の定義は、心不全の原疾患もしくは合併症に心房細動があり、かつ登録時の心電図検査でも心房細動の所見があった症例、とした。

表 2.2. [PPS] 心房細動症例を除外した部分集団での FMD

| 変数      |     | 観察<br>ポイント | 統計量                       | トピロキソスタット群         | アロプリノール群            | 群間比較<br>P 値 |
|---------|-----|------------|---------------------------|--------------------|---------------------|-------------|
| FMD (%) | 測定値 | 0 週        | n                         | 29                 | 31                  |             |
|         |     |            | Mean ± SD                 | 4.84 ± 2.38        | 4.86 ± 2.27         | 0.97        |
|         |     |            | Median [Q1, Q3]           | 4.60 [3.10, 5.80]  | 4.80 [3.40, 5.80]   | 0.78        |
|         |     |            | Min, Max                  | 1.70, 11.50        | 1.10, 10.80         |             |
|         |     | 24 週       | n                         | 29                 | 29                  |             |
|         |     |            | Mean ± SD                 | 4.99 ± 2.51        | 4.54 ± 1.72         | 0.42        |
|         |     |            | Median [Q1, Q3]           | 4.00 [3.50, 6.10]  | 4.20 [3.40, 5.30]   | 0.77        |
|         |     |            | Min, Max                  | 1.50, 12.60        | 1.60, 9.20          |             |
|         | 変化量 | 24 週       | n                         | 28                 | 28                  |             |
|         |     |            | Mean ± SD                 | 0.13 ± 1.18        | -0.35 ± 1.49        | 0.19        |
|         |     |            | Median [Q1, Q3]           | 0.10 [-0.70, 1.00] | -0.35 [-0.95, 0.40] | 0.22        |
|         |     |            | Min, Max                  | -1.90, 3.00        | -5.60, 2.40         |             |
|         |     |            | One-sample t-test         | 0.57               | 0.22                |             |
|         |     |            | Wilcoxon signed-rank test | 0.63               | 0.20                |             |

## 2.3. ベースライン時 EF45%未満の部分集団での FMD、8-OHdG、XOR 活性、尿酸

表 2.3. [PPS] ベースライン時 EF45%未満の部分集団での FMD、8-OHdG、XOR 活性、尿酸

| 変数                |      | 観察ポイント            | 統計量                       | トピロキシスタット群         | アロプリノール群            | 群間比較 P 値 |
|-------------------|------|-------------------|---------------------------|--------------------|---------------------|----------|
| FMD (%)           | 測定値  | 0 週               | n                         | 12                 | 13                  |          |
|                   |      |                   | Mean ± SD                 | 5.28 ± 3.09        | 5.38 ± 2.32         | 0.92     |
|                   |      |                   | Median [Q1, Q3]           | 4.30 [2.90, 7.55]  | 4.70 [4.00, 6.70]   | 0.61     |
|                   |      |                   | Min, Max                  | 1.90, 11.50        | 1.10, 9.80          |          |
|                   |      | 24 週              | n                         | 12                 | 13                  |          |
|                   |      |                   | Mean ± SD                 | 5.79 ± 3.09        | 4.93 ± 1.92         | 0.41     |
|                   |      |                   | Median [Q1, Q3]           | 5.30 [3.75, 7.80]  | 4.10 [3.60, 5.20]   | 0.53     |
|                   |      |                   | Min, Max                  | 1.50, 12.60        | 3.40, 9.20          |          |
|                   | 変化量  | 24 週              | n                         | 11                 | 12                  |          |
|                   |      |                   | Mean ± SD                 | 0.48 ± 1.16        | -0.02 ± 1.31        | 0.35     |
|                   |      |                   | Median [Q1, Q3]           | 0.60 [-0.40, 1.10] | -0.15 [-0.95, 0.50] | 0.24     |
|                   |      |                   | Min, Max                  | -1.30, 3.00        | -1.60, 2.40         |          |
|                   |      |                   | One-sample t-test         | 0.20               | 0.97                |          |
|                   |      |                   | Wilcoxon signed-rank test | 0.23               | 0.72                |          |
| 8-OHdG (ng/mg・Cr) | 測定値  | 0 週               | n                         | 16                 | 18                  |          |
|                   |      |                   | Mean ± SD                 | 8.8 ± 3.8          | 7.3 ± 3.0           | 0.20     |
|                   |      |                   | Median [Q1, Q3]           | 8.3 [5.4, 11.7]    | 6.7 [5.7, 9.2]      | 0.27     |
|                   |      |                   | Min, Max                  | 3.4, 15.7          | 2.8, 13.5           |          |
|                   |      | 12 週              | n                         | 16                 | 17                  |          |
|                   |      |                   | Mean ± SD                 | 9.0 ± 3.5          | 8.7 ± 2.7           | 0.76     |
|                   |      |                   | Median [Q1, Q3]           | 8.2 [7.2, 10.5]    | 8.6 [7.3, 10.9]     | 0.84     |
|                   |      |                   | Min, Max                  | 3.6, 16.8          | 4.3, 13.6           |          |
|                   |      | 24 週              | n                         | 14                 | 17                  |          |
|                   |      |                   | Mean ± SD                 | 8.6 ± 4.0          | 10.2 ± 2.0          | 0.17     |
|                   |      |                   | Median [Q1, Q3]           | 8.5 [6.0, 9.6]     | 10.5 [8.7, 11.8]    | 0.045    |
|                   |      |                   | Min, Max                  | 4.1, 20.1          | 5.9, 12.7           |          |
|                   | 変化量  | 12 週              | n                         | 16                 | 17                  |          |
|                   |      |                   | Mean ± SD                 | 0.2 ± 2.9          | 1.3 ± 3.3           | 0.30     |
|                   |      |                   | Median [Q1, Q3]           | 1.2 [-1.4, 2.3]    | 2.1 [-1.2, 4.2]     | 0.23     |
|                   |      |                   | Min, Max                  | -5.8, 3.6          | -5.5, 5.4           |          |
|                   |      |                   | One-sample t-test         | 0.80               | 0.12                |          |
|                   |      |                   | Wilcoxon signed-rank test | 0.55               | 0.12                |          |
|                   |      | 24 週              | n                         | 14                 | 17                  |          |
|                   |      |                   | Mean ± SD                 | 0.2 ± 3.8          | 2.8 ± 3.2           | 0.05     |
|                   |      |                   | Median [Q1, Q3]           | 1.0 [-1.2, 2.3]    | 2.9 [1.2, 4.6]      | 0.07     |
|                   |      |                   | Min, Max                  | -9.9, 6.2          | -2.3, 8.3           |          |
|                   |      |                   | One-sample t-test         | 0.83               | 0.003               |          |
|                   |      |                   | Wilcoxon signed-rank test | 0.49               | 0.002               |          |
| 変化率               | 12 週 | n                 | 16                        | 17                 |                     |          |
|                   |      | Mean ± SD         | 11.1 ± 36.7               | 32.8 ± 53.3        | 0.19                |          |
|                   |      | Median [Q1, Q3]   | 16.5 [-13.5, 30.4]        | 33.8 [-16.0, 73.1] | 0.26                |          |
|                   |      | Min, Max          | -61.7, 81.8               | -43.0, 127.8       |                     |          |
|                   |      | One-sample t-test | 0.24                      | 0.022              |                     |          |

## 2.3. ベースライン時 EF45%未満の部分集団での FMD、8-OHdG、XOR 活性、尿酸

|                                              |     |      |                           |                     |                      |       |
|----------------------------------------------|-----|------|---------------------------|---------------------|----------------------|-------|
|                                              |     |      | Wilcoxon signed-rank test | 0.21                | 0.034                |       |
|                                              |     | 24 週 | n                         | 14                  | 17                   |       |
|                                              |     |      | Mean ± SD                 | 15.3 ± 56.6         | 62.1 ± 81.5          | 0.08  |
|                                              |     |      | Median [Q1, Q3]           | 13.4 [-16.4, 28.0]  | 51.5 [16.2, 63.9]    | 0.018 |
|                                              |     |      | Min, Max                  | -70.7, 182.4        | -18.0, 296.4         |       |
|                                              |     |      | One-sample t-test         | 0.33                | 0.006                |       |
|                                              |     |      | Wilcoxon signed-rank test | 0.36                | <0.001               |       |
| XOR 活性<br>(pmol/h/mL<br>plasma)              | 測定値 | 0 週  | n                         | 16                  | 18                   |       |
|                                              |     |      | Mean ± SD                 | 51.9 ± 42.3         | 42.4 ± 46.7          | 0.54  |
|                                              |     |      | Median [Q1, Q3]           | 38.3 [22.6, 70.9]   | 30.9 [15.3, 41.8]    | 0.22  |
|                                              |     |      | Min, Max                  | 13.6, 170.0         | 6.7, 201.0           |       |
|                                              |     | 24 週 | n                         | 14                  | 17                   |       |
|                                              |     |      | Mean ± SD                 | 35.5 ± 63.4         | 16.4 ± 13.7          | 0.23  |
|                                              | 変化量 | 24 週 | n                         | 14                  | 17                   |       |
|                                              |     |      | Mean ± SD                 | -16.8 ± 67.1        | -28.1 ± 40.4         | 0.57  |
|                                              |     |      | Median [Q1, Q3]           | -18.5 [-42.1, -3.3] | -21.1 [-28.8, -8.6]  | 0.87  |
|                                              |     |      | Min, Max                  | -110.2, 182.2       | -174.1, 0.0          |       |
|                                              |     | 24 週 | One-sample t-test         | 0.37                | 0.011                |       |
|                                              |     |      | Wilcoxon signed-rank test | 0.017               | <0.001               |       |
|                                              | 変化率 | 24 週 | n                         | 14                  | 17                   |       |
|                                              |     |      | Mean ± SD                 | -29.7 ± 90.6        | -54.5 ± 23.8         | 0.29  |
|                                              |     |      | Median [Q1, Q3]           | -61.4 [-75.5, -9.3] | -56.1 [-67.7, -46.2] | 0.86  |
|                                              |     |      | Min, Max                  | -84.0, 268.7        | -86.6, 0.0           |       |
|                                              |     | 24 週 | One-sample t-test         | 0.24                | <0.001               |       |
|                                              |     |      | Wilcoxon signed-rank test | 0.017               | <0.001               |       |
| 対数変換 XOR<br>活性 (ln<br>(pmol/h/mL<br>plasma)) | 測定値 | 0 週  | n                         | 16                  | 18                   |       |
|                                              |     |      | Mean ± SD                 | 3.7 ± 0.7           | 3.3 ± 0.9            | 0.22  |
|                                              |     |      | Median [Q1, Q3]           | 3.6 [3.1, 4.3]      | 3.4 [2.7, 3.7]       | 0.22  |
|                                              |     |      | Min, Max                  | 2.6, 5.1            | 1.9, 5.3             |       |
|                                              |     | 24 週 | n                         | 14                  | 17                   |       |
|                                              |     |      | Mean ± SD                 | 2.9 ± 1.0           | 2.5 ± 0.7            | 0.19  |
|                                              | 変化量 | 24 週 | n                         | 14                  | 17                   |       |
|                                              |     |      | Mean ± SD                 | -0.8 ± 0.8          | -0.9 ± 0.5           | 0.54  |
|                                              |     |      | Median [Q1, Q3]           | -1.0 [-1.4, -0.1]   | -0.8 [-1.1, -0.6]    | 0.86  |
|                                              |     |      | Min, Max                  | -1.8, 1.3           | -2.0, 0.0            |       |
|                                              |     | 24 週 | One-sample t-test         | 0.005               | <0.001               |       |
|                                              |     |      | Wilcoxon signed-rank test | 0.007               | <0.001               |       |
|                                              | 変化率 | 24 週 | n                         | 14                  | 17                   |       |
|                                              |     |      | Mean ± SD                 | -20.4 ± 20.8        | -26.3 ± 13.5         | 0.35  |
|                                              |     |      | Median [Q1, Q3]           | -25.6 [-32.7, -3.1] | -30.2 [-34.5, -17.6] | 0.49  |
|                                              |     |      | Min, Max                  | -44.1, 30.9         | -46.5, 0.0           |       |
|                                              |     | 24 週 | One-sample t-test         | 0.003               | <0.001               |       |
|                                              |     |      | Wilcoxon signed-rank test | 0.005               | <0.001               |       |
| 血中尿酸値<br>(mg/dL)                             | 測定値 | 0 週  | n                         | 16                  | 18                   |       |
|                                              |     |      | Mean ± SD                 | 8.5 ± 1.3           | 8.5 ± 1.3            | 0.97  |



## 2. PPS

## 2.3. ベースライン時 EF45%未満の部分集団での FMD、8-OHdG、XOR 活性、尿酸

|                           |                 |                 |                           |                   |                   |      |
|---------------------------|-----------------|-----------------|---------------------------|-------------------|-------------------|------|
|                           |                 | Median [Q1, Q3] | 8.4 [7.2, 9.6]            | 8.5 [7.6, 8.8]    | 0.97              |      |
|                           |                 | Min, Max        | 6.9, 10.6                 | 6.7, 11.6         |                   |      |
|                           |                 | 12 週            | n                         | 16                | 17                |      |
|                           |                 | Mean $\pm$ SD   | 5.9 $\pm$ 1.2             | 6.0 $\pm$ 0.9     | 0.78              |      |
|                           |                 | Median [Q1, Q3] | 6.0 [5.3, 6.7]            | 6.0 [5.7, 6.4]    | 0.76              |      |
|                           |                 | Min, Max        | 3.9, 8.7                  | 4.5, 7.4          |                   |      |
|                           |                 | 24 週            | n                         | 14                | 17                |      |
|                           |                 | Mean $\pm$ SD   | 6.1 $\pm$ 1.3             | 6.0 $\pm$ 0.9     | 0.74              |      |
|                           | Median [Q1, Q3] | 6.3 [4.7, 7.2]  | 6.0 [5.3, 6.4]            | 0.80              |                   |      |
|                           | Min, Max        | 4.5, 7.8        | 4.5, 7.9                  |                   |                   |      |
|                           | 変化量             | 12 週            | n                         | 16                | 17                |      |
|                           |                 |                 | Mean $\pm$ SD             | -2.6 $\pm$ 1.2    | -2.3 $\pm$ 0.9    | 0.46 |
|                           |                 |                 | Median [Q1, Q3]           | -2.3 [-3.4, -1.7] | -2.3 [-2.7, -1.8] | 0.68 |
|                           |                 |                 | Min, Max                  | -5.3, -1.2        | -4.4, -1.0        |      |
|                           |                 |                 | One-sample t-test         | <0.001            | <0.001            |      |
|                           |                 |                 | Wilcoxon signed-rank test | <0.001            | <0.001            |      |
| 24 週                      |                 | n               | 14                        | 17                |                   |      |
|                           |                 | Mean $\pm$ SD   | -2.3 $\pm$ 1.3            | -2.3 $\pm$ 1.0    | 0.97              |      |
|                           |                 | Median [Q1, Q3] | -2.6 [-2.8, -1.7]         | -2.2 [-3.0, -1.7] | 0.86              |      |
|                           |                 | Min, Max        | -4.6, 0.0                 | -4.4, -0.4        |                   |      |
| One-sample t-test         | <0.001          | <0.001          |                           |                   |                   |      |
| Wilcoxon signed-rank test | <0.001          | <0.001          |                           |                   |                   |      |

## 2.4. ベースライン時 EF50%以上の部分集団での FMD、8-OHdG、XOR 活性、尿酸

表 2.4. [PPS] ベースライン時 EF50%以上の部分集団での FMD、8-OHdG、XOR 活性、尿酸

| 変数                   |                           | 観察<br>ポイント | 統計量                       | トピロキシスタット群         | アロプリノール群            | 群間比較<br>P 値 |
|----------------------|---------------------------|------------|---------------------------|--------------------|---------------------|-------------|
| FMD (%)              | 測定値                       | 0 週        | n                         | 30                 | 27                  |             |
|                      |                           |            | Mean ± SD                 | 4.53 ± 2.18        | 4.36 ± 1.95         | 0.75        |
|                      |                           |            | Median [Q1, Q3]           | 4.60 [3.00, 5.50]  | 4.50 [2.90, 5.20]   | 0.94        |
|                      |                           |            | Min, Max                  | 1.10, 10.50        | 1.30, 10.80         |             |
|                      |                           | 24 週       | n                         | 30                 | 26                  |             |
|                      |                           |            | Mean ± SD                 | 4.60 ± 2.26        | 3.79 ± 1.34         | 0.12        |
|                      |                           |            | Median [Q1, Q3]           | 3.95 [3.00, 5.60]  | 3.80 [2.90, 4.70]   | 0.30        |
|                      |                           |            | Min, Max                  | 1.30, 10.70        | 1.20, 6.20          |             |
|                      | 変化量                       | 24 週       | n                         | 30                 | 26                  |             |
|                      |                           |            | Mean ± SD                 | 0.07 ± 1.96        | -0.65 ± 1.43        | 0.13        |
|                      |                           |            | Median [Q1, Q3]           | 0.25 [-0.90, 1.20] | -0.50 [-0.90, 0.10] | 0.06        |
|                      |                           |            | Min, Max                  | -6.60, 4.40        | -5.60, 1.30         |             |
|                      |                           |            | One-sample t-test         | 0.85               | 0.030               |             |
|                      |                           |            | Wilcoxon signed-rank test | 0.53               | 0.020               |             |
| 8-OHdG<br>(ng/mg・Cr) | 測定値                       | 0 週        | n                         | 42                 | 42                  |             |
|                      |                           |            | Mean ± SD                 | 7.4 ± 3.4          | 6.9 ± 3.4           | 0.44        |
|                      |                           |            | Median [Q1, Q3]           | 6.9 [5.4, 8.3]     | 6.1 [4.5, 8.3]      | 0.32        |
|                      |                           |            | Min, Max                  | 2.9, 22.3          | 2.1, 19.9           |             |
|                      |                           | 12 週       | n                         | 39                 | 41                  |             |
|                      |                           |            | Mean ± SD                 | 9.1 ± 4.1          | 10.6 ± 6.2          | 0.22        |
|                      |                           |            | Median [Q1, Q3]           | 8.2 [6.5, 11.0]    | 9.1 [7.0, 12.3]     | 0.21        |
|                      |                           |            | Min, Max                  | 4.1, 20.7          | 4.6, 37.9           |             |
|                      |                           | 24 週       | n                         | 41                 | 40                  |             |
|                      |                           |            | Mean ± SD                 | 8.7 ± 4.5          | 10.1 ± 4.7          | 0.17        |
|                      |                           |            | Median [Q1, Q3]           | 8.3 [5.7, 9.5]     | 8.7 [7.4, 12.1]     | 0.12        |
|                      |                           |            | Min, Max                  | 1.5, 24.9          | 3.6, 25.6           |             |
|                      | 変化量                       | 12 週       | n                         | 39                 | 41                  |             |
|                      |                           |            | Mean ± SD                 | 1.5 ± 3.5          | 3.7 ± 4.7           | 0.022       |
|                      |                           |            | Median [Q1, Q3]           | 1.1 [-0.2, 2.9]    | 2.6 [0.9, 4.7]      | 0.006       |
|                      |                           |            | Min, Max                  | -6.5, 12.7         | -2.6, 27.3          |             |
|                      |                           |            | One-sample t-test         | 0.013              | <0.001              |             |
|                      |                           |            | Wilcoxon signed-rank test | 0.004              | <0.001              |             |
|                      |                           | 24 週       | n                         | 41                 | 40                  |             |
|                      |                           |            | Mean ± SD                 | 1.2 ± 3.4          | 3.4 ± 3.2           | 0.003       |
|                      |                           |            | Median [Q1, Q3]           | 1.1 [-0.4, 2.5]    | 3.2 [1.4, 5.4]      | 0.002       |
|                      |                           |            | Min, Max                  | -7.3, 11.9         | -1.8, 10.6          |             |
| One-sample t-test    |                           | 0.031      | <0.001                    |                    |                     |             |
|                      | Wilcoxon signed-rank test | 0.017      | <0.001                    |                    |                     |             |
|                      | 変化率                       | 12 週       | n                         | 39                 | 41                  |             |
|                      |                           |            | Mean ± SD                 | 26.9 ± 47.1        | 64.6 ± 70.5         | 0.007       |
| Median [Q1, Q3]      |                           |            | 16.1 [-3.0, 50.9]         | 49.0 [13.2, 85.7]  | 0.006               |             |
| Min, Max             |                           |            | -46.7, 158.8              | -27.1, 275.0       |                     |             |
| One-sample t-test    | <0.001                    | <0.001     |                           |                    |                     |             |

## 2. PPS

## 2.4. ベースライン時 EF50%以上の部分集団での FMD、8-OHdG、XOR 活性、尿酸

|                                              |     |      |                           |                         |                      |        |  |
|----------------------------------------------|-----|------|---------------------------|-------------------------|----------------------|--------|--|
|                                              |     |      | Wilcoxon signed-rank test | <0.001                  | <0.001               |        |  |
|                                              |     | 24 週 | n                         | 41                      | 40                   |        |  |
|                                              |     |      | Mean ± SD                 | 20.4 ± 45.1             | 64.0 ± 64.1          | <0.001 |  |
|                                              |     |      | Median [Q1, Q3]           | 13.2 [-5.5, 39.8]       | 42.9 [20.5, 109.0]   | 0.002  |  |
|                                              |     |      | Min, Max                  | -83.0, 151.2            | -25.0, 195.6         |        |  |
|                                              |     |      | One-sample t-test         | 0.006                   | <0.001               |        |  |
|                                              |     |      | Wilcoxon signed-rank test | 0.006                   | <0.001               |        |  |
| XOR 活性<br>(pmol/h/mL<br>plasma)              | 測定値 | 0 週  | n                         | 42                      | 42                   |        |  |
|                                              |     |      | Mean ± SD                 | 60.5 ± 60.0             | 79.0 ± 156.1         | 0.48   |  |
|                                              |     |      | Median [Q1, Q3]           | 40.9 [27.1, 61.5]       | 29.2 [17.8, 57.5]    | 0.11   |  |
|                                              |     |      | Min, Max                  | 16.3, 342.0             | 7.5, 946.0           |        |  |
|                                              |     | 24 週 | n                         | 41                      | 40                   |        |  |
|                                              |     |      | Mean ± SD                 | 19.7 ± 19.2             | 29.1 ± 41.5          | 0.20   |  |
|                                              | 変化量 | 24 週 | n                         | 41                      | 40                   |        |  |
|                                              |     |      | Mean ± SD                 | -40.9 ± 58.1            | -53.0 ± 141.1        | 0.61   |  |
|                                              |     |      | Median [Q1, Q3]           | -21.9 [-45.7,<br>-14.1] | -18.0 [-46.0, -8.2]  | 0.31   |  |
|                                              |     |      | Min, Max                  | -334.9, 15.9            | -868.1, 65.0         |        |  |
|                                              |     |      | One-sample t-test         | <0.001                  | 0.022                |        |  |
|                                              |     |      | Wilcoxon signed-rank test | <0.001                  | <0.001               |        |  |
|                                              | 変化率 | 24 週 | n                         | 41                      | 40                   |        |  |
|                                              |     |      | Mean ± SD                 | -58.2 ± 34.6            | -43.0 ± 47.6         | 0.10   |  |
|                                              |     |      | Median [Q1, Q3]           | -69.2 [-82.0,<br>-52.3] | -52.6 [-72.0, -36.5] | 0.036  |  |
|                                              |     |      | Min, Max                  | -97.9, 59.6             | -91.8, 130.0         |        |  |
|                                              |     |      | One-sample t-test         | <0.001                  | <0.001               |        |  |
|                                              |     |      | Wilcoxon signed-rank test | <0.001                  | <0.001               |        |  |
| 対数変換 XOR<br>活性 (ln<br>(pmol/h/mL<br>plasma)) | 測定値 | 0 週  | n                         | 42                      | 42                   |        |  |
|                                              |     |      | Mean ± SD                 | 3.8 ± 0.7               | 3.6 ± 1.1            | 0.33   |  |
|                                              |     |      | Median [Q1, Q3]           | 3.7 [3.3, 4.1]          | 3.4 [2.9, 4.1]       | 0.11   |  |
|                                              |     |      | Min, Max                  | 2.8, 5.8                | 2.0, 6.9             |        |  |
|                                              |     | 24 週 | n                         | 41                      | 40                   |        |  |
|                                              |     |      | Mean ± SD                 | 2.6 ± 0.8               | 2.8 ± 0.9            | 0.26   |  |
|                                              | 変化量 | 24 週 | n                         | 41                      | 40                   |        |  |
|                                              |     |      | Mean ± SD                 | -1.2 ± 0.9              | -0.8 ± 0.7           | 0.045  |  |
|                                              |     |      | Median [Q1, Q3]           | -1.2 [-1.7, -0.7]       | -0.7 [-1.3, -0.5]    | 0.036  |  |
|                                              |     |      | Min, Max                  | -3.9, 0.5               | -2.5, 0.8            |        |  |
|                                              |     |      | One-sample t-test         | <0.001                  | <0.001               |        |  |
|                                              |     |      | Wilcoxon signed-rank test | <0.001                  | <0.001               |        |  |
|                                              | 変化率 | 24 週 | n                         | 41                      | 40                   |        |  |
|                                              |     |      | Mean ± SD                 | -30.4 ± 19.2            | -20.9 ± 18.4         | 0.027  |  |
|                                              |     |      | Median [Q1, Q3]           | -34.1 [-44.0,<br>-17.6] | -23.2 [-33.3, -13.7] | 0.025  |  |
|                                              |     |      | Min, Max                  | -66.3, 14.2             | -55.8, 26.6          |        |  |
|                                              |     |      |                           | One-sample t-test       | <0.001               | <0.001 |  |

## 2. PPS

## 2.4. ベースライン時 EF50%以上の部分集団での FMD、8-OHdG、XOR 活性、尿酸

|                  |     |                 |                           |                   |                   |       |
|------------------|-----|-----------------|---------------------------|-------------------|-------------------|-------|
|                  |     |                 | Wilcoxon signed-rank test | <0.001            | <0.001            |       |
| 血中尿酸値<br>(mg/dL) | 測定値 | 0 週             | n                         | 41                | 41                |       |
|                  |     |                 | Mean ± SD                 | 8.2 ± 1.4         | 8.2 ± 1.5         | 0.93  |
|                  |     |                 | Median [Q1, Q3]           | 8.0 [7.2, 9.1]    | 8.0 [7.3, 8.7]    | 0.93  |
|                  |     |                 | Min, Max                  | 5.7, 11.6         | 5.4, 12.4         |       |
|                  |     | 12 週            | n                         | 41                | 42                |       |
|                  |     |                 | Mean ± SD                 | 5.2 ± 1.0         | 5.9 ± 1.2         | 0.003 |
|                  |     |                 | Median [Q1, Q3]           | 5.4 [4.7, 5.8]    | 5.9 [5.2, 6.5]    | 0.006 |
|                  |     |                 | Min, Max                  | 3.2, 6.9          | 3.6, 9.0          |       |
|                  |     | 24 週            | n                         | 41                | 40                |       |
|                  |     |                 | Mean ± SD                 | 5.2 ± 1.1         | 6.0 ± 1.2         | 0.005 |
|                  |     |                 | Median [Q1, Q3]           | 5.2 [4.6, 6.0]    | 6.0 [5.1, 6.4]    | 0.009 |
|                  |     |                 | Min, Max                  | 3.1, 7.5          | 3.6, 9.7          |       |
|                  | 変化量 | 12 週            | n                         | 40                | 41                |       |
|                  |     |                 | Mean ± SD                 | -3.0 ± 1.2        | -2.2 ± 1.4        | 0.011 |
|                  |     |                 | Median [Q1, Q3]           | -2.9 [-3.8, -2.2] | -2.0 [-2.9, -1.4] | 0.008 |
|                  |     |                 | Min, Max                  | -5.5, -0.9        | -6.2, 0.7         |       |
|                  |     |                 | One-sample t-test         | <0.001            | <0.001            |       |
|                  |     |                 | Wilcoxon signed-rank test | <0.001            | <0.001            |       |
| 24 週             |     | n               | 40                        | 39                |                   |       |
|                  |     | Mean ± SD       | -2.9 ± 1.5                | -2.2 ± 1.3        | 0.028             |       |
|                  |     | Median [Q1, Q3] | -3.2 [-3.9, -1.9]         | -1.9 [-3.2, -1.3] | 0.012             |       |
|                  |     | Min, Max        | -6.6, 0.6                 | -5.7, 0.5         |                   |       |
|                  |     |                 | One-sample t-test         | <0.001            | <0.001            |       |
|                  |     |                 | Wilcoxon signed-rank test | <0.001            | <0.001            |       |
