# Supplementary material for: Topiroxostat versus allopurinol in patients with chronic heart failure complicated by hyperuricemia: A prospective, randomized, open-label, blinded-end-point clinical trial
Source: PubMed Central journal article supplement (PMC8789120; doi:10.1371/journal.pone.0261445), 2022-01-25
Supplement: pone.0261445.s010.pdf [file pone.0261445.s010.pdf]

高尿酸血症を合併した心不全患者における  
トピロキソスタットとアロプリノールのランダム化比較試験

The **E**ffect of **X**anthine Oxidase Inhibitor  
in **C**hron**I**c heart failure patients  
complica**TED** with hyper-**U**ricemi**A**  
**Excited-UA study**

追加解析報告書  
Ver 1.2

研究代表者：

獨協医科大学病院 心臓・血管内科 教授 井上 晃男

統計解析責任者：

株式会社 総合医科学研究所 医薬臨床研究支援事業部 山田 博万

追加解析報告書の作成・変更履歴

| 日付         | 版番号 | 変更点                 |
|------------|-----|---------------------|
| 2019/09/06 | 1.0 | 初版作成                |
| 2019/10/01 | 1.1 | 全解析から心房細動症例を除外して再解析 |
| 2019/11/05 | 1.2 | 相関解析の追加             |

## 目次

|                                                                       |    |
|-----------------------------------------------------------------------|----|
| 1. FAS から心房細動症例を除外した集団 .....                                          | 1  |
| 1.1. トロポニン I .....                                                    | 1  |
| 表 1.1.1. [FAS] トロポニン I .....                                          | 1  |
| 1.2. FMD .....                                                        | 3  |
| 表 1.2.1. [FAS] FMD .....                                              | 3  |
| 表 1.2.2. [FAS] FMD の変化量と EndoPAT の変化量の相関 .....                        | 3  |
| 1.3. ベースライン時 EF45%未満の部分集団での FMD、8-OHdG、XOR 活性、尿酸 .....                | 4  |
| 表 1.3.1. [FAS] ベースライン時 EF45%未満の部分集団での FMD、8-OHdG、XOR 活性、尿酸 .....      | 4  |
| 表 1.3.2. [FAS] ベースライン時 EF45%未満の部分集団での FMD の変化量と EndoPAT の変化量の相関 ..... | 6  |
| 1.4. ベースライン時 EF50%以上の部分集団での FMD、8-OHdG、XOR 活性、尿酸 .....                | 7  |
| 表 1.4.1. [FAS] ベースライン時 EF50%以上の部分集団での FMD、8-OHdG、XOR 活性、尿酸 .....      | 7  |
| 表 1.4.2. [FAS] ベースライン時 EF50%以上の部分集団での FMD の変化量と EndoPAT の変化量の相関 ..... | 9  |
| 2. PPS から心房細動除症例を除外した集団 .....                                         | 10 |
| 2.1. トロポニン I .....                                                    | 10 |
| 表 2.1.1. [PPS] トロポニン I .....                                          | 10 |
| 2.2. FMD .....                                                        | 12 |
| 表 2.2.1. [PPS] FMD .....                                              | 12 |
| 表 2.2.2. [PPS] FMD の変化量と EndoPAT の変化量の相関 .....                        | 12 |
| 2.3. ベースライン時 EF45%未満の部分集団での FMD、8-OHdG、XOR 活性、尿酸 .....                | 13 |
| 表 2.3.1. [PPS] ベースライン時 EF45%未満の部分集団での FMD、8-OHdG、XOR 活性、尿酸 .....      | 13 |
| 表 2.3.2. [PPS] ベースライン時 EF45%未満の部分集団での FMD の変化量と EndoPAT の変化量の相関 ..... | 15 |
| 2.4. ベースライン時 EF50%以上の部分集団での FMD、8-OHdG、XOR 活性、尿酸 .....                | 16 |
| 表 2.4.1. [PPS] ベースライン時 EF50%以上の部分集団での FMD、8-OHdG、XOR 活性、尿酸 .....      | 16 |
| 表 2.4.2. [PPS] ベースライン時 EF50%以上の部分集団での FMD の変化量と EndoPAT の変化量の相関 ..... | 18 |

1. FAS から心房細動症例を除外した集団

1.1. トロポニン I

1. FAS から心房細動症例を除外した集団

除外した心房細動症例の定義は、心不全の原疾患もしくは合併症に心房細動があり、かつ登録時の心電図検査でも心房細動の所見があった症例、とした。

1.1. トロポニン I

表 1.1.1. [FAS] トロポニン I

| 変数                           | 観察<br>ポイント | 統計量                       | トピロキソスタット群                | アロプリノール群           | 群間比較<br>P 値       |       |
|------------------------------|------------|---------------------------|---------------------------|--------------------|-------------------|-------|
| hs トロポニン I<br>(pg/mL)        | 測定値        | 0 週                       | n                         | 40                 | 45                |       |
|                              |            |                           | Mean ± SD                 | 27.5 ± 41.9        | 17.9 ± 23.7       | 0.19  |
|                              |            |                           | Median [Q1, Q3]           | 8.5 [4.9, 29.4]    | 7.9 [6.4, 17.9]   | 1.00  |
|                              |            |                           | Min, Max                  | 1.5, 152.7         | 1.6, 132.3        |       |
|                              |            | 12 週                      | n                         | 39                 | 43                |       |
|                              |            |                           | Mean ± SD                 | 34.0 ± 58.6        | 21.6 ± 34.5       | 0.24  |
|                              |            |                           | Median [Q1, Q3]           | 9.6 [4.6, 29.2]    | 9.4 [5.1, 21.9]   | 1.00  |
|                              |            |                           | Min, Max                  | 2.0, 294.8         | 1.1, 197.9        |       |
|                              |            | 24 週                      | n                         | 38                 | 42                |       |
|                              |            |                           | Mean ± SD                 | 26.3 ± 38.2        | 22.7 ± 57.6       | 0.75  |
|                              |            |                           | Median [Q1, Q3]           | 9.2 [5.7, 24.8]    | 7.7 [4.5, 21.1]   | 0.48  |
|                              |            |                           | Min, Max                  | 1.8, 145.0         | 1.5, 375.3        |       |
|                              | 変化量        | 12 週                      | n                         | 39                 | 43                |       |
|                              |            |                           | Mean ± SD                 | 9.2 ± 46.5         | 3.7 ± 30.5        | 0.52  |
|                              |            |                           | Median [Q1, Q3]           | 0.3 [-1.0, 3.8]    | 0.1 [-1.7, 2.0]   | 0.30  |
|                              |            |                           | Min, Max                  | -17.9, 287.7       | -40.7, 190.4      |       |
|                              |            |                           | One-sample t-test         | 0.23               | 0.43              |       |
|                              |            |                           | Wilcoxon signed-rank test | 0.14               | 0.90              |       |
|                              |            | 24 週                      | n                         | 38                 | 42                |       |
|                              |            |                           | Mean ± SD                 | 1.7 ± 15.6         | 7.1 ± 53.1        | 0.55  |
|                              |            |                           | Median [Q1, Q3]           | 1.2 [-0.6, 3.3]    | -0.5 [-2.9, 0.8]  | 0.012 |
|                              |            |                           | Min, Max                  | -68.9, 42.3        | -18.4, 340.7      |       |
|                              |            |                           | One-sample t-test         | 0.50               | 0.39              |       |
|                              |            |                           | Wilcoxon signed-rank test | 0.038              | 0.13              |       |
| 変化率                          | 12 週       | n                         | 39                        | 43                 |                   |       |
|                              |            | Mean ± SD                 | 115.0 ± 647.9             | 62.6 ± 388.0       | 0.65              |       |
|                              |            | Median [Q1, Q3]           | 6.4 [-11.5, 27.1]         | 1.9 [-18.9, 20.5]  | 0.22              |       |
|                              |            | Min, Max                  | -55.9, 4052.1             | -44.9, 2538.7      |                   |       |
|                              |            | One-sample t-test         | 0.27                      | 0.30               |                   |       |
|                              |            | Wilcoxon signed-rank test | 0.06                      | 0.70               |                   |       |
|                              | 24 週       | n                         | 38                        | 42                 |                   |       |
|                              |            | Mean ± SD                 | 22.0 ± 39.8               | 20.6 ± 156.3       | 0.96              |       |
|                              |            | Median [Q1, Q3]           | 20.1 [-5.0, 43.2]         | -9.2 [-23.0, 18.2] | 0.003             |       |
|                              |            | Min, Max                  | -49.4, 126.9              | -53.6, 984.7       |                   |       |
|                              |            | One-sample t-test         | 0.002                     | 0.40               |                   |       |
|                              |            | Wilcoxon signed-rank test | 0.001                     | 0.37               |                   |       |
| 対数変換 hs トロポニン I (ln (pg/mL)) | 測定値        | 0 週                       | n                         | 40                 | 45                |       |
|                              |            |                           | Mean ± SD                 | 2.46 ± 1.27        | 2.37 ± 0.97       | 0.72  |
|                              |            |                           | Median [Q1, Q3]           | 2.14 [1.59, 3.37]  | 2.07 [1.86, 2.88] | 1.00  |

1. FAS から心房細動症例を除外した集団

1.1. トロポニン I

|                           |      |                           |                     |                      |             |      |
|---------------------------|------|---------------------------|---------------------|----------------------|-------------|------|
|                           |      | Min, Max                  | 0.41, 5.03          | 0.47, 4.89           |             |      |
|                           | 12 週 | n                         | 39                  | 43                   |             |      |
|                           |      | Mean ±SD                  | 2.55 ±1.33          | 2.43 ±1.09           | 0.64        |      |
|                           |      | Median [Q1, Q3]           | 2.26 [1.53, 3.37]   | 2.24 [1.63, 3.09]    | 1.00        |      |
|                           |      | Min, Max                  | 0.69, 5.69          | 0.10, 5.29           |             |      |
|                           | 24 週 | n                         | 38                  | 42                   |             |      |
|                           |      | Mean ±SD                  | 2.51 ±1.17          | 2.30 ±1.10           | 0.41        |      |
|                           |      | Median [Q1, Q3]           | 2.22 [1.74, 3.21]   | 2.03 [1.50, 3.05]    | 0.48        |      |
|                           |      | Min, Max                  | 0.59, 4.98          | 0.41, 5.93           |             |      |
| 変化量                       | 12 週 | n                         | 39                  | 43                   |             |      |
|                           |      | Mean ±SD                  | 0.16 ±0.66          | 0.07 ±0.58           | 0.51        |      |
|                           |      | Median [Q1, Q3]           | 0.06 [-0.12, 0.24]  | 0.02 [-0.21, 0.19]   | 0.22        |      |
|                           |      | Min, Max                  | -0.82, 3.73         | -0.60, 3.27          |             |      |
|                           |      | One-sample t-test         | 0.14                | 0.45                 |             |      |
|                           |      | Wilcoxon signed-rank test | 0.11                | 0.99                 |             |      |
|                           | 24 週 | n                         | 38                  | 42                   |             |      |
|                           |      | Mean ±SD                  | 0.15 ±0.34          | -0.03 ±0.51          | 0.08        |      |
|                           |      | Median [Q1, Q3]           | 0.18 [-0.05, 0.36]  | -0.10 [-0.26, 0.17]  | 0.003       |      |
|                           |      | Min, Max                  | -0.68, 0.82         | -0.77, 2.38          |             |      |
|                           |      | One-sample t-test         | 0.011               | 0.71                 |             |      |
|                           |      | Wilcoxon signed-rank test | 0.005               | 0.17                 |             |      |
|                           | 変化率  | 12 週                      | n                   | 39                   | 43          |      |
|                           |      |                           | Mean ±SD            | 11.85 ±39.33         | 2.89 ±31.08 | 0.25 |
| Median [Q1, Q3]           |      |                           | 2.00 [-4.79, 9.10]  | 1.09 [-7.81, 7.22]   | 0.32        |      |
| Min, Max                  |      |                           | -42.69, 190.10      | -82.04, 162.43       |             |      |
| One-sample t-test         |      |                           | 0.07                | 0.55                 |             |      |
| Wilcoxon signed-rank test |      |                           | 0.16                | 0.81                 |             |      |
| 24 週                      |      | n                         | 38                  | 42                   |             |      |
|                           |      | Mean ±SD                  | 12.16 ±24.17        | -1.52 ±21.16         | 0.009       |      |
|                           |      | Median [Q1, Q3]           | 7.63 [-1.11, 15.54] | -4.70 [-12.96, 8.85] | 0.004       |      |
|                           |      | Min, Max                  | -29.32, 85.76       | -44.54, 67.27        |             |      |
|                           |      | One-sample t-test         | 0.004               | 0.64                 |             |      |
|                           |      | Wilcoxon signed-rank test | 0.004               | 0.26                 |             |      |

1. FAS から心房細動症例を除外した集団  
 1.2. 心房細動症例を除外した部分集団での FMD

1.2. FMD

表 1.2.1. [FAS] FMD

| 変数      |     | 観察<br>ポイント | 統計量                       | トピロキソスタット群         | アロプリノール群            | 群間比較<br>P 値 |
|---------|-----|------------|---------------------------|--------------------|---------------------|-------------|
| FMD (%) | 測定値 | 0 週        | n                         | 32                 | 33                  |             |
|         |     |            | Mean ± SD                 | 4.88 ± 2.38        | 4.73 ± 2.29         | 0.80        |
|         |     |            | Median [Q1, Q3]           | 4.65 [3.00, 6.00]  | 4.70 [3.40, 5.70]   | 0.94        |
|         |     |            | Min, Max                  | 1.70, 11.50        | 1.10, 10.80         |             |
|         |     | 24 週       | n                         | 31                 | 31                  |             |
|         |     |            | Mean ± SD                 | 4.98 ± 2.45        | 4.53 ± 1.71         | 0.40        |
|         |     |            | Median [Q1, Q3]           | 4.00 [3.50, 6.10]  | 4.20 [3.40, 5.60]   | 0.69        |
|         |     |            | Min, Max                  | 1.50, 12.60        | 1.60, 9.20          |             |
|         | 変化量 | 24 週       | n                         | 30                 | 30                  |             |
|         |     |            | Mean ± SD                 | -0.01 ± 1.40       | -0.22 ± 1.53        | 0.59        |
|         |     |            | Median [Q1, Q3]           | 0.10 [-0.80, 1.00] | -0.10 [-0.90, 0.60] | 0.52        |
|         |     |            | Min, Max                  | -4.30, 3.00        | -5.60, 2.40         |             |
|         |     |            | One-sample t-test         | 0.97               | 0.45                |             |
|         |     |            | Wilcoxon signed-rank test | 0.83               | 0.53                |             |

表 1.2.2. [FAS] FMD の変化量と EndoPAT の変化量の相関

| 変数 1            | 変数 2                        | n  | Pearson            |      | Spearman          |       |
|-----------------|-----------------------------|----|--------------------|------|-------------------|-------|
|                 |                             |    | 相関係数<br>(95%CI)    | P 値  | 相関係数<br>(95%CI)   | P 値   |
| FMD (%) 24 週変化量 | EndoPAT (RHI 指数)<br>24 週変化量 | 60 | 0.25 (-0.01, 0.47) | 0.06 | 0.26 (0.00, 0.48) | 0.048 |

1. FAS から心房細動症例を除外した集団

1.3. ベースライン時 EF45%未満の部分集団での FMD、8-OHdG、XOR 活性、尿酸

1.3. ベースライン時 EF45%未満の部分集団での FMD、8-OHdG、XOR 活性、尿酸

表 1.3.1. [FAS] ベースライン時 EF45%未満の部分集団での FMD、8-OHdG、XOR 活性、尿酸

| 変数                   |      | 観察<br>ポイント      | 統計量                       | トピロキシスタット群         | アロプリノール群            | 群間比較<br>P 値 |
|----------------------|------|-----------------|---------------------------|--------------------|---------------------|-------------|
| FMD (%)              | 測定値  | 0 週             | n                         | 12                 | 13                  |             |
|                      |      |                 | Mean ± SD                 | 5.28 ± 3.09        | 5.40 ± 2.31         | 0.91        |
|                      |      |                 | Median [Q1, Q3]           | 4.30 [2.90, 7.55]  | 4.70 [4.20, 6.70]   | 0.61        |
|                      |      |                 | Min, Max                  | 1.90, 11.50        | 1.10, 9.80          |             |
|                      |      | 24 週            | n                         | 11                 | 13                  |             |
|                      |      |                 | Mean ± SD                 | 6.06 ± 3.08        | 5.09 ± 1.91         | 0.36        |
|                      |      |                 | Median [Q1, Q3]           | 5.90 [4.00, 8.70]  | 4.20 [3.60, 6.00]   | 0.42        |
|                      |      |                 | Min, Max                  | 1.50, 12.60        | 3.40, 9.20          |             |
|                      | 変化量  | 24 週            | n                         | 10                 | 12                  |             |
|                      |      |                 | Mean ± SD                 | 0.47 ± 1.22        | 0.14 ± 1.41         | 0.57        |
|                      |      |                 | Median [Q1, Q3]           | 0.65 [-0.40, 1.10] | -0.10 [-0.95, 1.30] | 0.47        |
|                      |      |                 | Min, Max                  | -1.30, 3.00        | -1.60, 2.40         |             |
|                      |      |                 | One-sample t-test         | 0.25               | 0.73                |             |
|                      |      |                 | Wilcoxon signed-rank test | 0.31               | 0.85                |             |
| 8-OHdG<br>(ng/mg・Cr) | 測定値  | 0 週             | n                         | 14                 | 16                  |             |
|                      |      |                 | Mean ± SD                 | 8.4 ± 3.7          | 7.5 ± 3.0           | 0.43        |
|                      |      |                 | Median [Q1, Q3]           | 7.6 [5.4, 11.2]    | 6.7 [5.8, 8.5]      | 0.56        |
|                      |      |                 | Min, Max                  | 3.4, 15.7          | 2.8, 13.5           |             |
|                      |      | 12 週            | n                         | 13                 | 16                  |             |
|                      |      |                 | Mean ± SD                 | 9.0 ± 3.8          | 8.2 ± 2.5           | 0.50        |
|                      |      |                 | Median [Q1, Q3]           | 8.0 [7.1, 10.3]    | 8.6 [5.8, 10.6]     | 0.88        |
|                      |      |                 | Min, Max                  | 3.6, 16.8          | 4.3, 11.5           |             |
|                      |      | 24 週            | n                         | 12                 | 15                  |             |
|                      |      |                 | Mean ± SD                 | 8.7 ± 4.3          | 10.8 ± 1.5          | 0.10        |
|                      |      |                 | Median [Q1, Q3]           | 8.5 [5.9, 9.6]     | 11.1 [10.0, 12.1]   | 0.016       |
|                      |      |                 | Min, Max                  | 4.1, 20.1          | 7.3, 12.7           |             |
|                      | 変化量  | 12 週            | n                         | 13                 | 16                  |             |
|                      |      |                 | Mean ± SD                 | 0.4 ± 2.7          | 0.8 ± 3.2           | 0.78        |
|                      |      |                 | Median [Q1, Q3]           | 1.7 [-1.0, 2.2]    | 0.8 [-1.3, 3.7]     | 0.71        |
|                      |      |                 | Min, Max                  | -5.8, 3.6          | -5.5, 5.4           |             |
|                      |      |                 | One-sample t-test         | 0.56               | 0.35                |             |
|                      |      |                 | Wilcoxon signed-rank test | 0.37               | 0.36                |             |
|                      |      | 24 週            | n                         | 12                 | 15                  |             |
|                      |      |                 | Mean ± SD                 | 0.2 ± 4.1          | 3.2 ± 3.3           | 0.047       |
|                      |      |                 | Median [Q1, Q3]           | 1.0 [-1.5, 2.5]    | 3.4 [1.2, 6.0]      | 0.05        |
|                      |      |                 | Min, Max                  | -9.9, 6.2          | -2.3, 8.3           |             |
|                      |      |                 | One-sample t-test         | 0.85               | 0.002               |             |
|                      |      |                 | Wilcoxon signed-rank test | 0.56               | 0.003               |             |
| 変化率                  | 12 週 | n               | 13                        | 16                 |                     |             |
|                      |      | Mean ± SD       | 14.4 ± 38.1               | 23.1 ± 49.7        | 0.60                |             |
|                      |      | Median [Q1, Q3] | 20.0 [-12.0, 31.5]        | 12.5 [-18.6, 72.1] | 0.78                |             |
|                      |      | Min, Max        | -61.7, 81.8               | -43.0, 94.7        |                     |             |
| One-sample t-test    | 0.20 | 0.08            |                           |                    |                     |             |

1. FAS から心房細動症例を除外した集団

1.3. ベースライン時 EF45%未満の部分集団での FMD、8-OHdG、XOR 活性、尿酸

|                                              |     |      |                           |                         |                      |       |
|----------------------------------------------|-----|------|---------------------------|-------------------------|----------------------|-------|
|                                              |     |      | Wilcoxon signed-rank test | 0.15                    | 0.16                 |       |
|                                              |     | 24 週 | n                         | 12                      | 15                   |       |
|                                              |     |      | Mean ±SD                  | 17.5 ±60.8              | 68.4 ±84.5           | 0.09  |
|                                              |     |      | Median [Q1, Q3]           | 13.4 [-14.6, 28.8]      | 55.9 [16.2, 89.6]    | 0.023 |
|                                              |     |      | Min, Max                  | -70.7, 182.4            | -18.0, 296.4         |       |
|                                              |     |      | One-sample t-test         | 0.34                    | 0.007                |       |
|                                              |     |      | Wilcoxon signed-rank test | 0.34                    | 0.001                |       |
| XOR 活性<br>(pmol/h/mL<br>plasma)              | 測定値 | 0 週  | n                         | 14                      | 16                   |       |
|                                              |     |      | Mean ±SD                  | 50.3 ±43.6              | 47.4 ±51.6           | 0.87  |
|                                              |     |      | Median [Q1, Q3]           | 36.4 [22.7, 51.3]       | 30.9 [16.7, 53.3]    | 0.37  |
|                                              |     |      | Min, Max                  | 13.6, 170.0             | 6.7, 201.0           |       |
|                                              |     | 24 週 | n                         | 12                      | 15                   |       |
|                                              |     |      | Mean ±SD                  | 38.5 ±68.4              | 31.4 ±61.0           | 0.78  |
|                                              |     |      | Median [Q1, Q3]           | 14.9 [9.2, 30.3]        | 9.2 [6.7, 27.8]      | 0.26  |
|                                              |     |      | Min, Max                  | 6.7, 250.0              | 6.7, 246.0           |       |
|                                              | 変化量 | 24 週 | n                         | 12                      | 15                   |       |
|                                              |     |      | Mean ±SD                  | -15.1 ±71.8             | -18.8 ±60.8          | 0.89  |
|                                              |     |      | Median [Q1, Q3]           | -18.5 [-33.9, -5.1]     | -19.2 [-28.8, -4.5]  | 0.88  |
|                                              |     |      | Min, Max                  | -110.2, 182.2           | -174.1, 138.0        |       |
|                                              |     |      | One-sample t-test         | 0.48                    | 0.25                 |       |
|                                              |     |      | Wilcoxon signed-rank test | 0.034                   | 0.010                |       |
|                                              | 変化率 | 24 週 | n                         | 12                      | 15                   |       |
|                                              |     |      | Mean ±SD                  | -28.8 ±96.9             | -43.2 ±53.7          | 0.63  |
|                                              |     |      | Median [Q1, Q3]           | -61.4 [-71.2,<br>-29.9] | -63.1 [-73.5, -32.3] | 0.90  |
|                                              |     |      | Min, Max                  | -84.0, 268.7            | -86.6, 127.8         |       |
| One-sample t-test                            |     |      | 0.32                      | 0.008                   |                      |       |
| Wilcoxon signed-rank test                    |     |      | 0.034                     | 0.013                   |                      |       |
| 対数変換 XOR<br>活性 (ln<br>(pmol/h/mL<br>plasma)) | 測定値 | 0 週  | n                         | 14                      | 16                   |       |
|                                              |     |      | Mean ±SD                  | 3.7 ±0.7                | 3.4 ±1.0             | 0.42  |
|                                              |     |      | Median [Q1, Q3]           | 3.6 [3.1, 3.9]          | 3.4 [2.8, 3.9]       | 0.37  |
|                                              |     |      | Min, Max                  | 2.6, 5.1                | 1.9, 5.3             |       |
|                                              |     | 24 週 | n                         | 12                      | 15                   |       |
|                                              |     |      | Mean ±SD                  | 2.9 ±1.1                | 2.7 ±1.1             | 0.53  |
|                                              |     |      | Median [Q1, Q3]           | 2.7 [2.2, 3.4]          | 2.2 [1.9, 3.3]       | 0.26  |
|                                              |     |      | Min, Max                  | 1.9, 5.5                | 1.9, 5.5             |       |
|                                              | 変化量 | 24 週 | n                         | 12                      | 15                   |       |
|                                              |     |      | Mean ±SD                  | -0.8 ±0.9               | -0.8 ±0.7            | 0.83  |
|                                              |     |      | Median [Q1, Q3]           | -1.0 [-1.3, -0.4]       | -1.0 [-1.3, -0.4]    | 0.90  |
|                                              |     |      | Min, Max                  | -1.8, 1.3               | -2.0, 0.8            |       |
|                                              |     |      | One-sample t-test         | 0.009                   | <0.001               |       |
|                                              |     |      | Wilcoxon signed-rank test | 0.016                   | 0.001                |       |
|                                              | 変化率 | 24 週 | n                         | 12                      | 15                   |       |
|                                              |     |      | Mean ±SD                  | -21.3 ±21.2             | -24.4 ±18.3          | 0.69  |
|                                              |     |      | Median [Q1, Q3]           | -25.6 [-34.7,<br>-11.7] | -31.5 [-35.7, -9.3]  | 0.61  |
|                                              |     |      | Min, Max                  | -44.1, 30.9             | -46.5, 17.6          |       |
| One-sample t-test                            |     |      | 0.005                     | <0.001                  |                      |       |
| Wilcoxon signed-rank test                    |     |      | 0.012                     | <0.001                  |                      |       |

1. FAS から心房細動症例を除外した集団

1.3. ベースライン時 EF45%未満の部分集団での FMD、8-OHdG、XOR 活性、尿酸

|                           |     |      |                           |                   |                   |      |
|---------------------------|-----|------|---------------------------|-------------------|-------------------|------|
| 血中尿酸値<br>(mg/dL)          | 測定値 | 0 週  | n                         | 14                | 16                |      |
|                           |     |      | Mean ± SD                 | 8.8 ± 1.6         | 8.6 ± 1.5         | 0.75 |
|                           |     |      | Median [Q1, Q3]           | 8.7 [7.2, 10.2]   | 8.5 [7.6, 9.2]    | 0.85 |
|                           |     |      | Min, Max                  | 6.9, 11.9         | 6.7, 11.6         |      |
|                           |     | 12 週 | n                         | 13                | 16                |      |
|                           |     |      | Mean ± SD                 | 6.0 ± 1.3         | 6.0 ± 0.9         | 0.95 |
|                           |     |      | Median [Q1, Q3]           | 6.1 [5.3, 6.8]    | 6.0 [5.5, 6.6]    | 1.00 |
|                           |     |      | Min, Max                  | 3.9, 8.7          | 4.5, 7.4          |      |
|                           |     | 24 週 | n                         | 12                | 15                |      |
|                           |     |      | Mean ± SD                 | 6.2 ± 1.3         | 6.0 ± 0.9         | 0.62 |
|                           |     |      | Median [Q1, Q3]           | 6.6 [4.8, 7.4]    | 6.0 [5.2, 6.5]    | 0.73 |
|                           |     |      | Min, Max                  | 4.5, 7.8          | 4.7, 7.9          |      |
|                           | 変化量 | 12 週 | n                         | 13                | 16                |      |
|                           |     |      | Mean ± SD                 | -2.6 ± 1.2        | -2.6 ± 1.3        | 0.95 |
|                           |     |      | Median [Q1, Q3]           | -2.2 [-3.3, -1.7] | -2.3 [-3.5, -1.8] | 0.86 |
|                           |     |      | Min, Max                  | -5.3, -1.2        | -5.0, -1.0        |      |
|                           |     |      | One-sample t-test         | <0.001            | <0.001            |      |
|                           |     |      | Wilcoxon signed-rank test | <0.001            | <0.001            |      |
|                           |     | 24 週 | n                         | 12                | 15                |      |
|                           |     |      | Mean ± SD                 | -2.2 ± 1.3        | -2.4 ± 1.3        | 0.58 |
| Median [Q1, Q3]           |     |      | -2.6 [-2.8, -1.3]         | -2.2 [-3.1, -1.7] | 0.86              |      |
| Min, Max                  |     |      | -4.6, 0.0                 | -5.7, -0.4        |                   |      |
| One-sample t-test         |     |      | <0.001                    | <0.001            |                   |      |
| Wilcoxon signed-rank test |     |      | <0.001                    | <0.001            |                   |      |

表 1.3.2. [FAS] ベースライン時 EF45%未満の部分集団での FMD の変化量と EndoPAT の変化量の相関

| 変数 1            | 変数 2                        | n  | Pearson            |      | Spearman           |      |
|-----------------|-----------------------------|----|--------------------|------|--------------------|------|
|                 |                             |    | 相関係数<br>(95%CI)    | P 値  | 相関係数<br>(95%CI)    | P 値  |
| FMD (%) 24 週変化量 | EndoPAT (RHI 指数)<br>24 週変化量 | 22 | 0.26 (-0.19, 0.61) | 0.25 | 0.36 (-0.08, 0.67) | 0.10 |



1. FAS から心房細動症例を除外した集団

1.4. ベースライン時 EF50%以上の部分集団での FMD、8-OHdG、XOR 活性、尿酸

1.4. ベースライン時 EF50%以上の部分集団での FMD、8-OHdG、XOR 活性、尿酸

表 1.4.1. [FAS] ベースライン時 EF50%以上の部分集団での FMD、8-OHdG、XOR 活性、尿酸

| 変数                   |       | 観察<br>ポイント      | 統計量                       | トピロキソスタット群         | アロプリノール群            | 群間比較<br>P 値 |
|----------------------|-------|-----------------|---------------------------|--------------------|---------------------|-------------|
| FMD (%)              | 測定値   | 0 週             | n                         | 17                 | 14                  |             |
|                      |       |                 | Mean ± SD                 | 4.54 ± 2.00        | 4.53 ± 2.41         | 0.99        |
|                      |       |                 | Median [Q1, Q3]           | 4.60 [3.30, 5.50]  | 4.75 [2.40, 5.50]   | 1.00        |
|                      |       |                 | Min, Max                  | 1.70, 9.20         | 1.30, 10.80         |             |
|                      |       | 24 週            | n                         | 17                 | 12                  |             |
|                      |       |                 | Mean ± SD                 | 4.39 ± 1.96        | 4.10 ± 1.61         | 0.67        |
|                      |       |                 | Median [Q1, Q3]           | 3.70 [3.00, 5.60]  | 4.15 [2.85, 5.40]   | 0.96        |
|                      |       |                 | Min, Max                  | 1.70, 9.80         | 1.60, 6.20          |             |
|                      | 変化量   | 24 週            | n                         | 17                 | 12                  |             |
|                      |       |                 | Mean ± SD                 | -0.14 ± 1.54       | -0.89 ± 1.77        | 0.24        |
|                      |       |                 | Median [Q1, Q3]           | 0.30 [-0.90, 1.00] | -0.60 [-1.35, 0.05] | 0.22        |
|                      |       |                 | Min, Max                  | -4.30, 2.10        | -5.60, 1.30         |             |
|                      |       |                 | One-sample t-test         | 0.71               | 0.11                |             |
|                      |       |                 | Wilcoxon signed-rank test | 0.97               | 0.11                |             |
| 8-OHdG<br>(ng/mg・Cr) | 測定値   | 0 週             | n                         | 22                 | 23                  |             |
|                      |       |                 | Mean ± SD                 | 7.6 ± 2.5          | 7.2 ± 3.8           | 0.73        |
|                      |       |                 | Median [Q1, Q3]           | 7.3 [5.6, 9.4]     | 6.1 [4.8, 9.2]      | 0.33        |
|                      |       |                 | Min, Max                  | 4.3, 13.0          | 2.6, 19.9           |             |
|                      |       | 12 週            | n                         | 22                 | 21                  |             |
|                      |       |                 | Mean ± SD                 | 9.1 ± 3.8          | 11.9 ± 8.1          | 0.15        |
|                      |       |                 | Median [Q1, Q3]           | 8.4 [6.5, 11.1]    | 9.2 [7.0, 14.3]     | 0.32        |
|                      |       |                 | Min, Max                  | 4.1, 19.4          | 4.9, 37.9           |             |
|                      |       | 24 週            | n                         | 22                 | 21                  |             |
|                      |       |                 | Mean ± SD                 | 9.2 ± 4.7          | 11.4 ± 5.7          | 0.17        |
|                      |       |                 | Median [Q1, Q3]           | 8.4 [5.6, 10.5]    | 10.0 [7.3, 14.7]    | 0.11        |
|                      |       |                 | Min, Max                  | 4.6, 24.9          | 3.6, 25.6           |             |
|                      | 変化量   | 12 週            | n                         | 22                 | 21                  |             |
|                      |       |                 | Mean ± SD                 | 1.5 ± 3.4          | 4.3 ± 6.0           | 0.06        |
|                      |       |                 | Median [Q1, Q3]           | 1.0 [-0.4, 3.2]    | 2.6 [0.5, 5.6]      | 0.044       |
|                      |       |                 | Min, Max                  | -5.7, 9.6          | -1.1, 27.3          |             |
|                      |       |                 | One-sample t-test         | 0.048              | 0.003               |             |
|                      |       |                 | Wilcoxon signed-rank test | 0.039              | <0.001              |             |
|                      |       | 24 週            | n                         | 22                 | 21                  |             |
|                      |       |                 | Mean ± SD                 | 1.6 ± 3.7          | 3.9 ± 3.3           | 0.037       |
|                      |       |                 | Median [Q1, Q3]           | 1.0 [-0.4, 3.9]    | 3.8 [1.8, 5.9]      | 0.022       |
|                      |       |                 | Min, Max                  | -3.9, 11.9         | -1.7, 10.6          |             |
|                      |       |                 | One-sample t-test         | 0.0495             | <0.001              |             |
|                      |       |                 | Wilcoxon signed-rank test | 0.08               | <0.001              |             |
| 変化率                  | 12 週  | n               | 22                        | 21                 |                     |             |
|                      |       | Mean ± SD       | 26.0 ± 52.7               | 59.2 ± 66.4        | 0.08                |             |
|                      |       | Median [Q1, Q3] | 17.0 [-5.9, 38.1]         | 47.4 [9.1, 79.3]   | 0.042               |             |
|                      |       | Min, Max        | -46.7, 158.1              | -13.9, 257.5       |                     |             |
| One-sample t-test    | 0.031 | <0.001          |                           |                    |                     |             |

1. FAS から心房細動症例を除外した集団

1.4. ベースライン時 EF50%以上の部分集団での FMD、8-OHdG、XOR 活性、尿酸

|                                              |        |                           |                           |                      |                      |       |
|----------------------------------------------|--------|---------------------------|---------------------------|----------------------|----------------------|-------|
|                                              |        |                           | Wilcoxon signed-rank test | 0.036                | <0.001               |       |
|                                              |        | 24 週                      | n                         | 22                   | 21                   |       |
|                                              |        |                           | Mean ±SD                  | 25.0 ±50.8           | 60.4 ±56.4           | 0.036 |
|                                              |        |                           | Median [Q1, Q3]           | 11.6 [-5.5, 39.8]    | 41.9 [29.0, 84.4]    | 0.016 |
|                                              |        |                           | Min, Max                  | -32.0, 151.2         | -25.0, 194.7         |       |
|                                              |        |                           | One-sample t-test         | 0.032                | <0.001               |       |
|                                              |        |                           | Wilcoxon signed-rank test | 0.06                 | <0.001               |       |
| XOR 活性<br>(pmol/h/mL<br>plasma)              | 測定値    | 0 週                       | n                         | 22                   | 23                   |       |
|                                              |        |                           | Mean ±SD                  | 51.2 ±36.0           | 53.5 ±76.4           | 0.90  |
|                                              |        |                           | Median [Q1, Q3]           | 40.5 [29.3, 54.8]    | 23.8 [17.3, 49.9]    | 0.047 |
|                                              |        |                           | Min, Max                  | 16.3, 152.0          | 7.5, 329.0           |       |
|                                              |        | 24 週                      | n                         | 22                   | 21                   |       |
|                                              |        |                           | Mean ±SD                  | 21.8 ±19.1           | 23.1 ±31.4           | 0.87  |
|                                              | 変化量    | 24 週                      | n                         | 22                   | 21                   |       |
|                                              |        |                           | Mean ±SD                  | -29.4 ±31.5          | -33.4 ±54.6          | 0.77  |
|                                              |        |                           | Median [Q1, Q3]           | -19.8 [-41.5, -13.2] | -12.6 [-30.5, -8.2]  | 0.36  |
|                                              |        |                           | Min, Max                  | -124.6, 14.6         | -241.9, 7.6          |       |
|                                              |        |                           | One-sample t-test         | <0.001               | 0.011                |       |
|                                              |        | Wilcoxon signed-rank test | <0.001                    | <0.001               |                      |       |
|                                              | 変化率    | 24 週                      | n                         | 22                   | 21                   |       |
|                                              |        |                           | Mean ±SD                  | -53.3 ±32.6          | -45.9 ±34.3          | 0.47  |
|                                              |        |                           | Median [Q1, Q3]           | -58.2 [-80.0, -48.1] | -51.5 [-64.9, -39.3] | 0.19  |
| Min, Max                                     |        |                           | -92.8, 28.6               | -90.9, 81.4          |                      |       |
| One-sample t-test                            |        |                           | <0.001                    | <0.001               |                      |       |
| Wilcoxon signed-rank test                    | <0.001 | <0.001                    |                           |                      |                      |       |
| 対数変換 XOR<br>活性 (ln<br>(pmol/h/mL<br>plasma)) | 測定値    | 0 週                       | n                         | 22                   | 23                   |       |
|                                              |        |                           | Mean ±SD                  | 3.8 ±0.6             | 3.4 ±1.0             | 0.17  |
|                                              |        |                           | Median [Q1, Q3]           | 3.7 [3.4, 4.0]       | 3.2 [2.9, 3.9]       | 0.047 |
|                                              |        |                           | Min, Max                  | 2.8, 5.0             | 2.0, 5.8             |       |
|                                              |        | 24 週                      | n                         | 22                   | 21                   |       |
|                                              |        |                           | Mean ±SD                  | 2.8 ±0.8             | 2.7 ±0.9             | 0.76  |
|                                              | 変化量    | 24 週                      | n                         | 22                   | 21                   |       |
|                                              |        |                           | Mean ±SD                  | -1.0 ±0.7            | -0.8 ±0.6            | 0.25  |
|                                              |        |                           | Median [Q1, Q3]           | -0.9 [-1.6, -0.7]    | -0.7 [-1.0, -0.5]    | 0.19  |
|                                              |        |                           | Min, Max                  | -2.6, 0.3            | -2.4, 0.6            |       |
|                                              |        |                           | One-sample t-test         | <0.001               | <0.001               |       |
|                                              |        | Wilcoxon signed-rank test | <0.001                    | <0.001               |                      |       |
|                                              | 変化率    | 24 週                      | n                         | 22                   | 21                   |       |
|                                              |        |                           | Mean ±SD                  | -26.3 ±18.0          | -20.9 ±15.4          | 0.30  |
|                                              |        |                           | Median [Q1, Q3]           | -24.8 [-41.9, -15.7] | -22.2 [-24.2, -16.9] | 0.34  |
| Min, Max                                     |        |                           | -58.1, 6.4                | -55.8, 26.6          |                      |       |
| One-sample t-test                            | <0.001 | <0.001                    |                           |                      |                      |       |

1. FAS から心房細動症例を除外した集団

1.4. ベースライン時 EF50%以上の部分集団での FMD、8-OHdG、XOR 活性、尿酸

| 血中尿酸値<br>(mg/dL) | 測定値 | 0 週  | Wilcoxon signed-rank test | <0.001            | <0.001            |                   |      |
|------------------|-----|------|---------------------------|-------------------|-------------------|-------------------|------|
|                  |     |      | n                         | 21                | 23                |                   |      |
|                  |     |      | Mean ± SD                 | 8.2 ± 1.5         | 8.2 ± 1.7         | 0.91              |      |
|                  |     |      | Median [Q1, Q3]           | 8.1 [7.2, 9.2]    | 7.9 [7.0, 9.1]    | 0.79              |      |
|                  |     |      | Min, Max                  | 5.7, 11.6         | 6.0, 12.4         |                   |      |
|                  |     | 12 週 | n                         | 22                | 23                |                   |      |
|                  |     |      | Mean ± SD                 | 5.4 ± 0.9         | 5.7 ± 1.3         | 0.42              |      |
|                  |     |      | Median [Q1, Q3]           | 5.5 [5.0, 5.8]    | 5.7 [4.9, 6.0]    | 0.52              |      |
|                  |     |      | Min, Max                  | 3.8, 7.6          | 3.6, 9.0          |                   |      |
|                  |     | 24 週 | n                         | 22                | 22                |                   |      |
|                  |     |      | Mean ± SD                 | 5.4 ± 1.1         | 5.9 ± 1.5         | 0.19              |      |
|                  |     |      | Median [Q1, Q3]           | 5.5 [4.8, 6.0]    | 5.9 [5.0, 6.4]    | 0.26              |      |
|                  |     |      | Min, Max                  | 3.6, 7.4          | 3.1, 9.7          |                   |      |
|                  | 変化量 | 12 週 | n                         | 21                | 23                |                   |      |
|                  |     |      |                           | Mean ± SD         | -2.8 ± 1.3        | -2.5 ± 1.6        | 0.44 |
|                  |     |      |                           | Median [Q1, Q3]   | -2.4 [-3.8, -2.0] | -2.3 [-3.2, -1.6] | 0.43 |
|                  |     |      |                           | Min, Max          | -5.5, -0.9        | -6.2, 0.7         |      |
|                  |     |      |                           | One-sample t-test | <0.001            | <0.001            |      |
|                  |     |      | Wilcoxon signed-rank test | <0.001            | <0.001            |                   |      |
|                  |     |      | 24 週                      | n                 | 21                | 22                |      |
|                  |     |      |                           | Mean ± SD         | -2.8 ± 1.7        | -2.3 ± 1.4        | 0.25 |
|                  |     |      |                           | Median [Q1, Q3]   | -2.3 [-3.4, -1.8] | -1.8 [-3.2, -1.2] | 0.13 |
|                  |     |      |                           | Min, Max          | -6.6, 0.6         | -5.7, -0.1        |      |
|                  |     |      |                           | One-sample t-test | <0.001            | <0.001            |      |
|                  |     |      | Wilcoxon signed-rank test | <0.001            | <0.001            |                   |      |

表 1.4.2. [FAS] ベースライン時 EF50%以上の部分集団での FMD の変化量と EndoPAT の変化量の相関

| 変数 1            | 変数 2                        | n  | Pearson            |      | Spearman           |      |
|-----------------|-----------------------------|----|--------------------|------|--------------------|------|
|                 |                             |    | 相関係数<br>(95%CI)    | P 値  | 相関係数<br>(95%CI)    | P 値  |
| FMD (%) 24 週変化量 | EndoPAT (RHI 指数)<br>24 週変化量 | 29 | 0.27 (-0.11, 0.58) | 0.15 | 0.25 (-0.14, 0.56) | 0.20 |

2. PPS から心房細動症例を除外した集団

2.1. トロポニン I

2. PPS から心房細動除症例を除外した集団

除外した心房細動症例の定義は、心不全の原疾患もしくは合併症に心房細動があり、かつ登録時の心電図検査でも心房細動の所見があった症例、とした。

2.1. トロポニン I

表 2.1.1. [PPS] トロポニン I

| 変数                           | 観察<br>ポイント | 統計量                       | トピロキソスタット群                | アロプリノール群           | 群間比較<br>P 値       |       |
|------------------------------|------------|---------------------------|---------------------------|--------------------|-------------------|-------|
| hs トロポニン I<br>(pg/mL)        | 測定値        | 0 週                       | n                         | 37                 | 43                |       |
|                              |            |                           | Mean ± SD                 | 25.7 ± 39.7        | 18.1 ± 24.2       | 0.30  |
|                              |            |                           | Median [Q1, Q3]           | 8.4 [4.9, 24.9]    | 7.9 [5.9, 19.5]   | 0.98  |
|                              |            |                           | Min, Max                  | 1.5, 152.7         | 1.6, 132.3        |       |
|                              |            | 12 週                      | n                         | 37                 | 41                |       |
|                              |            |                           | Mean ± SD                 | 35.0 ± 60.0        | 19.9 ± 33.5       | 0.17  |
|                              |            |                           | Median [Q1, Q3]           | 9.6 [4.6, 29.2]    | 8.9 [5.1, 21.0]   | 0.79  |
|                              |            |                           | Min, Max                  | 2.0, 294.8         | 1.1, 197.9        |       |
|                              |            | 24 週                      | n                         | 36                 | 40                |       |
|                              |            |                           | Mean ± SD                 | 27.1 ± 39.0        | 23.4 ± 58.9       | 0.74  |
|                              |            |                           | Median [Q1, Q3]           | 9.2 [5.4, 25.1]    | 7.7 [4.5, 21.2]   | 0.47  |
|                              |            |                           | Min, Max                  | 1.8, 145.0         | 1.5, 375.3        |       |
|                              | 変化量        | 12 週                      | n                         | 37                 | 41                |       |
|                              |            |                           | Mean ± SD                 | 9.4 ± 47.7         | 4.8 ± 30.4        | 0.61  |
|                              |            |                           | Median [Q1, Q3]           | 0.3 [-1.0, 3.3]    | 0.1 [-1.5, 1.1]   | 0.39  |
|                              |            |                           | Min, Max                  | -17.9, 287.7       | -18.9, 190.4      |       |
|                              |            |                           | One-sample t-test         | 0.24               | 0.32              |       |
|                              |            |                           | Wilcoxon signed-rank test | 0.20               | 0.82              |       |
|                              |            | 24 週                      | n                         | 36                 | 40                |       |
|                              |            |                           | Mean ± SD                 | 1.7 ± 16.0         | 7.5 ± 54.4        | 0.54  |
|                              |            |                           | Median [Q1, Q3]           | 1.2 [-0.7, 3.5]    | -0.5 [-2.8, 0.9]  | 0.018 |
|                              |            |                           | Min, Max                  | -68.9, 42.3        | -18.4, 340.7      |       |
|                              |            |                           | One-sample t-test         | 0.52               | 0.39              |       |
|                              |            |                           | Wilcoxon signed-rank test | 0.045              | 0.19              |       |
| 変化率                          | 12 週       | n                         | 37                        | 41                 |                   |       |
|                              |            | Mean ± SD                 | 119.6 ± 665.2             | 66.1 ± 397.3       | 0.66              |       |
|                              |            | Median [Q1, Q3]           | 6.4 [-8.8, 26.7]          | 1.9 [-18.5, 20.5]  | 0.29              |       |
|                              |            | Min, Max                  | -55.9, 4052.1             | -44.9, 2538.7      |                   |       |
|                              |            | One-sample t-test         | 0.28                      | 0.29               |                   |       |
|                              |            | Wilcoxon signed-rank test | 0.08                      | 0.62               |                   |       |
|                              | 24 週       | n                         | 36                        | 40                 |                   |       |
|                              |            | Mean ± SD                 | 19.8 ± 36.5               | 22.3 ± 160.1       | 0.93              |       |
|                              |            | Median [Q1, Q3]           | 20.1 [-7.1, 42.7]         | -8.7 [-24.2, 19.3] | 0.008             |       |
|                              |            | Min, Max                  | -49.4, 126.5              | -53.6, 984.7       |                   |       |
|                              |            | One-sample t-test         | 0.003                     | 0.38               |                   |       |
|                              |            | Wilcoxon signed-rank test | 0.002                     | 0.47               |                   |       |
| 対数変換 hs トロポニン I (ln (pg/mL)) | 測定値        | 0 週                       | n                         | 37                 | 43                |       |
|                              |            |                           | Mean ± SD                 | 2.42 ± 1.23        | 2.37 ± 0.99       | 0.83  |
|                              |            |                           | Median [Q1, Q3]           | 2.13 [1.59, 3.21]  | 2.07 [1.77, 2.97] | 0.98  |

2. PPS から心房細動症例を除外した集団

2.1. トロポニン I

|      |                 |                           |                     |                       |       |
|------|-----------------|---------------------------|---------------------|-----------------------|-------|
|      |                 | Min, Max                  | 0.41, 5.03          | 0.47, 4.89            |       |
| 12 週 | n               |                           | 37                  | 41                    |       |
|      | Mean ±SD        |                           | 2.58 ±1.33          | 2.36 ±1.06            | 0.42  |
|      | Median [Q1, Q3] |                           | 2.26 [1.53, 3.37]   | 2.19 [1.63, 3.04]     | 0.79  |
|      | Min, Max        |                           | 0.69, 5.69          | 0.10, 5.29            |       |
| 24 週 | n               |                           | 36                  | 40                    |       |
|      | Mean ±SD        |                           | 2.52 ±1.20          | 2.30 ±1.12            | 0.41  |
|      | Median [Q1, Q3] |                           | 2.22 [1.67, 3.22]   | 2.03 [1.49, 3.05]     | 0.47  |
|      | Min, Max        |                           | 0.59, 4.98          | 0.41, 5.93            |       |
| 変化量  | 12 週            | n                         | 37                  | 41                    |       |
|      |                 | Mean ±SD                  | 0.16 ±0.67          | 0.08 ±0.59            | 0.58  |
|      |                 | Median [Q1, Q3]           | 0.06 [-0.09, 0.24]  | 0.02 [-0.20, 0.19]    | 0.29  |
|      |                 | Min, Max                  | -0.82, 3.73         | -0.60, 3.27           |       |
|      |                 | One-sample t-test         | 0.17                | 0.41                  |       |
|      |                 | Wilcoxon signed-rank test | 0.14                | 0.88                  |       |
|      | 24 週            | n                         | 36                  | 40                    |       |
|      |                 | Mean ±SD                  | 0.13 ±0.33          | -0.02 ±0.53           | 0.13  |
|      |                 | Median [Q1, Q3]           | 0.18 [-0.07, 0.36]  | -0.09 [-0.28, 0.18]   | 0.008 |
|      |                 | Min, Max                  | -0.68, 0.82         | -0.77, 2.38           |       |
|      |                 | One-sample t-test         | 0.020               | 0.77                  |       |
|      |                 | Wilcoxon signed-rank test | 0.008               | 0.24                  |       |
| 変化率  | 12 週            | n                         | 37                  | 41                    |       |
|      |                 | Mean ±SD                  | 12.32 ±40.17        | 3.11 ±31.80           | 0.26  |
|      |                 | Median [Q1, Q3]           | 2.00 [-3.98, 8.68]  | 1.09 [-7.81, 7.22]    | 0.34  |
|      |                 | Min, Max                  | -42.69, 190.10      | -82.04, 162.43        |       |
|      |                 | One-sample t-test         | 0.07                | 0.53                  |       |
|      |                 | Wilcoxon signed-rank test | 0.15                | 0.76                  |       |
|      | 24 週            | n                         | 36                  | 40                    |       |
|      |                 | Mean ±SD                  | 10.48 ±21.33        | -1.29 ±21.67          | 0.020 |
|      |                 | Median [Q1, Q3]           | 7.63 [-1.53, 15.22] | -4.26 [-13.35, 11.23] | 0.011 |
|      |                 | Min, Max                  | -29.32, 66.80       | -44.54, 67.27         |       |
|      |                 | One-sample t-test         | 0.006               | 0.71                  |       |
|      |                 | Wilcoxon signed-rank test | 0.006               | 0.33                  |       |

2. PPS から心房細動症例を除外した集団  
 2.2. 心房細動症例を除外した部分集団での FMD

2.2. FMD

表 2.2.1. [PPS] FMD

| 変数      |     | 観察<br>ポイント | 統計量                       | トピロキソスタット群         | アロプリノール群            | 群間比較<br>P 値 |
|---------|-----|------------|---------------------------|--------------------|---------------------|-------------|
| FMD (%) | 測定値 | 0 週        | n                         | 29                 | 31                  |             |
|         |     |            | Mean ± SD                 | 4.84 ± 2.38        | 4.86 ± 2.27         | 0.97        |
|         |     |            | Median [Q1, Q3]           | 4.60 [3.10, 5.80]  | 4.80 [3.40, 5.80]   | 0.78        |
|         |     |            | Min, Max                  | 1.70, 11.50        | 1.10, 10.80         |             |
|         |     | 24 週       | n                         | 29                 | 29                  |             |
|         |     |            | Mean ± SD                 | 4.99 ± 2.51        | 4.54 ± 1.72         | 0.42        |
|         |     |            | Median [Q1, Q3]           | 4.00 [3.50, 6.10]  | 4.20 [3.40, 5.30]   | 0.77        |
|         |     |            | Min, Max                  | 1.50, 12.60        | 1.60, 9.20          |             |
|         | 変化量 | 24 週       | n                         | 28                 | 28                  |             |
|         |     |            | Mean ± SD                 | 0.13 ± 1.18        | -0.35 ± 1.49        | 0.19        |
|         |     |            | Median [Q1, Q3]           | 0.10 [-0.70, 1.00] | -0.35 [-0.95, 0.40] | 0.22        |
|         |     |            | Min, Max                  | -1.90, 3.00        | -5.60, 2.40         |             |
|         |     |            | One-sample t-test         | 0.57               | 0.22                |             |
|         |     |            | Wilcoxon signed-rank test | 0.63               | 0.20                |             |

表 2.2.2. [PPS] FMD の変化量と EndoPAT の変化量の相関

| 変数 1            | 変数 2                        | n  | Pearson            |      | Spearman           |      |
|-----------------|-----------------------------|----|--------------------|------|--------------------|------|
|                 |                             |    | 相関係数<br>(95%CI)    | P 値  | 相関係数<br>(95%CI)    | P 値  |
| FMD (%) 24 週変化量 | EndoPAT (RHI 指数)<br>24 週変化量 | 56 | 0.18 (-0.09, 0.42) | 0.18 | 0.21 (-0.06, 0.45) | 0.12 |

2. PPS から心房細動症例を除外した集団  
 2.3. ベースライン時 EF45%未満の部分集団での FMD、8-OHdG、XOR 活性、尿酸

2.3. ベースライン時 EF45%未満の部分集団での FMD、8-OHdG、XOR 活性、尿酸

表 2.3.1. [PPS] ベースライン時 EF45%未満の部分集団での FMD、8-OHdG、XOR 活性、尿酸

| 変数                   |      | 観察<br>ポイント      | 統計量                       | トピロキシostat群        | アロプリノール群            | 群間比較<br>P 値 |
|----------------------|------|-----------------|---------------------------|--------------------|---------------------|-------------|
| FMD (%)              | 測定値  | 0 週             | n                         | 11                 | 12                  |             |
|                      |      |                 | Mean ± SD                 | 5.55 ± 3.07        | 5.50 ± 2.39         | 0.96        |
|                      |      |                 | Median [Q1, Q3]           | 5.50 [2.90, 7.60]  | 5.20 [4.10, 6.75]   | 0.78        |
|                      |      |                 | Min, Max                  | 1.90, 11.50        | 1.10, 9.80          |             |
|                      |      | 24 週            | n                         | 11                 | 12                  |             |
|                      |      |                 | Mean ± SD                 | 6.06 ± 3.08        | 5.02 ± 1.98         | 0.34        |
|                      |      |                 | Median [Q1, Q3]           | 5.90 [4.00, 8.70]  | 4.15 [3.60, 5.85]   | 0.37        |
|                      |      |                 | Min, Max                  | 1.50, 12.60        | 3.40, 9.20          |             |
|                      | 変化量  | 24 週            | n                         | 10                 | 11                  |             |
|                      |      |                 | Mean ± SD                 | 0.47 ± 1.22        | -0.01 ± 1.37        | 0.41        |
|                      |      |                 | Median [Q1, Q3]           | 0.65 [-0.40, 1.10] | -0.20 [-1.00, 0.80] | 0.29        |
|                      |      |                 | Min, Max                  | -1.30, 3.00        | -1.60, 2.40         |             |
|                      |      |                 | One-sample t-test         | 0.25               | 0.98                |             |
|                      |      |                 | Wilcoxon signed-rank test | 0.31               | 0.79                |             |
| 8-OHdG<br>(ng/mg・Cr) | 測定値  | 0 週             | n                         | 13                 | 15                  |             |
|                      |      |                 | Mean ± SD                 | 8.6 ± 3.9          | 7.5 ± 3.1           | 0.43        |
|                      |      |                 | Median [Q1, Q3]           | 8.3 [5.4, 11.2]    | 6.7 [5.7, 9.2]      | 0.58        |
|                      |      |                 | Min, Max                  | 3.4, 15.7          | 2.8, 13.5           |             |
|                      |      | 12 週            | n                         | 13                 | 14                  |             |
|                      |      |                 | Mean ± SD                 | 9.0 ± 3.8          | 8.7 ± 2.4           | 0.77        |
|                      |      |                 | Median [Q1, Q3]           | 8.0 [7.1, 10.3]    | 8.8 [7.3, 10.9]     | 0.75        |
|                      |      |                 | Min, Max                  | 3.6, 16.8          | 4.3, 11.5           |             |
|                      |      | 24 週            | n                         | 12                 | 14                  |             |
|                      |      |                 | Mean ± SD                 | 8.7 ± 4.3          | 10.8 ± 1.6          | 0.11        |
|                      |      |                 | Median [Q1, Q3]           | 8.5 [5.9, 9.6]     | 11.4 [10.0, 12.1]   | 0.019       |
|                      |      |                 | Min, Max                  | 4.1, 20.1          | 7.3, 12.7           |             |
|                      | 変化量  | 12 週            | n                         | 13                 | 14                  |             |
|                      |      |                 | Mean ± SD                 | 0.4 ± 2.7          | 1.0 ± 3.3           | 0.61        |
|                      |      |                 | Median [Q1, Q3]           | 1.7 [-1.0, 2.2]    | 2.0 [-1.2, 3.8]     | 0.45        |
|                      |      |                 | Min, Max                  | -5.8, 3.6          | -5.5, 5.4           |             |
|                      |      |                 | One-sample t-test         | 0.56               | 0.26                |             |
|                      |      |                 | Wilcoxon signed-rank test | 0.37               | 0.27                |             |
|                      |      | 24 週            | n                         | 12                 | 14                  |             |
|                      |      |                 | Mean ± SD                 | 0.2 ± 4.1          | 3.2 ± 3.4           | 0.06        |
|                      |      |                 | Median [Q1, Q3]           | 1.0 [-1.5, 2.5]    | 3.4 [1.2, 6.0]      | 0.07        |
|                      |      |                 | Min, Max                  | -9.9, 6.2          | -2.3, 8.3           |             |
|                      |      |                 | One-sample t-test         | 0.85               | 0.004               |             |
|                      |      |                 | Wilcoxon signed-rank test | 0.56               | 0.005               |             |
| 変化率                  | 12 週 | n               | 13                        | 14                 |                     |             |
|                      |      | Mean ± SD       | 14.4 ± 38.1               | 29.1 ± 50.4        | 0.40                |             |
|                      |      | Median [Q1, Q3] | 20.0 [-12.0, 31.5]        | 31.1 [-16.0, 73.1] | 0.45                |             |
|                      |      | Min, Max        | -61.7, 81.8               | -43.0, 94.7        |                     |             |
| One-sample t-test    | 0.20 | 0.0496          |                           |                    |                     |             |

2. PPS から心房細動症例を除外した集団

2.3. ベースライン時 EF45%未満の部分集団での FMD、8-OHdG、XOR 活性、尿酸

|                                 |                                              |                 |                           |                      |                      |                |      |
|---------------------------------|----------------------------------------------|-----------------|---------------------------|----------------------|----------------------|----------------|------|
|                                 |                                              |                 | Wilcoxon signed-rank test | 0.15                 | 0.09                 |                |      |
|                                 |                                              | 24 週            | n                         | 12                   | 14                   |                |      |
|                                 |                                              |                 | Mean ±SD                  | 17.5 ±60.8           | 69.0 ±87.7           | 0.10           |      |
|                                 |                                              |                 | Median [Q1, Q3]           | 13.4 [-14.6, 28.8]   | 53.7 [16.2, 89.6]    | 0.033          |      |
|                                 |                                              |                 | Min, Max                  | -70.7, 182.4         | -18.0, 296.4         |                |      |
|                                 |                                              |                 | One-sample t-test         | 0.34                 | 0.011                |                |      |
|                                 |                                              |                 | Wilcoxon signed-rank test | 0.34                 | 0.002                |                |      |
| XOR 活性<br>(pmol/h/mL<br>plasma) | 測定値                                          | 0 週             | n                         | 13                   | 15                   |                |      |
|                                 |                                              |                 | Mean ±SD                  | 51.1 ±45.3           | 43.4 ±50.7           | 0.68           |      |
|                                 |                                              |                 | Median [Q1, Q3]           | 33.5 [22.7, 51.3]    | 28.3 [15.3, 41.1]    | 0.29           |      |
|                                 |                                              |                 | Min, Max                  | 13.6, 170.0          | 6.7, 201.0           |                |      |
|                                 |                                              | 24 週            | n                         | 12                   | 14                   |                |      |
|                                 |                                              |                 | Mean ±SD                  | 38.5 ±68.4           | 16.1 ±14.6           | 0.24           |      |
|                                 |                                              |                 | Median [Q1, Q3]           | 14.9 [9.2, 30.3]     | 8.0 [6.7, 26.9]      | 0.15           |      |
|                                 |                                              |                 | Min, Max                  | 6.7, 250.0           | 6.7, 47.8            |                |      |
|                                 | 変化量                                          | 24 週            | n                         | 12                   | 14                   |                |      |
|                                 |                                              |                 | Mean ±SD                  | -15.1 ±71.8          | -30.0 ±44.3          | 0.52           |      |
|                                 |                                              |                 | Median [Q1, Q3]           | -18.5 [-33.9, -5.1]  | -20.1 [-28.8, -8.6]  | 0.96           |      |
|                                 |                                              |                 | Min, Max                  | -110.2, 182.2        | -174.1, 0.0          |                |      |
|                                 |                                              | 24 週            | n                         | 12                   | 14                   |                |      |
|                                 |                                              |                 | Mean ±SD                  | -28.8 ±96.9          | -55.4 ±26.3          | 0.33           |      |
|                                 |                                              |                 | Median [Q1, Q3]           | -61.4 [-71.2, -29.9] | -63.1 [-73.5, -40.4] | 0.70           |      |
|                                 |                                              |                 | Min, Max                  | -84.0, 268.7         | -86.6, 0.0           |                |      |
|                                 | 対数変換 XOR<br>活性 (ln<br>(pmol/h/mL<br>plasma)) | 測定値             | 0 週                       | n                    | 13                   | 15             |      |
|                                 |                                              |                 |                           | Mean ±SD             | 3.7 ±0.7             | 3.3 ±0.9       | 0.30 |
|                                 |                                              |                 |                           | Median [Q1, Q3]      | 3.5 [3.1, 3.9]       | 3.3 [2.7, 3.7] | 0.29 |
|                                 |                                              |                 |                           | Min, Max             | 2.6, 5.1             | 1.9, 5.3       |      |
| 24 週                            |                                              |                 | n                         | 12                   | 14                   |                |      |
|                                 |                                              |                 | Mean ±SD                  | 2.9 ±1.1             | 2.5 ±0.8             | 0.20           |      |
|                                 |                                              |                 | Median [Q1, Q3]           | 2.7 [2.2, 3.4]       | 2.1 [1.9, 3.3]       | 0.15           |      |
|                                 |                                              |                 | Min, Max                  | 1.9, 5.5             | 1.9, 3.9             |                |      |
| 変化量                             | 24 週                                         | n               | 12                        | 14                   |                      |                |      |
|                                 |                                              | Mean ±SD        | -0.8 ±0.9                 | -1.0 ±0.6            | 0.52                 |                |      |
|                                 |                                              | Median [Q1, Q3] | -1.0 [-1.3, -0.4]         | -1.0 [-1.3, -0.5]    | 0.70                 |                |      |
|                                 |                                              | Min, Max        | -1.8, 1.3                 | -2.0, 0.0            |                      |                |      |
|                                 | 24 週                                         | n               | 12                        | 14                   |                      |                |      |
|                                 |                                              | Mean ±SD        | -21.3 ±21.2               | -27.4 ±14.7          | 0.40                 |                |      |
|                                 |                                              | Median [Q1, Q3] | -25.6 [-34.7, -11.7]      | -32.6 [-35.7, -17.4] | 0.43                 |                |      |
|                                 |                                              | Min, Max        | -44.1, 30.9               | -46.5, 0.0           |                      |                |      |
| 変化率                             | 24 週                                         | n               | 12                        | 14                   |                      |                |      |
|                                 |                                              | Mean ±SD        | -21.3 ±21.2               | -27.4 ±14.7          | 0.40                 |                |      |
|                                 |                                              | Median [Q1, Q3] | -25.6 [-34.7, -11.7]      | -32.6 [-35.7, -17.4] | 0.43                 |                |      |
|                                 |                                              | Min, Max        | -44.1, 30.9               | -46.5, 0.0           |                      |                |      |
|                                 |                                              |                 | One-sample t-test         | 0.005                | <0.001               |                |      |
|                                 |                                              |                 | Wilcoxon signed-rank test | 0.012                | <0.001               |                |      |



2. PPS から心房細動症例を除外した集団

2.3. ベースライン時 EF45%未満の部分集団での FMD、8-OHdG、XOR 活性、尿酸

|                           |     |      |                           |                   |                   |      |
|---------------------------|-----|------|---------------------------|-------------------|-------------------|------|
| 血中尿酸値<br>(mg/dL)          | 測定値 | 0 週  | n                         | 13                | 15                |      |
|                           |     |      | Mean ±SD                  | 8.6 ± 1.4         | 8.5 ± 1.4         | 0.86 |
|                           |     |      | Median [Q1, Q3]           | 8.4 [7.2, 10.1]   | 8.5 [7.5, 8.8]    | 0.89 |
|                           |     |      | Min, Max                  | 6.9, 10.6         | 6.7, 11.6         |      |
|                           |     | 12 週 | n                         | 13                | 14                |      |
|                           |     |      | Mean ±SD                  | 6.0 ± 1.3         | 6.0 ± 1.0         | 0.98 |
|                           |     |      | Median [Q1, Q3]           | 6.1 [5.3, 6.8]    | 5.9 [5.3, 6.8]    | 0.98 |
|                           |     |      | Min, Max                  | 3.9, 8.7          | 4.5, 7.4          |      |
|                           |     | 24 週 | n                         | 12                | 14                |      |
|                           |     |      | Mean ±SD                  | 6.2 ± 1.3         | 6.1 ± 0.9         | 0.72 |
|                           |     |      | Median [Q1, Q3]           | 6.6 [4.8, 7.4]    | 6.2 [5.3, 6.5]    | 0.80 |
|                           |     |      | Min, Max                  | 4.5, 7.8          | 4.7, 7.9          |      |
|                           | 変化量 | 12 週 | n                         | 13                | 14                |      |
|                           |     |      | Mean ±SD                  | -2.6 ± 1.2        | -2.3 ± 1.0        | 0.53 |
|                           |     |      | Median [Q1, Q3]           | -2.2 [-3.3, -1.7] | -2.2 [-2.7, -1.8] | 0.77 |
|                           |     |      | Min, Max                  | -5.3, -1.2        | -4.4, -1.0        |      |
|                           |     |      | One-sample t-test         | <0.001            | <0.001            |      |
|                           |     |      | Wilcoxon signed-rank test | <0.001            | <0.001            |      |
|                           |     | 24 週 | n                         | 12                | 14                |      |
|                           |     |      | Mean ±SD                  | -2.2 ± 1.3        | -2.2 ± 0.9        | 0.93 |
| Median [Q1, Q3]           |     |      | -2.6 [-2.8, -1.3]         | -2.2 [-3.0, -1.7] | 0.94              |      |
| Min, Max                  |     |      | -4.6, 0.0                 | -3.7, -0.4        |                   |      |
| One-sample t-test         |     |      | <0.001                    | <0.001            |                   |      |
| Wilcoxon signed-rank test |     |      | <0.001                    | <0.001            |                   |      |

表 2.3.2. [PPS] ベースライン時 EF45%未満の部分集団での FMD の変化量と EndoPAT の変化量の相関

| 変数 1            | 変数 2                        | n  | Pearson            |      | Spearman           |      |
|-----------------|-----------------------------|----|--------------------|------|--------------------|------|
|                 |                             |    | 相関係数<br>(95%CI)    | P 値  | 相関係数<br>(95%CI)    | P 値  |
| FMD (%) 24 週変化量 | EndoPAT (RHI 指数)<br>24 週変化量 | 21 | 0.20 (-0.26, 0.58) | 0.39 | 0.29 (-0.16, 0.64) | 0.20 |

## 2. PPS から心房細動症例を除外した集団

## 2.4. ベースライン時 EF50%以上の部分集団での FMD、8-OHdG、XOR 活性、尿酸

## 2.4. ベースライン時 EF50%以上の部分集団での FMD、8-OHdG、XOR 活性、尿酸

表 2.4.1. [PPS] ベースライン時 EF50%以上の部分集団での FMD、8-OHdG、XOR 活性、尿酸

| 変数                   |      | 観察<br>ポイント      | 統計量                       | トピロキシostat群        | アロプリノール群            | 群間比較<br>P 値 |
|----------------------|------|-----------------|---------------------------|--------------------|---------------------|-------------|
| FMD (%)              | 測定値  | 0 週             | n                         | 15                 | 13                  |             |
|                      |      |                 | Mean ± SD                 | 4.23 ± 1.89        | 4.78 ± 2.32         | 0.50        |
|                      |      |                 | Median [Q1, Q3]           | 4.00 [2.30, 5.20]  | 4.80 [3.40, 5.50]   | 0.45        |
|                      |      |                 | Min, Max                  | 1.70, 9.20         | 1.60, 10.80         |             |
|                      |      | 24 週            | n                         | 15                 | 12                  |             |
|                      |      |                 | Mean ± SD                 | 4.33 ± 2.04        | 4.10 ± 1.61         | 0.75        |
|                      |      |                 | Median [Q1, Q3]           | 3.70 [2.80, 5.60]  | 4.15 [2.85, 5.40]   | 0.96        |
|                      |      |                 | Min, Max                  | 1.70, 9.80         | 1.60, 6.20          |             |
|                      | 変化量  | 24 週            | n                         | 15                 | 12                  |             |
|                      |      |                 | Mean ± SD                 | 0.10 ± 1.19        | -0.89 ± 1.77        | 0.09        |
|                      |      |                 | Median [Q1, Q3]           | 0.30 [-0.90, 1.00] | -0.60 [-1.35, 0.05] | 0.16        |
|                      |      |                 | Min, Max                  | -1.90, 2.10        | -5.60, 1.30         |             |
|                      |      |                 | One-sample t-test         | 0.75               | 0.11                |             |
|                      |      |                 | Wilcoxon signed-rank test | 0.73               | 0.11                |             |
| 8-OHdG<br>(ng/mg・Cr) | 測定値  | 0 週             | n                         | 20                 | 22                  |             |
|                      |      |                 | Mean ± SD                 | 7.9 ± 2.5          | 7.5 ± 3.8           | 0.68        |
|                      |      |                 | Median [Q1, Q3]           | 7.6 [6.3, 9.6]     | 6.5 [5.0, 9.2]      | 0.26        |
|                      |      |                 | Min, Max                  | 4.3, 13.0          | 3.3, 19.9           |             |
|                      |      | 12 週            | n                         | 20                 | 21                  |             |
|                      |      |                 | Mean ± SD                 | 9.1 ± 3.9          | 11.9 ± 8.1          | 0.18        |
|                      |      |                 | Median [Q1, Q3]           | 8.4 [6.5, 11.1]    | 9.2 [7.0, 14.3]     | 0.35        |
|                      |      |                 | Min, Max                  | 4.1, 19.4          | 4.9, 37.9           |             |
|                      |      | 24 週            | n                         | 20                 | 21                  |             |
|                      |      |                 | Mean ± SD                 | 9.2 ± 4.9          | 11.4 ± 5.7          | 0.19        |
|                      |      |                 | Median [Q1, Q3]           | 8.4 [5.5, 10.7]    | 10.0 [7.3, 14.7]    | 0.11        |
|                      |      |                 | Min, Max                  | 4.6, 24.9          | 3.6, 25.6           |             |
|                      | 変化量  | 12 週            | n                         | 20                 | 21                  |             |
|                      |      |                 | Mean ± SD                 | 1.3 ± 3.3          | 4.3 ± 6.0           | 0.05        |
|                      |      |                 | Median [Q1, Q3]           | 1.0 [-0.5, 2.8]    | 2.6 [0.5, 5.6]      | 0.024       |
|                      |      |                 | Min, Max                  | -5.7, 9.6          | -1.1, 27.3          |             |
|                      |      |                 | One-sample t-test         | 0.10               | 0.003               |             |
|                      |      |                 | Wilcoxon signed-rank test | 0.10               | <0.001              |             |
|                      |      | 24 週            | n                         | 20                 | 21                  |             |
|                      |      |                 | Mean ± SD                 | 1.4 ± 3.7          | 3.9 ± 3.3           | 0.024       |
|                      |      |                 | Median [Q1, Q3]           | 0.7 [-1.0, 3.0]    | 3.8 [1.8, 5.9]      | 0.011       |
|                      |      |                 | Min, Max                  | -3.9, 11.9         | -1.7, 10.6          |             |
|                      |      |                 | One-sample t-test         | 0.12               | <0.001              |             |
|                      |      |                 | Wilcoxon signed-rank test | 0.21               | <0.001              |             |
| 変化率                  | 12 週 | n               | 20                        | 21                 |                     |             |
|                      |      | Mean ± SD       | 19.8 ± 46.1               | 59.2 ± 66.4        | 0.034               |             |
|                      |      | Median [Q1, Q3] | 14.2 [-6.9, 36.7]         | 47.4 [9.1, 79.3]   | 0.020               |             |
|                      |      | Min, Max        | -46.7, 158.1              | -13.9, 257.5       |                     |             |
| One-sample t-test    | 0.07 | <0.001          |                           |                    |                     |             |

2. PPS から心房細動症例を除外した集団

2.4. ベースライン時 EF50%以上の部分集団での FMD、8-OHdG、XOR 活性、尿酸

|                                              |     |      |                           |                      |                      |        |  |
|----------------------------------------------|-----|------|---------------------------|----------------------|----------------------|--------|--|
|                                              |     |      | Wilcoxon signed-rank test | 0.11                 | <0.001               |        |  |
|                                              |     | 24 週 | n                         | 20                   | 21                   |        |  |
|                                              |     |      | Mean ±SD                  | 17.7 ±46.0           | 60.4 ±56.4           | 0.012  |  |
|                                              |     |      | Median [Q1, Q3]           | 11.0 [-14.7, 34.6]   | 41.9 [29.0, 84.4]    | 0.004  |  |
|                                              |     |      | Min, Max                  | -32.0, 151.2         | -25.0, 194.7         |        |  |
|                                              |     |      | One-sample t-test         | 0.10                 | <0.001               |        |  |
|                                              |     |      | Wilcoxon signed-rank test | 0.18                 | <0.001               |        |  |
| XOR 活性<br>(pmol/h/mL<br>plasma)              | 測定値 | 0 週  | n                         | 20                   | 22                   |        |  |
|                                              |     |      | Mean ±SD                  | 53.6 ±36.9           | 54.9 ±77.8           | 0.94   |  |
|                                              |     |      | Median [Q1, Q3]           | 40.9 [30.4, 58.2]    | 24.4 [17.3, 49.9]    | 0.045  |  |
|                                              |     |      | Min, Max                  | 16.3, 152.0          | 7.5, 329.0           |        |  |
|                                              |     | 24 週 | n                         | 20                   | 21                   |        |  |
|                                              |     |      | Mean ±SD                  | 23.1 ±19.6           | 23.1 ±31.4           | 1.00   |  |
|                                              | 変化量 | 24 週 | n                         | 20                   | 21                   |        |  |
|                                              |     |      | Mean ±SD                  | -30.5 ±32.8          | -33.4 ±54.6          | 0.84   |  |
|                                              |     |      | Median [Q1, Q3]           | -19.8 [-42.9, -14.6] | -12.6 [-30.5, -8.2]  | 0.33   |  |
|                                              |     |      | Min, Max                  | -124.6, 14.6         | -241.9, 7.6          |        |  |
|                                              |     | 24 週 | One-sample t-test         | <0.001               | 0.011                |        |  |
|                                              |     |      | Wilcoxon signed-rank test | <0.001               | <0.001               |        |  |
|                                              | 変化率 | 24 週 | n                         | 20                   | 21                   |        |  |
|                                              |     |      | Mean ±SD                  | -52.2 ±33.7          | -45.9 ±34.3          | 0.55   |  |
|                                              |     |      | Median [Q1, Q3]           | -58.2 [-80.0, -43.0] | -51.5 [-64.9, -39.3] | 0.24   |  |
|                                              |     |      | Min, Max                  | -92.8, 28.6          | -90.9, 81.4          |        |  |
|                                              |     | 24 週 | One-sample t-test         | <0.001               | <0.001               |        |  |
|                                              |     |      | Wilcoxon signed-rank test | <0.001               | <0.001               |        |  |
| 対数変換 XOR<br>活性 (ln<br>(pmol/h/mL<br>plasma)) | 測定値 | 0 週  | n                         | 20                   | 22                   |        |  |
|                                              |     |      | Mean ±SD                  | 3.8 ±0.6             | 3.4 ±1.0             | 0.16   |  |
|                                              |     |      | Median [Q1, Q3]           | 3.7 [3.4, 4.1]       | 3.2 [2.9, 3.9]       | 0.045  |  |
|                                              |     |      | Min, Max                  | 2.8, 5.0             | 2.0, 5.8             |        |  |
|                                              |     | 24 週 | n                         | 20                   | 21                   |        |  |
|                                              |     |      | Mean ±SD                  | 2.8 ±0.8             | 2.7 ±0.9             | 0.59   |  |
|                                              | 変化量 | 24 週 | n                         | 20                   | 21                   |        |  |
|                                              |     |      | Mean ±SD                  | -1.0 ±0.7            | -0.8 ±0.6            | 0.30   |  |
|                                              |     |      | Median [Q1, Q3]           | -0.9 [-1.6, -0.6]    | -0.7 [-1.0, -0.5]    | 0.24   |  |
|                                              |     |      | Min, Max                  | -2.6, 0.3            | -2.4, 0.6            |        |  |
|                                              |     | 24 週 | One-sample t-test         | <0.001               | <0.001               |        |  |
|                                              |     |      | Wilcoxon signed-rank test | <0.001               | <0.001               |        |  |
|                                              | 変化率 | 24 週 | n                         | 20                   | 21                   |        |  |
|                                              |     |      | Mean ±SD                  | -25.5 ±18.3          | -20.9 ±15.4          | 0.39   |  |
|                                              |     |      | Median [Q1, Q3]           | -24.8 [-40.5, -13.3] | -22.2 [-24.2, -16.9] | 0.43   |  |
|                                              |     |      | Min, Max                  | -58.1, 6.4           | -55.8, 26.6          |        |  |
|                                              |     |      |                           | One-sample t-test    | <0.001               | <0.001 |  |

2. PPS から心房細動症例を除外した集団

2.4. ベースライン時 EF50%以上の部分集団での FMD、8-OHdG、XOR 活性、尿酸

| 血中尿酸値<br>(mg/dL) | 測定値 | 0 週  | Wilcoxon signed-rank test | <0.001                    | <0.001            |                   |      |
|------------------|-----|------|---------------------------|---------------------------|-------------------|-------------------|------|
|                  |     |      | n                         | 19                        | 22                |                   |      |
|                  |     |      | Mean ± SD                 | 8.2 ± 1.5                 | 8.2 ± 1.7         | 0.98              |      |
|                  |     |      | Median [Q1, Q3]           | 8.1 [7.2, 9.2]            | 8.0 [7.0, 9.1]    | 0.85              |      |
|                  |     |      | Min, Max                  | 5.7, 11.6                 | 6.0, 12.4         |                   |      |
|                  |     | 12 週 | n                         | 20                        | 22                |                   |      |
|                  |     |      | Mean ± SD                 | 5.3 ± 0.8                 | 5.8 ± 1.3         | 0.20              |      |
|                  |     |      | Median [Q1, Q3]           | 5.5 [4.9, 5.8]            | 5.8 [5.0, 6.0]    | 0.31              |      |
|                  |     |      | Min, Max                  | 3.8, 6.7                  | 3.6, 9.0          |                   |      |
|                  |     | 24 週 | n                         | 20                        | 21                |                   |      |
|                  |     |      | Mean ± SD                 | 5.3 ± 1.0                 | 6.0 ± 1.4         | 0.05              |      |
|                  |     |      | Median [Q1, Q3]           | 5.4 [4.7, 6.0]            | 5.9 [5.2, 6.4]    | 0.09              |      |
|                  |     |      | Min, Max                  | 3.6, 7.3                  | 3.6, 9.7          |                   |      |
|                  | 変化量 | 12 週 | n                         | 19                        | 22                |                   |      |
|                  |     |      |                           | Mean ± SD                 | -2.9 ± 1.3        | -2.4 ± 1.6        | 0.32 |
|                  |     |      |                           | Median [Q1, Q3]           | -2.6 [-3.8, -2.0] | -2.2 [-3.2, -1.6] | 0.27 |
|                  |     |      |                           | Min, Max                  | -5.5, -0.9        | -6.2, 0.7         |      |
|                  |     |      |                           | One-sample t-test         | <0.001            | <0.001            |      |
|                  |     |      |                           | Wilcoxon signed-rank test | <0.001            | <0.001            |      |
|                  |     |      | 24 週                      | n                         | 19                | 21                |      |
|                  |     |      |                           | Mean ± SD                 | -2.9 ± 1.8        | -2.2 ± 1.4        | 0.17 |
|                  |     |      |                           | Median [Q1, Q3]           | -2.7 [-4.2, -1.8] | -1.7 [-3.2, -1.2] | 0.08 |
|                  |     |      |                           | Min, Max                  | -6.6, 0.6         | -5.7, -0.1        |      |
|                  |     |      |                           | One-sample t-test         | <0.001            | <0.001            |      |
|                  |     |      |                           | Wilcoxon signed-rank test | <0.001            | <0.001            |      |

表 2.4.2. [PPS] ベースライン時 EF50%以上の部分集団での FMD の変化量と EndoPAT の変化量の相関

| 変数 1            | 変数 2                        | n  | Pearson            |      | Spearman           |      |
|-----------------|-----------------------------|----|--------------------|------|--------------------|------|
|                 |                             |    | 相関係数<br>(95%CI)    | P 値  | 相関係数<br>(95%CI)    | P 値  |
| FMD (%) 24 週変化量 | EndoPAT (RHI 指数)<br>24 週変化量 | 27 | 0.20 (-0.19, 0.54) | 0.31 | 0.20 (-0.20, 0.53) | 0.33 |
