# Supplementary material for: Topiroxostat versus allopurinol in patients with chronic heart failure complicated by hyperuricemia: A prospective, randomized, open-label, blinded-end-point clinical trial
Source: PubMed Central journal article supplement (PMC8789120; doi:10.1371/journal.pone.0261445), 2022-01-25

# ANCOVA

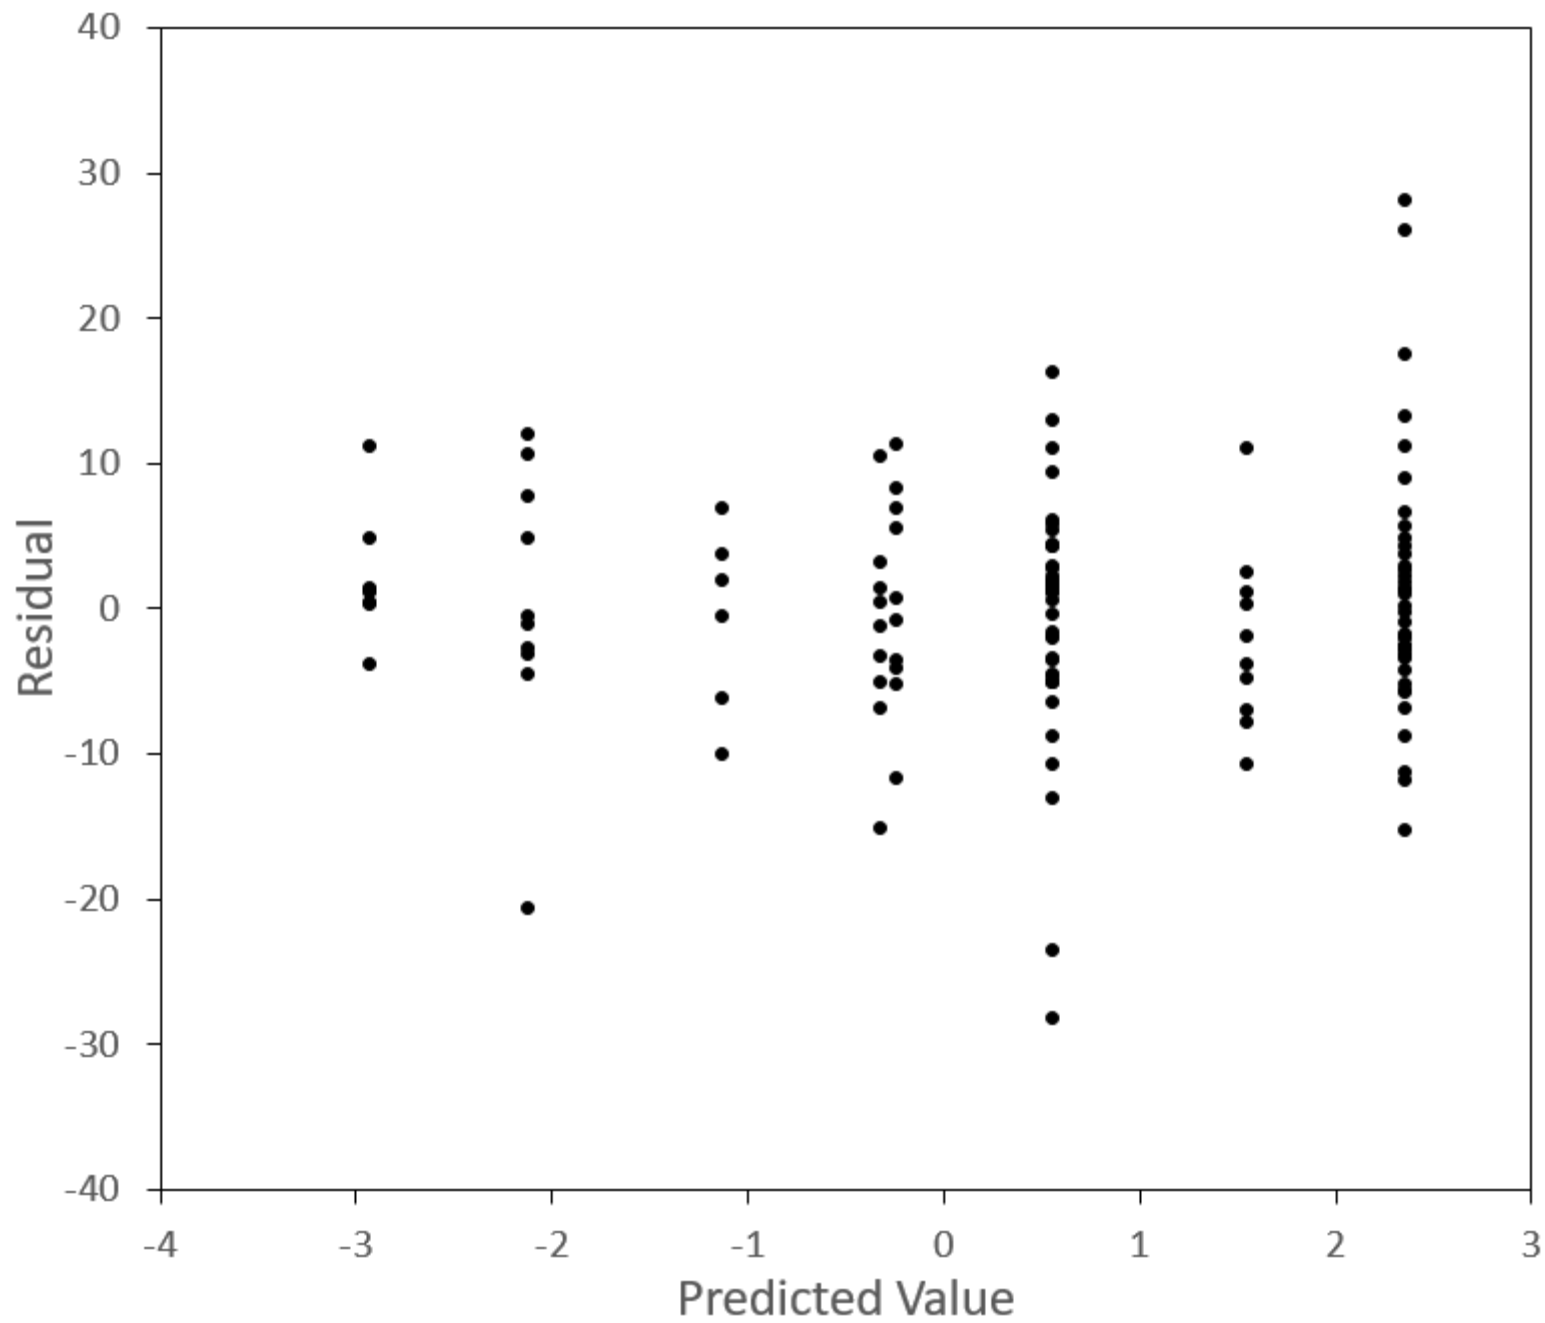

# MMRM

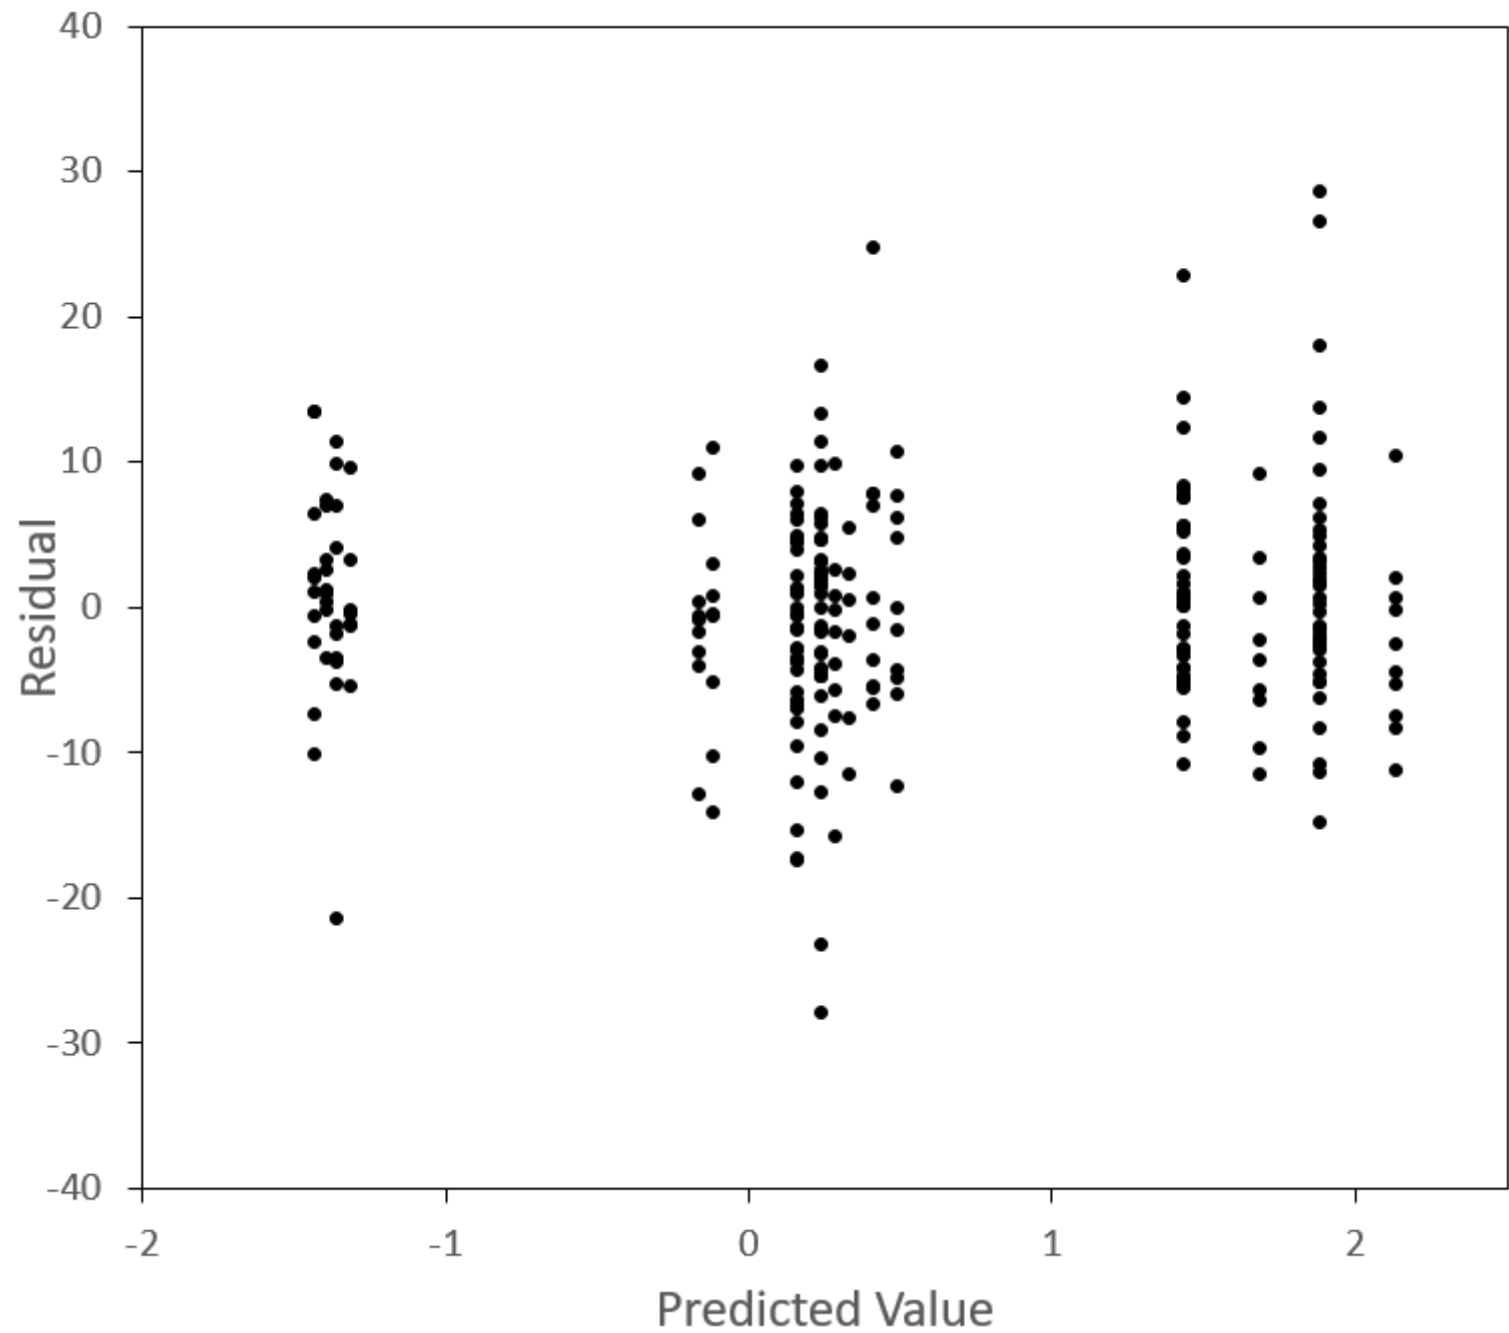

Supplement: pone.0261445.s011.pdf [file pone.0261445.s011.pdf]
